# Supplementary material
Source: Research Square preprint supplement (doi:10.21203/rs.3.rs-8914554/v1)
Supplement: Supplementary file 1 [file 72c672e2fa7db50fef53dc69.xlsx]

## Sheet: TableS6
Table S3_All groups consensus proteome with quantification (exported from Proteome Discoverer 2.5)
Donor: Healthy control, IgAN: IgA nephrophathy, MCD: Minimal change disease, FSGS: Focal segmental glomerulosclerosis
																															File No	F1:	F2:	F3:	F4:	F5:	F6:	F7:	F8:	F9:	F11:	F12:	F13:	F14:	F15:	F16:	F17:	F18:	F21:
																															Study Groups	FSGS,	FSGS,	Donor,	Donor,	IgAN,	IgAN,	IgAN,	IgAN,	IgAN,	IgAN,	IgAN,	IgAN,	IgAN,	IgAN,	IgAN,	IgAN,	IgAN,	IgAN,
Protein FDR Confidence: Combined	Master	Accession	Description	Exp. q-value: Combined	Sum PEP Score	Coverage [%]	# Peptides	# PSMs	# Unique Peptides	# AAs	MW [kDa]	calc. pI	Score Sequest HT: A3 Sequest HT	Score Sequest HT: B3 Sequest HT	Score Sequest HT: C3 Sequest HT	Score Sequest HT: D3 Sequest HT	Score Sequest HT: E3 Sequest HT	Score Sequest HT: F3 Sequest HT	# Peptides (by Search Engine): A3 Sequest HT	# Peptides (by Search Engine): B3 Sequest HT	# Peptides (by Search Engine): C3 Sequest HT	# Peptides (by Search Engine): D3 Sequest HT	# Peptides (by Search Engine): E3 Sequest HT	# Peptides (by Search Engine): F3 Sequest HT	Entrez Gene ID	Gene Symbol	Gene ID	Ensembl Gene ID	WikiPathways	# Protein Pathway Groups	# Razor Peptides	Abundances	Abundances	Abundances	Abundances	Abundances	Abundances	Abundances	Abundances	Abundances	Abundances	Abundances	Abundances	Abundances	Abundances	Abundances	Abundances	Abundances	Abundances
High	Master Protein	Q13813-2	Isoform 2 of Spectrin alpha chain, non-erythrocytic 1 OS=Homo sapiens OX=9606 GN=SPTAN1	0	3317.18	78	277	35532	5	2477	284.9	5.35	8742.48	9778.03	2876.03	15393.2	14779.7	17553	232	218	185	259	252	258		SPTAN1	Q13813-2			0	311	18984253848	18660260038	27723648961	28493781494	25269213799	25392459823	34349681868	27005007753	33430010444	23838756028	27231235885	25760056180	21703926310	21380539253	25368595501	22082751821	20533055824	19320483006
High	Master Protein	Q13813-3	Isoform 3 of Spectrin alpha chain, non-erythrocytic 1 OS=Homo sapiens OX=9606 GN=SPTAN1	0	3308.26	78	276	36025	4	2452	282.1	5.34	8900.88	9989.96	2949.01	15668.3	15086.4	17820	230	217	183	258	251	258		SPTAN1	Q13813-3			0	0	548309114	546757444	738803532	6.06747e+08	846346192	826677946	764125256	8.19077e+08	1355039375	866666354	7.85641e+08	6.16269e+08	5.18794e+08	6.00549e+08	7.36504e+08	6.30568e+08	5.15131e+08	2.38844e+08
High	Master Protein	Q09666	Neuroblast differentiation-associated protein AHNAK OS=Homo sapiens OX=9606 GN=AHNAK PE=1 SV=2	0	3036.61	78	336	24364	336	5890	628.7	6.15	4782.41	5273.12	1982.75	8560.13	9154.11	8144.76	258	244	205	277	310	276	79026	AHNAK	A1A586; hsa:79026; Q09666	ENSG00000124942		0	0	25364429741	32340932229	19359845422	16726351541	25590283167	26200344966	15280643590	29998425829	20990680663	24735359547	30023513074	12538073918	14993215022	29915927825	23328579558	32854368744	28427074138	18294354573
High	Master Protein	P35579	Myosin-9 OS=Homo sapiens OX=9606 GN=MYH9 PE=1 SV=4	0	3036	73	217	33858	186	1960	226.4	5.6	9158.94	10335	2663.84	18319.7	14460.8	15783.7	177	171	148	203	195	187	4627	MYH9	A8K6E4; hsa:4627; O60805; P35579; Q60FE2; Q86T83	ENSG00000100345	Primary focal segmental glomerulosclerosis (FSGS); VEGFA-VEGFR2 signaling; Nephrotic syndrome	16	36	20443036368	28430739956	19822941605	25667376261	16350952476	21694860609	22813041195	29390388444	26976012168	18437239518	18973752625	20753617714	22447436139	36521084995	26389043475	30943872559	26856696150	51319453081
High	Master Protein	Q01082	Spectrin beta chain, non-erythrocytic 1 OS=Homo sapiens OX=9606 GN=SPTBN1 PE=1 SV=2	0	2597.74	72	206	22439	12	2364	274.4	5.57	5737.38	6832.33	1406.57	9654.62	8412.54	10984.5	174	175	123	185	185	191	6711	SPTBN1	B2RP63; hsa:6711; O60837; Q01082; Q16057; Q53R99; Q59ER3; Q8IX99	ENSG00000115306	Sudden infant death syndrome (SIDS) susceptibility pathways	11	239	10771110213	13100166904	9686363659	16842548852	19572318608	15743400508	17448280281	15682244632	15298347844	14930453578	14724722881	15086729387	11912092364	16991548837	16334955059	11821086245	12898673247	12329965882
High	Master Protein	Q01082-3	Isoform 2 of Spectrin beta chain, non-erythrocytic 1 OS=Homo sapiens OX=9606 GN=SPTBN1	0	2449.87	73	196	20489	2	2155	251.2	5.53	5069.75	6072.91	1195	8606.1	7453.68	9851.55	166	166	116	177	178	181		SPTBN1	Q01082-3			0	0	1.72819e+07	4.51716e+07	6.51962e+06	4.12615e+07	7.20149e+07	1.87815e+07	7.42249e+07	3.33659e+07	2.33221e+07	3.50214e+07	7.00901e+07	5.08931e+07	3.51287e+07	6.72312e+07	4.70971e+07	1.42389e+07	3.15559e+07	4.97607e+07
High	Master Protein	P21333	Filamin-A OS=Homo sapiens OX=9606 GN=FLNA PE=1 SV=4	0	2058.93	63	172	31585	158	2647	280.6	6.06	8831.58	11975.2	3367.71	14447.5	12833.2	11131.4	154	148	129	155	162	150	2316	FLNA	E9KL45; hsa:2316; P21333; Q5HY53; Q5HY55; Q8NF52	ENSG00000196924	Androgen receptor signaling pathway; Prolactin signaling pathway; Focal adhesion; Hypothesized pathways in pathogenesis of cardiovascular disease; MAPK signaling pathway; IL-4 signaling pathway; Ebola virus infection in host; Joubert syndrome	13	14	45117734208	46974965477	16923348361	23270846506	12837666037	19552465183	19215801300	27566280600	21911375732	19730103675	20698840472	22363133351	20967403876	29793872978	31901752837	50959786601	36865198200	17119641377
High	Master Protein	P35749	Myosin-11 OS=Homo sapiens OX=9606 GN=MYH11 PE=1 SV=3	0	2046.66	66	183	11501	4	1972	227.2	5.5	3780.55	5936.04	996.61	4874.33	4590.69	3859.24	146	167	96	128	149	122	4629	MYH11	D2JYH7; hsa:4629; O00396; O94944; P35749; P78422; Q3MIV8; Q3MNF0; Q3MNF1	ENSG00000133392; ENSG00000276480	VEGFA-VEGFR2 signaling	8	197	12768058941	17572101999	3016951882	5818341508	6994873295	7716703966	4587323125	7920370759	7318263063	9992811140	4149772734	5632298659	5194478608	8165941026	6390910280	9423023444	9199868366	4242569348
High	Master Protein	Q15149-3	Isoform 3 of Plectin OS=Homo sapiens OX=9606 GN=PLEC	0	1994.2	57	295	12986	2	4570	517.7	5.74	2769.04	2991.33	885.43	6044.62	4726.74	4017.3	210	207	169	258	258	236		PLEC	Q15149-3			0	312	9940354423	14218615755	7048825715	11159241763	12538583523	15916881827	10810979569	12396729964	19085468915	10024723432	11639382999	13433662225	10352761064	16825089803	15931272195	16403087033	13679101518	14442623790
High	Master Protein	Q15149-8	Isoform 8 of Plectin OS=Homo sapiens OX=9606 GN=PLEC	0	1993.82	58	295	12986	2	4525	513.4	5.76	2766.28	2988.4	885.43	6048.45	4726.74	4015.53	210	206	169	259	258	235		PLEC	Q15149-8			0	0	1.04466e+07	3.7735e+07	1.23678e+07	1.72548e+07	7.05301e+07	9.63027e+07	1.62802e+06	1.50117e+08	159474514	5.83032e+07	1.57074e+07	1.52649e+07	1.35559e+07	4.71063e+07	3.72423e+07	4.21104e+07	2.28566e+07	2.52405e+07
High	Master Protein	P35580-4	Isoform 4 of Myosin-10 OS=Homo sapiens OX=9606 GN=MYH10	0	1858.51	67	178	13743	2	2007	232.4	5.55	3354.3	4311.76	1127.09	6513.32	4844.23	5568.95	145	143	105	158	151	148		MYH10	P35580-4			0	176	5546551418	7878662837	5434607560	7942422966	5307237271	4483040681	6969636199	9959800461	7710183371	6377353403	5290760187	5641034216	5617414345	7495722633	7192061506	8059534030	8127083567	9607967683
High	Master Protein	P98160	Basement membrane-specific heparan sulfate proteoglycan core protein OS=Homo sapiens OX=9606 GN=HSPG2 PE=1 SV=4	0	1747.36	41	153	30360	153	4391	468.5	6.51	7588.65	9237.94	3285.18	12151	11542.9	11767.6	124	127	111	131	142	138	3339	HSPG2	hsa:3339; P98160; Q16287; Q5SZI3; Q9H3V5	ENSG00000142798	Hepatitis B infection; Comprehensive IL-17A signaling	18	0	22125686671	21119331021	15358409601	17776633113	16187141335	16314299428	21664929094	24333381691	25666076659	20269913500	16592927542	16205359357	15088603453	15925318145	18430936188	21447483582	21289151323	13175606276
High	Master Protein	P12111	Collagen alpha-3(VI) chain OS=Homo sapiens OX=9606 GN=COL6A3 PE=1 SV=5	0	1462.7	47	154	24901	14	3177	343.5	6.68	6448.17	7537.33	2649.2	12029.2	8418.1	7708.31	134	128	115	143	144	130	1293	COL6A3	A8MT30; B4E3U5; B7ZMJ7; E9PFQ6; E9PGQ9; hsa:1293; P12111; Q16501; Q53QF4; Q53QF6	ENSG00000163359	miRNA targets in ECM and membrane receptors; PI3K-Akt signaling pathway; 2q37 copy number variation syndrome	11	150	17890630915	29515454527	11801079525	14680566812	12426847949	20936906338	26191205813	23371136710	21733118676	15463818781	19170397561	19903652608	18855460192	25243761854	23008078238	28430207051	19370218912	30638688684
High	Master Protein	Q9Y490	Talin-1 OS=Homo sapiens OX=9606 GN=TLN1 PE=1 SV=3	0	1455.13	60	137	14706	122	2541	269.6	6.07	3414.84	4651.36	967.31	6948.39	5703.11	6402.02	112	115	77	126	122	121	7094	TLN1	A6NMY0; hsa:7094; Q86YD0; Q9NZQ2; Q9UHH8; Q9UPX3; Q9Y490	ENSG00000137076	Integrin-mediated cell adhesion; Primary focal segmental glomerulosclerosis (FSGS); Focal adhesion; TROP2 regulatory signaling	18	15	13586992203	15156916619	9636383634	12039313622	11085138663	12004972754	11092982620	11628975141	8535286246	7998037453	12057544689	15100044025	16285247085	13967971940	13376808801	13127063163	15128136761	10881040007
High	Master Protein	P12111-4	Isoform 4 of Collagen alpha-3(VI) chain OS=Homo sapiens OX=9606 GN=COL6A3	0	1387.87	51	142	24467	2	2570	278	8.15	6268.43	7375.61	2593.48	11773.7	8259.57	7538.29	124	121	107	133	137	125		COL6A3	P12111-4			0	0	3.95515e+07	6.71221e+07	1.58185e+07	1.99536e+07	6.31332e+07	9.07811e+07	1.87185e+08	2.15516e+08	1.78864e+08	1900049419	8.02793e+07	4.40399e+07	4.43466e+07	1.54915e+08	3.28058e+07	9.44951e+06	1.11919e+08	6.26819e+08
High	Master Protein	O43707	Alpha-actinin-4 OS=Homo sapiens OX=9606 GN=ACTN4 PE=1 SV=2	0	1382.73	78	100	23704	67	911	104.8	5.44	6663.09	7267.33	1895.56	11423.9	9610.78	12399.5	89	86	66	94	92	94	81	ACTN4	A4K467; D6PXK4; hsa:81; O43707; O76048	ENSG00000130402; ENSG00000282844	Arrhythmogenic right ventricular cardiomyopathy; Primary focal segmental glomerulosclerosis (FSGS); Focal adhesion; Striated muscle contraction pathway; Ebola virus infection in host; Nephrotic syndrome; Alstrom syndrome	9	38	20474587418	21800550963	15998206570	26058229771	14298380764	18010592531	21189808204	18884343298	23071569873	14070114547	25142055323	28028162595	22319306532	21889339659	21561901254	26688814565	21783609407	15364929494
High	Master Protein	P98164	Low-density lipoprotein receptor-related protein 2 OS=Homo sapiens OX=9606 GN=LRP2 PE=1 SV=3	0	1360.95	27	135	13974	135	4655	521.6	5.08	2973.85	3680.01	975.75	5174.1	5268.93	6151.44	101	97	79	118	117	124	4036	LRP2	hsa:4036; O00711; P98164; Q16215	ENSG00000081479	Vitamin B12 metabolism; Complement system; Hedgehog signaling pathway	8	0	7922674114	6606558851	7757916049	10955288332	8062987182	8106931530	10880966368	6908045833	7945049006	9754835314	10577422360	8159318100	8004120183	11959137800	12122346415	6247561282	7344458944	9248354766
High	Master Protein	O75369-8	Isoform 8 of Filamin-B OS=Homo sapiens OX=9606 GN=FLNB	0	1349.87	55	139	15963	126	2633	281.5	5.71	3464.79	3916.93	1310.58	5938.52	6014.94	6675.22	114	114	95	128	125	130		FLNB	O75369-8			0	4	6239547988	9447259639	6854719009	8232055034	8320830068	9831598298	6778607530	9283672273	9863790561	6394754437	8719656186	6844744122	9742904345	9346344996	9527924745	7926665135	9471304477	7161862116
High	Master Protein	P08670	Vimentin OS=Homo sapiens OX=9606 GN=VIM PE=1 SV=4	0	1249.13	98	93	34645	82	466	53.6	5.12	7780.05	8871.76	3133.42	14948	13668.2	12100.9	78	75	66	88	89	81	7431	VIM	B0YJC2; D3DRU4; hsa:7431; P08670; Q15867; Q15868; Q15869; Q548L2; Q6LER9; Q8N850; Q96ML2; Q9NTM3	ENSG00000026025	Allograft rejection; Spinal cord injury; Primary focal segmental glomerulosclerosis (FSGS); Mammary gland development pathway - Puberty (Stage 2 of 4); Apoptosis-related network due to altered Notch3 in ovarian cancer; Striated muscle contraction pathway; TGF-beta signaling in thyroid cells for epithelial-mesenchymal transition; Ciliary landscape; Burn wound healing; CCL18 signaling pathway; TROP…	21	12	55892175750	63727449671	38831542213	46814622619	29712515717	43669761115	52106880096	60113019730	59630617527	27640424099	47256959169	43976551068	58666286122	63430071953	60266935660	56647072127	66183422484	41428007094
High	Master Protein	P05787	Keratin, type II cytoskeletal 8 OS=Homo sapiens OX=9606 GN=KRT8 PE=1 SV=7	0	1209.18	94	78	27789	63	483	53.7	5.59	5892.31	6224.3	2420.92	10599.8	10851.8	10811.1	72	68	66	75	76	74	3856	KRT8	A8K4H3; B0AZN5; F8VXB4; hsa:3856; P05787; Q14099; Q14716; Q14717; Q53GJ0; Q6DHW5; Q6GMY0; Q6P4C7; Q96J60	ENSG00000170421	Primary focal segmental glomerulosclerosis (FSGS); Acute viral myocarditis	4	13	19679029816	36964773282	28318565788	24263370505	46362589606	39154028822	33498925465	39732226022	33190712156	42104035145	32098624373	19254978809	30467842700	31382759723	32615903593	32531365256	28568507538	44176496699
High	Master Protein	P10809	60 kDa heat shock protein, mitochondrial OS=Homo sapiens OX=9606 GN=HSPD1 PE=1 SV=2	0	1173.8	90	77	21417	77	573	61	5.87	5593.73	7004.63	2225.6	10124.4	9075.13	11726.4	64	63	58	74	71	72	3329	HSPD1	B2R5M6; B7Z712; hsa:3329; P10809; Q38L19; Q9UCR6	ENSG00000144381	Apoptosis-related network due to altered Notch3 in ovarian cancer; Sudden infant death syndrome (SIDS) susceptibility pathways	4	0	23434828683	23257471827	32016574577	29039597453	48706104318	29161251553	38783995519	31158101580	26517984654	35480803369	39751192492	31198001600	27918903558	15970040261	26051433732	10602218526	18118920872	19250717156
High	Master Protein	P18206-2	Isoform 1 of Vinculin OS=Homo sapiens OX=9606 GN=VCL	0	1126.71	75	95	13340	95	1066	116.6	6.09	3284.4	4222.39	1142.15	5618.31	4911.93	5226.54	84	83	67	89	88	86		VCL	P18206-2			0	0	15259829305	15325670973	7549983736	10222340666	10345682057	9530733487	8941889174	9889517530	6458917599	7732053507	8874021626	13575348559	14530934026	11927630974	9875180778	14846263148	13473488197	7948566454
High	Master Protein	P02545	Prelamin-A/C OS=Homo sapiens OX=9606 GN=LMNA PE=1 SV=1	0	1011.59	80	95	22328	3	664	74.1	7.02	5725.85	6567.38	2503.61	10538.3	9533.49	8886.04	76	74	69	89	87	81	4000	LMNA	B4DI32; D3DVB0; D6RAQ3; E7EUI9; hsa:4000; P02545; P02546; Q5I6Y4; Q5I6Y6; Q5TCJ2; Q5TCJ3; Q6UYC3; Q969I8; Q96JA2	ENSG00000160789	Arrhythmogenic right ventricular cardiomyopathy; Adipogenesis; Fas ligand pathway and stress induction of heat shock proteins; Lamin A-processing pathway; Nephrotic syndrome; Influence of laminopathies on Wnt signaling; Overlap between signal transduction pathways contributing to LMNA laminopathies; Familial partial lipodystrophy; Progeria-associated lipodystrophy; Acquired partial lipodystrophy …	13	106	27384795786	28442474849	31042198199	26452020846	29097239766	33192236464	33115806619	37701612055	32775075063	26882964043	29714199097	27868385816	34175984208	27678612850	29822080005	29036993033	31160627558	17570573490
High	Master Protein	P02545-2	Isoform C of Prelamin-A/C OS=Homo sapiens OX=9606 GN=LMNA	0	1010.32	88	94	21474	2	572	65.1	6.84	5324.73	6123.6	2295.75	9937.57	8919.31	8348.6	76	74	69	89	86	81		LMNA	P02545-2			0	0	1.99649e+08	1.43905e+08	3.95173e+08	233853273		3.07209e+08	364914977	1.52465e+08	3.85594e+08	1.10782e+06	2.27624e+08	2.21246e+08	2.99654e+08	1.27793e+08	2.28375e+08	98288131	2.05027e+08	3.00464e+06
High	Master Protein	P06576	ATP synthase subunit beta, mitochondrial OS=Homo sapiens OX=9606 GN=ATP5F1B PE=1 SV=3	0	996.186	79	41	28966	41	529	56.5	5.4	8581.48	9885.61	3348.82	14927.4	13292.2	15747	32	34	30	40	38	35	506	ATP5F1B	A8K4X0; hsa:506; P06576; Q14283	ENSG00000110955	Electron transport chain: OXPHOS system in mitochondria; 7q11.23 copy number variation syndrome; Oxidative phosphorylation	7	0	28333518540	23926342016	34274928303	38428909754	37380560910	25973534856	34496912453	25528057892	22591071155	19171031927	43931508908	39472022707	37718259170	25127302236	37237962662	23076253131	25379703872	33271591641
High	Master Protein	O15230	Laminin subunit alpha-5 OS=Homo sapiens OX=9606 GN=LAMA5 PE=1 SV=8	0	988.111	29	103	10649	102	3695	399.5	7.02	2513.73	3184.29	835.21	4576.24	3750.54	4186.15	89	90	70	95	96	92	3911	LAMA5	hsa:3911; O15230; Q5U4N9; Q8TDF8; Q8WZA7; Q9H1P1	ENSG00000130702	Alpha 6 beta 4 signaling pathway; Primary focal segmental glomerulosclerosis (FSGS); Complement system; Focal adhesion; Focal adhesion: PI3K-Akt-mTOR-signaling pathway; PI3K-Akt signaling pathway; Inflammatory response pathway; Small cell lung cancer; Malignant pleural mesothelioma	15	1	6937855014	7529747003	5557555905	6283500205	6427649482	8772774649	7732346389	8395237089	7849065325	7532589893	6526866623	7381856301	7228424564	6985619164	6119685495	5482671783	7256488887	5462602782
High	Master Protein	P04264	Keratin, type II cytoskeletal 1 OS=Homo sapiens OX=9606 GN=KRT1 PE=1 SV=6	0	976.868	74	74	21151	65	644	66	8.12	6139.99	8166.47	1452.84	10663.9	9000.93	8218.59	69	71	49	69	68	71	3848	KRT1	B2RA01; hsa:3848; P04264; P85925; P86104; Q14720; Q6GSJ0; Q9H298	ENSG00000167768	Corticotropin-releasing hormone signaling pathway	4	4	20940470185	30391950690	6099520488	16062896606	34157081809	45223374903	33450768239	13061588222	26158821478	23356994919	49936779946	45349738578	80018302713	24963892877	17705804394	19806435546	28365090106	15134557729
High	Master Protein	P02768	Albumin OS=Homo sapiens OX=9606 GN=ALB PE=1 SV=2	0	968.53	76	73	42906	73	609	69.3	6.28	10082.4	13391.5	5338.91	20433	12693.7	9975.51	59	61	53	67	66	60	213	ALB	E7ESS9; hsa:213; O95574; P02768; P04277; Q13140; Q645G4; Q68DN5; Q6UXK4; Q86YG0; Q8IUK7; Q9P157; Q9P1I7; Q9UHS3; Q9UJZ0	ENSG00000163631	Selenium micronutrient network; Vitamin B12 metabolism; Folate metabolism; Complement system; VEGFA-VEGFR2 signaling	17	0	178000000000	193000000000	144000000000	82527425366	106000000000	233000000000	148000000000	167000000000	112000000000	83486807260	146000000000	89141437170	117000000000	189000000000	106000000000	196000000000	241000000000	370000000000
High	Master Protein	P40939	Trifunctional enzyme subunit alpha, mitochondrial OS=Homo sapiens OX=9606 GN=HADHA PE=1 SV=2	0	932.094	72	66	11795	66	763	82.9	9.04	2611.31	3266.91	950.51	5172.07	4077.39	5926.02	53	48	46	61	51	62	3030	HADHA	B2R7L4; B4DYP2; hsa:3030; P40939; Q16679; Q53T69; Q53TA2; Q96GT7; Q9UQC5	ENSG00000084754	Fatty acid beta-oxidation; Mitochondrial long chain fatty acid beta-oxidation; Valproic acid pathway; Mitochondrial fatty acid oxidation disorders; Sudden infant death syndrome (SIDS) susceptibility pathways	13	0	6107216617	6711031776	8103131749	10034127361	9817326647	8156165481	9952289722	7610576192	6004553124	7354431611	9628794655	10988636825	8509393660	6035750716	9284252172	5875135250	6473395981	6493209467
High	Master Protein	Q05682	Caldesmon OS=Homo sapiens OX=9606 GN=CALD1 PE=1 SV=3	0	920.356	61	79	10544	9	793	93.2	5.66	2940.48	3209.24	1225.67	4563.72	4182.81	3847.35	73	73	64	70	74	64	800	CALD1	A8K0X1; hsa:800; Q05682; Q13978; Q13979; Q14741; Q14742; Q9UD91	ENSG00000122786	Myometrial relaxation and contraction pathways	2	77	11107067616	11718294292	7429534415	7367024395	6185476191	8400823550	11363534863	12742852946	15921876628	6800216309	10110287287	8254541069	9119041433	9586973219	8860822786	13654599933	9402700572	3973472179
High	Master Protein	P01024	Complement C3 OS=Homo sapiens OX=9606 GN=C3 PE=1 SV=2	0	908.826	58	103	9787	102	1663	187	6.4	2854.05	2619.67	1100.09	4141.34	4772.09	2012.24	82	74	68	85	96	68	718	C3	A7E236; hsa:718; P01024	ENSG00000125730	Allograft rejection; Complement system; TYROBP causal network in microglia; Cells and molecules involved in local acute inflammatory response ; 16p11.2 distal deletion syndrome; Complement system in neuronal development and plasticity; Acquired partial lipodystrophy / Barraquer-Simons syndrome; Chronic hyperglycemia impairment of neuron function; Complement activation; Complement and coagulation …	20	1	5654194816	8142166344	6936093709	4027809737	3282673129	6752417643	5354616554	5808347259	6239583499	5158890528	5136345121	4925292208	5339521141	10236951049	4521975812	10037043047	9299179743	12418164486
High	Master Protein	Q99715	Collagen alpha-1(XII) chain OS=Homo sapiens OX=9606 GN=COL12A1 PE=1 SV=2	0	889.063	43	114	4952	114	3063	332.9	5.53	1161.16	863.38	291.37	1987.47	1419.24	2814.41	85	70	59	98	91	106	1303	COL12A1	hsa:1303; O43853; Q15955; Q5VYK1; Q5VYK2; Q71UR3; Q99715; Q99716	ENSG00000111799		4	0	2792185290	2721184721	2421825223	4176736682	2859378320	3540483679	2604998273	4392292637	2098522454	1736890965	5556601182	3016114557	2213952356	3236910423	4957658448	12162989698	2719139649	2893866251
High	Master Protein	P12814-3	Isoform 3 of Alpha-actinin-1 OS=Homo sapiens OX=9606 GN=ACTN1	0	887.832	70	75	10051	40	914	105.5	5.41	2414.27	2983.56	774.91	4594.22	3870.51	3993.53	70	67	51	72	70	68		ACTN1	P12814-3			0	4	3108369698	3627067916	1065211729	1853724364	2291417439	1866171057	1376395003	3674758982	1845108536	1465094865	1835409517	1726916567	1782249763	3270812190	2770997256	3693164108	3410698909	1970375831
High	Master Protein	P38646	Stress-70 protein, mitochondrial OS=Homo sapiens OX=9606 GN=HSPA9 PE=1 SV=2	0	879.225	61	65	17031	64	679	73.6	6.16	4551.14	5250.11	1734.96	7690.56	7003.84	8570.67	58	56	49	64	59	61	3313	HSPA9	B2RCM1; hsa:3313; P30036; P31932; P38646; Q1HB43; Q53H23; Q6GU03; Q9BWB7; Q9UC56	ENSG00000113013	Parkin-ubiquitin proteasomal system pathway; Iron-sulfur cluster biogenesis	6	1	9181291935	8958011033	16147858152	13421338870	17155873264	10308698541	18022784936	12816593278	12887073072	13481293535	15844496477	14541693327	12844647620	8307201499	12759799116	6832401546	8925290344	9533374663
High	Master Protein	Q99798	Aconitate hydratase, mitochondrial OS=Homo sapiens OX=9606 GN=ACO2 PE=1 SV=2	0	877.915	64	65	14081	65	780	85.4	7.61	3793.45	4464.48	1427.92	6179.72	5918.81	7700.97	56	54	51	62	54	61	50	ACO2	hsa:50; O75809; Q5JZ41; Q6FHX0; Q8TAQ6; Q99798	ENSG00000100412	Amino acid metabolism; Metabolic reprogramming in colon cancer; Fluoroacetic acid toxicity; TCA cycle (aka Krebs or citric acid cycle)	6	0	12105876039	12145423491	18068826132	19292333233	15833513109	10410067827	15309669652	14657206253	11559278656	9995436505	19345485082	21911135575	18613421575	10476862082	16993540447	8969837075	10237939762	8422191073
High	Master Protein	P07900	Heat shock protein HSP 90-alpha OS=Homo sapiens OX=9606 GN=HSP90AA1 PE=1 SV=5	0	863.618	62	70	16422	41	732	84.6	5.02	3850.3	4370.73	1264.6	6755.62	6398.22	7560.89	60	57	56	65	67	65	3320	HSP90AA1	A8K500; B3KPJ9; hsa:3320; P07900; Q2PP14; Q5CAQ6; Q5CAQ7; Q9BVQ5	ENSG00000080824	Nucleotide-binding oligomerization domain (NOD) pathway; TNF-alpha signaling pathway; Corticotropin-releasing hormone signaling pathway; Aryl hydrocarbon receptor pathway; Ebstein-Barr virus LMP1 signaling; Aryl hydrocarbon receptor pathway; Constitutive androstane receptor pathway; Pregnane X receptor pathway; Glucocorticoid receptor pathway; Nuclear receptors meta-pathway; NRF2 pathway; VEGFA-V…	67	32	9618582194	15242531866	10667892790	13834831457	14253834916	10509068096	15177320516	13271873751	13072771403	13465664179	14084141676	13454174838	11933151212	18770663202	14764503372	14893174540	13278398811	12749582057
High	Master Protein	P14625	Endoplasmin OS=Homo sapiens OX=9606 GN=HSP90B1 PE=1 SV=1	0	858.706	65	68	14939	66	803	92.4	4.84	3166.46	3670.04	1254.05	6132.6	5767.43	5725.66	60	60	55	65	64	64	7184	HSP90B1	hsa:7184; P14625; Q96A97	ENSG00000166598	Photodynamic therapy-induced unfolded protein response; Focal adhesion: PI3K-Akt-mTOR-signaling pathway; Prion disease pathway; PI3K-Akt signaling pathway; Sudden infant death syndrome (SIDS) susceptibility pathways	11	2	10783466598	14473608377	10491650203	9975676109	10286359902	11728002814	14004447873	11662952148	19007197367	12408889280	13971396787	11650743663	15628316283	15434849187	15094921531	15625694951	11663845007	19350279519
High	Master Protein	Q05682-4	Isoform 4 of Caldesmon OS=Homo sapiens OX=9606 GN=CALD1	0	845.654	76	71	10780	2	538	62.6	6.37	3015.59	3267.93	1251.81	4830.64	4351.76	3965.5	66	66	60	69	67	62		CALD1	Q05682-4			0	0	1.84894e+08	2.00739e+08	1.37482e+08	2.0764e+08	1.22111e+08	3.34483e+08	5.62386e+08	7.83689e+08	6.3408e+08	1.39274e+08	2.29825e+08	2.77897e+08	4.98778e+08	1.52844e+08	1.58621e+08	2.51645e+08	2.04748e+08	100821135
High	Master Protein	P50440-2	Isoform 2 of Glycine amidinotransferase, mitochondrial OS=Homo sapiens OX=9606 GN=GATM	0	844.6	84	46	20895	2	391	44.9	7.06	4752.02	5830.88	1667.43	7810.58	7135.44	10656.8	38	37	34	43	39	43		GATM	P50440-2			0	63	17377365273	10030949775	29712683391	32483813412	20183299129	13974361207	25072843542	16618040876	17049230615	12124556797	27319351451	33138749378	19345408569	6281160407	21561895763	5518561531	14378530047	10385009486
High	Master Protein	P06733	Alpha-enolase OS=Homo sapiens OX=9606 GN=ENO1 PE=1 SV=2	0	840.875	80	54	15989	51	434	47.1	7.39	3333.24	3844.79	1304.21	6042.44	6254.1	6822.94	47	44	41	50	52	50	2023	ENO1	B2RD59; hsa:2023; P06733; P22712; Q16704; Q4TUS4; Q53FT9; Q53HR3; Q658M5; Q6GMP2; Q71V37; Q7Z3V6; Q8WU71; Q96GV1; Q9BT62; Q9UCH6; Q9UM55	ENSG00000074800	Clear cell renal cell carcinoma pathways; Metabolic reprogramming in colon cancer; Aerobic glycolysis; IL-18 signaling pathway; Glycolysis and gluconeogenesis	8	3	15498689346	17408679543	18580890365	16841371095	11689006323	10217076296	16316329054	17713519184	16604936973	9741678435	15957813449	18211967138	17129620248	16417404126	16721469158	11170085260	17585016604	20611202611
High	Master Protein	P26038	Moesin OS=Homo sapiens OX=9606 GN=MSN PE=1 SV=3	0	838.308	76	73	17073	55	577	67.8	6.4	3762.66	4153.43	1201.46	6289.73	6121.04	6474.39	65	62	57	68	69	69	4478	MSN	hsa:4478; P26038	ENSG00000147065	Glial cell differentiation; AGE/RAGE pathway; Measles virus infection; 16p11.2 proximal deletion syndrome; Regulation of actin cytoskeleton	10	23	10635424645	12798592597	14388528498	17197083661	13648219910	15711930909	20113110306	20454479374	32905197945	9503020789	13754464078	17238383190	15669637621	11215856463	12355627050	9191050006	10669913048	11316780132
High	Master Protein	P15144	Aminopeptidase N OS=Homo sapiens OX=9606 GN=ANPEP PE=1 SV=4	0	836.328	51	63	13958	63	967	109.5	5.48	2781.3	3657.85	1012.86	4342.05	4214.34	6687.7	54	58	52	58	59	63	290	ANPEP	hsa:290; P15144; Q16728; Q6GT90; Q8IUK3; Q8IVH3; Q9UCE0	ENSG00000166825	Glutathione metabolism; Cardiac progenitor differentiation	4	0	4914227798	7025537315	9956286427	12268468066	13136352211	6794509523	12285752149	13142192410	11996813432	8730545630	9074994197	8126521621	7382617218	6120564915	9622996741	2282622908	4616513147	6079382136
High	Master Protein	Q16822	Phosphoenolpyruvate carboxykinase [GTP], mitochondrial OS=Homo sapiens OX=9606 GN=PCK2 PE=1 SV=4	0	821.531	65	55	16860	52	640	70.7	7.62	3447.31	4740.72	1092.3	6359.66	5487.86	8030.54	49	49	43	51	48	53	5106	PCK2	B4DW73; hsa:5106; O43253; Q16822; Q86U01; Q9BV62	ENSG00000100889; ENSG00000285241	Adipogenesis; Transcription factor regulation in adipogenesis; PPAR signaling pathway; PI3K-Akt signaling pathway; Krebs cycle disorders; DNA damage response (only ATM dependent)	7	3	9585075244	3988238924	12219394714	19773650295	15188335807	8831500105	18782944856	11293617262	7102714532	8739003615	11879405820	21170808371	7543523927	3834031429	11498629049	3054026745	4928390541	12223508377
High	Master Protein	P11498	Pyruvate carboxylase, mitochondrial OS=Homo sapiens OX=9606 GN=PC PE=1 SV=2	0	820.546	65	67	9170	67	1178	129.6	6.84	2063.42	2571.57	698.06	3379.22	3082.97	4175.2	53	52	47	62	55	63	5091	PC	B4DN00; hsa:5091; P11498; Q16705	ENSG00000173599	Alanine and aspartate metabolism; TCA cycle and deficiency of pyruvate dehydrogenase complex (PDHc); Fatty acid biosynthesis; Amino acid metabolism; Glycolysis and gluconeogenesis	8	0	3428766522	2618057558	4440886389	7116195370	5981020427	4325186469	5357135536	4473308900	4422376489	3102974178	5581400404	6812098308	4566494721	2153833359	4720698493	1814540749	2845433509	4016109569
High	Master Protein	Q02252	Methylmalonate-semialdehyde dehydrogenase [acylating], mitochondrial OS=Homo sapiens OX=9606 GN=ALDH6A1 PE=1 SV=2	0	820.528	69	50	15211	50	535	57.8	8.5	3770.7	5066.7	1317.9	6321.2	5734	8214.74	40	42	40	46	43	46	4329	ALDH6A1	B2R609; B4DFS8; hsa:4329; J3KNU8; Q02252; Q9UKM8	ENSG00000119711		1	0	15417733906	10828461410	20070039882	22709943193	17601697709	12388292227	18050662381	15762174282	12051329868	16680850143	22448326811	25505661849	15157251734	6208732816	14920633450	5403383786	9101026938	7311200560
High	Master Protein	P08133	Annexin A6 OS=Homo sapiens OX=9606 GN=ANXA6 PE=1 SV=3	0	817.776	79	66	9356	66	673	75.8	5.6	1876.04	2456.87	647.19	3592.13	3029.61	3735.14	57	53	48	61	59	60	309	ANXA6	B7Z8A7; D3DQH4; E9PGK1; hsa:309; P08133; Q6ZT79	ENSG00000197043	Calcium regulation in cardiac cells; Prostaglandin synthesis and regulation	3	0	4184439465	4415698072	4628045893	5452992587	2325932780	3683338892	4267262135	4610909791	5175606260	4238691859	3810307457	5668518380	3472351663	5805473233	5532033638	6284880078	5038759168	5940245392
High	Master Protein	P12883	Myosin-7 OS=Homo sapiens OX=9606 GN=MYH7 PE=1 SV=5	0	815.399	49	118	775	36	1935	223	5.8	538.54	188.65	0	75.86	351.68	0	98	37	1	30	94	3	4625	MYH7	A2TDB6; B6D424; hsa:4625; P12883; Q14836; Q14837; Q14904; Q16579; Q2M1Y6; Q92679; Q9H1D5; Q9UDA2; Q9UMM8	ENSG00000092054	IL-18 signaling pathway	1	87	2081086824	7.55525e+08	8.11887e+08	7.05804e+08	5.59005e+08	1310741818	3498337366	7.82314e+08	1418356604	9.86794e+08	6.6239e+08	6.78996e+08	6.49158e+08	7.30424e+08	5.08029e+08	3.30221e+08	4.91481e+08	1678287661
High	Master Protein	Q05682-3	Isoform 3 of Caldesmon OS=Homo sapiens OX=9606 GN=CALD1	0	811.588	72	70	10335	3	558	64.2	7.02	2872.68	3116.74	1226.28	4494.65	4109.01	3843.96	64	63	58	66	66	62		CALD1	Q05682-3			0	0	4.4222e+07	4.60259e+07	1.28914e+07	1.26464e+08	2.42459e+06	5.9133e+07	2.89257e+07	1.33865e+07	7.93278e+07	2.32111e+07	8.41735e+07	5.88205e+07	4.96393e+07	5.35856e+07	9.25172e+07	4.93759e+07	5.44005e+07	5.37509e+07
High	Master Protein	P11021	Endoplasmic reticulum chaperone BiP OS=Homo sapiens OX=9606 GN=HSPA5 PE=1 SV=2	0	810.592	64	66	14492	63	654	72.3	5.16	3650.08	4044.58	1605.52	7053.18	6977.45	6679.85	59	57	50	63	64	63	3309	HSPA5	B0QZ61; hsa:3309; P11021; Q2EF78; Q9NPF1; Q9UK02	ENSG00000044574	Parkin-ubiquitin proteasomal system pathway; Apoptosis-related network due to altered Notch3 in ovarian cancer; Photodynamic therapy-induced unfolded protein response; Prion disease pathway; Unfolded protein response; Orexin receptor pathway	13	3	14019762445	16381006419	10807081302	12381199482	12418893364	11646098117	15588813138	12103654786	11587817770	8126643091	14914846709	11999415975	15846887347	17001582605	16490482632	17776431414	15791915808	22311033670
High	Master Protein	P22105-1	Isoform 3 of Tenascin-X OS=Homo sapiens OX=9606 GN=TNXB	0	806.973	34	111	4786	98	4242	457.9	5.17	839.91	1653.41	454.2	1979.46	1178.34	1322.64	79	93	83	100	80	87		TNXB	P22105-1			0	14	2260505389	2682463935	2121540397	2340725286	9.99773e+08	2378080210	3086911611	3305706732	1819408370	1437159831	2888024026	2101947685	2148508168	2008038543	2391122022	4020838020	3248808128	1234256010
High	Master Protein	P04406	Glyceraldehyde-3-phosphate dehydrogenase OS=Homo sapiens OX=9606 GN=GAPDH PE=1 SV=3	0	797.315	93	41	17129	41	335	36	8.46	4496.22	5103.72	1626.06	7801.59	7762	8912.31	32	31	29	39	34	37	2597	GAPDH	E7EUT4; hsa:2597; P00354; P04406; Q53X65	ENSG00000111640	Cori cycle; Alzheimer's disease and miRNA effects; HIF1A and PPARG regulation of glycolysis; VEGFA-VEGFR2 signaling; Clear cell renal cell carcinoma pathways; Metabolic reprogramming in colon cancer; Aerobic glycolysis; 7q11.23 copy number variation syndrome; Glycolysis in senescence; Alzheimer's disease; Sildenafil treatment; Glycolysis and gluconeogenesis; Sudden infant death syndrome (SIDS) su…	15	0	16135245486	15310878000	13479571545	21899425414	8167091708	7380093332	13098735641	13256699999	16497722763	5836813253	14614857311	20676492135	18773084342	13790565432	17450850364	13889805612	14789391027	21516030822
High	Master Protein	P63261	Actin, cytoplasmic 2 OS=Homo sapiens OX=9606 GN=ACTG1 PE=1 SV=1	0	796.478	77	39	46894	2	375	41.8	5.48	13205.8	14748.2	4085.29	23754	20037.2	19494.7	31	30	25	34	34	33	71	ACTG1	A8K7C2; hsa:71; P02571; P14104; P63261; P99022; Q5U032; Q96E67	ENSG00000184009	Arrhythmogenic right ventricular cardiomyopathy; Pathogenic Escherichia coli infection; Common pathways underlying drug addiction; Myometrial relaxation and contraction pathways; Focal adhesion; Fas ligand pathway and stress induction of heat shock proteins; Striated muscle contraction pathway; VEGFA-VEGFR2 signaling; Ebola virus infection in host; Thermogenesis; Mechanoregulation and pathology o…	40	51	118000000000	145000000000	89168975298	88488896194	120000000000	107000000000	124000000000	137000000000	150000000000	132000000000	115000000000	124000000000	125000000000	151000000000	132000000000	174000000000	143000000000	182000000000
High	Master Protein	P00966	Argininosuccinate synthase OS=Homo sapiens OX=9606 GN=ASS1 PE=1 SV=2	0	794.617	88	52	14067	52	412	46.5	8.02	2840.28	3515.26	782.96	4773.38	4501.59	5720.82	43	43	37	49	45	47	445	ASS1	hsa:445; P00966; Q6LDL2; Q86UZ0; Q96GT4	ENSG00000130707	Alanine and aspartate metabolism; Amino acid metabolism	3	0	14822712210	12047760051	21047628382	17586653982	25164458310	18048585177	17114620733	13188894772	15493981917	16319315837	19511502371	29747208338	13579227315	9114992632	16920432656	6150249973	11434456295	4750506562
High	Master Protein	Q16891-2	Isoform 2 of MICOS complex subunit MIC60 OS=Homo sapiens OX=9606 GN=IMMT	0	793.568	68	72	5436	2	747	82.6	6.57	1272.26	1443.46	385	2057.24	1813.11	2553.56	56	56	50	65	59	70		IMMT	Q16891-2			0	82	2457281948	2558245107	3684377190	4454703348	3784724385	2850724045	4495007723	3660205481	3811778307	2680973350	3659495003	3783950758	3253381664	2552978999	3232898212	1654689867	2334415644	3222586628
High	Master Protein	P55072	Transitional endoplasmic reticulum ATPase OS=Homo sapiens OX=9606 GN=VCP PE=1 SV=4	0	784.17	63	69	7715	69	806	89.3	5.26	1525.85	1740.97	581.22	2774.8	2954.55	3232.03	55	55	46	65	66	64	7415	VCP	B2R5T8; hsa:7415; P55072; Q0V924; Q2TAI5; Q969G7; Q9UCD5	ENSG00000165280	Alstrom syndrome; Clock-controlled autophagy in bone metabolism	20	0	3506305698	3242868781	2767399431	4117766964	2461419093	2535186815	3122629026	2979235502	4600512687	2476014728	3698492763	3292209657	3577442087	3767941383	4186274603	3520668031	3601297281	4032072607
High	Master Protein	P68133	Actin, alpha skeletal muscle OS=Homo sapiens OX=9606 GN=ACTA1 PE=1 SV=1	0	774.721	66	35	39357	4	377	42	5.39	10450.3	11723.7	3125.84	17473	15380.4	14090.6	31	33	25	31	35	28	58	ACTA1	hsa:58; P02568; P68133; P99020; Q5T8M9	ENSG00000143632	Myometrial relaxation and contraction pathways; Fas ligand pathway and stress induction of heat shock proteins; Physico-chemical features and toxicity-associated pathways; Striated muscle contraction pathway; Mechanoregulation and pathology of YAP/TAZ via Hippo and non-Hippo mechanisms; IL-18 signaling pathway; Malignant pleural mesothelioma	8	14	24188862398	16230683143	7681772239	10847292199	2398279580	5290420818	3770875604	9386732293	11079550515	6837344612	5501289561	9638542904	7525992925	12058767937	12485603594	26914236835	12035509993	3819800381
High	Master Protein	P02671	Fibrinogen alpha chain OS=Homo sapiens OX=9606 GN=FGA PE=1 SV=2	0	773.713	48	62	10506	62	866	94.9	6.01	3201.4	2922.48	838.01	3163.12	4750.28	3381.77	52	45	35	38	57	48	2243	FGA	A8K3E4; D3DP14; D3DP15; hsa:2243; P02671; Q4QQH7; Q9BX62; Q9UCH2	ENSG00000171560	Selenium micronutrient network; Folate metabolism; Blood clotting cascade; Complement system; VEGFA-VEGFR2 signaling; Fibrin complement receptor 3 signaling pathway; COVID-19, thrombosis and anticoagulation; Network map of SARS-CoV-2 signaling pathway	29	0	34644219851	5492972120	18146770299	2294765902	2182154112	11229163051	3436978040	3365157323	7892757294	2517450189	3926670664	2842142792	4171636759	6888653118	3141237993	5491698071	6378761546	3156380885
High	Master Protein	P11142	Heat shock cognate 71 kDa protein OS=Homo sapiens OX=9606 GN=HSPA8 PE=1 SV=1	0	765.894	69	58	19308	36	646	70.9	5.52	5665.41	5857.32	1915.86	9386.34	9334.23	9272.62	51	49	46	54	55	55	3312	HSPA8	hsa:3312; P11142; Q9H3R6	ENSG00000109971	Parkin-ubiquitin proteasomal system pathway; MAPK signaling pathway; Exercise-induced circadian regulation; Measles virus infection; Opioid receptor pathways; Extrafollicular and follicular B cell activation by SARS-CoV-2; 1p36 copy number variation syndrome	24	13	10344652007	10973070006	12536697455	14164297452	11010683956	10701850646	14317709229	11059482651	16712591722	6398523789	13234420671	12689177543	14016626754	12166807833	13356139342	10835456386	12132962049	14871416987
High	Master Protein	P00558	Phosphoglycerate kinase 1 OS=Homo sapiens OX=9606 GN=PGK1 PE=1 SV=3	0	764.823	89	50	12058	44	417	44.6	8.1	3077.28	3569.52	1119.01	5157.77	5156.56	6181.45	42	39	37	48	44	44	5230	PGK1	A8K4W6; B7Z7A9; hsa:5230; P00558; Q5J7W1; Q6IBT6; Q8NI87	ENSG00000102144	Cori cycle; Photodynamic therapy-induced HIF-1 survival signaling; VEGFA-VEGFR2 signaling; Clear cell renal cell carcinoma pathways; Metabolic reprogramming in colon cancer; Aerobic glycolysis; Glycolysis in senescence; Glycolysis and gluconeogenesis	11	7	8065132513	7069844843	8307051438	11125735058	7286907526	5583962397	9896726978	7427074632	7629560842	3575582861	7732796766	10172091216	9956904216	7007727132	8449573498	5288335830	8486166948	9716460964
High	Master Protein	P42765	3-ketoacyl-CoA thiolase, mitochondrial OS=Homo sapiens OX=9606 GN=ACAA2 PE=1 SV=2	0	762.616	79	39	8204	39	397	41.9	8.09	1630.8	2450.47	815.72	3742.3	3174.27	4640.73	30	30	26	37	33	35	10449	ACAA2	hsa:10449; P42765; Q9BUT6	ENSG00000167315	Fatty acid biosynthesis; 10q11.21q11.23 copy number variation syndrome	3	0	6565420956	3811766352	9776474905	9356228029	6111087838	5047000625	7945140574	6327405168	4796419164	3852704779	7821257927	8147006755	5563937186	2587855203	5739197598	1649521013	3835478789	6557100582
High	Master Protein	P08238	Heat shock protein HSP 90-beta OS=Homo sapiens OX=9606 GN=HSP90AB1 PE=1 SV=4	0	762.213	62	66	14378	32	724	83.2	5.03	3286.82	3688.54	1145.14	6196.21	5843.44	6282.63	55	55	46	59	62	61	3326	HSP90AB1	B2R5P0; hsa:3326; P08238; Q5T9W7; Q9NQW0; Q9NTK6	ENSG00000096384	Nuclear receptors meta-pathway; NRF2 pathway; Focal adhesion: PI3K-Akt-mTOR-signaling pathway; PI3K-Akt signaling pathway	23	7	2406240493	4802576540	2579366814	3637645566	3683684107	4112070160	3877673796	3343695681	3483035513	4021079119	3869969929	3916396372	4440302816	6137776517	4846625788	5525328001	4081671586	3081676623
High	Master Protein	P62736	Actin, aortic smooth muscle OS=Homo sapiens OX=9606 GN=ACTA2 PE=1 SV=1	0	757.525	66	33	38465	3	377	42	5.39	10318.5	11847.9	3115.93	17154.6	14974.2	13672.9	31	32	26	30	33	29	59	ACTA2	B2R8A4; hsa:59; P03996; P04108; P62736; Q6FI19	ENSG00000107796	Myometrial relaxation and contraction pathways; Striated muscle contraction pathway; Mechanoregulation and pathology of YAP/TAZ via Hippo and non-Hippo mechanisms; 22q11.2 copy number variation syndrome; IL-18 signaling pathway; Regucalcin in proximal tubule epithelial kidney cells; Angiotensin II receptor type 1 pathway; Malignant pleural mesothelioma; CCL18 signaling pathway; Urotensin-II-media…	16	0	3056099735	1833049329	8.63431e+08	1468881829	6.38443e+07	2.89193e+08	4.97758e+08	8.76468e+08	6.0964e+08	1.5771e+08	7.54772e+08	1078836257	5.49349e+08	1009307789	1268468086	1493380378	1408381754	4.90098e+08
High	Master Protein	P12882	Myosin-1 OS=Homo sapiens OX=9606 GN=MYH1 PE=1 SV=3	0	755.175	44	104	551	21	1939	223	5.74	224.91	548.26	0	5.67	168.11	0	56	93	1	8	49	2	4619	MYH1	hsa:4619; P12882; Q14CA4; Q9Y622	ENSG00000109061		0	0	8.11121e+08	5.42512e+06	4.48404e+07	1.35412e+07	7.0738e+07	1.13307e+07	4.18641e+07	1.68138e+07	3.35142e+07	1.16319e+07	1.57411e+07	1.35999e+07	1.91673e+07	2.54284e+07	1.583e+07	1.60354e+07	4.93292e+06	7.08772e+07
High	Master Protein	Q9UKX2	Myosin-2 OS=Homo sapiens OX=9606 GN=MYH2 PE=1 SV=1	0	752.417	44	104	502	25	1941	222.9	5.82	168.2	550.21	0	5.67	144.82	0	44	96	1	8	41	2	4620	MYH2	A0AVL4; hsa:4620; Q14322; Q16229; Q567P6; Q86T56; Q9UKX2	ENSG00000125414		2	56	3329852494	1.1926e+08	1.71341e+08	1.22533e+08	427940707	2.88049e+08	1709352305	4.07295e+08	3.647e+08	7.47675e+07	1.23318e+08	1.38653e+08	177545348	1.1064e+08	2.03616e+08	6.97636e+07	1.18904e+08	2.69181e+08
High	Master Protein	P02787	Serotransferrin OS=Homo sapiens OX=9606 GN=TF PE=1 SV=4	0	743.396	66	64	11951	64	698	77	7.12	3352.8	3977.61	1670.56	5234.56	4817.16	2584.61	57	50	44	57	53	49	7018	TF	hsa:7018; O43890; P02787; Q1HBA5; Q9NQB8; Q9UHV0	ENSG00000091513	Iron metabolism in placenta; Pluripotent stem cell differentiation pathway; Ferroptosis; IL-18 signaling pathway; 3q29 copy number variation syndrome; Sudden infant death syndrome (SIDS) susceptibility pathways	13	0	15663361918	10015954385	11919323708	6063642466	3084437107	11809994008	9160227781	6209378763	4516083036	4163949900	6017738494	5182711469	6471209850	12930245801	6242121203	14001524999	15061919984	3423340205
High	Master Protein	Q14204	Cytoplasmic dynein 1 heavy chain 1 OS=Homo sapiens OX=9606 GN=DYNC1H1 PE=1 SV=5	0	730.502	28	115	3088	115	4646	532.1	6.4	596.25	639.41	105.64	1187.74	951.24	1238.88	72	73	34	93	90	98	1778	DYNC1H1	B0I1R0; hsa:1778; Q14204; Q6DKQ7; Q8WU28; Q92814; Q9Y4G5	ENSG00000197102	Ciliary landscape; Intraflagellar transport proteins binding to dynein	22	0	1691267649	2591236182	1648057119	2463611841	2164705099	2082449531	3417112153	1849215962	1506993374	2209038429	1730838936	1778444015	1949263135	3524409767	2683185109	2970673971	2259815491	2235914266
High	Master Protein	Q02952	A-kinase anchor protein 12 OS=Homo sapiens OX=9606 GN=AKAP12 PE=1 SV=4	0	715.767	55	82	3841	82	1782	191.4	4.41	966.62	989.49	532.56	1901.06	2169.6	1582.07	55	54	54	68	70	63	9590	AKAP12	hsa:9590; O00310; O00498; Q02952; Q4LE68; Q5SZ80; Q5TGN1; Q68D82; Q99970	ENSG00000131016	G protein signaling pathways	3	0	1868142368	3005806607	1891171744	1797781135	1415120300	1619648852	1602254497	3289631181	2631148211	2309499105	2119790117	1066666589	1701892888	3023645301	2642932120	3936351814	2565937839	1726368165
High	Master Protein	P02751-1	Isoform 1 of Fibronectin OS=Homo sapiens OX=9606 GN=FN1	0	713.861	35	69	8106	69	2386	262.5	5.71	2471.46	2357.63	793.56	3689.17	2992.08	4408.09	59	55	51	63	63	66		FN1	P02751-1			0	0	6449996440	8644513930	14773474022	4644931022	3375287865	7115497172	5270513075	4144949934	6134645133	3800703183	4715354275	4179620347	4994777947	7551595370	5840915554	7526633977	4837594343	3182504159
High	Master Protein	P15311	Ezrin OS=Homo sapiens OX=9606 GN=EZR PE=1 SV=4	0	712.637	69	65	14513	46	586	69.4	6.27	3250.44	3698.71	1133.35	5345.98	5340.6	5696.79	51	55	51	56	57	59	7430	EZR	E1P5A8; hsa:7430; P15311; P23714; Q4VX75; Q96CU8; Q9NSJ4	ENSG00000092820	Pathogenic Escherichia coli infection; AGE/RAGE pathway; VEGFA-VEGFR2 signaling; 16p11.2 proximal deletion syndrome; CCL18 signaling pathway; Regulation of actin cytoskeleton; GDNF signaling	11	2	5631376898	5657351200	6863523652	7435852521	8129879084	5635189833	12086974115	10392601788	13206208708	4669770384	7257255772	6211235170	7204908741	4666128479	6035215914	3705680820	5487152842	4423082622
High	Master Protein	P05062	Fructose-bisphosphate aldolase B OS=Homo sapiens OX=9606 GN=ALDOB PE=1 SV=2	0	710.715	86	44	30325	42	364	39.4	7.87	9585.96	10377.9	2974.01	14293.9	15135	16361.2	35	35	32	40	37	40	229	ALDOB	hsa:229; P05062; Q13741; Q13742; Q5T7D6	ENSG00000136872	Clear cell renal cell carcinoma pathways; Metabolic reprogramming in colon cancer; Disorders of fructose metabolism; Glycolysis and gluconeogenesis; Polyol pathway	9	2	45844508883	33615798126	58780644322	61607962190	45563798076	37011925554	42329610636	38145193210	45232995394	43589703332	54488999950	63497465291	43393303701	26694610201	50618740353	17333049490	26231480228	13409655066
High	Master Protein	Q93088	Betaine--homocysteine S-methyltransferase 1 OS=Homo sapiens OX=9606 GN=BHMT PE=1 SV=2	0	709.869	77	42	14515	36	406	45	7.03	3288.95	3819.2	935.49	5082.88	4567.87	6587.87	38	35	30	38	36	39	635	BHMT	hsa:635; Q93088; Q9UNI9	ENSG00000145692	One-carbon metabolism; Trans-sulfuration, one-carbon metabolism and related pathways; Methionine de novo and salvage pathway; Amino acid metabolism; Male infertility	7	5	12372882231	11596563030	21733419047	23520869680	18632179666	18507464419	27406932069	16860297859	17252865798	13426808371	18236184567	20524100612	16103164699	5963353313	13044841663	4769456992	12466209091	4322016086
High	Master Protein	P22626	Heterogeneous nuclear ribonucleoproteins A2/B1 OS=Homo sapiens OX=9606 GN=HNRNPA2B1 PE=1 SV=2	0	697.882	82	52	12276	47	353	37.4	8.95	3162.29	3500.39	1430.07	5825.1	5821.07	5930.89	40	37	36	47	51	47	3181	HNRNPA2B1	A0A024RA27; A0A024RA61; A8K064; hsa:3181; P22626; P22627; Q9UC98; Q9UDJ2	ENSG00000122566	mRNA processing	4	5	7279659086	9362609990	12717783379	8521234170	7084641589	9626607407	12849523012	9533004319	15123934793	7978462304	8017719947	7347003285	8295344531	9910288927	10974951394	8419622206	8757792892	7420614655
High	Master Protein	P68371	Tubulin beta-4B chain OS=Homo sapiens OX=9606 GN=TUBB4B PE=1 SV=1	0	695.972	75	36	17971	2	445	49.8	4.89	4613.5	5558.06	1638.61	8345.97	8031.84	9299.45	29	30	27	33	32	34	10383	TUBB4B	A2BFA2; hsa:10383; P05217; P68371	ENSG00000188229	Alzheimer's disease and miRNA effects; Pathogenic Escherichia coli infection; Parkin-ubiquitin proteasomal system pathway; Alzheimer's disease	41	52	15043211869	11578255683	12234094444	19195214322	11262725505	7713046829	13103122828	9506260653	8700027535	11077777187	13102981280	16239643328	13934049516	16388123552	16945695591	15997197224	13917379802	20882300918
High	Master Protein	P08727	Keratin, type I cytoskeletal 19 OS=Homo sapiens OX=9606 GN=KRT19 PE=1 SV=4	0	691.734	97	58	11778	37	400	44.1	5.14	2656.87	2612.72	1298.03	4337.33	5314.22	3967.51	46	39	40	45	56	44	3880	KRT19	B2R874; hsa:3880; P08727; Q5XG83; Q6NW33; Q7L5M9; Q96A53; Q96FV1; Q9BYF9; Q9P1Y4	ENSG00000171345	Galanin receptor pathway	3	25	7852730745	12801054103	11210678124	7887978754	8706377787	10684765838	12550769323	16250605275	10385739642	6853013497	9110536804	10364249023	14598029794	8733158414	10389683292	10714296568	13188867081	5638701145
High	Master Protein	Q9UI17	Dimethylglycine dehydrogenase, mitochondrial OS=Homo sapiens OX=9606 GN=DMGDH PE=1 SV=2	0	686.928	65	61	5556	61	866	96.8	7.62	1012.96	1607.06	462.16	1891.6	1470.12	3080.07	48	50	40	52	50	58	29958	DMGDH	B2RBN0; B4E1J9; hsa:29958; Q9UI17	ENSG00000132837	Trans-sulfuration, one-carbon metabolism and related pathways	2	0	2913593858	1211728240	3023705674	5725810549	5194756325	2346019909	2846117013	2925413139	1760068912	2168485093	3725646068	4641377663	2218975945	1105576150	3167590025	6.92227e+08	2228842254	2871740081
High	Master Protein	P05783	Keratin, type I cytoskeletal 18 OS=Homo sapiens OX=9606 GN=KRT18 PE=1 SV=2	0	683.336	95	60	12113	57	430	48	5.45	1958.49	2171.05	861.8	3896.38	4218.25	3817.72	43	44	41	54	59	54	3875	KRT18	hsa:3875; P05783; Q53G38; Q5U0N8; Q9BW26	ENSG00000111057	Pathogenic Escherichia coli infection	3	4	16020279606	27732614207	16028937084	16897416702	21878564412	25597481397	26830692394	28453380881	26908500823	127000000000	35255083151	17362322271	34703863397	24602729755	24593415089	39471653186	26034719666	42626312073
High	Master Protein	Q08426	Peroxisomal bifunctional enzyme OS=Homo sapiens OX=9606 GN=EHHADH PE=1 SV=3	0	682.44	62	56	6636	56	723	79.4	9.14	1763.69	2235.76	387.91	2361.44	2328.6	3734.34	48	48	43	52	50	52	1962	EHHADH	A8K6Y3; B4DWG3; D3DNU0; hsa:1962; Q08426; Q58EZ5	ENSG00000113790	Constitutive androstane receptor pathway; PPAR-alpha pathway; Nuclear receptors meta-pathway; Mitochondrial long chain fatty acid beta-oxidation; Valproic acid pathway; Amino acid metabolism; PPAR signaling pathway; Eicosanoid metabolism via cyclooxygenases (COX); Eicosanoid metabolism via lipooxygenases (LOX); Mitochondrial fatty acid oxidation disorders	12	0	3054515206	3428421323	3588774068	5466649351	3790168869	6437439870	4517619346	6491915625	8262510018	2915669840	3618471430	4619326009	3247600140	3591047438	3398723962	1744407409	2404667777	2937273324
High	Master Protein	P04040	Catalase OS=Homo sapiens OX=9606 GN=CAT PE=1 SV=3	0	677.498	72	47	8488	47	527	59.7	7.39	2399.68	2825.9	883.28	3598.09	3819.69	4467.32	39	38	33	43	43	43	847	CAT	A8K6C0; B2RCZ9; D3DR07; hsa:847; P04040; Q2M1U4; Q4VXX5; Q9BWT9; Q9UC85	ENSG00000121691	Selenium micronutrient network; Folate metabolism; Amyotrophic lateral sclerosis (ALS); Oxidative stress response; Tryptophan metabolism; Male infertility; Arsenic metabolism and reactive oxygen species generation; DNA damage response (only ATM dependent)	12	0	7525191639	3708674551	9384172632	8498610618	4881960363	5957168734	7425371560	6186550091	4885375468	4296871714	7431781971	9658377332	6599704676	4448896313	5345005668	3770572733	2894295324	2471929819
High	Master Protein	P0DMV9	Heat shock 70 kDa protein 1B OS=Homo sapiens OX=9606 GN=HSPA1B PE=1 SV=1	0	676.417	66	58	12701	33	641	70	5.66	3208.17	3540.83	1123.1	5443.84	4816.79	6092.22	51	46	40	53	54	57	3303; 3304	HSPA1B	B4E3B6; hsa:3303; hsa:3304; P08107; P0DMV9; P19790; Q5JQI4; Q5SP17; Q9UQL9; Q9UQM0	ENSG00000204388; ENSG00000212866; ENSG00000224501; ENSG00000231555; ENSG00000232804	Apoptosis modulation and signaling; Parkin-ubiquitin proteasomal system pathway; MAPK signaling pathway; Apoptosis modulation by HSP70; VEGFA-VEGFR2 signaling; Measles virus infection; CKAP4 signaling pathway map	12	27	10505170153	11530881933	10119171384	10601045849	9830039656	8326792745	10785498881	10706914798	9958240322	6644062698	10791246341	9835941128	10580986125	10875347462	11079586147	11509218162	11652390488	12563513191
High	Master Protein	P00367	Glutamate dehydrogenase 1, mitochondrial OS=Homo sapiens OX=9606 GN=GLUD1 PE=1 SV=2	0	673.842	62	46	13418	20	558	61.4	7.8	3317.26	3778.12	1030.72	4621.24	4203.18	6803.43	38	39	36	45	39	42	2746	GLUD1	B3KV55; B4DGN5; hsa:2746; P00367; Q5TBU3	ENSG00000148672	VEGFA-VEGFR2 signaling; Amino acid metabolism; Metabolic reprogramming in colon cancer; 22q11.2 copy number variation syndrome; Amino acid metabolism pathway excerpt: histidine catabolism extension	7	34	7710156725	6348223144	13467857561	15339990456	19328493985	8807761493	14838171186	8012920322	11957170621	9095663618	11406719169	22563437450	9870755842	4741952207	10556461477	4007508756	6949462543	4669232037
High	Master Protein	P55268	Laminin subunit beta-2 OS=Homo sapiens OX=9606 GN=LAMB2 PE=1 SV=2	0	669.685	35	62	7407	62	1798	195.9	6.52	1959.54	2441.96	785.7	3468.26	2655.46	3187.21	55	54	49	59	57	54	3913	LAMB2	hsa:3913; P55268; Q16321	ENSG00000172037	Alpha 6 beta 4 signaling pathway; Primary focal segmental glomerulosclerosis (FSGS); miRNA targets in ECM and membrane receptors; Focal adhesion; Focal adhesion: PI3K-Akt-mTOR-signaling pathway; PI3K-Akt signaling pathway; Inflammatory response pathway; Small cell lung cancer; Nephrotic syndrome; Genes controlling nephrogenesis; Malignant pleural mesothelioma	17	0	9215620534	6623648275	5642994667	7090846628	4857982785	7036158110	5551384412	5529316765	5097460459	8729802319	7267816242	7559595310	7638105373	6301181631	5545660759	7971670042	7195437085	4903240556
High	Master Protein	P35527	Keratin, type I cytoskeletal 9 OS=Homo sapiens OX=9606 GN=KRT9 PE=1 SV=3	0	667.511	85	53	13637	52	623	62	5.24	3429.15	5332.92	728.85	6458.82	5575.05	5037.63	39	43	33	47	46	44	3857	KRT9	hsa:3857; O00109; P35527; Q0IJ47; Q14665	ENSG00000171403		2	0	10378446730	12301423668	3185596360	8155757675	24104095238	19223732245	17006257004	8911804739	12641447275	13032404907	20861260340	24741163535	47481527576	19994599797	8696051348	10953207198	12466649007	8342036644
High	Master Protein	P27816	Microtubule-associated protein 4 OS=Homo sapiens OX=9606 GN=MAP4 PE=1 SV=3	0	667.42	61	73	5745	36	1152	120.9	5.43	1135.43	1139.87	541.36	2116.58	2339.04	2255.3	54	52	50	62	64	67	4134	MAP4	hsa:4134; P27816; Q13082; Q59FT2; Q68D74; Q6ZUW9; Q86V26; Q96A76; Q96NS9	ENSG00000047849	Splicing factor NOVA regulated synaptic proteins; 2q37 copy number variation syndrome	2	47	2245599156	2815947559	2567456377	2763269463	5495890271	7501948513	3629183783	5760264228	7685630117	2777022967	2920992057	2582644796	4092333141	3271361450	2798107109	3209132429	2590811622	2616403379
High	Master Protein	Q5T2W1	Na(+)/H(+) exchange regulatory cofactor NHE-RF3 OS=Homo sapiens OX=9606 GN=PDZK1 PE=1 SV=2	0	665.63	72	45	10377	45	519	57.1	5.55	2581.01	3419.76	994.27	3742.25	4058.17	5576.06	37	38	35	39	38	41	5174	PDZK1	B4DPB9; E7EU02; hsa:5174; O60450; Q5T2W1; Q5T5P6; Q9BQ41	ENSG00000174827		0	0	6313901473	4864331571	8084871000	9464039295	6587123393	5476920676	7230314789	6216324779	7244754870	4784436348	6525852310	7211104284	5633960134	3626868915	6054749091	2780632096	4059017620	2924775145
High	Master Protein	P01009	Alpha-1-antitrypsin OS=Homo sapiens OX=9606 GN=SERPINA1 PE=1 SV=3	0	662.421	72	46	12933	46	418	46.7	5.59	2484.39	2271.19	1413.67	3921.16	5850.79	2453.83	39	38	35	40	46	38	5265	SERPINA1	A6PX14; B2RDQ8; hsa:5265; P01009; Q0PVP5; Q13672; Q53XB8; Q5U0M1; Q7M4R2; Q86U18; Q86U19; Q96BF9; Q96ES1; Q9P1P0; Q9UCE6; Q9UCM3	ENSG00000197249	Nuclear receptors meta-pathway; NRF2 pathway; Lung fibrosis; Lung fibrosis; Complement and coagulation cascades	11	0	14099852400	23592995340	13132814000	6799427481	2598312120	12135484280	11775406095	11042913605	14390256391	10880012893	9903645689	5064180586	8482011500	21722658256	11517418168	32482449498	17206688637	16225977857
High	Master Protein	Q96KP4	Cytosolic non-specific dipeptidase OS=Homo sapiens OX=9606 GN=CNDP2 PE=1 SV=2	0	656.438	71	40	10566	40	475	52.8	5.97	2814.36	3439.33	985.91	5012.44	4591.01	5493.15	34	33	30	38	35	38	55748	CNDP2	B3KUG4; hsa:55748; Q8WY59; Q96KP4; Q9BQ94; Q9NVB4; V9HWE5	ENSG00000133313		2	0	7923841845	8046292297	6434496365	10128765046	8174635315	5007711286	8578078502	8177746480	5996543515	4571951696	10552386646	12665027732	10708532843	7320660069	9872983657	5804958738	8309084924	8143252600
High	Master Protein	P02675	Fibrinogen beta chain OS=Homo sapiens OX=9606 GN=FGB PE=1 SV=2	0	656.216	67	38	8053	38	491	55.9	8.27	3259.82	3391.75	673.56	2759.27	4195.78	3789.87	34	33	27	32	35	33	2244	FGB	A0JLR9; B2R7G3; hsa:2244; P02675; Q32Q65; Q3KPF2	ENSG00000171564	Selenium micronutrient network; Folate metabolism; Blood clotting cascade; Complement system; VEGFA-VEGFR2 signaling; Fibrin complement receptor 3 signaling pathway; COVID-19, thrombosis and anticoagulation; Network map of SARS-CoV-2 signaling pathway; Complement and coagulation cascades	27	0	33667990107	3419052048	17341642657	2129107776	1235992081	6749265399	1804971091	2029559940	5680480027	1911356280	2544484957	1581640698	2080966658	4943010219	2978124463	3497223797	5458746508	3059192017
High	Master Protein	P07437	Tubulin beta chain OS=Homo sapiens OX=9606 GN=TUBB PE=1 SV=2	0	650.927	75	36	15991	6	444	49.6	4.89	4069.6	4834.63	1466.48	7524.29	7179.01	7975.59	29	30	26	33	32	34	203068	TUBB	hsa:203068; P05218; P07437; Q8WUC1; Q9CY33	ENSG00000183311; ENSG00000196230; ENSG00000224156; ENSG00000227739; ENSG00000229684; ENSG00000232421; ENSG00000232575; ENSG00000235067	Alzheimer's disease and miRNA effects; Pathogenic Escherichia coli infection; Parkin-ubiquitin proteasomal system pathway; Opioid receptor pathways; Alzheimer's disease	14	2	1896773347	2165021262	1539660727	1830855318	1243926438	1221335908	2068282374	1476748999	3.42965e+08	5.38272e+08	1382373235	1626721354	1875641670	3537524672	2259057884	3745745712	2574752186	7547331566
High	Master Protein	Q13885	Tubulin beta-2A chain OS=Homo sapiens OX=9606 GN=TUBB2A PE=1 SV=1	0	650.677	68	33	13091	2	445	49.9	4.89	3209.6	3908.34	1206.67	5986.68	5822.79	6855.84	28	29	26	31	32	33	7280	TUBB2A	hsa:7280; Q13885; Q6FGZ8; Q8IWR2	ENSG00000137267	Alzheimer's disease and miRNA effects; Pathogenic Escherichia coli infection; Parkin-ubiquitin proteasomal system pathway; Alzheimer's disease	34	10	4.8279e+08	423297459	6.67173e+08	6.6293e+08	3.60123e+08	3.88379e+08	4.53928e+08	3.76929e+08	2.07686e+08	2.37462e+08	3.95084e+08	4.22001e+08	4.74292e+08	609270274	5.85879e+08	7.21437e+08	6.51296e+08	1010880812
High	Master Protein	P25705	ATP synthase subunit alpha, mitochondrial OS=Homo sapiens OX=9606 GN=ATP5F1A PE=1 SV=1	0	649.896	71	55	20008	55	553	59.7	9.13	4965.71	5806.06	1762.27	8348.22	7364.91	8936.77	49	43	45	53	50	53	498	ATP5F1A	A8K092; B4DY56; hsa:498; K7ENP3; P25705; Q53XX6; Q8IXV2; Q96FB4; Q96HW2; Q96IR6; Q9BTV8	ENSG00000152234	Electron transport chain: OXPHOS system in mitochondria; 7q11.23 copy number variation syndrome; Oxidative phosphorylation	6	0	18023031771	17025008320	23116761837	26882795144	28662891771	23712637272	27932732874	23049014736	30561690683	15030225678	25181767220	31294919471	29727797037	16740342214	21772734045	11800557182	17513901370	22434492827
High	Master Protein	Q9BVA1	Tubulin beta-2B chain OS=Homo sapiens OX=9606 GN=TUBB2B PE=1 SV=1	0	649.164	68	33	12953	2	445	49.9	4.89	3159.57	3843.46	1193.01	5898.88	5704.11	6765.25	28	29	25	31	31	33	347733	TUBB2B	A8K068; hsa:347733; Q9BVA1	ENSG00000137285	Alzheimer's disease and miRNA effects; Pathogenic Escherichia coli infection; Parkin-ubiquitin proteasomal system pathway; Alzheimer's disease	34	0	8.9006e+07	2.36475e+07	7.68213e+07	1.14203e+08	1.40951e+07	4.18871e+07	2.15008e+07	1.17065e+08	1.29614e+08	5.27405e+07	1.20588e+07	1.00155e+08	1.04971e+08	8.27193e+07	1.01596e+08	3.18565e+07	1.1024e+08	4.47419e+07
High	Master Protein	P05023	Sodium/potassium-transporting ATPase subunit alpha-1 OS=Homo sapiens OX=9606 GN=ATP1A1 PE=1 SV=1	0	645.326	48	56	8327	37	1023	112.8	5.49	2559.98	2540.25	848.52	3880.74	3060.34	3871.02	51	43	37	49	47	49	476	ATP1A1	B2RBR6; B7Z2T5; B7Z3U6; F5H3A1; hsa:476; P05023; Q16689; Q6LDM4; Q9UCN1; Q9UJ20; Q9UJ21	ENSG00000163399	Pre-implantation embryo; Proximal tubule transport; Arsenic metabolism and reactive oxygen species generation	6	24	3527767891	5309106526	7203141611	7757008603	13421585181	10755864374	9257506313	10563834464	10114122140	7370547909	4815576689	6046756796	6430563621	7195771726	7351727263	5745858222	5272465655	5294026677
High	Master Protein	Q9HBL0	Tensin-1 OS=Homo sapiens OX=9606 GN=TNS1 PE=1 SV=3	0	636.2	48	69	4802	65	1839	196.9	8.16	1176.6	1664.69	406.28	1822.12	1725.49	2000.97	57	63	50	65	63	60	7145	TNS1	A0A804HI61; hsa:7145; Q4ZG71; Q6IPI5; Q9HBL0	ENSG00000079308	Integrin-mediated cell adhesion	1	4	2676501287	2627246538	1911300595	3065204920	1731342004	2315048243	2435007893	2509847658	2166386073	2022855212	2402366814	2499930647	2589675431	1975982841	2508456743	3266618113	2015883641	2813101659
High	Master Protein	Q00610	Clathrin heavy chain 1 OS=Homo sapiens OX=9606 GN=CLTC PE=1 SV=5	0	632.948	37	66	5870	66	1675	191.5	5.69	1327.57	1513.33	331.55	2318.65	2138.47	2717.64	48	50	41	54	59	60	1213	CLTC	D3DU00; hsa:1213; Q00610; Q6N0A0; Q86TF2	ENSG00000141367	Synaptic vesicle pathway; VEGFA-VEGFR2 signaling; Ebola virus infection in host; Fragile X syndrome; 7q11.23 copy number variation syndrome; Complement and coagulation cascades	25	0	1741434764	2611602419	2107170503	4038477763	2465885816	3012470489	3076638532	2693704659	3012927422	2484271423	2179797516	3378277197	2745830409	4238246326	4005558283	3008823792	2935557919	3240020841
High	Master Protein	P05165	Propionyl-CoA carboxylase alpha chain, mitochondrial OS=Homo sapiens OX=9606 GN=PCCA PE=1 SV=4	0	629.678	57	53	6533	53	728	80	7.52	1460.46	2000.83	504.21	2442	2166.67	3117.94	46	48	40	49	48	52	5095	PCCA	B4DKY8; B4DPF9; C9JPQ8; hsa:5095; P05165; Q15979; Q8WXQ7	ENSG00000175198	Primary ovarian insufficiency	4	0	2482127981	2210121408	3561936843	4702301702	5753887071	4068187960	4570092583	3896389667	4030200201	4153915855	3746607018	4858410674	3098958982	2448275392	3901050784	1496562724	2158219985	2015652895
High	Master Protein	P14618	Pyruvate kinase PKM OS=Homo sapiens OX=9606 GN=PKM PE=1 SV=4	0	625.605	81	46	7415	4	531	57.9	7.84	1819.69	1855.33	752.93	3390.13	3255.67	3465.94	40	39	32	40	41	42	5315	PKM	A6NFK3; B2R5N8; B3KRY0; B4DFX8; B4DUU6; hsa:5315; P14618; P14786; Q53GK4; Q96E76; Q9BWB5; Q9UCV6; Q9UPF2	ENSG00000067225	Photodynamic therapy-induced HIF-1 survival signaling; Amino acid metabolism; Clear cell renal cell carcinoma pathways; Metabolic reprogramming in colon cancer; Aerobic glycolysis; Glycolysis in senescence; Glucose metabolism in triple-negative breast cancer cells; Glycolysis and gluconeogenesis	9	50	4640923877	8559055914	5267148339	6398288819	4672667845	5940576745	5719206747	6777072200	7046961299	2977509633	4471783979	5668869488	6693908181	8733362384	7337039181	6537118688	7168005548	16659394988
High	Master Protein	Q14764	Major vault protein OS=Homo sapiens OX=9606 GN=MVP PE=1 SV=4	0	625.347	64	64	5060	64	893	99.3	5.48	1006.63	1044.89	244.41	1918.41	2300.34	2106.65	48	50	36	56	59	56	9961	MVP	hsa:9961; Q14764; Q96BG4; Q9BPW6; Q9BQT1; Q9UBD1	ENSG00000013364	16p11.2 proximal deletion syndrome	2	0	2057056174	2953776317	2204953551	2320989191	1818528069	2539486678	2426015017	2849241986	4332160590	2236868931	1912286455	2302803746	3215239419	4002763432	4278867033	3449800932	2470189137	5298140726
High	Master Protein	P24752	Acetyl-CoA acetyltransferase, mitochondrial OS=Homo sapiens OX=9606 GN=ACAT1 PE=1 SV=1	0	621.547	69	39	11683	39	427	45.2	8.85	3025.79	4002.47	1295.7	5448.68	5229.56	6306.54	36	35	33	36	36	37	38	ACAT1	B2R6H1; G3XAB4; hsa:38; P24752; Q96FG8	ENSG00000075239	Fatty acid beta-oxidation; Tryptophan metabolism; SARS-CoV-2 and COVID-19 pathway	6	0	14050513204	9688120346	20206535564	14797192822	19482150470	11784139129	18872977915	15885114766	11641427058	10402734885	15281237121	16186624224	11561342891	7043579679	14656189769	4953679010	9199359828	4352811260
High	Master Protein	Q05707	Collagen alpha-1(XIV) chain OS=Homo sapiens OX=9606 GN=COL14A1 PE=1 SV=3	0	618.823	41	70	5015	70	1796	193.4	5.3	944.65	1724.86	863.42	2057.56	1606.93	1254.72	53	62	54	62	63	57	7373	COL14A1	B2RU07; hsa:7373; O00260; O00261; O00262; Q05707; Q05708; Q5XJ18; Q96C67; Q9UDF6	ENSG00000187955		4	0	4146210701	4604474969	2434196293	3367484825	1021171776	6583840801	2124500082	5216408602	1989256051	1975419548	4832249781	1853266115	2809758605	3470628144	4315109525	6555501896	7060085016	4156412247
High	Master Protein	Q9P2E9	Ribosome-binding protein 1 OS=Homo sapiens OX=9606 GN=RRBP1 PE=1 SV=5	0	617.737	46	68	6342	7	1410	152.4	8.6	1519.98	1518.2	714.57	2951.43	3069.46	2884.04	54	51	48	59	63	61	6238	RRBP1	A0A0A0MRV0; A2A2S6; A6NCN6; hsa:6238; O75300; O75301; Q5W165; Q96SB2; Q9BWP1; Q9H476; Q9P2E9	ENSG00000125844	Ectoderm differentiation	2	66	2770415600	4242981304	3447294958	2965274499	3713259637	3652597543	4700779313	4988332801	6902341434	3312889053	4025274128	2809340961	4134616430	4496931964	4536764827	3935410403	3569529051	4224196411
High	Master Protein	P35908	Keratin, type II cytoskeletal 2 epidermal OS=Homo sapiens OX=9606 GN=KRT2 PE=1 SV=2	0	611.003	83	61	7889	44	639	65.4	8	2090.1	2650.76	487.67	3591.23	3203.5	2483.08	54	56	41	59	59	56	3849	KRT2	hsa:3849; P35908; Q4VAQ2	ENSG00000172867		2	10	2186995531	4614775029	1525685256	1841966718	5076487748	4970699841	3534958553	1377930196	2261699899	4205728945	7636653799	5710662523	9491169822	1433184777	2288677968	2527359625	4855252412	3076336806
High	Master Protein	P42704	Leucine-rich PPR motif-containing protein, mitochondrial OS=Homo sapiens OX=9606 GN=LRPPRC PE=1 SV=3	0	610.197	49	73	3741	73	1394	157.8	6.13	696.72	921.76	190.02	1283.03	1003.01	1690.38	52	55	38	60	61	67	10128	LRPPRC	A0PJE3; A8K1V1; hsa:10128; P42704; Q53PC0; Q53QN7; Q6ZUD8; Q7Z7A6; Q96D84	ENSG00000138095	Ciliary landscape	4	0	1206391890	1494931465	1214533334	2647278997	2618813679	2185268314	2056741065	2076682137	2260692618	2953035854	1859516838	2039514952	1312239668	1750812083	2040211993	1487877547	1257724952	2162019044
High	Master Protein	Q03154	Aminoacylase-1 OS=Homo sapiens OX=9606 GN=ACY1 PE=1 SV=1	0	608.155	87	39	13296	39	408	45.9	6.18	2688.43	3921.26	1163.26	4717.44	4944.77	5443.59	32	33	29	36	37	35	95	ACY1	C9J6I6; C9J9D8; C9JWD4; hsa:95; Q03154	ENSG00000243989	Thyroxine (thyroid hormone) production	4	0	14563369682	6326714239	11994099165	16849311851	8885241170	7925940713	9804445001	13017176579	9762091983	6803480719	12161550140	15885257312	11049176193	3982248236	11547026766	3377362614	9325071592	5884060287
High	Master Protein	Q14980-2	Isoform 2 of Nuclear mitotic apparatus protein 1 OS=Homo sapiens OX=9606 GN=NUMA1	0	595.789	44	81	2719	80	2101	236.4	5.8	569.41	719.87	157.55	1178.64	940.62	1227.79	57	59	36	73	67	69		NUMA1	Q14980-2			0	1	1217040659	1414274877	1312297202	1660594898	1518452878	1285117970	1927277726	2017481033	1486933167	1363581208	1458747455	1279777433	1400241754	1412457296	1588585693	1263145893	1589266848	1225068430
High	Master Protein	P06727	Apolipoprotein A-IV OS=Homo sapiens OX=9606 GN=APOA4 PE=1 SV=4	0	595.518	78	61	6987	61	396	45.3	5.38	1804.6	2176.51	899.51	3161.83	2125.52	1358.97	58	47	44	55	47	44	337	APOA4	A8MSL6; hsa:337; P06727; Q14CW8; Q6Q787	ENSG00000110244	Statin inhibition of cholesterol production; Familial hyperlipidemia type 1; Familial hyperlipidemia type 2; Familial hyperlipidemia type 3; Familial hyperlipidemia type 4; Familial hyperlipidemia type 5; Cholesterol metabolism; Cholesterol metabolism	13	0	6032618242	8473292749	9225440214	4875412240	14183102165	3390039756	10861599095	5106773247	3955176196	6241506506	5505720169	8726920927	10023731789	5549961750	6529080362	7872412795	14561413231	1817260631
High	Master Protein	P38606	V-type proton ATPase catalytic subunit A OS=Homo sapiens OX=9606 GN=ATP6V1A PE=1 SV=2	0	592.975	67	44	7872	44	617	68.3	5.52	1952.29	2194.15	531.77	2852.1	2754.99	4055.65	37	34	30	39	38	43	523	ATP6V1A	B2RBR8; B7Z1R5; D3DN75; hsa:523; P38606; Q53YD9; Q96DY6; Q9UHY3	ENSG00000114573	Proximal tubule transport	6	0	3347805416	3532765301	5069683356	5996243695	5938546596	4847832181	5840995231	3746033219	4186058050	5078448877	4770340245	7966907180	4799931505	3962086800	4409066967	2500556779	2864562420	2149642100
High	Master Protein	P0C0L5	Complement C4-B OS=Homo sapiens OX=9606 GN=C4B PE=1 SV=2	0	585.763	40	63	3648	4	1744	192.6	7.27	911.78	1001.25	385.47	1397.3	1776.5	773.32	51	47	45	57	60	44	100293534; 721	C4B; C4B_2	A2BHY4; hsa:100293534; hsa:721; P01028; P0C0L5; P78445; Q13160; Q13906; Q14033; Q14835; Q6U2E9; Q6U2G1; Q6U2I5; Q6U2L1; Q6U2L7; Q6U2L9; Q6U2M5; Q6VCV8; Q96SA7; Q9NPK5; Q9UIP5	ENSG00000224389; ENSG00000228267; ENSG00000228454; ENSG00000233312; ENSG00000236625	Allograft rejection; Oxidative damage response; Complement system in neuronal development and plasticity; Complement activation; Complement and coagulation cascades; Sudden infant death syndrome (SIDS) susceptibility pathways	9	69	2241735909	2748890107	1711075283	1169152538	7.36852e+08	1733668693	2024424531	1190559672	1673372063	2027091149	1711180486	1119139773	1553122632	2131141309	2498149531	2461669554	2436531101	2635630517
High	Master Protein	P48681	Nestin OS=Homo sapiens OX=9606 GN=NES PE=1 SV=2	0	585.421	43	66	3885	66	1621	177.3	4.36	998.64	851.05	188.56	1519.85	1590.6	1960.66	55	49	33	55	58	60	10763	NES	hsa:10763; O00552; P48681; Q3LIF5; Q5SYZ6	ENSG00000132688		0	0	1862243496	1780339164	1836619406	2495207501	2105306166	2172685320	1661251550	1846795428	2428430467	1923310234	3078395017	1737697744	2140656090	2310038458	1512424364	1396458336	1545526713	1086234878
High	Master Protein	P55084	Trifunctional enzyme subunit beta, mitochondrial OS=Homo sapiens OX=9606 GN=HADHB PE=1 SV=3	0	575.446	68	39	6793	39	474	51.3	9.41	1381.59	1664.02	556.5	2334.6	2136.95	3216.35	33	32	30	35	36	36	3032	HADHB	B2RB16; B4E2W0; hsa:3032; O14969; P55084; Q53TA6; Q96C77; Q9H3F5; Q9T2V8	ENSG00000138029	Fatty acid beta-oxidation; Valproic acid pathway; Female steroid hormones in cardiomyocyte energy metabolism; Sudden infant death syndrome (SIDS) susceptibility pathways	12	0	5250352006	4439149469	6881742917	6418177693	5540639265	4074657820	8338875409	4799218814	3776484120	5883646848	6744477709	7606819229	5747198512	3725659490	6480658309	3125972930	3902644440	2156019450
High	Master Protein	P11047	Laminin subunit gamma-1 OS=Homo sapiens OX=9606 GN=LAMC1 PE=1 SV=3	0	574.768	34	58	6447	56	1609	177.5	5.12	1413.82	1866	755.21	2878.27	2224.99	2476.38	43	39	41	50	52	51	3915	LAMC1	hsa:3915; P11047; Q5VYE7	ENSG00000135862	Alpha 6 beta 4 signaling pathway; Complement system; Endoderm differentiation; miRNA targets in ECM and membrane receptors; Focal adhesion; Focal adhesion: PI3K-Akt-mTOR-signaling pathway; PI3K-Akt signaling pathway; Inflammatory response pathway; Small cell lung cancer; Malignant pleural mesothelioma; Primary ovarian insufficiency	20	2	5658091496	5227659316	3750571235	4361280483	5001563840	6106382189	5687154059	5336194275	3560658078	3359651537	5510351911	4262616108	4936799136	4999846705	4531806500	5686871027	5862288442	5277189859
High	Master Protein	P02549	Spectrin alpha chain, erythrocytic 1 OS=Homo sapiens OX=9606 GN=SPTA1 PE=1 SV=5	0	574.479	39	83	750	83	2419	279.8	5.05	315.4	329.89	8.31	68.01	79.74	409.51	49	60	8	21	24	70	6708	SPTA1	hsa:6708; P02549; Q15514; Q5VYL1; Q5VYL2; Q6LDY5	ENSG00000163554		4	0	2547057071	4.42866e+08	7.85704e+08	3.39448e+08	8.87325e+08	1303830056	680900590	5.39095e+08	8.23599e+08	3.90884e+08	6.32423e+08	3.68097e+08	2.99956e+08	4.45831e+08	3.83009e+08	21370838756	2765275317	4.21162e+08
High	Master Protein	P46940	Ras GTPase-activating-like protein IQGAP1 OS=Homo sapiens OX=9606 GN=IQGAP1 PE=1 SV=1	0	573.983	48	74	3453	71	1657	189.1	6.48	641.33	732.9	246.44	1444.61	1299.13	1215.27	52	49	42	61	64	62	8826	IQGAP1	A7MBM3; hsa:8826; P46940	ENSG00000140575	VEGFA-VEGFR2 signaling; Ebola virus infection in host; Ciliary landscape; EGF/EGFR signaling pathway; Regulation of actin cytoskeleton; G13 signaling pathway	25	4	1161533156	2177960052	1091078211	1925040772	1604716733	1783591744	1505912736	2052063915	1852183039	1321084595	1197551340	1879334193	1850915140	3323992388	2319066055	3021757519	2144157553	2054502807
High	Master Protein	Q86UP2	Kinectin OS=Homo sapiens OX=9606 GN=KTN1 PE=1 SV=1	0	573.372	54	77	3494	77	1357	156.2	5.64	673.1	732.7	296.04	1288.79	1235.8	1534.46	56	52	50	67	66	69	3895	KTN1	B4DZ88; hsa:3895; Q13999; Q14707; Q15387; Q17RZ5; Q5GGW3; Q86UP2; Q86W57	ENSG00000126777	Glucocorticoid receptor pathway; Nuclear receptors meta-pathway	11	0	1969463899	2671741568	2118894578	2060503639	3020811922	2985807603	2525120815	3202881688	2191984870	2737995454	2336497340	2032074076	2492285854	2680974526	2673380436	2121346060	2307595913	1443125321
High	Master Protein	P21399	Cytoplasmic aconitate hydratase OS=Homo sapiens OX=9606 GN=ACO1 PE=1 SV=3	0	571.166	56	52	7096	52	889	98.3	6.68	1437.6	1591.59	359.7	2118.68	2327.38	2706.49	42	43	33	47	48	49	48	ACO1	D3DRK7; hsa:48; P21399; Q14652; Q5VZA7	ENSG00000122729	Iron metabolism in placenta; TCA cycle and deficiency of pyruvate dehydrogenase complex (PDHc)	3	0	2823731026	2132567217	1938419063	5224889124	2371106594	3197326370	2781198298	1947262161	2549831470	2546351347	3306519892	3260684059	2560542741	2672339797	3627087179	2172021506	2237871264	3659979405
High	Master Protein	P14618-2	Isoform M1 of Pyruvate kinase PKM OS=Homo sapiens OX=9606 GN=PKM	0	566.687	75	44	6675	2	531	58	7.71	1610.05	1564.83	649.03	2860.34	2828.99	3031.08	38	37	31	38	40	40		PKM	P14618-2			0	0	1.17651e+07	1.83251e+07	2.63247e+06	1.32932e+07		2.10171e+07	4.35425e+06	1.25281e+07	1.15563e+06	9.52289e+06	8.65916e+06	1.76236e+07	1.03007e+07	2.0289e+07	1.04815e+07	2.14383e+07	1.92372e+07	9.69107e+06
High	Master Protein	O60494	Cubilin OS=Homo sapiens OX=9606 GN=CUBN PE=1 SV=5	0	566.363	19	64	7525	64	3623	398.5	5.35	1638.42	1870.9	492.38	2493.19	2513.38	2718.94	53	52	38	55	57	60	8029	CUBN	B0YIZ4; hsa:8029; O60494; Q5VTA6; Q96RU9	ENSG00000107611	Vitamin B12 metabolism; Nephrotic syndrome	7	0	3533813060	3401101323	4721237651	5274625834	5349408419	5112079921	6738465953	4287428114	5348617825	4659642605	5814987113	4733895321	4342116404	4007890786	5571990755	2982331991	3078823125	4819898016
High	Master Protein	P0C0L4	Complement C4-A OS=Homo sapiens OX=9606 GN=C4A PE=1 SV=2	0	566.346	39	61	3496	2	1744	192.7	7.08	871.59	956.49	374.27	1348.5	1696.26	754.28	49	46	43	55	58	42	720; 721	C4A	A6H8M8; A6NHJ5; A7E2V2; B0QZR6; B0V2C8; B2RUT6; B7ZVZ6; hsa:720; hsa:721; P01028; P0C0L4; P78445; Q13160; Q13906; Q14033; Q14835; Q4LE82; Q5JNX2; Q5JQM8; Q6P4R1; Q6U2E5; Q6U2E8; Q6U2F0; Q6U2F3; Q6U2F4; Q6U2F6; Q6U2F8; Q6U2G0; Q96EG2; Q96SA8; Q9NPK5; Q9UIP5	ENSG00000206340; ENSG00000227746; ENSG00000244731	Allograft rejection; Complement system; Complement system in neuronal development and plasticity; Complement activation; Complement and coagulation cascades; Sudden infant death syndrome (SIDS) susceptibility pathways	11	0	2.7083e+07	3.38578e+06	2.14041e+06	434729	536208	751596	1.03609e+06	1.66513e+06	3.32127e+06	1.85791e+06	6.85121e+06	1.28502e+06	1.63075e+06	1.3166e+07	1.67914e+06	5.04785e+06	1.59665e+07	8.65605e+07
High	Master Protein	P07355	Annexin A2 OS=Homo sapiens OX=9606 GN=ANXA2 PE=1 SV=2	0	564.448	76	45	11248	45	339	38.6	7.75	2974.38	2935.48	1029.86	5182.08	5165.57	5013.15	38	36	32	44	43	38	302	ANXA2	hsa:302; P07355; Q567R4; Q6N0B3; Q8TBV2; Q96DD5; Q9UDH8	ENSG00000182718	Gastrin signaling pathway; CCL18 signaling pathway; Prostaglandin synthesis and regulation	7	0	8458904509	13410022201	7493619924	10953481526	9563487694	14376821071	7968604643	12005573493	10857583716	7288279529	8791913696	10086464996	11089967466	14937329425	11875448073	12941003153	12286312377	8427734957
High	Master Protein	P02647	Apolipoprotein A-I OS=Homo sapiens OX=9606 GN=APOA1 PE=1 SV=1	0	562.752	90	49	13526	48	267	30.8	5.76	3404.55	3832.44	1909.75	5386.96	6148.1	3353.95	41	39	34	44	47	34	335	APOA1	A8K866; hsa:335; P02647; Q6LDN9; Q6Q785; Q9UCS8; Q9UCT8	ENSG00000118137	Selenium micronutrient network; Vitamin B12 metabolism; Folate metabolism; Complement system; PPAR-alpha pathway; Nuclear receptors meta-pathway; PPAR signaling pathway; Statin inhibition of cholesterol production; Familial hyperlipidemia type 1; Familial hyperlipidemia type 2; Familial hyperlipidemia type 3; Familial hyperlipidemia type 4; Familial hyperlipidemia type 5; Cholesterol metabolism; …	32	1	15893573936	14345132938	25151937591	12690393788	5791965036	10008254982	13696368238	9898838783	10413479881	8127282562	8910436018	8095741344	10468835950	14325548136	8710367503	16849266259	20324496114	7584892702
High	Master Protein	P30101	Protein disulfide-isomerase A3 OS=Homo sapiens OX=9606 GN=PDIA3 PE=1 SV=4	0	554.176	73	51	13228	51	505	56.7	6.35	3212.51	3539.97	1325.68	5868.01	6028.26	5705.15	45	44	40	46	48	48	2923	PDIA3	hsa:2923; P30101; Q13453; Q14255; Q8IYF8; Q9UMU7	ENSG00000167004	Prion disease pathway	4	0	8475438841	7859086353	10892992273	7957123988	6919003083	8834850686	9403822865	9050797361	11600591529	6517246377	8168348069	7498627316	9389588324	8652643238	9613310664	8281893084	8009154318	6392908348
High	Master Protein	P09467	Fructose-1,6-bisphosphatase 1 OS=Homo sapiens OX=9606 GN=FBP1 PE=1 SV=5	0	549.461	67	32	9240	29	338	36.8	6.99	1856.67	2238.85	582.36	2939.58	2902.23	4935.54	28	28	28	31	29	30	2203	FBP1	hsa:2203; O75571; P09467; Q53F94; Q96E46	ENSG00000165140	Angiopoietin-like protein 8 regulatory pathway; Disorders of fructose metabolism; Glycolysis and gluconeogenesis	4	4	5009057406	2194923585	5506292827	10831353888	3329607672	2910811241	4245520185	5471303474	3671745636	1732414752	4659073814	6617310772	3413872730	2256856217	4641485783	5090874934	3461554577	5096649012
High	Master Protein	P01023	Alpha-2-macroglobulin OS=Homo sapiens OX=9606 GN=A2M PE=1 SV=3	0	547.702	42	62	3906	62	1474	163.2	6.46	1008.75	877	315.81	1566.22	1932.1	285.83	51	43	39	53	60	34	2	A2M	hsa:2; P01023; Q13677; Q59F47; Q5QTS0; Q68DN2; Q6PIY3; Q6PN97	ENSG00000175899	Complement system; Complement and coagulation cascades	6	0	1502425570	2707853643	8.60567e+08	1129995673	1079631693	3037191722	1201943015	877085942	1594213824	1242408079	1394175421	7.23452e+08	1180316169	3937651708	1967942219	4696090093	5898814157	2271275580
High	Master Protein	P68366	Tubulin alpha-4A chain OS=Homo sapiens OX=9606 GN=TUBA4A PE=1 SV=1	0	545.648	59	32	9490	9	448	49.9	5.06	2250.54	2724.64	755.68	3675.4	4075.78	4677.22	30	30	24	30	30	30	7277	TUBA4A	A8MUB1; B3KNQ6; hsa:7277; P05215; P68366	ENSG00000127824	Alzheimer's disease and miRNA effects; Pathogenic Escherichia coli infection; Parkin-ubiquitin proteasomal system pathway; Alzheimer's disease	41	0	6.26199e+08	7.97227e+08	7.35196e+08	9.1067e+08	1943321379	7.31623e+08	1364828693	7.02637e+08	3.02799e+08	425307651	1296707627	1207710103	6.24699e+08	6.91029e+08	8.11333e+08	6.1622e+08	8.9932e+08	2015445444
High	Master Protein	Q68CK6	Acyl-coenzyme A synthetase ACSM2B, mitochondrial OS=Homo sapiens OX=9606 GN=ACSM2B PE=1 SV=2	0	544.247	65	41	11026	12	577	64.2	8.25	2157.4	2411.82	538.93	3476.03	3057.13	4671.36	36	33	25	36	37	39	348158	ACSM2B	hsa:348158; Q68CK6; Q86YT1	ENSG00000066813		4	40	3493607797	4991028268	8510305944	9366088403	13561932132	8959839742	6377276104	6915236573	7461930310	15979030372	7377710014	8750819960	4705700599	4400061626	8034613678	2756166491	4253391436	4026523991
High	Master Protein	P49419-2	Isoform 2 of Alpha-aminoadipic semialdehyde dehydrogenase OS=Homo sapiens OX=9606 GN=ALDH7A1	0	543.182	68	42	6766	42	511	55.3	6.86	1564.99	2160.8	425.49	2596.13	2141.24	3585.6	38	36	27	37	39	40		ALDH7A1	P49419-2			0	0	3817021051	3839210969	4590214237	8262739865	7169539078	5276460690	5528509574	5455285263	6572740690	6294985150	5255363520	7445198861	3929364043	3148710654	5724545952	2664519721	3918537716	3549185692
High	Master Protein	Q3LXA3	Triokinase/FMN cyclase OS=Homo sapiens OX=9606 GN=TKFC PE=1 SV=2	0	542.86	64	37	5423	37	575	58.9	7.49	1367.65	2066.53	452.54	2696.1	1992.82	3232.23	25	27	21	34	31	32	26007	TKFC	hsa:26007; Q2L9C1; Q3LXA3; Q53EQ9; Q9BVA7; Q9H895	ENSG00000149476	Novel intracellular components of RIG-I-like receptor pathway	5	0	2165362115	1624202514	1886246708	4630286162	3632421389	1707969794	1919492605	2713487271	2566071517	2135870741	2350528001	3788926229	2103397947	1115351330	2414100215	6.61319e+08	1692253701	2596019483
High	Master Protein	P08473	Neprilysin OS=Homo sapiens OX=9606 GN=MME PE=1 SV=2	0	537.135	54	52	5518	52	750	85.5	5.73	1083.39	1596.31	211.15	1894.58	1314.96	2632.71	41	42	28	44	40	49	4311	MME	A8K6U6; D3DNJ9; hsa:4311; P08473; Q3MIX4	ENSG00000196549	Alzheimer's disease and miRNA effects; Primary focal segmental glomerulosclerosis (FSGS); Alzheimer's disease	6	0	3310785399	3606062811	3786638647	4717834064	4949770432	4324485238	5336001548	3880009264	3171497258	5040314221	4423703086	4753578907	2357289407	2236612767	4517974233	1556717216	2419264931	2283729994
High	Master Protein	Q02218	2-oxoglutarate dehydrogenase complex component E1 OS=Homo sapiens OX=9606 GN=OGDH PE=1 SV=3	0	535.527	49	56	6300	46	1023	115.9	6.86	1364.8	1664.02	429.27	2091.53	1926.29	2889.01	46	45	36	44	46	53	4967	OGDH	B4E2U9; D3DVL0; E9PBM1; hsa:4967; Q02218; Q96DD3; Q9UDX0	ENSG00000105953	TCA cycle and deficiency of pyruvate dehydrogenase complex (PDHc); Amino acid metabolism; Thiamine metabolic pathways; 7q11.23 copy number variation syndrome; TCA cycle (aka Krebs or citric acid cycle)	8	0	1613391597	1646155992	2205936186	2649681918	2674506335	1672438250	1946442722	1802044503	1757029605	1602878131	2431380719	3098572396	2332818144	1762538158	2376590107	2945908766	1980671320	1298039674
High	Master Protein	P35241	Radixin OS=Homo sapiens OX=9606 GN=RDX PE=1 SV=1	0	530.828	68	59	9275	40	583	68.5	6.37	1930.7	2207.6	610.85	3063.05	2952.97	3409.91	47	45	38	52	52	57	5962	RDX	A7YIJ8; A7YIK0; A7YIK3; B7Z9U6; F5H1A7; hsa:5962; P35241; Q86Y61	ENSG00000137710	Regulation of actin cytoskeleton	4	0	1432742348	1726130757	1874669150	2264386768	2630138980	1451461743	2451481374	2182376069	2069223775	2779311882	2339264363	2323920176	1593838911	1202541126	2022633452	1160921381	1428147669	1933501825
High	Master Protein	P52272	Heterogeneous nuclear ribonucleoprotein M OS=Homo sapiens OX=9606 GN=HNRNPM PE=1 SV=3	0	530.522	67	51	7396	51	730	77.5	8.7	1531.98	1628.29	515.93	2783.51	2801.28	2510.14	40	37	34	46	50	46	4670	HNRNPM	hsa:4670; P52272; Q15584; Q8WZ44; Q96H56; Q9BWL9; Q9Y492	ENSG00000099783	mRNA processing	4	0	3025227847	4094004460	3762526616	3620058339	4799763336	5370647841	4024240544	4734764209	5918476787	3850903403	3698588808	4365339039	5522723196	4094925340	4312506059	4023942956	4688043270	4817691508
High	Master Protein	Q03252	Lamin-B2 OS=Homo sapiens OX=9606 GN=LMNB2 PE=1 SV=4	0	527.198	68	66	6159	58	620	69.9	5.59	1366.62	1584.91	545.03	2229.36	1960.89	2221.17	53	50	45	59	61	56	84823	LMNB2	hsa:84823; O75292; Q03252; Q14734; Q96DF6	ENSG00000176619	Gastric cancer network 2; Fas ligand pathway and stress induction of heat shock proteins; IL-18 signaling pathway; Familial partial lipodystrophy; Progeria-associated lipodystrophy; Acquired partial lipodystrophy / Barraquer-Simons syndrome	6	6	3521194281	5076339925	4331400457	3336715846	4058288833	4211354135	5650250296	6337048611	6740283477	8521703303	4880900878	4279071541	4948339988	4483025815	4331859430	3729259619	5753739994	2856162877
High	Master Protein	O75891	Cytosolic 10-formyltetrahydrofolate dehydrogenase OS=Homo sapiens OX=9606 GN=ALDH1L1 PE=1 SV=2	0	524.847	57	51	6072	51	902	98.8	5.94	1348.96	1763.07	409.97	2266.53	2090.27	2952.03	42	42	36	46	45	48	10840	ALDH1L1	B4DG36; E9PBX3; hsa:10840; O75891; Q68CS1; Q8TBP8	ENSG00000144908	Folate-alcohol and cancer pathway hypotheses; One-carbon metabolism	3	0	3240435878	3198061099	2308664632	5133127935	3308064563	2469715039	3253876364	3015277280	2276964458	3148516509	4164963440	4874834237	2581677519	2868335969	3715118181	1879921382	2447391734	2923037563
High	Master Protein	P08729	Keratin, type II cytoskeletal 7 OS=Homo sapiens OX=9606 GN=KRT7 PE=1 SV=5	0	522.409	77	61	6435	46	469	51.4	5.48	1045.85	1126.06	657.84	2137.61	2680.6	1775.09	46	38	41	47	61	47	3855	KRT7	hsa:3855; P08729; Q92676; Q9BUD8; Q9Y3R7	ENSG00000135480		2	7	2139931303	2199145452	1357134782	2143899621	1004464779	1352700665	1708326758	2772872998	1804016477	7.32565e+08	1335787797	1861602234	2492483622	2501621092	2891343642	3794819742	3551101278	2530946512
High	Master Protein	O95831	Apoptosis-inducing factor 1, mitochondrial OS=Homo sapiens OX=9606 GN=AIFM1 PE=1 SV=1	0	521.089	57	37	7897	37	613	66.9	8.95	1899.85	2316.56	591.53	3192.69	2759.96	3968.55	34	33	28	32	35	36	9131	AIFM1	A4QPB4; B1ALN1; B2RB08; D3DTE9; E9PRR0; hsa:9131; O95831; Q1L6K4; Q1L6K6; Q2QKE4; Q5JUZ7; Q6I9X6; Q9Y3I3; Q9Y3I4	ENSG00000156709	Apoptosis modulation and signaling; Nanomaterial induced apoptosis; Apoptosis modulation by HSP70	3	0	5042754819	4431608280	6143064251	8064095393	7790319990	4038402717	7601684517	6016966850	5582830523	5682876749	6999367269	8538088074	6645797054	4824556851	7095238498	3392721039	3893287654	5051304358
High	Master Protein	Q9Y2J2-2	Isoform 2 of Band 4.1-like protein 3 OS=Homo sapiens OX=9606 GN=EPB41L3	0	520.09	56	54	3657	5	865	96.5	5.43	939.84	1260.52	266.7	1613.44	1383.65	2239.09	40	40	33	43	44	53		EPB41L3	Q9Y2J2-2			0	52	3238765815	2619568801	2803523841	3522545282	6086594633	4414894271	3175613052	4145688617	5498525347	2807675026	3870450160	2854805107	2205669379	2594812518	3560960348	1306104773	1817711063	8.42556e+08
High	Master Protein	Q01995	Transgelin OS=Homo sapiens OX=9606 GN=TAGLN PE=1 SV=4	0	519.308	97	33	9658	32	201	22.6	8.84	2693.22	3150.23	1091.34	3491.9	3763.61	2933.95	30	31	25	30	31	30	6876	TAGLN	hsa:6876; O15542; Q01995	ENSG00000149591	Burn wound healing	1	2	21234488436	17335071743	9779536550	12418872237	7180666215	7608572038	6314810909	11446938068	11137068940	7229104590	5215614700	7970900033	6288556861	7166081746	6104644893	15448137007	9940160579	4835207673
High	Master Protein	P08779	Keratin, type I cytoskeletal 16 OS=Homo sapiens OX=9606 GN=KRT16 PE=1 SV=4	0	517.504	71	46	5414	25	473	51.2	5.05	1181.47	1487.8	283.48	1843.43	2350.98	1928.34	33	38	17	33	43	42	3868	KRT16	A8K488; hsa:3868; P08779; P30654; Q16402; Q9UBG8	ENSG00000186832	Vitamin D receptor pathway	3	0	3.95129e+08	1213176375	3.38761e+08	4.46235e+08	3.84625e+08	3.38052e+08	3.8907e+08	234773231	3.82558e+08	2.21211e+08	1516199744	7.1008e+08	1235993571	4.51157e+08	2.82222e+08	1.7388e+08	5.13558e+08	4.5384e+08
High	Master Protein	P49411	Elongation factor Tu, mitochondrial OS=Homo sapiens OX=9606 GN=TUFM PE=1 SV=3	0	511.742	75	38	6696	38	455	49.8	7.61	1526.19	2031.15	585.47	2839.02	2454.29	3443.24	30	28	27	34	31	36	7284	TUFM	hsa:7284; O15276; P49411	ENSG00000178952	16p11.2 distal deletion syndrome	3	0	6168235702	5513108623	7419667430	8726199177	8897476233	6106772333	8202931523	7894767900	5799455589	4653146823	7537820970	6881091644	5808326144	5034812078	6670644395	3422883082	4922324458	4419813538
High	Master Protein	O75874	Isocitrate dehydrogenase [NADP] cytoplasmic OS=Homo sapiens OX=9606 GN=IDH1 PE=1 SV=2	0	506.947	70	37	7061	35	414	46.6	7.01	1434.19	1770.99	453.81	2311.89	2425.68	3029.95	33	32	25	33	30	34	3417	IDH1	hsa:3417; O75874; Q567U4; Q6FHQ6; Q7Z3V0; Q93090; Q9NTJ9; Q9UKW8	ENSG00000138413	Glutathione metabolism; TCA cycle and deficiency of pyruvate dehydrogenase complex (PDHc); Amino acid metabolism	8	0	5299105608	3133813312	5517193613	7665058843	4587639804	3450846193	4896906508	3679964232	4752718473	3157639233	6010663232	7397406035	4110135605	2813348503	3583719015	2451370594	3541204603	3456247363
High	Master Protein	P13667	Protein disulfide-isomerase A4 OS=Homo sapiens OX=9606 GN=PDIA4 PE=1 SV=2	0	504.908	63	51	5203	51	645	72.9	5.07	958.77	1129.73	441.45	1859.85	1790.29	1812.02	43	42	41	48	49	47	9601	PDIA4	A8K4K6; hsa:9601; P13667; Q549T6	ENSG00000155660		0	0	3617841226	4444365406	3087164677	2912057349	4629902665	3105795953	3923517378	3775070245	3751784138	3527646612	3477199045	3533298404	4063386665	4538712473	4308607583	3550607547	3440279006	4018831588
High	Master Protein	Q08AH3	Acyl-coenzyme A synthetase ACSM2A, mitochondrial OS=Homo sapiens OX=9606 GN=ACSM2A PE=1 SV=2	0	504.005	68	38	9919	9	577	64.2	8.09	1891.95	2172.42	454.78	2892.45	2659.81	4046.19	34	31	26	34	36	38	123876	ACSM2A	B3KTT9; hsa:123876; O75202; Q08AH3	ENSG00000183747		2	0	4.09039e+08	518049848	4.7995e+08	1160298356	6.27592e+08	4.9111e+08	4.91443e+08	255695593	5.55291e+08	5.28587e+08	3.4116e+08	2.6321e+08	3.05658e+08	4.54702e+08	8.03724e+08	6.95953e+07	4.62291e+08	217742765
High	Master Protein	P13639	Elongation factor 2 OS=Homo sapiens OX=9606 GN=EEF2 PE=1 SV=4	0	502.704	50	51	5226	49	858	95.3	6.83	1118.79	1131.78	273.53	1821.02	1807	2094.04	42	36	32	45	44	47	1938	EEF2	A0A384N6H1; B2RMP5; D6W618; hsa:1938; P13639; Q58J86	ENSG00000167658	Translation factors; AMP-activated protein kinase signaling; Brain-derived neurotrophic factor (BDNF) signaling pathway; IL-18 signaling pathway	9	2	2073487557	3719496029	2282155207	2940443822	2254608040	3111823284	2854012220	2688793190	4870910238	3254573878	2690490248	3031299943	3075926992	4610437938	3532473761	3697771286	3394136557	2783012273
High	Master Protein	P02533	Keratin, type I cytoskeletal 14 OS=Homo sapiens OX=9606 GN=KRT14 PE=1 SV=4	0	497.012	76	52	6040	19	472	51.5	5.16	1390.6	1786.83	344.04	2219.52	2526.02	1973.72	37	45	24	37	45	46	3861	KRT14	hsa:3861; P02533; Q14715; Q53XY3; Q9BUE3; Q9UBN2; Q9UBN3; Q9UCY4	ENSG00000186847	Corticotropin-releasing hormone signaling pathway	4	27	3058261608	6173110694	2897208552	2338533992	4517642085	8490245714	4685831362	2145137894	3394388728	8196926777	8201850409	5922094614	9961526804	3189713246	3150747301	11299450613	4722035360	2123486751
High	Master Protein	P48735	Isocitrate dehydrogenase [NADP], mitochondrial OS=Homo sapiens OX=9606 GN=IDH2 PE=1 SV=2	0	495.208	66	41	10630	39	452	50.9	8.69	2541.3	2604.17	878.28	3666.02	3424.27	4628.59	37	35	32	38	37	37	3418	IDH2	B2R6L6; B4DFL2; hsa:3418; P48735; Q96GT3	ENSG00000182054	VEGFA-VEGFR2 signaling; Metabolic reprogramming in colon cancer; Cerebral organic acidurias, including diseases; TCA cycle (aka Krebs or citric acid cycle)	6	2	6805577180	4589084761	14079799209	14825708415	8172510292	9787788144	10740350935	10086548539	17108610878	6104540259	7668011644	10908151632	9107302013	4307899605	5399030475	3313250989	4381956612	8170023030
High	Master Protein	P00450	Ceruloplasmin OS=Homo sapiens OX=9606 GN=CP PE=1 SV=1	0	494.899	47	45	2487	45	1065	122.1	5.72	506.26	636.43	400.72	845.54	1332.86	254.71	29	33	33	39	41	30	1356	CP	hsa:1356; P00450; Q14063; Q2PP18; Q9UKS4	ENSG00000047457	Ferroptosis; Neurodegeneration with brain iron accumulation (NBIA) subtypes pathway	8	0	1658650736	2241688189	1456316245	1318129914	1103084617	1555758613	9.17432e+08	1196960903	7.98301e+08	1020598197	1081099947	6.35402e+08	1132741111	3507095443	1444536064	2034296224	2562029550	9.72032e+08
High	Master Protein	P13645	Keratin, type I cytoskeletal 10 OS=Homo sapiens OX=9606 GN=KRT10 PE=1 SV=6	0	493.158	64	48	10786	39	584	58.8	5.21	2910.4	3472.73	870.48	4684.29	4231.45	3339.79	38	42	29	45	45	43	3858	KRT10	hsa:3858; P13645; Q14664; Q8N175	ENSG00000186395		2	3	7888857195	17697004869	2802556942	5334247225	18469891888	30944602953	16870535525	5444203094	8425457434	9506140011	25215351005	17212709087	30053477814	5502428561	8728352036	10798824752	16592029937	4356874397
High	Master Protein	P35221	Catenin alpha-1 OS=Homo sapiens OX=9606 GN=CTNNA1 PE=1 SV=1	0	490.08	54	50	2647	41	906	100	6.29	676.12	827.26	185.28	1197.64	1087.43	1494.7	35	38	23	39	41	45	1495	CTNNA1	hsa:1495; P35221; Q12795; Q8N1C0	ENSG00000044115	Arrhythmogenic right ventricular cardiomyopathy; Apoptosis-related network due to altered Notch3 in ovarian cancer; VEGFA-VEGFR2 signaling; White fat cell differentiation; Endometrial cancer; Mechanoregulation and pathology of YAP/TAZ via Hippo and non-Hippo mechanisms; Hippo-Merlin signaling dysregulation; Malignant pleural mesothelioma	12	9	2107700568	2692141500	1451629003	2619155905	3893337339	2866519848	2013075443	2526802078	1955938222	1597563479	2540035939	2825072524	2546454462	3040876357	3410867038	2202299952	2589257188	1782713315
High	Master Protein	P80404	4-aminobutyrate aminotransferase, mitochondrial OS=Homo sapiens OX=9606 GN=ABAT PE=1 SV=3	0	489.842	66	38	4510	38	500	56.4	7.96	649.22	1027.89	199.67	1124.16	932.5	1978.84	34	31	23	31	34	36	18	ABAT	A8K386; hsa:18; P80404; Q16260; Q8N5W2; Q96BG2; Q99800	ENSG00000183044	Alanine and aspartate metabolism; Valproic acid pathway; Fragile X syndrome	4	0	1411738968	1090826221	2026254525	3317502240	1541946203	1210690875	2083674346	1917717450	1617041360	1419071867	1861750563	3014175086	1443849506	6.55195e+08	1724675712	5.19246e+08	9.12495e+08	8.09621e+08
High	Master Protein	P08263	Glutathione S-transferase A1 OS=Homo sapiens OX=9606 GN=GSTA1 PE=1 SV=3	0	485.672	68	35	9463	8	222	25.6	8.88	1737.12	1997.07	516.34	2785.47	2162.27	3943.13	28	29	26	35	28	31	2938	GSTA1	hsa:2938; P08263; Q14750; Q5GHF8; Q5SZC1	ENSG00000243955	Glutathione metabolism; Nuclear receptors meta-pathway; NRF2 pathway; FOXA2 pathway; Estrogen metabolism; Metapathway biotransformation Phase I and II	10	37	18367044145	9865910562	24827686173	25974233087	25323734102	7713473760	27956006068	11157958468	27938353098	129000000000	22413751509	37021660765	10392800546	4250866618	7342065054	23821928345	14088240801	3435983362
High	Master Protein	P30084	Enoyl-CoA hydratase, mitochondrial OS=Homo sapiens OX=9606 GN=ECHS1 PE=1 SV=4	0	485.669	70	28	13352	28	290	31.4	8.07	3182.62	3763.57	1190.66	4899.18	5094.51	6669.63	23	23	23	25	26	28	1892	ECHS1	hsa:1892; O00739; P30084; Q5VWY1; Q96H54	ENSG00000127884	Fatty acid beta-oxidation; Fatty acid biosynthesis; Ciliary landscape; Tryptophan metabolism	10	0	9459306338	4444965255	15503837037	17705178691	10133133458	6432347622	14740467795	10365922494	9028224496	9185199041	9579557876	11252335360	5791219419	4037626546	9740275756	3823570115	4342994385	10254630437
High	Master Protein	P49748	Very long-chain specific acyl-CoA dehydrogenase, mitochondrial OS=Homo sapiens OX=9606 GN=ACADVL PE=1 SV=1	0	482.217	64	44	5986	44	655	70.3	8.75	1250.67	1498.1	470.14	2212.34	2041.16	2726.44	37	33	31	40	37	42	37	ACADVL	B4DEB6; F5H2A9; hsa:37; O76056; P49748; Q8WUL0	ENSG00000072778	Fatty acid beta-oxidation; Mitochondrial long chain fatty acid beta-oxidation	4	0	2180025395	2515921935	2127739194	4410903754	3615938552	3667134979	5173057043	3480440781	3086489038	2867616677	3324031526	4048226013	2976991250	2719261303	3751911381	3821670513	2002023939	3506441105
High	Master Protein	P06396-2	Isoform 2 of Gelsolin OS=Homo sapiens OX=9606 GN=GSN	0	480.466	57	41	6360	2	731	80.6	5.85	1458.41	2010.27	730.53	2839.1	2646.18	2670.95	34	34	32	38	39	38		GSN	P06396-2			0	46	7168557862	6822023499	5311140894	5323557064	4363242685	5893488441	5359247708	5765987771	3020790549	3656638030	5543441310	4919914661	6142543661	6432814315	5217512459	8146810617	8609297807	11026744371
High	Master Protein	P22314	Ubiquitin-like modifier-activating enzyme 1 OS=Homo sapiens OX=9606 GN=UBA1 PE=1 SV=3	0	480.379	47	46	5413	46	1058	117.8	5.76	1183.33	1565.52	466.59	2358.52	2206.73	2869.47	40	37	30	39	38	46	7317	UBA1	hsa:7317; P22314; Q5JRR8; Q96E13	ENSG00000130985	Proteasome degradation; Parkin-ubiquitin proteasomal system pathway; Parkinson's disease pathway	5	0	2048111666	2242664231	1562903913	3328497119	1763946562	2039821478	1935808379	1852585759	2233465409	1964330057	2010801614	1937851694	1614714639	3123152274	2565703546	2894903350	2244713611	4798760390
High	Master Protein	P12109	Collagen alpha-1(VI) chain OS=Homo sapiens OX=9606 GN=COL6A1 PE=1 SV=3	0	480.25	35	43	7128	43	1028	108.5	5.43	2028.44	2356.31	808.01	3399.3	2653.48	2413.07	42	39	35	41	40	39	1291	COL6A1	hsa:1291; O00117; O00118; P12109; Q14040; Q14041; Q16258; Q7Z645; Q9BSA8	ENSG00000142156	miRNA targets in ECM and membrane receptors; PI3K-Akt signaling pathway	10	0	5718565177	6450165179	4263819491	4886383287	1798810191	5014558099	5910967735	5770168240	6210093208	2314550018	4719950822	5301695302	5141574777	5400910320	5742067550	6307268652	5604426098	5675409297
High	Master Protein	P09651	Heterogeneous nuclear ribonucleoprotein A1 OS=Homo sapiens OX=9606 GN=HNRNPA1 PE=1 SV=5	0	478.348	58	37	6729	32	372	38.7	9.13	1731.02	1864.01	739.86	3088.42	3037.52	3250.94	30	30	25	34	36	32	3178	HNRNPA1	A8K4Z8; hsa:3178; P09651; Q3MIB7; Q6PJZ7	ENSG00000135486	mRNA processing	6	0	2450851904	2721759748	3757805833	3413188151	2051837702	2739465949	4483489285	3949855191	4496473020	1573375076	2362422986	2461189167	3165618717	2959579966	4636890197	3395897236	2799931815	2187510606
High	Master Protein	Q9ULD0	2-oxoglutarate dehydrogenase-like, mitochondrial OS=Homo sapiens OX=9606 GN=OGDHL PE=1 SV=3	0	477.999	53	59	4255	49	1010	114.4	6.65	815.04	956.25	245.88	1162.13	1100.7	1805.45	42	41	28	45	45	54	55753	OGDHL	A8K2G1; B4DKG2; B4E193; hsa:55753; Q8TAN9; Q9NVA0; Q9ULD0	ENSG00000197444	10q11.21q11.23 copy number variation syndrome	1	10	1359622422	1280153924	1458834765	2402647222	3654190213	1926649988	2948162696	2080614721	1773030210	1723744963	2208984225	2510548620	1985500482	1351335091	1757250183	8.01674e+08	1077221173	1487897707
High	Master Protein	P09210	Glutathione S-transferase A2 OS=Homo sapiens OX=9606 GN=GSTA2 PE=1 SV=4	0	477.697	71	34	9569	7	222	25.6	8.59	1756.59	2031.65	527.44	2816	2217.01	3966.43	27	29	25	33	28	27	2939	GSTA2	hsa:2939; P09210; Q12759; Q16491; Q9NTY6	ENSG00000244067	Aryl hydrocarbon receptor pathway; Constitutive androstane receptor pathway; Pregnane X receptor pathway; Nuclear receptors meta-pathway; NRF2 pathway; Transcriptional activation by NRF2 in response to phytochemicals; NRF2-ARE regulation; FOXA2 pathway; Antiviral and anti-inflammatory effects of Nrf2 on SARS-CoV-2 pathway; Metapathway biotransformation Phase I and II	13	0	1611982271	4.80336e+08	1180538033	1432986264	2467457095	8.32741e+08	9.67275e+08	1394894172	7.53329e+08	1073350317	6.86888e+08	3807189557	9.77592e+08	2.83399e+08	5.79702e+08	2.0803e+08	7.21275e+08	1.77013e+08
High	Master Protein	Q14697	Neutral alpha-glucosidase AB OS=Homo sapiens OX=9606 GN=GANAB PE=1 SV=3	0	476.829	51	44	3549	2	944	106.8	6.14	765.64	853.1	219.25	1332.57	1226.82	1594.11	37	35	29	42	41	43	23193	GANAB	A6NC20; hsa:23193; Q14697; Q8WTS9; Q9P0X0	ENSG00000089597	N-glycan biosynthesis	5	0	1.29948e+08	1.66768e+08	1.88004e+08	1.52702e+08	7.33646e+07	6.95616e+07	1.78599e+08	2.98456e+08	3.34303e+08	1.50545e+08	9.5777e+07	7.04728e+07	7.82222e+07	1.61604e+08	1.39669e+08	8.55415e+07	7.12559e+07	1.28198e+08
High	Master Protein	P09493-10	Isoform 10 of Tropomyosin alpha-1 chain OS=Homo sapiens OX=9606 GN=TPM1	0	475.669	79	46	4804	9	284	32.8	4.77	1296.96	1475.67	617.2	2025.4	1846.34	1553.85	43	39	36	41	42	39		TPM1	P09493-10			0	2	574566771	6.10692e+08	8.54183e+08	3.4013e+08	8.14642e+08	4.06457e+08	5.80141e+08	7.89212e+08	9.05754e+08	6.53691e+08	4.64953e+08	4.37644e+08	4.83164e+08	4.89663e+08	4.79684e+08	4.04914e+08	4.9172e+08	3.56568e+08
High	Master Protein	P28838-2	Isoform 2 of Cytosol aminopeptidase OS=Homo sapiens OX=9606 GN=LAP3	0	474.749	68	40	5448	40	488	52.7	6.74	1202.82	1455.69	432.78	2025.1	2092.21	2452.16	32	31	26	36	38	36		LAP3	P28838-2			0	0	3412701142	3506921767	4637747892	3749606057	3188411894	2518119747	3702950893	2683834045	3162159559	1561075203	3696552827	3981749989	4152363350	4457992228	3756674832	3114813167	2840566710	2339107093
High	Master Protein	P04350	Tubulin beta-4A chain OS=Homo sapiens OX=9606 GN=TUBB4A PE=1 SV=2	0	473.951	75	30	13835	5	444	49.6	4.88	3457.85	4146.99	1275.42	6010.95	5845.36	6829.03	22	26	21	28	26	26	10382	TUBB4A	B3KQP4; hsa:10382; P04350; Q969E5	ENSG00000104833	Alzheimer's disease and miRNA effects; Pathogenic Escherichia coli infection; Parkin-ubiquitin proteasomal system pathway; Alzheimer's disease	40	2	8.73079e+07	6.20199e+07	2.68458e+07	4.02773e+08	3.55297e+07	7.50753e+07	1.3649e+08	1.71517e+07	2.85333e+07	1.36285e+07	114674870	4.64698e+08	7.41528e+07	1.2665e+08	1.53364e+08	6.95902e+07	2.0469e+08	3.25729e+08
High	Master Protein	Q16836	Hydroxyacyl-coenzyme A dehydrogenase, mitochondrial OS=Homo sapiens OX=9606 GN=HADH PE=1 SV=3	0	473.308	86	27	6141	26	314	34.3	8.85	1075.97	1414.01	350.56	1921.15	1576.28	2557.22	23	23	21	24	26	27	3033	HADH	hsa:3033; J3KQ17; O00324; O00397; O00753; Q16836; Q4W5B4	ENSG00000138796	Fatty acid beta-oxidation; Fatty acid biosynthesis; Mitochondrial long chain fatty acid beta-oxidation; Amino acid metabolism; IL-18 signaling pathway; Mitochondrial fatty acid oxidation disorders	11	1	2697018597	1575516897	2790207496	5664729085	2981701740	2248054289	5202009460	3032469081	4332389633	2392124694	4090279696	5325567170	2967740448	1503297459	2871662709	9.67388e+08	2125541174	1962315842
High	Master Protein	P07237	Protein disulfide-isomerase OS=Homo sapiens OX=9606 GN=P4HB PE=1 SV=3	0	473.21	77	50	9139	50	508	57.1	4.87	1645.71	1866.86	702.01	2964.35	3177.58	2980.31	42	41	39	45	48	44	5034	P4HB	B2RDQ2; hsa:5034; P07237; P30037; P32079; Q15205; Q6LDE5	ENSG00000185624	VEGFA-VEGFR2 signaling; Type I collagen synthesis in the context of osteogenesis imperfecta	13	0	9545850531	8688432966	7938283852	6210608842	5395241233	6211789924	7465868855	8218898044	9003941703	5800006834	7155194203	4936340584	5931964718	7934272593	8143133144	8974118155	5959040655	6942789261
High	Master Protein	P29401	Transketolase OS=Homo sapiens OX=9606 GN=TKT PE=1 SV=3	0	470.053	59	41	5110	41	623	67.8	7.66	959.86	1127.53	328.54	1716.59	1730.08	2174.62	32	37	28	37	38	39	7086	TKT	A8K089; B4DE31; E7EPA7; hsa:7086; P29401; Q8TBA3; Q96HH3	ENSG00000163931	Pentose phosphate metabolism; VEGFA-VEGFR2 signaling; Metabolic reprogramming in colon cancer; Thiamine metabolic pathways	7	0	2013228565	4575488186	1871340970	3155993266	2613972467	2970856904	3326571481	3715212732	3796240319	2627844880	3443604330	3812456510	4384045821	4501343410	3744963701	2236049281	3678355020	2862675602
High	Master Protein	Q14247	Src substrate cortactin OS=Homo sapiens OX=9606 GN=CTTN PE=1 SV=2	0	469.618	66	51	4533	6	550	61.5	5.4	822.43	937.3	421.25	1461.14	1758.84	1617.88	44	44	39	48	50	46	2017	CTTN	hsa:2017; Q14247; Q8N707; Q96H99	ENSG00000085733; ENSG00000288401	Pathogenic Escherichia coli infection; Hepatitis C and hepatocellular carcinoma	4	50	2610448251	2986913123	3078617590	2416607488	4362852014	4517072306	4190165832	3940040446	3655054869	3901701836	3557020823	2803299314	3589662232	3296369280	2909619703	2872482390	2284751599	1543831757
High	Master Protein	P35558	Phosphoenolpyruvate carboxykinase, cytosolic [GTP] OS=Homo sapiens OX=9606 GN=PCK1 PE=1 SV=3	0	466.917	63	37	4366	34	622	69.2	6.14	753.9	1006.18	346.73	1377.05	1562.96	2181.23	30	29	31	33	32	34	5105	PCK1	A8K437; B4DT64; hsa:5105; P35558; Q8TCA3; Q9UJD2	ENSG00000124253	Adipogenesis; TCA cycle and deficiency of pyruvate dehydrogenase complex (PDHc); Estrogen receptor pathway; Nuclear receptors meta-pathway; Angiopoietin-like protein 8 regulatory pathway; Amino acid metabolism; PPAR signaling pathway; PI3K-Akt signaling pathway; Glycolysis and gluconeogenesis	14	0	2493252378	1926717583	3547716385	3621337941	4543949847	3396152403	1659044830	3360769456	9.41281e+08	3828725361	3572989739	4346678686	4385165898	2048912354	4397500436	1157656582	1575570762	1794898993
High	Master Protein	Q96I99	Succinate--CoA ligase [GDP-forming] subunit beta, mitochondrial OS=Homo sapiens OX=9606 GN=SUCLG2 PE=1 SV=2	0	464.536	66	40	8387	40	432	46.5	6.39	1714.83	2141.63	709.24	3189.17	2850.86	3851.69	34	32	30	38	34	36	8801	SUCLG2	C9JVT2; hsa:8801; O95195; Q6NUH7; Q86VX8; Q8WUQ1; Q96I99	ENSG00000172340	TCA cycle and deficiency of pyruvate dehydrogenase complex (PDHc); Metabolic reprogramming in colon cancer; TCA cycle (aka Krebs or citric acid cycle)	4	0	6311217182	4330971635	6574221883	11270941279	7128202946	5295777669	11198298758	7753321494	6555000755	7571124496	8081819625	8210459625	6271409030	4478235306	7611751683	3677084229	4611481317	8947070029
High	Master Protein	P28331	NADH-ubiquinone oxidoreductase 75 kDa subunit, mitochondrial OS=Homo sapiens OX=9606 GN=NDUFS1 PE=1 SV=3	0	463.598	53	41	5147	41	727	79.4	6.23	1235.23	1708	475.94	2059.88	1827.15	2921.89	34	32	26	35	36	37	4719	NDUFS1	B4DIN9; B4DJA0; B4DPG1; B4DUC1; E7ENF3; hsa:4719; P28331; Q53TR8; Q8N1C4; Q8TCC9	ENSG00000023228; ENSG00000283447	Electron transport chain: OXPHOS system in mitochondria; Nonalcoholic fatty liver disease; Oxidative phosphorylation	5	0	2076568871	1531227026	3471185076	3488864669	2836533919	2426606011	2617983308	2014001809	3017824255	2250201993	2465941516	3385277746	2383473087	1464122744	2181879666	1292150291	1587776335	1804945316
High	Master Protein	P30038	Delta-1-pyrroline-5-carboxylate dehydrogenase, mitochondrial OS=Homo sapiens OX=9606 GN=ALDH4A1 PE=1 SV=3	0	461.293	55	40	13423	40	563	61.7	8.07	3357.31	4048.68	1012.19	5239.49	5033.9	6197.95	35	37	28	37	37	39	8659	ALDH4A1	A8K1Q7; B4DGE4; D2D4A3; hsa:8659; P30038; Q16882; Q53HU4; Q5JNV6; Q8IZ38; Q96IF0; Q9UDI6	ENSG00000159423	22q11.2 copy number variation syndrome; p53 transcriptional gene network	4	0	16145001803	13275508176	23469976018	18009806091	26697410110	18113982944	26436077384	17328003300	15217863481	13670120024	24438959448	34291771108	19811301525	11581136232	17078206558	9244641978	15520709078	6880904755
High	Master Protein	O43451	Maltase-glucoamylase OS=Homo sapiens OX=9606 GN=MGAM PE=1 SV=6	0	456.88	25	45	2666	44	2753	311.8	5.41	572.48	884.22	170.04	773.97	1291.23	866.97	33	33	24	31	41	33	8972	MGAM	E7ER45; hsa:8972; O43451; Q0VAX6; Q75ME7; Q86UM5	ENSG00000257335	Glucocorticoid receptor pathway	3	1	656959985	4.60696e+08	4.79925e+08	9.36721e+08	6.10966e+08	8.55278e+08	1425842456	6.74035e+08	385527332	3.37196e+08	8.23995e+08	489369089	6.67637e+08	2.93639e+08	8.52807e+08	2.46863e+08	5.46365e+08	6.46583e+08
High	Master Protein	Q8WUM4	Programmed cell death 6-interacting protein OS=Homo sapiens OX=9606 GN=PDCD6IP PE=1 SV=1	0	452.852	60	53	4049	53	868	96	6.52	769.33	993.28	278.12	1516.59	1442.4	1544.76	44	41	35	49	50	49	10015	PDCD6IP	C5MQH7; E9PFU1; hsa:10015; Q6NUS1; Q8WUM4; Q9BX86; Q9NUN0; Q9P2H2; Q9UKL5	ENSG00000170248	Inhibition of exosome biogenesis and secretion by Manumycin A in CRPC cells	5	0	1588026732	2196180662	1792829026	2166817761	2386623697	2230792801	2492551583	2137102195	2188682741	3078114953	2268372521	2593688162	2504869140	2474449480	2466500098	2080861441	2314606251	2597840465
High	Master Protein	P06753-2	Isoform 2 of Tropomyosin alpha-3 chain OS=Homo sapiens OX=9606 GN=TPM3	0	452.154	81	43	5447	3	248	29	4.78	1360.32	1431.79	614.34	2438.88	2184.38	2052.05	41	37	37	40	41	40		TPM3	P06753-2			0	0	2.33051e+08	1.56315e+08	441175918	1.03397e+08	3.82843e+08	2.1949e+08	4.68028e+08	2.97611e+08	3.32828e+08	2.90735e+08	341840032	4.51463e+08	462217085	2.07167e+08	1.2175e+08	5.08041e+07	195926066	1.40596e+08
High	Master Protein	P05091	Aldehyde dehydrogenase, mitochondrial OS=Homo sapiens OX=9606 GN=ALDH2 PE=1 SV=2	0	451.631	62	40	11192	36	517	56.3	7.05	2797.4	3125.57	1365.19	4654.56	4253.08	5605.49	35	38	36	40	38	39	217	ALDH2	B4DW54; E7EUE5; hsa:217; P05091; Q03639; Q6IB13; Q6IV71	ENSG00000111275	Fatty acid omega-oxidation; Ethanol effects on histone modifications; Tryptophan metabolism; Fluoroacetic acid toxicity	7	4	6728797202	11358453848	9346121396	11311297737	17990706202	6722339443	17273361754	8879121692	6102015991	7194602372	9780173572	21306864807	7475778701	4724412460	7932891513	8022647285	4527036198	8134491654
High	Master Protein	Q14697-2	Isoform 2 of Neutral alpha-glucosidase AB OS=Homo sapiens OX=9606 GN=GANAB	0	451.113	50	44	3274	2	966	109.4	6.24	673.32	755.93	181.76	1167.73	1071.31	1396.41	36	34	29	41	40	43		GANAB	Q14697-2			0	45	1147102390	1189698719	8.1536e+08	1246215053	4.41681e+08	1206010902	1087078598	1043777875	1591857760	1221996887	1030675279	9.7206e+08	9.26437e+08	1485186749	1578850395	1215308619	1162712207	1001461376
High	Master Protein	Q9Y2J2-4	Isoform 4 of Band 4.1-like protein 3 OS=Homo sapiens OX=9606 GN=EPB41L3	0	448.124	48	49	3497	2	883	98.4	5.34	906.62	1211.28	259.21	1547.29	1311.65	2040.44	36	37	31	39	39	48		EPB41L3	Q9Y2J2-4			0	0	4.9506e+07	6.80126e+07	4.94268e+07	2.5439e+07	2.14256e+08	1.01201e+08	1.06596e+08	5.12725e+07	3.44756e+07	1.24751e+08	1.00197e+08	6.06911e+07	2.70287e+07	2.67735e+07	2.49042e+07	3.09915e+07	2.43174e+07	3.83772e+07
High	Master Protein	P07951	Tropomyosin beta chain OS=Homo sapiens OX=9606 GN=TPM2 PE=1 SV=1	0	446.757	77	46	4222	13	284	32.8	4.7	1168.22	1320.25	525.45	1731.31	1533.8	1322.41	44	39	31	32	35	30	7169	TPM2	A6NM85; hsa:7169; P06468; P07951; Q13894; Q53FM4; Q5TCU4; Q5TCU7; Q9UH67	ENSG00000198467	Striated muscle contraction pathway	3	20	3097215378	2257067615	1387883857	1133068530	810044038	9.71959e+08	1112682970	2035919805	1742528641	2071489068	9.05534e+08	9.9916e+08	8.76132e+08	1138967536	1230082255	2996763709	1366175426	5.64207e+08
High	Master Protein	P14543	Nidogen-1 OS=Homo sapiens OX=9606 GN=NID1 PE=1 SV=3	0	442.897	33	42	5859	41	1247	136.3	5.29	1482.87	1712.1	652.58	2402.32	2234.08	2527.78	38	37	36	39	40	39	4811	NID1	hsa:4811; P14543; Q14942; Q59FL2; Q5TAF2; Q5TAF3; Q86XD7	ENSG00000116962		2	1	4035828929	3533887004	3192311451	3990583761	2034202470	3409300554	3308419938	2931413742	3520836883	3203885515	3422659565	3787960300	3632391990	3211043737	3708440803	4117903793	4020962392	3584196322
High	Master Protein	P13647	Keratin, type II cytoskeletal 5 OS=Homo sapiens OX=9606 GN=KRT5 PE=1 SV=3	0	442.489	52	51	5170	28	590	62.3	7.74	873.79	1354.61	199.01	1696.08	1710.61	1557.64	43	46	27	46	49	47	3852	KRT5	hsa:3852; P13647; Q6PI71; Q6UBJ0; Q8TA91	ENSG00000186081		3	1	1028938675	1462656886	8.69764e+08	1157076853	1156627981	1366774780	881800034	5.42258e+08	9.03549e+08	8.85446e+08	2210126974	2415352862	3901189259	1430871624	9.75767e+08	9.08411e+08	2028091626	1093580718
High	Master Protein	P27797	Calreticulin OS=Homo sapiens OX=9606 GN=CALR PE=1 SV=1	0	440.83	73	40	7800	40	417	48.1	4.44	1295.91	1573.62	607.95	2339.96	2774.08	2701.8	27	27	29	33	38	36	811	CALR	hsa:811; P27797; Q6IAT4; Q9UDG2	ENSG00000179218	Androgen receptor signaling pathway; Complement system; Photodynamic therapy-induced unfolded protein response; VEGFA-VEGFR2 signaling; GDNF signaling; Calcium regulation in cardiac cells	13	0	4651223335	4472980089	8394502098	5231202174	1573187079	4767188141	6420814653	5549554974	9351923751	3708022950	4172998239	3824452833	4079862512	4597960023	5271455272	4197505947	4088132372	5310080651
High	Master Protein	P02538	Keratin, type II cytoskeletal 6A OS=Homo sapiens OX=9606 GN=KRT6A PE=1 SV=3	0	437.841	60	53	5849	5	564	60	8	1074.39	1421.99	271.7	1870.64	2024.74	1833.55	38	42	22	43	48	49	3853	KRT6A	A4QPC1; hsa:3853; P02538; P48667; Q08AR4; Q6NT67; Q96CL4	ENSG00000205420	Ectoderm differentiation; Ectoderm differentiation	4	40	2838247507	2501122969	1306401172	1184181026	2244751448	3309340300	1931224422	1242903958	2043538156	7.68961e+08	4040496044	2016441792	4026377401	2880337440	1690527632	2302702994	2935145812	2676585248
High	Master Protein	P09493-7	Isoform 7 of Tropomyosin alpha-1 chain OS=Homo sapiens OX=9606 GN=TPM1	0	433.478	83	47	4139	9	284	32.7	4.74	1113.35	1242.6	494.84	1641.13	1448.97	1247.18	44	36	34	37	41	36		TPM1	P09493-7			0	42	6333980928	6636917631	3227431610	3116739031	3583188880	3324035891	4124149594	4827736868	3044048969	3378407249	4088709986	3260010350	3492685694	4488691279	3876118284	6787602776	5052149385	2934137507
High	Master Protein	O15020	Spectrin beta chain, non-erythrocytic 2 OS=Homo sapiens OX=9606 GN=SPTBN2 PE=1 SV=3	0	433.212	32	65	1339	52	2390	271.2	6.11	329.09	229.49	29.12	402.54	362.78	637.17	41	33	13	47	40	56	6712	SPTBN2	hsa:6712; O14872; O14873; O15020	ENSG00000173898		5	0	2.49599e+08	4.98481e+08	6.31889e+08	5.48853e+08	7.43205e+08	6.12686e+08	5.42858e+08	7.04415e+08	7.14499e+08	5.34449e+08	2.57574e+08	4.94692e+08	5.82374e+08	5.00964e+08	4.98109e+08	261001818	5.04277e+08	3.9536e+08
High	Master Protein	P27824	Calnexin OS=Homo sapiens OX=9606 GN=CANX PE=1 SV=2	0	432.436	48	43	3624	43	592	67.5	4.6	677.02	821.15	253.39	1265.43	1343.11	1755.49	32	34	27	39	39	38	821	CANX	B2R5V8; B4DGP8; B4E2T8; D3DWQ3; D6R9K3; hsa:821; P27824	ENSG00000127022; ENSG00000283777		8	0	1735627945	1260167998	1567367481	1814593020	1175222904	7.8543e+08	2152473576	1639043690	2378057996	2055066965	9.88108e+08	7.71872e+08	1247447846	1861283422	1736374562	2186721552	7.92942e+08	1603191023
High	Master Protein	P12110	Collagen alpha-2(VI) chain OS=Homo sapiens OX=9606 GN=COL6A2 PE=1 SV=4	0	431.789	26	39	5699	10	1019	108.5	6.21	1578.91	1866.96	790.9	2721.61	2138.07	2063.41	36	33	24	36	34	32	1292	COL6A2	hsa:1292; P12110; Q13909; Q13910; Q13911; Q14048; Q14049; Q16259; Q16597; Q6P0Q1; Q9UML3; Q9Y4S8	ENSG00000142173	miRNA targets in ECM and membrane receptors; Focal adhesion; Focal adhesion: PI3K-Akt-mTOR-signaling pathway; PI3K-Akt signaling pathway	12	31	5780701774	6835355264	3778086630	3220194667	2061396537	5168528951	6278728399	5604920683	7934246732	3693155348	4690455228	3220830140	3384564364	5146022999	5854786878	7848045109	4342319998	4117148473
High	Master Protein	P11310	Medium-chain specific acyl-CoA dehydrogenase, mitochondrial OS=Homo sapiens OX=9606 GN=ACADM PE=1 SV=1	0	429.129	59	36	6620	36	421	46.6	8.37	1667.54	2117.2	703.88	2888.81	2620.41	3151.58	32	33	26	33	34	35	34	ACADM	hsa:34; P11310; Q5T4U4; Q9NYF1	ENSG00000117054	Fatty acid beta-oxidation; PPAR-alpha pathway; Nuclear receptors meta-pathway; Mitochondrial long chain fatty acid beta-oxidation; Amino acid metabolism; PPAR signaling pathway; Mitochondrial fatty acid oxidation disorders; Female steroid hormones in cardiomyocyte energy metabolism; Sudden infant death syndrome (SIDS) susceptibility pathways	13	0	4952617491	4102887335	6129511210	7008460724	9566532995	4814844592	7998753808	6432713228	5314049019	3132492738	6723059068	8322512389	7192613021	2819759151	6473803858	2031230710	3864904215	3104817591
High	Master Protein	P17661	Desmin OS=Homo sapiens OX=9606 GN=DES PE=1 SV=3	0	428.748	83	51	4233	44	470	53.5	5.27	1114.63	1691.37	422.66	1378.55	1621.19	969.2	36	49	27	24	42	16	1674	DES	hsa:1674; P17661; Q15787; Q549R7; Q549R8; Q549R9; Q8IZR1; Q8IZR6; Q8NES2; Q8NEU6; Q8TAC4; Q8TCX2; Q8TD99; Q9UHN5; Q9UJ80	ENSG00000175084	Arrhythmogenic right ventricular cardiomyopathy; Striated muscle contraction pathway; IL-18 signaling pathway; Synthesis of ceramides and 1-deoxyceramides; Markers of kidney cell lineage	6	0	1501667583	1449413489	4.29628e+08	1081856747	7.46502e+08	570660334	3.21185e+08	9.69423e+08	9.16832e+08	6.47235e+08	5.51369e+08	7.02692e+08	557502887	1346676353	849690362	1420539568	8.30575e+08	1086071926
High	Master Protein	Q07157	Tight junction protein ZO-1 OS=Homo sapiens OX=9606 GN=TJP1 PE=1 SV=3	0	427.052	38	56	2068	3	1748	195.3	6.7	457.29	365.95	63.64	708.81	714.35	1170.78	42	35	23	46	43	53	7082	TJP1	B4E3K1; hsa:7082; Q07157; Q2NKP3; Q4ZGJ6	ENSG00000104067; ENSG00000277401	Epithelial to mesenchymal transition in colorectal cancer; MFAP5 effect on permeability and motility of endothelial cells via cytoskeleton rearrangement; Gastrin signaling pathway; Disruption of postsynaptic signaling by CNV; 1q21.1 copy number variation syndrome; CKAP4 signaling pathway map	11	54	8.4263e+08	1088171233	1279119122	1074631872	1431245908	1502339795	1258321360	1429996175	1082419682	8.02616e+08	1218777851	1052079245	1329087858	1252781157	1079107108	9.448e+08	1059076995	6.93011e+08
High	Master Protein	P67936	Tropomyosin alpha-4 chain OS=Homo sapiens OX=9606 GN=TPM4 PE=1 SV=3	0	426.838	77	45	4493	10	248	28.5	4.69	1127.19	1146.09	543.17	1991.13	1628.13	1447.9	40	36	37	41	42	35	7171	TPM4	hsa:7171; P07226; P67936; Q15659; Q5U0D9; Q9BU85; Q9H8Q3; Q9UCS1; Q9UCS2; Q9UCS3; Q9UCS4	ENSG00000167460	Striated muscle contraction pathway	5	14	1217416871	1401333164	1234421282	8.40066e+08	7.67474e+08	7.77416e+08	1423046057	1873478768	1418829010	1127237240	9.86397e+08	7.54211e+08	1108177024	1368614962	1335079668	2441227385	1838884259	6.62982e+08
High	Master Protein	P78371	T-complex protein 1 subunit beta OS=Homo sapiens OX=9606 GN=CCT2 PE=1 SV=4	0	424.904	73	40	2722	40	535	57.5	6.46	521.87	640.57	175.93	1029.81	1047.34	1151.47	32	34	24	35	36	39	10576	CCT2	A8K402; B5BTY7; B7Z243; B7Z7K4; B7ZAT2; hsa:10576; P78371; Q14D36; Q6IAT3	ENSG00000166226	16p11.2 proximal deletion syndrome	10	0	1409721971	1634562540	1692231975	1612803470	1828011953	1816754451	1444639368	1726484565	2271892609	1391610509	1612412136	1742639660	1942698521	2157766672	1726161185	1651334450	1516225594	1239911132
High	Master Protein	P34896	Serine hydroxymethyltransferase, cytosolic OS=Homo sapiens OX=9606 GN=SHMT1 PE=1 SV=1	0	421.961	60	33	3229	32	483	53	7.71	654.13	923.24	194.39	1020.83	1132.9	1769.4	26	26	19	28	29	32	6470	SHMT1	B4DPM9; D3DXD0; hsa:6470; P34896; Q96HY0; Q9UMD1; Q9UMD2	ENSG00000176974; ENSG00000284320	Glycine metabolism; Folate metabolism; One-carbon metabolism; Trans-sulfuration, one-carbon metabolism and related pathways; Clear cell renal cell carcinoma pathways; Male infertility; Neuroinflammation and glutamatergic signaling	9	2	1841150806	1785714136	2293747212	3565759356	1714910937	1476058124	1982274274	2019770576	1935796229	1692321780	2629334613	3593726830	2254209596	1795544870	2042028522	1244664380	2242598826	1903689003
High	Master Protein	Q14315	Filamin-C OS=Homo sapiens OX=9606 GN=FLNC PE=1 SV=3	0	421.676	32	71	2505	53	2725	290.8	5.97	620.9	767.28	188.97	805.2	672.18	558.05	57	58	21	37	47	29	2318	FLNC	B2ZZ88; hsa:2318; O95303; Q07985; Q14315; Q9NS12; Q9NYE5; Q9UMR8; Q9Y503	ENSG00000128591	Focal adhesion; MAPK signaling pathway; Ebola virus infection in host	4	0	5.89448e+08	5.45884e+08	2.70033e+08	2.56382e+08	3.54785e+08	2.85096e+08	3.08072e+08	2.21522e+08	1.4127e+08	2.49025e+08	2.94153e+08	3.74307e+08	3.72777e+08	3.7092e+08	5.10181e+08	3.28505e+08	407760770	4.88919e+08
High	Master Protein	P11277	Spectrin beta chain, erythrocytic OS=Homo sapiens OX=9606 GN=SPTB PE=1 SV=5	0	420.895	35	71	921	61	2137	246.3	5.27	213.75	257.06	16.75	187.68	161.3	416.56	37	51	6	18	18	55	6710	SPTB	hsa:6710; P11277; Q15510; Q15519	ENSG00000070182		4	1	1733166670	9.22183e+08	6.0343e+08	883566166	7.90622e+08	7.71272e+08	2.40743e+08	9.68864e+08	3.25674e+08	2105694415	1067066942	6.73929e+08	646145649	1091599834	6.56211e+08	263051037	1576074580	3190422549
High	Master Protein	Q13423	NAD(P) transhydrogenase, mitochondrial OS=Homo sapiens OX=9606 GN=NNT PE=1 SV=3	0	419.88	35	41	4102	41	1086	113.8	8.09	1027.41	1207.91	318.53	1652	1352.07	1804.18	38	35	26	39	37	38	23530	NNT	hsa:23530; Q13423; Q16796; Q2TB60; Q8N3V4	ENSG00000112992		1	0	1800144206	2726991999	2225432574	2614321252	6767204204	4102578235	3313516141	3744761073	1802456402	2949062369	2315982667	2652306134	2282074438	3019004039	3482584619	2271768613	2109576888	3201987338
High	Master Protein	P00352	Aldehyde dehydrogenase 1A1 OS=Homo sapiens OX=9606 GN=ALDH1A1 PE=1 SV=2	0	418.783	61	35	6501	32	501	54.8	6.73	1540.37	1893.53	602.17	2544.85	2724.16	2923.97	32	32	27	33	32	34	216	ALDH1A1	hsa:216; O00768; P00352; Q5SYR1	ENSG00000165092	Folate-alcohol and cancer pathway hypotheses; Fatty acid omega-oxidation; Dopaminergic neurogenesis; Amino acid metabolism; Ethanol effects on histone modifications; Disorders of fructose metabolism; Vitamin A and carotenoid metabolism	10	0	3697650972	4262716794	2333345437	5212300684	2106362322	1899217865	2675169704	3331991492	2214528652	1744383287	3071539036	2431000093	2446023556	3933684587	4109802507	4311396380	3051054415	7696552752
High	Master Protein	P19338	Nucleolin OS=Homo sapiens OX=9606 GN=NCL PE=1 SV=3	0	418.365	42	45	4999	45	710	76.6	4.7	767.65	934.39	385.01	1772.34	1689.31	1690.84	38	36	36	41	44	41	4691	NCL	hsa:4691; P19338; Q53SK1; Q8NB06; Q9UCF0; Q9UDG1	ENSG00000115053	Pathogenic Escherichia coli infection; VEGFA-VEGFR2 signaling	3	0	3191667589	4235756213	3625225967	3527127645	3946755575	3463099742	5352489187	5080821221	4661506459	3452411830	3451359763	2811406057	3152685741	4662347343	4278639441	4321377206	4337764587	3932821532
High	Master Protein	Q9UM54-6	Isoform 6 of Unconventional myosin-VI OS=Homo sapiens OX=9606 GN=MYO6	0	417.921	39	49	2453	49	1285	148.6	8.56	598.53	599.7	109.12	991.15	806.83	1147.22	37	41	22	44	44	45		MYO6	Q9UM54-6			0	0	7.05838e+08	1117991716	8.45819e+08	1297392993	1786690225	1280933597	1850678007	1073852414	7.96819e+08	1060601354	1113196701	1148571489	1116411992	1493185222	1422685722	7.47361e+08	9.74981e+08	1152946094
High	Master Protein	P31930	Cytochrome b-c1 complex subunit 1, mitochondrial OS=Homo sapiens OX=9606 GN=UQCRC1 PE=1 SV=3	0	415.769	59	31	4381	30	480	52.6	6.37	1021.62	1213.1	377.73	1532.13	1571.41	2219.74	27	25	23	31	26	28	7384	UQCRC1	B2R7R8; hsa:7384; P31930; Q96DD2	ENSG00000010256	Electron transport chain: OXPHOS system in mitochondria; Nonalcoholic fatty liver disease; Mitochondrial complex III assembly	4	1	1865010672	1566392757	3359884977	2809619130	4133486382	3227403435	2613119768	2724946731	3236602361	2146967905	2542026229	2753130629	2268974884	1585242226	2347040345	1750228650	1821954297	1190945191
High	Master Protein	P11586	C-1-tetrahydrofolate synthase, cytoplasmic OS=Homo sapiens OX=9606 GN=MTHFD1 PE=1 SV=4	0	415.376	54	52	4445	50	935	101.5	7.3	897.05	1185.04	332.61	1601.92	1568.74	2146.59	39	39	28	45	44	47	4522	MTHFD1	A0A024R652; A0A384N5Y3; B2R5Y2; G3V2B8; hsa:4522; P11586; Q86VC9; Q9BVP5	ENSG00000100714	Folate metabolism; One-carbon metabolism; Trans-sulfuration, one-carbon metabolism and related pathways; Male infertility	5	2	2283851047	2580638738	2113269530	3282830218	2544882264	2214971972	2584671889	2302635570	2696167992	2232527680	3090883809	3784149409	3231919600	2093828860	2438160788	1563127978	2267386988	2554037641
High	Master Protein	P09327	Villin-1 OS=Homo sapiens OX=9606 GN=VIL1 PE=1 SV=4	0	413.863	49	38	4601	38	827	92.6	6.39	1060.72	1520.2	424.42	1628.28	1750.32	1978.12	36	37	29	35	36	38	7429	VIL1	B2R9A7; hsa:7429; P09327; Q53S11; Q96AC8	ENSG00000127831	Regulation of actin cytoskeleton	1	0	2386175233	2185124107	3024477417	3994307474	3878334417	2398799257	3318604223	3165161975	1790580441	1094301516	3670828158	1872169887	2982660559	1695053268	2756994679	8.46367e+08	2013710257	1533168159
High	Master Protein	P08758	Annexin A5 OS=Homo sapiens OX=9606 GN=ANXA5 PE=1 SV=2	0	413.08	82	38	6463	36	320	35.9	5.05	1174.58	1336.77	511.09	2245.7	2414.8	2307.38	31	30	25	35	35	36	308	ANXA5	D3DNW7; hsa:308; P08758; Q6FHB3; Q6FI16; Q8WV69; Q9UDH9	ENSG00000164111	Apoptosis-related network due to altered Notch3 in ovarian cancer; Interactions between LOXL4 and oxidative stress pathway; Prostaglandin synthesis and regulation	4	0	2175701087	3706340186	2038421239	4008410474	2672145747	2965163174	3276186836	2667239433	1636479284	2881368353	2139529550	3153485920	3039998039	4531771330	3204208069	7928180164	3215168211	4183007500
High	Master Protein	P60174	Triosephosphate isomerase OS=Homo sapiens OX=9606 GN=TPI1 PE=1 SV=4	0	412.845	94	30	11371	30	249	26.7	6.9	3388.35	3670.6	1212.56	5611.99	5383.68	5998.14	25	22	23	28	26	29	7167	TPI1	B7Z5D8; D3DUS9; hsa:7167; P00938; P60174; Q6FHP9; Q6IS07; Q8WWD0; Q96AG5	ENSG00000111669	Fatty acid beta-oxidation; Cori cycle; HIF1A and PPARG regulation of glycolysis; Clear cell renal cell carcinoma pathways; Aerobic glycolysis; Disorders of fructose metabolism; Glycolysis and gluconeogenesis	9	0	12509534642	12052677441	21981783281	21344352047	13595846538	11544495655	18071785649	16292466401	16701001317	6309432449	11743873245	19414866451	19725939353	9074384305	11791684744	7406530152	12792926310	19199703894
High	Master Protein	P31948	Stress-induced-phosphoprotein 1 OS=Homo sapiens OX=9606 GN=STIP1 PE=1 SV=1	0	412.755	61	44	3268	44	543	62.6	6.8	622.36	605.44	243.3	995.72	1093.82	1321.7	33	33	25	38	41	42	10963	STIP1	B4DM70; F5H0T1; G3XAD8; hsa:10963; P31948; Q3ZCU9; Q5TZU9	ENSG00000168439	VEGFA-VEGFR2 signaling	3	0	2027947609	2271881218	2544756817	2115873148	1507743027	2039455355	1715235822	2139147391	3225569803	1718417475	2136346050	1620433557	1610201085	2380378339	2297402951	2497432663	2160629485	1346238661
High	Master Protein	P50395	Rab GDP dissociation inhibitor beta OS=Homo sapiens OX=9606 GN=GDI2 PE=1 SV=2	0	412.217	67	39	3631	29	445	50.6	6.47	607.97	800.64	168.08	1128.14	1104.7	1188.74	31	29	22	32	35	35	2665	GDI2	hsa:2665; O43928; P50395; Q5SX88; Q9UQM6	ENSG00000057608		2	12	1649547653	2008750966	1530603694	2387410689	1617079883	2145431078	1651675432	1866453601	1406529826	1931515462	1844108111	2476204933	2171685434	2551770783	2393684673	2851023689	2365601426	2074943239
High	Master Protein	P30086	Phosphatidylethanolamine-binding protein 1 OS=Homo sapiens OX=9606 GN=PEBP1 PE=1 SV=3	0	411.108	95	24	10967	24	187	21	7.53	3571.11	4147.78	1485.47	4372.9	5658.83	6710.24	20	17	16	20	22	22	5037	PEBP1	B2R4S1; hsa:5037; P30086	ENSG00000089220	Pancreatic adenocarcinoma pathway; EGF/EGFR signaling pathway	9	0	15178268897	12308521576	17554941011	18539787722	19018071714	15658366376	12725838885	11274734695	4678314794	8002542386	14301245661	16218595492	11555664530	9806850769	13872354013	6263181774	11655384740	4541065427
High	Master Protein	P09525-3	Isoform 3 of Annexin A4 OS=Homo sapiens OX=9606 GN=ANXA4	0	409.67	84	39	6030	37	321	36.1	6.13	1164.07	1209.33	473.6	2296.43	2499.6	2510.47	33	31	28	37	35	36		ANXA4	P09525-3			0	2	3118142208	4476118603	4276067565	4826972558	5236370905	5201946018	5764631190	4533694083	6677514850	4618797685	2907565811	2987737651	6736423386	5961983806	5803764484	4007541344	3815854448	4809932460
High	Master Protein	Q00839	Heterogeneous nuclear ribonucleoprotein U OS=Homo sapiens OX=9606 GN=HNRNPU PE=1 SV=6	0	407.761	36	39	4687	39	825	90.5	6	1009.83	1091.43	281.53	1744.54	1858.08	1946.5	35	34	29	38	38	36	3192	HNRNPU	hsa:3192; O75507; Q00839; Q8N174; Q96HY9; Q9BQ09	ENSG00000153187	mRNA processing; lncRNA in canonical Wnt signaling and colorectal cancer	4	0	2006846931	2656849006	2522980384	3498397815	6639727407	2882794227	2663291732	3098967078	4194969011	2171113209	2006964852	3068656030	3572072543	2765957721	3342490296	2587151454	2955756387	1797101223
High	Master Protein	P54652	Heat shock-related 70 kDa protein 2 OS=Homo sapiens OX=9606 GN=HSPA2 PE=1 SV=1	0	407.636	54	43	7840	21	639	70	5.74	2244.14	2267.68	829.02	3752.03	3808.27	3520.42	39	32	34	35	42	36	3306	HSPA2	hsa:3306; P54652; Q15508; Q53XM3; Q9UE78	ENSG00000126803	Parkin-ubiquitin proteasomal system pathway; MAPK signaling pathway; Measles virus infection; 7q11.23 copy number variation syndrome; Urotensin-II-mediated signaling pathway	9	1	5.14633e+08	6.62593e+08	4.04142e+08	5.357e+08	7.92014e+08	4.50489e+08	4.29468e+08	6.59199e+08	2.02278e+08	2.64493e+08	7.4976e+08	5.30595e+08	6.36714e+08	629180069	5.14103e+08	4.50878e+08	8.05045e+08	9.40498e+08
High	Master Protein	P01011	Alpha-1-antichymotrypsin OS=Homo sapiens OX=9606 GN=SERPINA3 PE=1 SV=2	0	406.836	47	24	5477	24	423	47.6	5.52	1996.42	947.34	455.76	1482.25	5032.22	928.34	22	18	19	22	24	19	12	SERPINA3	B3KVQ7; hsa:12; P01011; Q13703; Q2TU87; Q2TU88; Q59GP9; Q6LBY8; Q6LDT7; Q6NSC9; Q8N177; Q96DW8; Q9UC47; Q9UNU9	ENSG00000196136	Selenium micronutrient network; Vitamin B12 metabolism; Folate metabolism	5	0	1751967764	6031393370	2042033926	1190226278	7.06531e+08	1722919788	5134544635	9.13154e+08	2654403410	1700939784	1664177293	964080493	1260563361	5897049445	2454526784	3327909686	2665243640	1695503891
High	Master Protein	P04259	Keratin, type II cytoskeletal 6B OS=Homo sapiens OX=9606 GN=KRT6B PE=1 SV=5	0	405.182	58	51	6100	6	564	60	8	1203.06	1510.26	325.04	2016.21	2070.77	1912.33	35	40	22	40	48	47	3854	KRT6B	hsa:3854; P04259; P48669	ENSG00000185479		2	0	3.63561e+08	4.33111e+08	1.81263e+08	1.1246e+08	4.08542e+08	3.38329e+08	7.67014e+07	1.16141e+08	2.35211e+08	1.18873e+08	5.99739e+08	3.94078e+08	5.82898e+08	3.13328e+08	232841143	3.02413e+07	1.3635e+08	7.60756e+07
High	Master Protein	P12956	X-ray repair cross-complementing protein 6 OS=Homo sapiens OX=9606 GN=XRCC6 PE=1 SV=2	0	402.139	58	46	2864	46	609	69.8	6.64	608.28	637.36	151.07	1091.98	1070.21	1194.06	32	36	24	42	42	45	2547	XRCC6	B1AHC8; hsa:2547; P12956; Q6FG89; Q9UCQ2; Q9UCQ3	ENSG00000196419	Non-homologous end joining; DNA repair pathways, full network; Primary ovarian insufficiency; 10q11.21q11.23 copy number variation syndrome	9	0	7.69527e+08	1030567324	674591727	1421893222	6.62006e+08	8.88162e+08	1037327707	9.86993e+08	1160680480	6.67547e+08	7.31806e+08	1101356816	1327196674	1381622924	1342139678	1404185375	1378898865	1508152433
High	Master Protein	P06748	Nucleophosmin OS=Homo sapiens OX=9606 GN=NPM1 PE=1 SV=2	0	402.061	62	26	4487	26	294	32.6	4.78	807.06	915.65	398.98	1794.32	1968.42	1909.57	20	20	18	23	26	24	4869	NPM1	A8K3N7; B5BU00; D3DQL6; hsa:4869; P06748; P08693; Q12826; Q13440; Q13441; Q14115; Q5EU94; Q5EU95; Q5EU96; Q5EU97; Q5EU98; Q5EU99; Q6V962; Q8WTW5; Q96AT6; Q96DC4; Q96EA5; Q9BYG9; Q9UDJ7	ENSG00000181163		9	0	1958817370	3089297184	3601614076	2686805059	2552927143	3823100049	3841619475	3928364893	6314459336	3649959996	2578379650	2490882327	2699149292	2695639349	3190393745	3106519916	2737104580	2944869572
High	Master Protein	P02679	Fibrinogen gamma chain OS=Homo sapiens OX=9606 GN=FGG PE=1 SV=3	0	401.346	51	29	5234	29	453	51.5	5.62	1963.64	1717.39	421.84	1855.17	2740.57	2023.85	22	22	16	20	29	24	2266	FGG	A8K057; hsa:2266; P02679; P04469; P04470; Q53Y18; Q96A14; Q96KJ3; Q9UC62; Q9UC63; Q9UCF3	ENSG00000171557	Selenium micronutrient network; Folate metabolism; Blood clotting cascade; Complement system; VEGFA-VEGFR2 signaling; Fibrin complement receptor 3 signaling pathway; COVID-19, thrombosis and anticoagulation; Network map of SARS-CoV-2 signaling pathway	28	0	26246807712	4823058846	12708119497	2254231563	1958262859	9123391913	1889431287	2876910362	3837548317	1921593763	3490282839	2110369348	2886721639	7521267087	3414379387	5962868861	6790058445	6370941602
High	Master Protein	Q9BX66-9	Isoform 9 of Sorbin and SH3 domain-containing protein 1 OS=Homo sapiens OX=9606 GN=SORBS1	0	396.334	55	48	2254	3	781	87.1	8.07	546.86	804.87	244.87	831.04	911.06	706.84	35	44	32	36	41	34		SORBS1	Q9BX66-9			0	0	2.27811e+07	2.15388e+07	5.4012e+07	4.00597e+07	2.43285e+07	4.20362e+07	5.00381e+07	9.40306e+07	2.39272e+07	1.5685e+06	2.20929e+07	1.47608e+07	2.27441e+07	1.6828e+07	1.86866e+07	3.9702e+07	1.59988e+07	1.8454e+07
High	Master Protein	Q15063-5	Isoform 5 of Periostin OS=Homo sapiens OX=9606 GN=POSTN	0	395.938	53	40	2082	7	809	90.4	7.39	376.78	638.64	63.28	1491.16	562.8	385.3	28	30	17	40	33	25		POSTN	Q15063-5			0	38	2284028391	4727453432	2158881531	2176429179	1583447297	5616241281	2233277085	2886896018	2690219333	2418579642	2641778448	1541364538	3700097274	3645979233	4995336925	2969236691	1125268049	5512648496
High	Master Protein	P61978-3	Isoform 3 of Heterogeneous nuclear ribonucleoprotein K OS=Homo sapiens OX=9606 GN=HNRNPK	0	394.499	65	38	6862	38	440	48.5	5.54	1334.98	1697.03	577.23	2522.9	2539.91	2617.85	28	32	26	34	33	35		HNRNPK	P61978-3			0	0	3256477942	4061965438	4301358258	3358061678	3647909816	3377685317	4469624778	4079522054	4032968003	2630109796	3588594130	2536542894	3499410374	4279983931	4428842581	3895432742	4120216227	4130144942
High	Master Protein	Q15233	Non-POU domain-containing octamer-binding protein OS=Homo sapiens OX=9606 GN=NONO PE=1 SV=4	0	393.896	57	36	3630	35	471	54.2	8.95	648.53	646.9	256.11	1207.34	1475.53	1208.77	31	25	23	34	30	33	4841	NONO	B7Z4C2; D3DVV4; F5GYZ3; hsa:4841; O00201; P30807; Q12786; Q15233; Q9BQC5	ENSG00000147140	mRNA processing	1	0	1565202615	1830831477	2125727068	2241877035	1034296723	1470992804	2242486635	2359763647	2200340574	1242601905	1421992594	1665451478	1968712143	1652911320	2088475046	1874185419	2127783504	1693508639
High	Master Protein	P22695	Cytochrome b-c1 complex subunit 2, mitochondrial OS=Homo sapiens OX=9606 GN=UQCRC2 PE=1 SV=3	0	393.322	64	27	4582	27	453	48.4	8.63	1344.5	1599.12	434.2	1969.93	1844.61	2798.61	24	23	20	24	24	25	7385	UQCRC2	B3KSN4; hsa:7385; P22695; Q9BQ05	ENSG00000140740	Electron transport chain: OXPHOS system in mitochondria; Nonalcoholic fatty liver disease; Mitochondrial complex III assembly	4	0	2508808603	2212629704	3800594716	5227217844	5049352801	3360006539	4239266946	2950163387	2370117542	2089776848	4196283595	5639667360	4505102825	2450031003	3465901688	1535278366	2885377843	2805829310
High	Master Protein	Q01518	Adenylyl cyclase-associated protein 1 OS=Homo sapiens OX=9606 GN=CAP1 PE=1 SV=5	0	390.801	73	34	3821	32	475	51.9	8.06	792.79	907.61	269.84	1472.89	1524.75	1508.75	28	26	19	28	31	29	10487	CAP1	hsa:10487; Q01518; Q53HR7; Q5T0S1; Q5T0S2; Q6I9U6	ENSG00000131236	Angiopoietin-like protein 8 regulatory pathway; Insulin signaling; Complement system in neuronal development and plasticity; Opioid receptor pathways	7	2	1591014822	1624927734	1726255939	2236817626	1052491685	1531424500	1514963658	1762398042	1981227626	684153162	1419521936	1490740911	1810229059	2598412437	1715722894	2639537011	1980148237	2950172503
High	Master Protein	P51991	Heterogeneous nuclear ribonucleoprotein A3 OS=Homo sapiens OX=9606 GN=HNRNPA3 PE=1 SV=2	0	390.602	55	33	4025	4	378	39.6	9.01	911.96	1083.34	409.09	1481.23	1771.48	1801.01	24	25	25	27	31	31	220988	HNRNPA3	D3DPF4; hsa:220988; P51991; Q53RW7; Q6URK5	ENSG00000170144		2	29	1837213127	2086722642	2747767893	2026458826	1656068856	2044015349	2519924937	2453453960	2085812603	7.67329e+08	1690470709	1667350459	1833576047	2092102948	2455122863	2109643121	2174319664	1049148007
High	Master Protein	O60437	Periplakin OS=Homo sapiens OX=9606 GN=PPL PE=1 SV=4	0	390.127	43	73	764	73	1756	204.6	5.6	150.26	65.05	62.22	170.16	500.97	223.52	41	19	23	31	69	34	5493	PPL	hsa:5493; O60314; O60437; O60454; Q14C98	ENSG00000118898		2	0	2.31386e+08	4.46971e+08	2.82079e+08	3.84817e+08	4.30795e+08	5.88579e+08	318026432	6.34121e+08	4.75667e+08	4.94458e+08	3.59515e+08	2.56175e+08	5.62394e+08	3.47436e+08	3.87933e+08	3.87864e+08	5.12192e+08	5.41169e+08
High	Master Protein	Q13228	Methanethiol oxidase OS=Homo sapiens OX=9606 GN=SELENBP1 PE=1 SV=2	0	388.664	67	33	4341	33	472	52.4	6.37	870.19	1185.07	397.76	1419.32	1558.55	2217.04	28	27	24	28	31	31	8991	SELENBP1	A6NML9; A6PVW9; B2RDR3; B4DKP6; B4E1F3; hsa:8991; Q13228; Q49AQ8; Q96GX7	ENSG00000143416	IL1 and megakaryocytes in obesity	1	0	3578544211	2485030671	2257940958	4401073562	5065199465	2252940801	1873757713	3415588015	1466740527	1567646504	3764106289	4185880286	2913175775	2371619148	4005581783	2122515905	2874278880	3212333340
High	Master Protein	P23246	Splicing factor, proline- and glutamine-rich OS=Homo sapiens OX=9606 GN=SFPQ PE=1 SV=2	0	386.863	51	41	4192	40	707	76.1	9.44	881.64	948.93	332.52	1606.13	1608.32	1578.35	34	28	26	37	40	36	6421	SFPQ	hsa:6421; P23246; P30808; Q5SZ71	ENSG00000116560	mRNA processing; Type 2 papillary renal cell carcinoma	4	1	1992663002	2771870920	3578754976	2540976202	3548715510	3825712779	3691520321	3879443995	5668370924	2151710226	2329414945	2526656361	3083397761	2452885512	2811481576	2267360226	2567092868	2123949157
High	Master Protein	Q9BX66-11	Isoform 11 of Sorbin and SH3 domain-containing protein 1 OS=Homo sapiens OX=9606 GN=SORBS1	0	386.709	36	49	2079	4	1266	139.3	7.42	513.27	759.04	235.25	771.79	860.61	661.37	35	44	32	36	40	33		SORBS1	Q9BX66-11			0	49	1189705502	9.72893e+08	4.16862e+08	7.77429e+08	4.96305e+08	6.64975e+08	9.67904e+08	8.63817e+08	5.9356e+08	3.22319e+08	751316729	539984986	5.707e+08	8.20754e+08	8.17669e+08	6.96294e+08	1051836170	1297936951
High	Master Protein	Q06830	Peroxiredoxin-1 OS=Homo sapiens OX=9606 GN=PRDX1 PE=1 SV=1	0	385.096	68	22	13469	18	199	22.1	8.13	3156.08	3397.12	1352.68	4987.63	5270.88	5784.61	22	22	21	22	22	22	5052	PRDX1	B5BU26; D3DPZ8; hsa:5052; P35703; Q06830; Q2V576; Q5T154; Q5T155	ENSG00000117450	Androgen receptor signaling pathway; Selenium micronutrient network; Nuclear receptors meta-pathway; NRF2 pathway	8	4	16253685038	18439819210	18919213417	15671481677	15854988356	16353470824	15063419337	15376730510	13487890528	21865828478	19189321490	14366732729	15753294141	17169618400	19373773384	15841192892	16261934565	14736276669
High	Master Protein	P30837	Aldehyde dehydrogenase X, mitochondrial OS=Homo sapiens OX=9606 GN=ALDH1B1 PE=1 SV=4	0	384.746	50	30	4783	26	517	57.2	6.99	988.11	1526.21	378.45	1915.73	2064.02	2879.14	29	27	27	28	29	30	219	ALDH1B1	B2R8F0; hsa:219; P30837; Q8WX76; Q9BV45	ENSG00000137124		1	2	3438255225	2011196665	1544358502	4214934542	1818780357	9.25314e+08	1904232904	6.65849e+08	3742189932	3666389753	4499127332	1659847518	3956172758	1538121754	3014526922	3551750818	2671259582	3371582751
High	Master Protein	Q15075	Early endosome antigen 1 OS=Homo sapiens OX=9606 GN=EEA1 PE=1 SV=2	0	384.525	43	62	1921	62	1411	162.4	5.68	425.5	403.05	161.76	824.01	795.23	785.14	36	35	32	50	52	52	8411	EEA1	hsa:8411; Q14221; Q15075	ENSG00000102189	VEGFA-VEGFR2 signaling	2	0	5738215899	8675426778	6495188221	4235673762	1627253011	1581437164	7065939991	1698551918	1183548596	11395370346	5341261836	3034658740	3538323995	4329620287	4687433491	4864353771	3562901362	2283284183
High	Master Protein	P69905	Hemoglobin subunit alpha OS=Homo sapiens OX=9606 GN=HBA1 PE=1 SV=2	0	383.522	80	18	9718	18	142	15.2	8.68	3200.06	3409.69	1143.6	3547.79	4177.11	2430.07	15	14	13	15	18	13	3039; 3040	HBA1; HBA2	hsa:3039; hsa:3040; P01922; P69905; Q1HDT5; Q3MIF5; Q53F97; Q96KF1; Q9NYR7; Q9UCM0	ENSG00000188536; ENSG00000206172	Selenium micronutrient network; Vitamin B12 metabolism; Folate metabolism; Effects of nitric oxide	9	0	64023619762	6460518210	47857163909	6992895462	2714020671	12541142060	12625391028	6862778846	18513587384	6.98496e+08	8243803934	6643891994	8666388533	12721881188	6304160616	4502530819	10732062357	6283982392
High	Master Protein	Q9Y4L1	Hypoxia up-regulated protein 1 OS=Homo sapiens OX=9606 GN=HYOU1 PE=1 SV=1	0	382.153	48	46	2174	45	999	111.3	5.22	300.76	340.09	154.48	694.38	767.31	729.16	31	30	32	39	40	45	10525	HYOU1	A8C1Z0; B7Z909; hsa:10525; Q2I204; Q53H25; Q9Y4L1	ENSG00000149428; ENSG00000280682	VEGFA-VEGFR2 signaling; 11p11.2 copy number variation syndrome	4	1	1134302095	1233039705	1433194319	1145183635	8.77681e+08	1312820071	9.30164e+08	1042273347	1792055842	1006864803	1027939023	7.73836e+08	1263317372	1292254407	1390874593	1258471180	945511873	1787319350
High	Master Protein	P02511	Alpha-crystallin B chain OS=Homo sapiens OX=9606 GN=CRYAB PE=1 SV=2	0	381	98	26	5035	26	175	20.1	7.33	1190.66	833.17	447.79	1249.02	2458.17	2105.29	23	16	20	21	25	25	1410	CRYAB	B0YIX0; hsa:1410; O43416; P02511; Q9UC37; Q9UC38; Q9UC39; Q9UC40; Q9UC41	ENSG00000109846		1	0	1991850524	1237836127	2440378993	2742996597	177784312	3.25035e+08	1011431205	3634486631	2237818790	2.7111e+08	1252840525	6.30018e+08	1498808141	2849601275	2433157310	1449666817	8.89767e+08	6.91913e+08
High	Master Protein	Q93052	Lipoma-preferred partner OS=Homo sapiens OX=9606 GN=LPP PE=1 SV=1	0	380.642	43	27	3825	27	612	65.7	7.37	1033.17	1337.33	408.71	1500.83	1753.12	1713.28	25	25	22	24	26	25	4026	LPP	A1L4L6; D3DNV6; hsa:4026; Q8NFX5; Q93052	ENSG00000145012	MFAP5 effect on permeability and motility of endothelial cells via cytoskeleton rearrangement	1	0	1925919237	1861631373	1561753214	1617597567	1051881803	1227012118	1178944458	1299264559	1343146406	1126583902	1269927192	1225360655	1345334772	1571121517	1730830778	2258255395	1716745705	6.42569e+08
High	Master Protein	P62258	14-3-3 protein epsilon OS=Homo sapiens OX=9606 GN=YWHAE PE=1 SV=1	0	379.036	78	27	7384	24	255	29.2	4.74	1419.95	1806.06	767.2	2290.09	2573.49	3295.95	25	25	23	27	26	26	7531	YWHAE	B3KY71; D3DTH5; hsa:7531; P29360; P42655; P62258; Q4VJB6; Q53XZ5; Q63631; Q7M4R4	ENSG00000108953; ENSG00000274474	Cell cycle; Myometrial relaxation and contraction pathways; VEGFA-VEGFR2 signaling; Calcium regulation in cardiac cells; Sudden infant death syndrome (SIDS) susceptibility pathways	25	0	4315517870	3581684841	6288641245	5582965182	4800690802	3530124962	3490329950	4678246529	3499225559	4059761314	3468642095	4332096173	3901199467	3003635366	4299608806	3388551792	3880342679	1616434477
High	Master Protein	P67936-2	Isoform 2 of Tropomyosin alpha-4 chain OS=Homo sapiens OX=9606 GN=TPM4	0	377.092	67	42	3922	3	284	32.7	4.73	929.5	1014.21	400.34	1532.8	1290.94	1149.6	39	33	31	35	36	29		TPM4	P67936-2			0	0	4.93605e+07	4.77593e+07	3.51602e+07	4.15153e+07	1.40261e+07	9.76416e+06	1.9374e+07	2.2678e+07	6.68469e+06	2.31125e+06	6.61233e+07	1.60222e+07	1.9299e+07	9.88682e+06	1.99838e+07	8.82453e+06	3.5233e+07	1.85226e+07
High	Master Protein	P31937	3-hydroxyisobutyrate dehydrogenase, mitochondrial OS=Homo sapiens OX=9606 GN=HIBADH PE=1 SV=2	0	376.426	51	22	4324	22	336	35.3	8.13	1450.85	1774.86	641.73	2277.25	2223.75	2900.88	15	14	14	21	16	19	11112	HIBADH	hsa:11112; P31937; Q546Z2; Q9UDN3	ENSG00000106049	Amino acid metabolism	2	0	2031614145	1278552548	2115676034	4071045144	1814407896	1105593182	1741110242	1675704372	1227944246	8.18477e+08	2328747355	2274653513	1828322106	1521662711	2364561857	989195897	1562610790	2520100069
High	Master Protein	Q9Y6C2	EMILIN-1 OS=Homo sapiens OX=9606 GN=EMILIN1 PE=1 SV=3	0	374.97	42	42	5020	42	1016	106.6	5.17	1404.02	1665.23	687.09	2622.46	2293.67	1852.39	35	37	32	40	40	35	11117	EMILIN1	A0A0C4DFX3; A5PL03; H0Y7A0; hsa:11117; Q53SY9; Q96G58; Q96IH6; Q9UG76; Q9Y6C2	ENSG00000138080		1	0	4651366263	5321350504	3365943844	2786682237	1575623511	3309552506	4140037910	5141431731	4579079096	2190321021	4478431519	2290908284	3691144857	3324080808	4385837154	8431240665	4688066618	4014237965
High	Master Protein	P01008	Antithrombin-III OS=Homo sapiens OX=9606 GN=SERPINC1 PE=1 SV=1	0	373.139	57	28	4136	28	464	52.6	6.71	979.59	1241.03	499.94	1698.01	1758.25	992.81	20	21	20	24	27	21	462	SERPINC1	B2R6P0; hsa:462; P01008; P78439; P78447; Q13815; Q5TC78; Q7KZ43; Q7KZ97; Q9UC78	ENSG00000117601	Complement and coagulation cascades	5	0	1768567609	1560917519	1206397249	1463689393	3.85017e+08	8.86108e+08	1922986274	1515345450	1617553032	6.88205e+08	1070373630	1311502484	1654150484	1654768793	1400435487	1668837957	2978130044	2330256641
High	Master Protein	P31040	Succinate dehydrogenase [ubiquinone] flavoprotein subunit, mitochondrial OS=Homo sapiens OX=9606 GN=SDHA PE=1 SV=2	0	372.888	67	38	5316	38	664	72.6	7.39	1203.76	1420.49	380.61	1796.04	1634.44	2412.17	31	28	26	29	31	35	6389	SDHA	A8K5J6; B4DJ60; E9PBJ5; hsa:6389; P31040; Q16395; Q59GW8; Q8IW48; Q9UMY5	ENSG00000073578	Electron transport chain: OXPHOS system in mitochondria; TCA cycle and deficiency of pyruvate dehydrogenase complex (PDHc); Amino acid metabolism; Nonalcoholic fatty liver disease; Mitochondrial complex II assembly; Arsenic metabolism and reactive oxygen species generation; TCA cycle (aka Krebs or citric acid cycle)	9	0	3838472223	4211545238	7523323292	5989956577	6194529570	5098053012	5798748613	5527366297	6712559907	10003580173	5490070596	5408098322	4953533755	3788085120	4903556212	2608529499	3454099587	2074775974
High	Master Protein	O94925	Glutaminase kidney isoform, mitochondrial OS=Homo sapiens OX=9606 GN=GLS PE=1 SV=1	0	370.662	54	32	3825	9	669	73.4	7.77	939.68	1103.07	278.46	1486.22	1441.31	1967.49	26	26	17	26	31	29	2744	GLS	hsa:2744; O94925; Q9UL05; Q9UL06; Q9UL07; Q9UN40	ENSG00000115419	Amino acid metabolism; Metabolic reprogramming in colon cancer; Neuroinflammation and glutamatergic signaling; Amino acid metabolism in triple-negative breast cancer cells	7	28	1396894678	1637947232	1920264161	2504227079	2292421305	1428267056	1938793856	1893005333	1932442762	2240530959	2077409492	2425677292	1441584008	1621091381	2149041688	1305870902	1240645515	1163701382
High	Master Protein	O94760	N(G),N(G)-dimethylarginine dimethylaminohydrolase 1 OS=Homo sapiens OX=9606 GN=DDAH1 PE=1 SV=3	0	370.612	77	27	6129	26	285	31.1	5.81	1602.4	1708.53	568.81	2330.83	2527.19	2999.96	22	23	18	21	26	25	23576	DDAH1	hsa:23576; O94760; Q5HYC8; Q86XK5	ENSG00000153904	Mesodermal commitment pathway; Nitric oxide metabolism in cystic fibrosis	3	1	5217405016	4062025749	8269620694	7133065418	3066865367	4130347162	6398697758	4581841152	7557316971	4614095850	5270545440	6064111447	5243583416	3711289625	5311684698	2558426921	4874022641	2897665948
High	Master Protein	P15924	Desmoplakin OS=Homo sapiens OX=9606 GN=DSP PE=1 SV=3	0	368.55	28	80	1247	80	2871	331.6	6.81	188.25	237.91	11.95	365.07	389	406.42	36	57	16	51	56	67	1832	DSP	B2RTT2; D7RX09; hsa:1832; O75993; P15924; Q14189; Q9UHN4	ENSG00000096696	Arrhythmogenic right ventricular cardiomyopathy; Lung fibrosis; Epithelial to mesenchymal transition in colorectal cancer	9	0	8.64032e+08	1434436564	850247625	9.55325e+08	1626748432	2362803416	1086349628	1394661584	1622201709	1700609008	1452101674	1244313207	2103065459	1388422119	1161352554	1006700394	1161074539	1364782450
High	Master Protein	P21281	V-type proton ATPase subunit B, brain isoform OS=Homo sapiens OX=9606 GN=ATP6V1B2 PE=1 SV=3	0	368.539	53	29	4719	17	511	56.5	5.81	1300.91	1602.64	352.28	2050.11	1902.02	2672.02	23	25	21	27	25	27	526	ATP6V1B2	B2R5Z3; D3DSQ5; hsa:526; P21281; Q14544; Q15859; Q96IR0	ENSG00000147416		5	18	2160896050	2103029132	2641668890	2939937757	4539187898	3449467392	3275667730	2378897167	3071217218	3120242041	3120876520	4359568091	3098852839	2273901360	2679621369	1509215611	1744984966	2311868509
High	Master Protein	P34932	Heat shock 70 kDa protein 4 OS=Homo sapiens OX=9606 GN=HSPA4 PE=1 SV=4	0	368.18	51	40	2203	38	840	94.3	5.19	375.87	467.07	96.79	704.82	650.91	887.71	32	30	19	34	32	37	3308	HSPA4	hsa:3308; O95756; P34932; Q2TAL4; Q9BUK9	ENSG00000170606	Parkin-ubiquitin proteasomal system pathway	2	2	8.9567e+08	1054582236	8.96814e+08	1144336441	1106675935	1165887299	1081787500	8.76577e+08	6.37067e+08	7.70834e+08	9.75432e+08	7.3433e+08	8.09744e+08	1378295461	1119480802	9.90994e+08	1136412387	1390986257
High	Master Protein	P07951-3	Isoform 3 of Tropomyosin beta chain OS=Homo sapiens OX=9606 GN=TPM2	0	367.412	66	35	3928	9	248	28.7	4.63	1072.52	1216.62	504.35	1672.86	1394.85	1236.66	34	29	28	29	28	27		TPM2	P07951-3			0	0	1089920890	9.72007e+08	3.03344e+08	3.91339e+08	3.85163e+08	1.77119e+08	307125709	5.12869e+08	4.09278e+08	5.9299e+08	2.20322e+08	1.93508e+08	1.22143e+08	2.82498e+08	2.94249e+08	8.75931e+08	3.84451e+08	3.13473e+08
High	Master Protein	Q15063-4	Isoform 4 of Periostin OS=Homo sapiens OX=9606 GN=POSTN	0	366.891	51	38	1880	2	751	83.8	8.18	340.81	586.05	59.71	1344.1	499.41	355.69	25	28	16	38	29	25		POSTN	Q15063-4			0	3	7.3376e+07	214492544	6.90171e+07	1.11312e+08	5.99426e+06	124475842	2.14106e+08	5.39284e+07	114488396	1.07949e+08	9.23185e+07	59167358	2.37058e+08	1.73228e+08	2.50145e+08	2.46226e+08	4.70634e+07	9.13529e+07
High	Master Protein	P14550	Aldo-keto reductase family 1 member A1 OS=Homo sapiens OX=9606 GN=AKR1A1 PE=1 SV=3	0	366.665	73	31	8846	30	325	36.6	6.79	1890.27	2267.34	632.37	3217.51	3007.3	3698.2	27	29	21	28	27	27	10327	AKR1A1	A8KAL8; D3DQ04; hsa:10327; P14550; Q6IAZ4	ENSG00000117448	Benzo(a)pyrene metabolism; Metapathway biotransformation Phase I and II	4	2	5894209729	3648263423	5500193300	10373907363	4623700024	3254049179	5354648708	3908038105	3944847894	3715807765	5279810992	9783555373	6116803181	3636254042	5383256725	3004368742	4689596358	6189781519
High	Master Protein	P30039	Phenazine biosynthesis-like domain-containing protein OS=Homo sapiens OX=9606 GN=PBLD PE=1 SV=2	0	366.621	86	24	3349	24	288	31.8	6.52	670.54	966.45	266.67	1333.3	988.61	1814.09	20	21	18	23	20	24	64081	PBLD	A8MZJ3; C9JIM0; hsa:64081; P30039; Q9HCC2	ENSG00000108187		0	0	2621588778	8.77488e+08	1871318405	3078089456	1791634964	7.73593e+08	1391208942	1208281935	1002002778	1393913762	1757366597	2744469072	1498418279	1352969602	1726650809	1009883997	8.74009e+08	1110021074
High	Master Protein	Q0VF96	Cingulin-like protein 1 OS=Homo sapiens OX=9606 GN=CGNL1 PE=1 SV=2	0	365.757	43	56	1919	56	1302	149	5.67	293.65	332.04	114.3	534.14	494.68	1012.48	42	39	31	46	48	53	84952	CGNL1	hsa:84952; Q05BZ4; Q0VF96; Q52LR0; Q695C7; Q7Z2L3; Q96JV2; Q96MN6; Q9C0B4	ENSG00000128849	VEGFA-VEGFR2 signaling	1	0	1322691272	1680345823	2031964779	1445100385	1703143703	1588113519	2501854861	2180808522	2202550995	1503440272	1617569530	1187960584	1394409591	1261066104	1588557387	7.24314e+08	1182503551	9.06274e+08
High	Master Protein	Q16555	Dihydropyrimidinase-related protein 2 OS=Homo sapiens OX=9606 GN=DPYSL2 PE=1 SV=1	0	364.917	56	30	4553	26	572	62.3	6.38	1422.39	1527.69	512.61	2034.47	2119.06	1968.98	26	26	21	25	29	27	1808	DPYSL2	A8K5H2; B4DR31; D3DSS7; hsa:1808; O00424; Q16555	ENSG00000092964	Microtubule cytoskeleton regulation; Brain-derived neurotrophic factor (BDNF) signaling pathway	4	6	2190839098	2583938525	1879079130	2705495312	1755946066	2199845382	2627418708	2214952685	1841534104	1400059154	2243322140	2352993015	3307057682	2578822471	2217957441	2470471333	3012155727	2496610541
High	Master Protein	P07942	Laminin subunit beta-1 OS=Homo sapiens OX=9606 GN=LAMB1 PE=1 SV=2	0	364.893	26	52	2909	52	1786	197.9	4.94	504.75	577.01	283.98	1053.3	840.9	906.99	39	38	36	49	43	49	3912	LAMB1	hsa:3912; P07942; Q14D91	ENSG00000091136	Alpha 6 beta 4 signaling pathway; Complement system; Focal adhesion; Focal adhesion: PI3K-Akt-mTOR-signaling pathway; PI3K-Akt signaling pathway; Inflammatory response pathway; Small cell lung cancer; Malignant pleural mesothelioma	17	0	1694349599	2123703344	1553300740	1498491171	2008880850	1547512486	3621669210	2130683805	1520740530	2082645918	2006376690	1188841921	1807211800	2037868492	2097129740	2124830992	2150002874	1065181256
High	Master Protein	P17174	Aspartate aminotransferase, cytoplasmic OS=Homo sapiens OX=9606 GN=GOT1 PE=1 SV=3	0	361.974	76	33	4453	33	413	46.2	7.01	934.22	1046.62	330.89	1415.65	1632.59	1973.47	32	28	24	30	31	32	2805	GOT1	B2R6R7; B7Z7E9; hsa:2805; P17174; Q5VW80	ENSG00000120053	Alanine and aspartate metabolism; Trans-sulfuration pathway; Amino acid metabolism; NAD metabolism in oncogene-induced senescence and mitochondrial dysfunction-associated senescence; TCA cycle in senescence; Neuroinflammation and glutamatergic signaling; Glycolysis and gluconeogenesis	10	0	2484496687	2757677383	2478753443	3836049310	2306647107	2553630989	2193924490	2394089589	3916532796	1834621199	2544867727	4607470790	3393407999	2401057559	2763373752	2271466860	2414581395	2232970330
High	Master Protein	Q5SZK8	FRAS1-related extracellular matrix protein 2 OS=Homo sapiens OX=9606 GN=FREM2 PE=1 SV=3	0	361.577	21	51	1422	51	3169	350.9	5.03	368.01	364.46	17.32	728.5	438.38	791.21	41	35	10	46	37	47	341640	FREM2	hsa:341640; Q4QQG1; Q5H9N8; Q5SZK8; Q5T6Q1; Q6N057; Q6ZSB4; Q7Z305; Q7Z341	ENSG00000150893	Development of ureteric collection system	1	0	2.75108e+08	3.89852e+08	6.75908e+08	5.93381e+08	8.11943e+08	9.27029e+08	8.56868e+08	6.7642e+08	1196869818	5.26912e+08	318882130	6.14569e+08	378496002	8.75917e+08	5.66063e+08	1959270097	8.73283e+08	9.53286e+08
High	Master Protein	Q13509	Tubulin beta-3 chain OS=Homo sapiens OX=9606 GN=TUBB3 PE=1 SV=2	0	361.112	52	25	11816	5	450	50.4	4.93	2877.26	3486.9	1105.6	5032.71	4946.56	5515.8	21	19	17	21	23	24	10381	TUBB3	A8K854; hsa:10381; Q13509; Q9BTZ0; Q9BW10	ENSG00000258947	Alzheimer's disease and miRNA effects; Pathogenic Escherichia coli infection; Parkin-ubiquitin proteasomal system pathway; Exercise-induced circadian regulation; Alzheimer's disease	35	3	8.32035e+07	1.31625e+08	1.65566e+07	7.18115e+07	1.14434e+08	1.06496e+08	8.03278e+08	7.2561e+07	5.15974e+07	2.58258e+07	1.20504e+08	8.10356e+07	7.67198e+07	1.60305e+08	1.35309e+08	8.94215e+07	1.02721e+08	9.55737e+07
High	Master Protein	P51991-2	Isoform 2 of Heterogeneous nuclear ribonucleoprotein A3 OS=Homo sapiens OX=9606 GN=HNRNPA3	0	361.079	53	31	3239	2	356	37	8.31	731.01	906.4	359.23	1237.23	1493.16	1482.9	21	22	22	24	29	28		HNRNPA3	P51991-2			0	0	3.88473e+07	3.93739e+07	1.95523e+08	1.00573e+08	9.09808e+06	4.37156e+06	6.60522e+07	7.92162e+07	5.77856e+07	6.055e+06	2.71372e+07	6.31064e+07	6.19413e+07	4.30003e+07	6.15924e+07	2.42959e+07	1.00624e+08	2.59755e+07
High	Master Protein	P40926	Malate dehydrogenase, mitochondrial OS=Homo sapiens OX=9606 GN=MDH2 PE=1 SV=3	0	359.397	74	31	8040	31	338	35.5	8.68	2028.59	2438.6	762.44	3854.25	3112.95	4060.21	28	27	22	29	28	30	4191	MDH2	A8K414; B2RE78; B4DE44; E9PDB2; hsa:4191; O43682; P40926	ENSG00000146701	Amino acid metabolism; Metabolic reprogramming in colon cancer; NAD metabolism in oncogene-induced senescence and mitochondrial dysfunction-associated senescence; Glycolysis and gluconeogenesis; TCA cycle (aka Krebs or citric acid cycle)	7	0	5465146076	4683149180	8950653353	8416590710	11611213648	5621808153	9262396995	7628038184	4910474115	4424012541	8781677997	10314417588	8877184106	4812225721	7315909794	3007208002	4985997661	6493495182
High	Master Protein	Q92597	Protein NDRG1 OS=Homo sapiens OX=9606 GN=NDRG1 PE=1 SV=1	0	359.32	52	17	2648	17	394	42.8	5.82	821.06	858.96	289.19	1050.71	1141.14	1671.95	15	13	12	15	16	16	10397	NDRG1	B3KR80; B7Z446; hsa:10397; O15207; Q6IBG2; Q92597; Q9NYR6; Q9UK29	ENSG00000104419	Androgen receptor network in prostate cancer; VEGFA-VEGFR2 signaling; Hippo-YAP signaling; Leukocyte-intrinsic Hippo pathway functions; Intracellular trafficking proteins involved in CMT neuropathy; Malignant pleural mesothelioma; A network map of Macrophage-stimulating protein (MSP) signaling	8	0	1308648857	7.28464e+08	2139155473	1927190427	1597088776	1418890149	1240343666	9.20944e+08	786592789	2161235400	1410535899	1415410167	1165939754	7.22944e+08	1050413620	1074635698	9.36742e+08	3.94307e+08
High	Master Protein	P06744	Glucose-6-phosphate isomerase OS=Homo sapiens OX=9606 GN=GPI PE=1 SV=4	0	358.707	56	35	5861	35	558	63.1	8.32	1250.87	1389.46	410.07	1930.59	1846.87	2246.61	32	28	26	31	32	33	2821	GPI	B4DG39; hsa:2821; P06744; Q9BRD3; Q9BSK5; Q9UHE6	ENSG00000105220	Cori cycle; Clear cell renal cell carcinoma pathways; Metabolic reprogramming in colon cancer; Aerobic glycolysis; N-glycan biosynthesis; Disorders of fructose metabolism; Glycolysis and gluconeogenesis	11	0	3502202817	6597101293	3225957217	6253372218	6109910349	5598447490	4702673830	5314955370	5116212431	4266741009	4197235373	6518773364	6574621663	6368319196	5118762113	4695136465	6128547083	2307173878
High	Master Protein	P04075	Fructose-bisphosphate aldolase A OS=Homo sapiens OX=9606 GN=ALDOA PE=1 SV=2	0	357.418	73	34	7729	31	364	39.4	8.09	2095.61	2123.98	777.86	3265.78	3644.94	3591.83	31	29	27	32	31	32	226	ALDOA	B4DXI7; hsa:226; P04075; Q6FH76; Q6FI10; Q96B15; Q9BWD9; Q9UCN2	ENSG00000149925	VEGFA-VEGFR2 signaling; Clear cell renal cell carcinoma pathways; Aerobic glycolysis; 16p11.2 proximal deletion syndrome; Glycolysis and gluconeogenesis; Sudden infant death syndrome (SIDS) susceptibility pathways	10	2	7852792716	9163217479	8351179814	6660734773	6597879659	7419672432	6126581553	8405195701	7217156104	5157473691	5956842989	6259891722	8303362720	7527157151	7448336199	6236916287	8437035061	3856508856
High	Master Protein	P51911	Calponin-1 OS=Homo sapiens OX=9606 GN=CNN1 PE=1 SV=2	0	356.928	66	28	1841	28	297	33.2	9.07	599.1	1037.34	297.13	318.12	778.17	226.13	21	26	17	15	26	15	1264	CNN1	B2R868; B4DUX6; hsa:1264; O00638; P51911; Q15416; Q8IY93; Q99438	ENSG00000130176	Endothelin pathways; Myometrial relaxation and contraction pathways	2	0	4839118530	4454402334	7.5693e+08	1433516819	1165889283	9.0286e+08	3.54122e+08	1666448862	9.26778e+08	1140728136	9.2081e+08	1303430119	1292416466	1442663480	1355597287	2194769471	1645002451	1026387115
High	Master Protein	P07195	L-lactate dehydrogenase B chain OS=Homo sapiens OX=9606 GN=LDHB PE=1 SV=2	0	356.674	52	31	10429	28	334	36.6	6.05	2346.09	2591.74	854.59	3578.22	3615.51	4143.7	28	27	24	29	31	29	3945	LDHB	hsa:3945; P07195	ENSG00000111716	Clear cell renal cell carcinoma pathways; CCL18 signaling pathway; Glycolysis and gluconeogenesis	4	3	11693325455	19664048679	13057425209	15608133271	24264901126	15732258951	15655980312	16170252254	20165732773	23728935256	15525861202	17902915856	12045246415	17197188073	15514540954	11848906566	11511448138	6316706774
High	Master Protein	P36776	Lon protease homolog, mitochondrial OS=Homo sapiens OX=9606 GN=LONP1 PE=1 SV=2	0	352.457	42	37	2367	37	959	106.4	6.39	470.28	623.94	143.44	833.46	622.97	1252.35	31	33	24	33	32	36	9361	LONP1	B3KPH8; D6W635; E5KMH8; F5GZ27; hsa:9361; P36776; P36777; Q8N8K8; Q9UQ95	ENSG00000196365		0	0	7.89503e+08	8.84648e+08	993964442	1522789975	2085420513	1540163159	1572122841	9.92541e+08	1366656482	1410975291	1353162895	1726202143	1278723005	9.23256e+08	1121814913	8.6683e+08	959069161	8.95134e+08
High	Master Protein	O00515	Ladinin-1 OS=Homo sapiens OX=9606 GN=LAD1 PE=1 SV=2	0	352.318	61	38	3330	38	517	57.1	9.67	745.27	950.3	296.2	1287.83	1484.92	1594.71	28	32	27	35	33	35	3898	LAD1	hsa:3898; O00515; O95614; Q96GD8	ENSG00000159166		0	0	1134863852	1198795131	1436703935	1365501466	1307798383	1210843695	2058879470	1648040151	3059111976	9.45566e+08	1384773669	1051725139	1293743845	1223779612	1381823959	9.82248e+08	1492237628	985443898
High	Master Protein	P07954	Fumarate hydratase, mitochondrial OS=Homo sapiens OX=9606 GN=FH PE=1 SV=3	0	351.709	61	33	3492	33	510	54.6	8.76	767.64	1053.93	413.17	1372.04	1297.85	1789.57	26	29	25	31	30	31	2271	FH	B1ANK7; hsa:2271; P07954	ENSG00000091483	TCA cycle and deficiency of pyruvate dehydrogenase complex (PDHc); Amino acid metabolism; Krebs cycle disorders; Type 2 papillary renal cell carcinoma; Metabolic reprogramming in colon cancer; TCA cycle in senescence; TCA cycle (aka Krebs or citric acid cycle)	8	0	2788565056	3846160258	4452953948	5055662312	3045134381	2073808886	5398734105	2823545741	2303627551	2535325530	4102230186	6072092191	4269301391	2963139799	3235292871	1773625803	3517075471	2436737822
High	Master Protein	P09429	High mobility group protein B1 OS=Homo sapiens OX=9606 GN=HMGB1 PE=1 SV=3	0	351.063	57	23	4647	15	215	24.9	5.74	882.6	1074.24	375.12	1552.75	1631.09	1935.89	21	20	18	21	20	23	3146	HMGB1	A5D8W9; hsa:3146; P09429; Q14321; Q5T7C3; Q6IBE1	ENSG00000189403	Retinoblastoma gene in cancer; VEGFA-VEGFR2 signaling; Supression of HMGB1 mediated inflammation by THBD; Base excision repair; DNA repair pathways, full network; Malignant pleural mesothelioma; Clock-controlled autophagy in bone metabolism; Autophagy in pancreatic ductal adenocarcinoma; DNA damage response (only ATM dependent)	20	12	2342219409	2297765906	5844005087	3522778780	6.59507e+08	3367736268	4342778653	2578602225	5508263026	9.84058e+08	1910229507	2686369198	3122357274	2199500183	2768345020	2629416523	3056163065	829009073
High	Master Protein	P53597	Succinate--CoA ligase [ADP/GDP-forming] subunit alpha, mitochondrial OS=Homo sapiens OX=9606 GN=SUCLG1 PE=1 SV=4	0	351.011	42	18	4540	18	346	36.2	8.79	1002.2	1154.74	391.33	1564.63	1559.42	2194.56	14	14	13	17	17	17	8802	SUCLG1	hsa:8802; P53597; Q9BWB0; Q9UNP6	ENSG00000163541	Amino acid metabolism; TCA cycle (aka Krebs or citric acid cycle)	3	0	2013035665	1185931203	6167214158	5199407417	1688134468	2189207032	4436246250	6379911065	5972630706	1156354052	1765449287	3113471691	2178659346	9.53287e+08	2046716778	7.07405e+08	1342719317	1216308480
High	Master Protein	P08195-2	Isoform 2 of 4F2 cell-surface antigen heavy chain OS=Homo sapiens OX=9606 GN=SLC3A2	0	350.34	53	32	3212	32	529	57.9	5.35	701.57	944.09	142.95	1276.72	1156.18	1805.89	26	29	20	29	28	30		SLC3A2	P08195-2			0	0	1204969272	1095668184	1458661197	2506360144	1202723925	8.2541e+08	3607297918	9.43786e+08	1762367717	1572896622	1693004206	1463348411	7.12871e+08	1221220801	1831744714	7.02562e+08	9.48324e+08	1393140264
High	Master Protein	Q7Z406	Myosin-14 OS=Homo sapiens OX=9606 GN=MYH14 PE=1 SV=2	0	349.794	32	57	3230	42	1995	227.7	5.6	976.87	1076.22	281.02	1617.6	1442.91	1398.97	33	24	17	35	50	41	79784	MYH14	B0I1S2; C3TTN4; hsa:79784; Q5CZ75; Q6XYE4; Q76B62; Q7Z406; Q8WV23; Q96I22; Q9BT27; Q9BW35; Q9H882	ENSG00000105357		6	0	3.14472e+08	3.58038e+08	3.46963e+08	3.74989e+08	2.96667e+08	1.92928e+08	169987542	3.86836e+08	1.51512e+08	2.54056e+08	291847567	2.28344e+08	2.44912e+08	4.03378e+08	3.75894e+08	1.40785e+08	2.70653e+08	1.62241e+08
High	Master Protein	O14745	Na(+)/H(+) exchange regulatory cofactor NHE-RF1 OS=Homo sapiens OX=9606 GN=NHERF1 PE=1 SV=4	0	348.304	83	37	7758	36	358	38.8	5.77	2095.46	2381.23	816.52	3362.41	3239.75	3828.71	29	30	24	30	32	34	9368	NHERF1	B3KY21; hsa:9368; O14745; O43552; Q86WQ5	ENSG00000109062		0	1	8997774736	7193429212	12168198609	10420933405	17569761719	9613800653	11574686944	12342657616	7834704793	7947347156	12332084097	10395786029	9209363003	5134755409	8594303128	2710567940	5741230643	5546163567
High	Master Protein	Q8NE62	Choline dehydrogenase, mitochondrial OS=Homo sapiens OX=9606 GN=CHDH PE=1 SV=2	0	345.705	53	34	3065	34	594	65.3	8.28	595.47	747.78	193.06	953.93	809.61	1279.69	27	29	23	28	28	33	55349	CHDH	hsa:55349; Q8NE62; Q9NY17	ENSG00000016391	Trans-sulfuration, one-carbon metabolism and related pathways; Methionine de novo and salvage pathway	3	0	1131520649	1306994944	2744941152	2907571050	3058762131	2380630962	2353938212	2410290092	2382970077	1898599758	2721345423	3277307819	2686261808	1141243837	2658133996	7.25957e+08	1879158711	1187178115
High	Master Protein	P18669	Phosphoglycerate mutase 1 OS=Homo sapiens OX=9606 GN=PGAM1 PE=1 SV=2	0	345.084	65	22	4193	9	254	28.8	7.18	1072.4	1265.71	426.72	1395.28	1842.97	2174.39	19	16	13	19	22	19	5223	PGAM1	hsa:5223; P18669; Q9BWC0	ENSG00000171314	Cori cycle; Metabolic reprogramming in colon cancer; Glycolysis and gluconeogenesis	6	18	1677837257	1320918906	2326092137	2953782209	5.31492e+08	1351669834	2003270639	1813604588	2406908984	4.4765e+08	1095784859	2316948125	2242256059	1132507323	1338502042	1044788081	1379125783	1359295811
High	Master Protein	P09493-5	Isoform 5 of Tropomyosin alpha-1 chain OS=Homo sapiens OX=9606 GN=TPM1	0	345.056	73	39	3909	7	245	28.4	4.77	1074.76	1167.79	491.51	1811.94	1546.15	1417.5	37	29	28	33	34	32		TPM1	P09493-5			0	0	4.43285e+08	4.45152e+08	752115449	3.88167e+08	6.81717e+08	4.71176e+08	7.77409e+08	6.55896e+08	1028951977	4.19487e+08	4.38088e+08	2.34979e+08	2.99101e+08	3.8617e+08	4.39704e+08	4.17855e+08	3.72511e+08	1.95822e+08
High	Master Protein	P21810	Biglycan OS=Homo sapiens OX=9606 GN=BGN PE=1 SV=2	0	343.833	61	29	4200	28	368	41.6	7.52	1028.98	912.31	395.71	1772.73	1653.89	2302.09	23	20	16	28	25	25	633	BGN	D3DWU3; hsa:633; P13247; P21810	ENSG00000182492		11	0	2452036771	3100364335	2516680668	4444396579	4.41861e+08	9.17424e+08	8.46464e+08	1455739391	5.31724e+08	220147316	1567233694	9.23516e+08	1415208413	1154831647	2063774253	2975549429	2521796368	2071621729
High	Master Protein	O75309	Cadherin-16 OS=Homo sapiens OX=9606 GN=CDH16 PE=1 SV=1	0	343.052	51	27	3247	27	829	89.9	4.96	777.32	901.74	409.13	1135.96	1311.1	1741.4	21	20	21	23	27	24	1014	CDH16	B4DPA8; H3BPD3; hsa:1014; O75309; Q6UW93	ENSG00000166589	TGF-beta signaling in thyroid cells for epithelial-mesenchymal transition; Hippo signaling regulation pathways; Hippo-Merlin signaling dysregulation; Malignant pleural mesothelioma	4	0	8.70137e+08	8.54703e+08	1021064969	1681227789	1411535793	1660344272	1271036031	1182781859	2164360715	1349501741	9.7956e+08	9.08771e+08	805349698	1017379321	8.82346e+08	6.94738e+08	730064004	7.2019e+08
High	Master Protein	P05166	Propionyl-CoA carboxylase beta chain, mitochondrial OS=Homo sapiens OX=9606 GN=PCCB PE=1 SV=3	0	342.791	59	27	4467	27	539	58.2	7.64	997.35	1344.95	421.62	1741.24	1584.97	2071.39	22	22	20	24	24	26	5096	PCCB	B7Z2Z4; hsa:5096; P05166; Q16813; Q96CX0	ENSG00000114054	Primary ovarian insufficiency	4	0	2222815378	1645370742	2992662673	3407251714	2751773725	1998112914	2701472223	2052178277	2325153518	1733342796	2544879226	3430683144	2678224720	1291417109	2337382027	1107329571	1381118378	3299451443
High	Master Protein	P23378	Glycine dehydrogenase (decarboxylating), mitochondrial OS=Homo sapiens OX=9606 GN=GLDC PE=1 SV=2	0	342.22	28	31	986	31	1020	112.7	7.11	236.77	277.68	70.28	381.76	313.41	687.43	27	24	14	25	24	29	2731	GLDC	hsa:2731; P23378; Q2M2F8	ENSG00000178445		1	0	7.43475e+08	7.10588e+08	3.28872e+08	7.01332e+08	7.40306e+08	2.70477e+08	3.8222e+08	6.07358e+08	168351933	285265323	8.25946e+08	7.89789e+08	3.70616e+08	7.69845e+08	7.08125e+08	1.71141e+08	3.59324e+08	3.32895e+08
High	Master Protein	P06753	Tropomyosin alpha-3 chain OS=Homo sapiens OX=9606 GN=TPM3 PE=1 SV=2	0	341.418	66	37	3656	4	285	32.9	4.72	953.39	965.82	406.92	1575.32	1329.25	1230.4	34	26	26	30	32	30	7170	TPM3	D3DV71; hsa:7170; P06753; P12324; Q2QD06; Q5VU58; Q5VU63; Q5VU66; Q5VU71; Q5VU72; Q8TCG3; Q969Q2; Q9NQH8	ENSG00000143549	Mammary gland development pathway - Pregnancy and lactation (Stage 3 of 4); Striated muscle contraction pathway; VEGFA-VEGFR2 signaling	7	0	1.7511e+08	1.46551e+08	3.24103e+08	1.48487e+08	2.23927e+08	1.19254e+08	3.58728e+08	1.69325e+08	1.34234e+07	129316068	1.59345e+08	1.05811e+08	1.31442e+08	2.01245e+08	2.12754e+08	9.66787e+07	1.79945e+08	7.08713e+07
High	Master Protein	Q9Y6U3	Scinderin OS=Homo sapiens OX=9606 GN=SCIN PE=1 SV=4	0	340.157	54	36	1918	36	715	80.4	5.71	521.82	308.71	151.41	590.92	889.58	830.39	30	26	27	30	35	31	85477	SCIN	A8K2U8; hsa:85477; Q8NBZ6; Q8WU97; Q96JC7; Q96PY2; Q9Y6U3	ENSG00000006747	Ebola virus infection in host; Endochondral ossification; Endochondral ossification with skeletal dysplasias	3	0	5.11884e+08	1110270226	7.74049e+08	5.02004e+08	1327513190	1098164528	9.12582e+08	1138690274	1140788956	8.97332e+08	5.52492e+08	9.41456e+08	1132526253	1450791206	4.88166e+08	1195098042	1574498340	1199413303
High	Master Protein	P45954	Short/branched chain specific acyl-CoA dehydrogenase, mitochondrial OS=Homo sapiens OX=9606 GN=ACADSB PE=1 SV=1	0	339.099	55	25	3758	25	432	47.5	6.99	907.11	1123.63	392.72	1434.87	1369.3	1740.63	20	20	18	21	20	23	36	ACADSB	B4DQ51; hsa:36; P45954; Q5SQN6; Q96CX7	ENSG00000196177	Valproic acid pathway	2	0	3936611423	5434221805	4025427518	4476318574	4528159786	2475843342	3726430724	2522669548	2209240152	2344735266	5804523585	6217623614	3342525638	6213963617	3868054287	4055427898	2170100892	1749299741
High	Master Protein	Q14117	Dihydropyrimidinase OS=Homo sapiens OX=9606 GN=DPYS PE=1 SV=1	0	337.407	55	27	4008	26	519	56.6	7.27	877.6	1180.32	247.74	1403.7	1274.6	2159.08	22	20	17	24	21	21	1807	DPYS	hsa:1807; Q14117	ENSG00000147647	Fluoropyrimidine activity; Pyrimidine metabolism	3	0	942891755	9.94352e+08	1556689200	2466796689	1881485250	1365187448	1743061427	1764570043	1882563352	1460507690	1627145567	2614467600	1418538330	6.81227e+08	1007766831	2.80574e+08	8.88409e+08	9.93146e+08
High	Master Protein	P04792	Heat shock protein beta-1 OS=Homo sapiens OX=9606 GN=HSPB1 PE=1 SV=2	0	336.705	98	26	9532	26	205	22.8	6.4	2213.14	2923.81	1123.96	4162.99	4572.29	4528.97	24	23	21	22	26	23	3315	HSPB1	B2R4N8; hsa:3315; P04792; Q6FI47; Q96C20; Q96EI7; Q9UC31; Q9UC34; Q9UC35; Q9UC36	ENSG00000106211	Apoptosis-related network due to altered Notch3 in ovarian cancer; Fas ligand pathway and stress induction of heat shock proteins; MAPK signaling pathway; ATM signaling in development and disease ; VEGFA-VEGFR2 signaling; p38 MAPK signaling pathway; Extracellular vesicles in the crosstalk of cardiac cells; Ferroptosis; IL-18 signaling pathway; Intracellular trafficking proteins involved in CMT ne…	16	0	6241930443	5079803779	7496834709	8077610403	5265567539	5274003132	7113791514	7157438553	7120147976	3167619585	4872960976	6221585608	5442106575	5647417041	6353392550	5619499185	6307944229	5948987890
High	Master Protein	P43243	Matrin-3 OS=Homo sapiens OX=9606 GN=MATR3 PE=1 SV=2	0	336.392	45	40	2090	40	847	94.6	6.25	357.08	440.33	100.46	685.9	677.87	754.88	29	31	23	35	35	37	9782	MATR3	B7ZAV5; D3DQC3; hsa:9782; P43243; Q9UHW0; Q9UQ27	ENSG00000015479		0	0	6.53264e+08	8.97735e+08	1021549956	8.10179e+08	8.73151e+08	1156929326	1256025186	1041891439	1768582759	8.00392e+08	1069437787	9.96249e+08	1160408945	7.71025e+08	8.87095e+08	6.05441e+08	9.51063e+08	1579500772
High	Master Protein	Q13011	Delta(3,5)-Delta(2,4)-dienoyl-CoA isomerase, mitochondrial OS=Homo sapiens OX=9606 GN=ECH1 PE=1 SV=2	0	335.761	75	25	4955	25	328	35.8	8	1406.17	1671.74	573.13	2171.42	1939.36	2408.04	18	19	17	25	19	23	1891	ECH1	A8K745; hsa:1891; Q13011; Q8WVX0; Q96EZ9	ENSG00000104823; ENSG00000282853	Fatty acid biosynthesis; IL-18 signaling pathway	3	0	2953919940	2219680665	2925032854	4269604038	3913312957	2846648916	5298922280	5244113169	4681756198	1993546954	3728720693	5010925489	3542805135	1730224974	3610317090	1681617861	2084983910	1378965425
High	Master Protein	O75083	WD repeat-containing protein 1 OS=Homo sapiens OX=9606 GN=WDR1 PE=1 SV=4	0	333.368	52	34	3455	34	606	66.2	6.65	766.28	824.48	253.48	1064.48	1231.99	1363.29	32	29	23	31	31	30	9948	WDR1	A8K6E9; A8MPU4; hsa:9948; O75083; O75313; Q8N6E5; Q9UG05; Q9UG78; Q9UQE0	ENSG00000071127	Hypertrophy model	2	0	2204881425	2898834176	2371910415	3017465790	1989535252	2237684133	2096703687	2147166772	2091091044	2022931571	2165355473	3034390804	3162746529	3207496655	2735364240	2354099982	2957373103	1637997201
High	Master Protein	P68104	Elongation factor 1-alpha 1 OS=Homo sapiens OX=9606 GN=EEF1A1 PE=1 SV=1	0	332.293	56	27	6549	27	462	50.1	9.01	1500.86	1656.09	548.74	2623.9	2566.55	2828.26	23	19	15	25	25	25	1915	EEF1A1	hsa:1915; P04719; P04720; P68104; Q6IQ15	ENSG00000156508	Translation factors; Fragile X syndrome; 2q37 copy number variation syndrome	10	0	7784251081	12200013598	21088130666	13580262312	18768354041	16392585963	11758887594	12395161188	18386677043	14379917485	11006267119	12680223697	13227816947	13643609629	24848732444	49271631502	27580985629	11346232603
High	Master Protein	O60716-3	Isoform 1AC of Catenin delta-1 OS=Homo sapiens OX=9606 GN=CTNND1	0	331.816	49	36	2279	36	939	104.9	6.87	491.85	578.2	154.96	912.35	950.06	1216.5	29	29	23	28	33	31		CTNND1	O60716-3			0	0	7.77155e+08	729915697	1020241312	1078164783	8.12895e+08	6.19519e+08	1061619847	1100705102	7.83299e+08	8.61401e+08	9.51909e+08	9.00183e+08	8.73271e+08	8.62628e+08	1168121418	6.78571e+08	8.13843e+08	1030859198
High	Master Protein	P51659	Peroxisomal multifunctional enzyme type 2 OS=Homo sapiens OX=9606 GN=HSD17B4 PE=1 SV=3	0	331.81	52	33	2430	33	736	79.6	8.84	625.07	646.26	156.93	960.43	951.01	1067.12	27	29	26	29	31	31	3295	HSD17B4	B4DNV1; B4DVS5; E9PB82; F5HE57; hsa:3295; P51659	ENSG00000133835	Androgen receptor network in prostate cancer; Steroid biosynthesis; Disorders of bile acid synthesis and biliary transport; Primary ovarian insufficiency	10	0	8.95694e+08	7.89948e+08	1073981675	1190721211	8.38445e+08	8.25959e+08	1044704424	1189447413	1684085554	9.76249e+08	1157432845	1360888268	1203674783	1244227417	1335736257	6.98896e+08	8.25333e+08	5.38239e+08
High	Master Protein	P12277	Creatine kinase B-type OS=Homo sapiens OX=9606 GN=CKB PE=1 SV=1	0	331.318	70	23	1707	22	381	42.6	5.59	415.73	513.5	305.01	532.94	764.38	805.2	18	19	16	19	19	20	1152	CKB	A8K236; B2R5R4; hsa:1152; P12277; Q2LE07; Q6FG40; Q9UC66	ENSG00000166165		2	1	6.65082e+08	5.40948e+08	8.00222e+08	1234591592	4.68035e+08	6.5502e+08	7.29984e+08	8.29151e+08	6.00195e+08	4.16167e+08	5.53662e+08	6.0596e+08	8.4376e+08	6.77872e+08	5.88276e+08	4.06819e+08	619137217	1081430853
High	Master Protein	Q9HCC0	Methylcrotonoyl-CoA carboxylase beta chain, mitochondrial OS=Homo sapiens OX=9606 GN=MCCC2 PE=1 SV=1	0	330.31	51	31	3898	31	563	61.3	7.68	668.13	1034.15	290.69	1340.69	1281.62	1732.96	26	25	19	27	28	31	64087	MCCC2	A6NIY9; hsa:64087; Q96C27; Q9HCC0; Q9Y4L7	ENSG00000131844		3	0	1475330995	1045542970	2047006856	2815828159	1626879391	1174771147	2016558505	1592219107	1514776413	1023068045	1673640314	2334917713	1464400667	1074692072	1787867106	614396082	1130137246	1296899694
High	Master Protein	P23786	Carnitine O-palmitoyltransferase 2, mitochondrial OS=Homo sapiens OX=9606 GN=CPT2 PE=1 SV=2	0	330.229	54	36	2506	36	658	73.7	8.18	448.88	572.67	170.7	604.23	560.88	965.56	31	28	23	26	26	33	1376	CPT2	B2R6S0; hsa:1376; P23786; Q5SW68; Q9BQ26	ENSG00000157184	Fatty acid beta-oxidation; PPAR-alpha pathway; Nuclear receptors meta-pathway; Mitochondrial long chain fatty acid beta-oxidation; PPAR signaling pathway; Thermogenesis; Mitochondrial fatty acid oxidation disorders	9	0	2376666640	2193327789	2524125936	3294237839	8793167790	2673598371	1476096961	2719334720	7.26565e+08	3128991951	3981549847	4157892589	2327197635	1536625779	2954613328	8.94155e+08	1772046298	1797075981
High	Master Protein	Q14112	Nidogen-2 OS=Homo sapiens OX=9606 GN=NID2 PE=1 SV=3	0	330.179	28	39	3215	38	1375	151.2	5.29	728.03	940.81	448.8	1551.5	1283.3	1289.71	30	31	27	33	33	29	22795	NID2	A8K6I7; B4DU19; hsa:22795; O43710; Q14112	ENSG00000087303		1	0	2314769540	2416740681	2009267721	2584823739	8.54266e+08	1558643046	1949196973	1969400623	1262297714	2286969005	2295081260	1514598591	1882454705	2501840145	3567082848	2859918357	2115189646	1766845936
High	Master Protein	P23528	Cofilin-1 OS=Homo sapiens OX=9606 GN=CFL1 PE=1 SV=3	0	329.364	95	29	4072	18	166	18.5	8.09	930.42	909.81	400.7	1841.87	1648.11	1696.2	24	22	18	25	28	26	1072	CFL1	B3KUQ1; hsa:1072; P23528; Q53Y87; Q9UCA2	ENSG00000172757	Brain-derived neurotrophic factor (BDNF) signaling pathway; VEGFA-VEGFR2 signaling; EGF/EGFR signaling pathway; Envelope proteins and their potential roles in EDMD physiopathology; 7q11.23 copy number variation syndrome; Neuroinflammation and glutamatergic signaling; CCL18 signaling pathway; Regulation of actin cytoskeleton; G13 signaling pathway	15	14	3424325770	4857180722	4890663957	2892882253	5101884379	4470752463	3856006056	3567301715	1374434171	2773179186	3712242405	4001022086	4525547259	5821464871	4032709023	4828160489	6756458126	7775184531
High	Master Protein	P20700	Lamin-B1 OS=Homo sapiens OX=9606 GN=LMNB1 PE=1 SV=2	0	328.897	60	42	2764	34	586	66.4	5.16	382.72	489.26	197.35	1015.09	807.05	622.89	36	33	31	41	40	38	4001	LMNB1	B2R6J6; hsa:4001; P20700; Q3SYN7; Q96EI6	ENSG00000113368	Fas ligand pathway and stress induction of heat shock proteins; Familial partial lipodystrophy; Progeria-associated lipodystrophy; Acquired partial lipodystrophy / Barraquer-Simons syndrome	14	0	6.82309e+08	995773930	680583161	7.01488e+08	6.77001e+08	1132405872	1301519351	1585527845	1105531899	747783145	7.87312e+08	553745102	1465541835	1800491519	1385473690	1282255283	1354296882	1355847425
High	Master Protein	P07814	Bifunctional glutamate/proline--tRNA ligase OS=Homo sapiens OX=9606 GN=EPRS1 PE=1 SV=5	0	328.533	33	48	1674	47	1512	170.5	7.33	270.66	280.28	69.53	476.53	418.84	631.39	34	36	17	36	43	41	2058	EPRS1	A0AVA9; B9EGH3; hsa:2058; P07814; Q05BP6; Q05DF8; Q5DSM1; Q5H9S5; Q6PD57; Q86X73	ENSG00000136628	Parkinson's disease pathway; VEGFA-VEGFR2 signaling; Amino acid metabolism	6	1	1191549031	1387093315	1535188947	1297554678	1050975092	8.06995e+08	1076236381	1237076649	1053962553	1499374292	1221147463	1058413871	978620842	1515642821	1499355844	1382067900	1368488297	7.14991e+08
High	Master Protein	P02649	Apolipoprotein E OS=Homo sapiens OX=9606 GN=APOE PE=1 SV=1	0	326.022	82	34	3965	34	317	36.1	5.73	1067.48	1218.47	420.24	1780	1627.24	1185.44	29	27	25	32	30	27	348	APOE	B2RC15; C0JYY5; hsa:348; P02649; Q9P2S4	ENSG00000130203	Vitamin B12 metabolism; Alzheimer's disease and miRNA effects; Apoptosis-related network due to altered Notch3 in ovarian cancer; ApoE and miR-146 in inflammation and atherosclerosis; Statin inhibition of cholesterol production; Familial hyperlipidemia type 3; Alzheimer's disease; Cholesterol metabolism; Fatty Acids and Lipoproteins Transport in Hepatocytes	21	0	3621276938	3625171800	3212959873	3177225459	2276030595	2723494055	3577202494	3146220950	3236918036	2795262632	2368140641	5820971630	4989132082	2598961020	2319446547	3354566445	4007324164	1454767874
High	Master Protein	Q6IB77	Glycine N-acyltransferase OS=Homo sapiens OX=9606 GN=GLYAT PE=1 SV=3	0	324.831	63	17	4542	17	296	33.9	8.16	762.63	1097.46	279.67	1220.01	1161.46	2355.01	15	15	14	15	16	16	10249	GLYAT	H1AE11; hsa:10249; O14833; Q6IB77; Q96QK7	ENSG00000149124	Amino acid conjugation of benzoic acid; Metapathway biotransformation Phase I and II	5	0	3157611260	1525630346	5328991792	5216293359	5637234764	2453387300	4969860332	3240463334	1754883518	2133232994	3471746398	6833913541	3762937766	1200667168	3438790842	7.1452e+08	2237205321	1928975277
High	Master Protein	P54819	Adenylate kinase 2, mitochondrial OS=Homo sapiens OX=9606 GN=AK2 PE=1 SV=2	0	324.71	73	22	4455	22	239	26.5	7.81	1043.05	1240.38	484.41	1666.8	1705.93	2495.22	15	15	15	20	21	21	204	AK2	A8K6L1; B4DHH7; B4DL64; hsa:204; P54819; Q16856; Q5EB54; Q5TIF7; Q8TCY2; Q8TCY3	ENSG00000004455		1	0	2333083664	1247859103	4677655589	3150908054	3936670520	2049569790	3460472631	2386450104	2170221998	1396435503	2112407998	2679439033	2900014919	1221039582	2227456428	6.45185e+08	1562144739	1096913142
High	Master Protein	P12270	Nucleoprotein TPR OS=Homo sapiens OX=9606 GN=TPR PE=1 SV=3	0	324.081	28	60	1235	60	2363	267.1	5.02	246.82	227.42	83.04	534.15	460.14	431.91	36	34	26	48	48	43	7175	TPR	hsa:7175; P12270; Q15624; Q15655; Q5SWY0; Q99968	ENSG00000047410		29	0	7.89571e+08	1046202623	8.51521e+08	1030734361	9.96336e+08	1360621964	1725470450	1428310566	1190771645	7.03353e+08	1065740027	8.58468e+08	1033325915	9.85943e+08	1217502877	1224226469	1077081595	5.16842e+08
High	Master Protein	P63104	14-3-3 protein zeta/delta OS=Homo sapiens OX=9606 GN=YWHAZ PE=1 SV=1	0	323.472	78	28	6641	21	245	27.7	4.79	1197.5	1483.13	587.31	2447.47	2456.83	2548.96	24	25	22	27	27	27	7534	YWHAZ	A8K1N0; B7Z465; hsa:7534; P29213; P29312; P63104; Q32P43; Q5XJ08; Q6GPI2; Q6IN74; Q6NUR9; Q6P3U9; Q86V33	ENSG00000164924	Cell cycle; Prolactin signaling pathway; Pathogenic Escherichia coli infection; Myometrial relaxation and contraction pathways; Hepatitis B infection; GDNF signaling; Calcium regulation in cardiac cells; Sudden infant death syndrome (SIDS) susceptibility pathways	23	11	7861277211	9667867554	7191080226	8464272454	8887374629	8866927461	8258599037	9313508452	11061185875	7683857898	8169282278	7737989948	10645986219	11028089438	9570676380	10435687799	9661936380	5305401694
High	Master Protein	P27338	Amine oxidase [flavin-containing] B OS=Homo sapiens OX=9606 GN=MAOB PE=1 SV=3	0	321.08	56	28	3865	25	520	58.7	7.5	903.49	1185.99	230.58	1405.78	1086.11	1928.18	24	21	21	23	24	27	4129	MAOB	B2R6R3; B7Z5H3; D3DWC3; hsa:4129; P27338; Q7Z6S2	ENSG00000069535	Dopamine metabolism; Overlap between signal transduction pathways contributing to LMNA laminopathies	3	3	1621342907	1727370536	2275947504	3170724631	3038658968	2033695780	2207134276	2633029419	2220188462	3017138598	1888069615	2623341447	2047206177	1832142835	2651258629	1163590322	1629265907	1179394897
High	Master Protein	Q08257	Quinone oxidoreductase OS=Homo sapiens OX=9606 GN=CRYZ PE=1 SV=1	0	319.653	74	30	4203	30	329	35.2	8.44	986.33	1258.54	418.17	2006.06	1632.27	2265.5	25	25	18	27	27	28	1429	CRYZ	A6NN60; D3DQ76; hsa:1429; Q08257; Q53FT0; Q59EU7; Q5HYE7; Q6NSK9	ENSG00000116791		0	0	4458001657	3536004977	5454250898	6560229095	2700786740	1933215763	5554828703	4087974742	3272887157	2464265918	4715492101	4902208407	4376746667	3180403900	4796328046	2580023528	3694800680	4634713225
High	Master Protein	P10636	Microtubule-associated protein tau OS=Homo sapiens OX=9606 GN=MAPT PE=1 SV=5	0	319.528	51	42	2149	10	758	78.9	6.71	223.18	360.84	104.53	497.62	462.96	879.66	27	26	21	33	30	39	4137	MAPT	hsa:4137; P10636; P18518; Q14799; Q15549; Q15550; Q15551; Q1RMF6; Q53YB1; Q5CZI7; Q5XWF0; Q6QT54; Q9UDJ3; Q9UMH0; Q9UQ96	ENSG00000186868; ENSG00000276155; ENSG00000277956	IL-5 signaling pathway; Microtubule cytoskeleton regulation; Alzheimer's disease and miRNA effects; Brain-derived neurotrophic factor (BDNF) signaling pathway; Kit receptor signaling pathway; Copper homeostasis; MAPK signaling pathway; IL-2 signaling pathway; Inclusion body myositis; Alzheimer's disease; DYRK1A involvement regarding cell proliferation in brain development; Neurogenesis regulation…	14	37	5.63927e+08	3.6697e+08	1083342157	9.46709e+08	1801866568	1322962616	1195645328	1046648152	1473019318	1133339980	1035579832	9.77671e+08	7.70063e+08	3.98542e+08	555831468	4.94224e+08	4.77673e+08	4.81815e+08
High	Master Protein	Q641Q2	WASH complex subunit 2A OS=Homo sapiens OX=9606 GN=WASHC2A PE=1 SV=3	0	319.361	37	38	954	8	1341	147.1	4.81	163.36	172.36	66.42	369.37	445.61	399.07	17	20	16	27	32	32	387680	WASHC2A	A2A3S2; A2A3U6; hsa:387680; Q5SNT6; Q641Q2; Q6DHY0	ENSG00000099290	10q11.21q11.23 copy number variation syndrome	1	31	4.28483e+08	3.84653e+08	8.24548e+08	8.41752e+08	2.92804e+08	2.8992e+08	502862362	2.55128e+08	3.67672e+08	312984210	6.16817e+08	8.43366e+08	6.39819e+08	4.43542e+08	6.48289e+08	4.35741e+08	4.35297e+08	2514746376
High	Master Protein	P10412	Histone H1.4 OS=Homo sapiens OX=9606 GN=H1-4 PE=1 SV=2	0	315.289	45	22	9716	4	219	21.9	11.03	2768.83	3042.82	1082.35	5305	3934.08	3825.76	21	20	20	22	22	22	3008	H1-4	hsa:3008; P10412; Q4VB25	ENSG00000168298	Pathways affected in adenoid cystic carcinoma	3	18	7373679566	21412619081	11060667965	16400899707	26131991978	22597957700	24922301260	21633335729	24620014667	16020880164	14156767605	21340594776	25888437365	23581962204	18888063426	20749445465	24557897747	12691558643
High	Master Protein	P09622	Dihydrolipoyl dehydrogenase, mitochondrial OS=Homo sapiens OX=9606 GN=DLD PE=1 SV=2	0	314.272	45	24	4225	24	509	54.1	7.85	963.15	1092.89	344.55	1629.46	1360.29	1788.48	21	18	18	23	23	24	1738	DLD	B2R5X0; B4DHG0; B4DT69; hsa:1738; P09622; Q14131; Q14167; Q59EV8; Q8WTS4	ENSG00000091140	Fatty acid beta-oxidation; TCA cycle and deficiency of pyruvate dehydrogenase complex (PDHc); Amino acid metabolism; Tryptophan metabolism; 7q11.23 copy number variation syndrome; Neuroinflammation and glutamatergic signaling; Glycolysis and gluconeogenesis; 10q11.21q11.23 copy number variation syndrome; TCA cycle (aka Krebs or citric acid cycle)	17	0	2285663137	2485047271	4122300347	3433777209	4458980273	3255436324	4052921348	4132147085	5180757413	3016667822	3405277236	3545838627	3287634077	2068396643	2840708833	1474946655	2133378728	1661308291
High	Master Protein	Q15746	Myosin light chain kinase, smooth muscle OS=Homo sapiens OX=9606 GN=MYLK PE=1 SV=4	0	309.98	24	42	2349	34	1914	210.6	6.15	484.68	804.03	234.76	936.7	725.57	708.33	35	39	28	37	34	40	4638	MYLK	B4DUE3; D3DN97; hsa:4638; O95796; O95797; O95798; O95799; Q14844; Q15746; Q16794; Q17S15; Q3ZCP9; Q5MY99; Q5MYA0; Q6P2N0; Q7Z4J0; Q9C0L5; Q9UBG5; Q9UBY6; Q9UIT9	ENSG00000065534	MicroRNAs in cardiomyocyte hypertrophy; Endothelin pathways; Focal adhesion; Physico-chemical features and toxicity-associated pathways; MFAP5 effect on permeability and motility of endothelial cells via cytoskeleton rearrangement; Airway smooth muscle cell contraction; Regulation of actin cytoskeleton	9	8	1244559998	1610417157	7.42905e+08	1087023049	7.08226e+08	1106347111	8.76719e+08	1446072549	7.54241e+08	8.22787e+08	8.26603e+08	1188534837	1248864588	1329231165	1316051273	2092167574	2192879184	1101351845
High	Master Protein	Q96RQ3	Methylcrotonoyl-CoA carboxylase subunit alpha, mitochondrial OS=Homo sapiens OX=9606 GN=MCCC1 PE=1 SV=3	0	309.314	44	30	2108	30	725	80.4	7.78	479.36	662.21	143.35	761.04	627.1	1111.82	28	29	19	26	27	29	56922	MCCC1	hsa:56922; Q59ES4; Q96RQ3; Q9H959; Q9NS97	ENSG00000078070	Amino acid metabolism	4	0	8.56708e+08	6.59187e+08	9.7237e+08	1596615306	1774943421	1216802701	1137625296	1056651696	1255206991	8.31602e+08	1176948621	1965405156	1256951482	6.88581e+08	1249320585	3.83872e+08	8.28433e+08	6.01416e+08
High	Master Protein	P04083	Annexin A1 OS=Homo sapiens OX=9606 GN=ANXA1 PE=1 SV=2	0	308.728	64	29	2900	29	346	38.7	7.02	623.75	857.37	284.64	1402.13	1322.25	1216.01	23	19	19	27	26	22	301	ANXA1	B5BU38; hsa:301; P04083	ENSG00000135046	Spinal cord injury; VEGFA-VEGFR2 signaling; Prostaglandin synthesis and regulation	8	0	2314139748	3148224615	1486404786	2137195546	1152542268	1706346812	1859676888	1713637310	9.33595e+08	9.81017e+08	2090856605	1740993427	2725915309	3308159633	2325596626	3305490747	2963609824	2136024328
High	Master Protein	P02452	Collagen alpha-1(I) chain OS=Homo sapiens OX=9606 GN=COL1A1 PE=1 SV=6	0	308.618	25	32	7545	32	1464	138.8	5.8	2497.81	2736.51	1319.79	4465.77	3277.38	2838.1	29	17	16	22	17	18	1277	COL1A1	hsa:1277; O76045; P02452; P78441; Q13896; Q13902; Q13903; Q14037; Q14992; Q15176; Q15201; Q16050; Q59F64; Q7KZ30; Q7KZ34; Q8IVI5; Q8N473; Q9UML6; Q9UMM7	ENSG00000108821	Focal adhesion; Osteoblast signaling; Focal adhesion: PI3K-Akt-mTOR-signaling pathway; miR-509-3p alteration of YAP1/ECM axis; PI3K-Akt signaling pathway; Inflammatory response pathway; Netrin-UNC5B signaling pathway; IL-18 signaling pathway; Type I collagen synthesis in the context of osteogenesis imperfecta; Angiotensin II receptor type 1 pathway; Burn wound healing; CCL18 signaling pathway; NR…	34	0	19654906770	25979511671	20422033509	8061025818	5880330310	18308419769	12418160822	26144203536	11706536919	8902878173	23355872720	9350643209	20844496481	19689986767	18789335057	35176158821	25511491389	8459301000
High	Master Protein	P08572	Collagen alpha-2(IV) chain OS=Homo sapiens OX=9606 GN=COL4A2 PE=1 SV=4	0	307.219	13	17	6446	17	1712	167.4	8.66	1371.98	1649.34	756.82	3095.59	2393.88	2459.38	15	13	15	15	15	15	1284	COL4A2	hsa:1284; P08572; Q14052; Q548C3; Q5VZA9; Q66K23	ENSG00000134871	miRNA targets in ECM and membrane receptors; Focal adhesion; Hepatitis C and hepatocellular carcinoma; Focal adhesion: PI3K-Akt-mTOR-signaling pathway; PI3K-Akt signaling pathway; Epithelial to mesenchymal transition in colorectal cancer; Small cell lung cancer; Malignant pleural mesothelioma	22	0	14794748301	18537261704	9233845721	11513287448	11122997493	16333412692	13298751223	20182774155	18754166091	21327134897	13848620433	15837632328	11679399018	14008837932	16822309385	28462942765	23065600157	15376433747
High	Master Protein	P39060	Collagen alpha-1(XVIII) chain OS=Homo sapiens OX=9606 GN=COL18A1 PE=1 SV=5	0	306.771	18	29	5314	29	1754	178.1	6.01	1224.43	1381.42	489.95	1912.92	1900.64	2022.92	28	27	22	27	28	28	80781	COL18A1	A8MVI4; hsa:80781; P39060; Q58EX6; Q6RZ39; Q6RZ40; Q6RZ41; Q8N4S4; Q8WXI5; Q96T70; Q9UK38; Q9Y6Q7; Q9Y6Q8	ENSG00000182871		7	0	5157230889	5682272192	3534860950	5204691442	4141717885	2411463383	5411286231	5128604329	7096843567	5146252013	4960690791	4728125122	4315008952	4602284447	5020952987	5575696365	5588475231	3206588442
High	Master Protein	Q9UL12	Sarcosine dehydrogenase, mitochondrial OS=Homo sapiens OX=9606 GN=SARDH PE=1 SV=1	0	306.706	36	32	2207	31	918	101	7.25	400.51	715.71	133.4	735.92	462.9	1142.93	29	28	24	30	29	30	1757	SARDH	B2RMR5; B4DPI2; B7ZLT6; hsa:1757; Q5SYV0; Q9UL12; Q9Y280; Q9Y2Y3	ENSG00000123453	Trans-sulfuration, one-carbon metabolism and related pathways	2	1	1037802630	3.52633e+08	1589229581	1804471126	1777118721	1046573938	1524147526	8.75812e+08	1830341644	1251595618	1408056563	1785687514	6.70509e+08	3.46823e+08	1076757034	8322479804	6.03392e+08	1121657741
High	Master Protein	P09110	3-ketoacyl-CoA thiolase, peroxisomal OS=Homo sapiens OX=9606 GN=ACAA1 PE=1 SV=2	0	305.759	54	21	3144	21	424	44.3	8.44	744.71	1036.73	279.71	1603.87	1361.46	1891.68	18	15	14	19	15	17	30	ACAA1	G5E935; hsa:30; P09110; Q96CA6	ENSG00000060971	PPAR-alpha pathway; Nuclear receptors meta-pathway; Amino acid metabolism; PPAR signaling pathway; Eicosanoid metabolism via cyclooxygenases (COX); Eicosanoid metabolism via lipooxygenases (LOX)	11	0	1172544772	7.08698e+08	1839339674	1937925482	1076393803	9.75891e+08	1381639176	1609944734	1176049453	9.63512e+08	1290746577	2546936114	1268843816	6.11144e+08	1015165652	3.43749e+08	7.54704e+08	4214275447
High	Master Protein	P21912	Succinate dehydrogenase [ubiquinone] iron-sulfur subunit, mitochondrial OS=Homo sapiens OX=9606 GN=SDHB PE=1 SV=3	0	305.707	59	26	3662	26	280	31.6	8.76	735.45	805.75	305.45	1064.25	1107.27	1480.47	23	24	22	25	24	25	6390	SDHB	B2R545; hsa:6390; P21912; Q0QEY7; Q9NQ12	ENSG00000117118	Electron transport chain: OXPHOS system in mitochondria; Metabolic reprogramming in colon cancer; Nonalcoholic fatty liver disease; Mitochondrial complex II assembly; TCA cycle (aka Krebs or citric acid cycle)	7	0	1870522247	1035660577	3533954795	3557687509	8.02239e+08	1172059273	2474258733	1840670975	2570192248	9.88058e+08	1962854587	1706645699	1747798851	9.29703e+08	2055529349	8.20198e+08	1150415853	1165968176
High	Master Protein	P36543	V-type proton ATPase subunit E 1 OS=Homo sapiens OX=9606 GN=ATP6V1E1 PE=1 SV=1	0	305.307	54	21	3886	21	226	26.1	8	914.71	999.71	307.43	1351.4	1188.21	2014.42	18	18	15	19	19	21	529	ATP6V1E1	A8MUE4; A8MUN4; hsa:529; P36543	ENSG00000131100	VEGFA-VEGFR2 signaling; Proximal tubule transport	7	0	1582469075	1239205429	2821024456	2507403426	2302262051	1354141167	2740688985	1662724773	3037030370	1115650120	1876606009	3000460287	2073339309	1175615064	1551129262	8.74649e+08	1093893786	2294374333
High	Master Protein	P17858	ATP-dependent 6-phosphofructokinase, liver type OS=Homo sapiens OX=9606 GN=PFKL PE=1 SV=6	0	305.173	43	33	1639	29	780	85	7.5	294.07	403	68.98	548.58	474.05	665.58	25	26	17	26	29	29	5211	PFKL	hsa:5211; P17858; Q96A64; Q96IH4; Q9BR91	ENSG00000141959	Photodynamic therapy-induced HIF-1 survival signaling; Clear cell renal cell carcinoma pathways; Metabolic reprogramming in colon cancer; Insulin signaling; Disorders of fructose metabolism; Glycolysis and gluconeogenesis	8	6	6.44504e+08	6.14905e+08	1393778978	1256016376	8.14448e+08	1061939641	6.26314e+08	794184440	1173470838	937934807	6.91494e+08	1103375118	7.10853e+08	8.84529e+08	1230910668	9.2378e+08	7.80283e+08	8.498e+08
High	Master Protein	P50990	T-complex protein 1 subunit theta OS=Homo sapiens OX=9606 GN=CCT8 PE=1 SV=4	0	304.816	59	37	3390	2	548	59.6	5.6	772.37	881.81	245.02	1507.07	1184.53	1445.92	34	27	24	32	34	35	10694	CCT8	A6NN54; B4DEM7; B4DQH4; hsa:10694; P50990; Q4VBP8	ENSG00000156261	16p11.2 proximal deletion syndrome	8	43	2321446681	2675915057	1475517272	3868006244	3093574102	2522052676	2098445054	2934537689	1765702673	2774473617	3132583084	3059047943	2390157013	3225833390	3387797250	2354352842	2405400178	4861421964
High	Master Protein	Q13576	Ras GTPase-activating-like protein IQGAP2 OS=Homo sapiens OX=9606 GN=IQGAP2 PE=1 SV=4	0	303.32	31	49	1429	46	1575	180.5	5.64	200.63	294.88	39.49	415.99	315.53	644.85	35	39	18	39	36	46	10788	IQGAP2	A8K4V1; B7Z8A4; hsa:10788; J3KR91; Q13576	ENSG00000145703	Ciliary landscape; G13 signaling pathway	7	0	6.57276e+08	647159187	790228167	1112904261	1077066305	1035589224	2053661134	8.16588e+08	6.90273e+08	7.26681e+08	1028565118	1102637130	6.87392e+08	8.48171e+08	7.80812e+08	6.97333e+08	6.37673e+08	979576593
High	Master Protein	P23284	Peptidyl-prolyl cis-trans isomerase B OS=Homo sapiens OX=9606 GN=PPIB PE=1 SV=2	0	300.897	72	26	4953	25	216	23.7	9.41	753.18	824.39	393.21	1360.3	1388.72	1725.6	22	23	20	23	24	25	5479	PPIB	A8K534; hsa:5479; P23284; Q6IBH5; Q9BVK5	ENSG00000166794	Prolactin signaling pathway; Type I collagen synthesis in the context of osteogenesis imperfecta	4	1	3660815143	2555730685	3257789633	3429550714	2751475391	3533687093	2660068306	2694547363	3569348634	8.60634e+08	2006113569	2746620775	3311363824	3498204088	4116456589	3088173475	3674905068	4064780750
High	Master Protein	O43491	Band 4.1-like protein 2 OS=Homo sapiens OX=9606 GN=EPB41L2 PE=1 SV=1	0	300.878	48	43	1533	7	1005	112.5	5.44	181.88	356.3	106.49	465.42	358.64	451.36	27	32	23	37	32	33	2037	EPB41L2	B4DHI8; E9PPD9; hsa:2037; O43491; Q5T4F0; Q68DV2	ENSG00000079819	Splicing factor NOVA regulated synaptic proteins	2	36	1185103627	1258557178	1314884974	1314816674	1434855151	1041332467	9.82113e+08	1732899922	815005285	7.56477e+08	1180615120	1404301994	1504640679	1111912701	1236387799	9.58976e+08	1300505586	5.03292e+08
High	Master Protein	P07910-2	Isoform C1 of Heterogeneous nuclear ribonucleoproteins C1/C2 OS=Homo sapiens OX=9606 GN=HNRNPC	0	300.679	60	29	6177	15	293	32.3	5.08	1013.45	1155.01	453.03	1999.6	1971.05	1634.85	24	23	21	28	29	26		HNRNPC	P07910-2			0	14	2205466545	3428711868	2805497002	3888373918	4255902525	5780933396	5736978107	4571891296	5192270973	2303040104	3333762740	3453190430	5043072759	3531357696	3498840234	3164025616	3289204201	3646852234
High	Master Protein	P00915	Carbonic anhydrase 1 OS=Homo sapiens OX=9606 GN=CA1 PE=1 SV=2	0	299.494	77	18	3778	18	261	28.9	7.12	1250.1	1524.61	366.43	1112.89	1445.46	1014.32	17	16	14	14	18	14	759	CA1	hsa:759; P00915	ENSG00000133742		4	0	10564394412	1424773259	5179630816	5.98859e+08	5.2561e+08	2837442972	1134319577	9.5224e+08	1537548742	624360865	1608081582	859188755	1526974984	2900187703	7.48853e+08	2107720092	2702208471	2003339105
High	Master Protein	P02788	Lactotransferrin OS=Homo sapiens OX=9606 GN=LTF PE=1 SV=6	0	298.991	43	35	1387	35	710	78.1	8.12	88.76	341.85	199.86	727.25	688.74	465.19	18	22	23	35	30	25	4057	LTF	A8K9U8; B2MV13; B7Z4X2; E7EQH5; hsa:4057; O00756; P02788; Q16780; Q16785; Q16786; Q16789; Q5DSM0; Q8IU92; Q8IZH6; Q8TCD2; Q96KZ4; Q96KZ5; Q9H1Z3; Q9UCY5	ENSG00000012223	Male infertility	6	0	1369121616	5.68174e+08	1015477614	1126057646	1.32022e+08	4.22225e+08	3.05003e+08	2.66035e+08	3.68297e+08	1.85051e+08	3.45378e+08	3.30538e+08	6.69802e+08	1800232595	9.29538e+08	1467508586	6458568955	4.10442e+08
High	Master Protein	P30041	Peroxiredoxin-6 OS=Homo sapiens OX=9606 GN=PRDX6 PE=1 SV=3	0	298.935	82	27	3493	27	224	25	6.38	591.11	705.53	275.74	901.04	1047.29	1560.59	19	18	17	25	25	25	9588	PRDX6	A8JZY7; hsa:9588; P30041; P32077; Q5TAH4; Q5ZEZ8	ENSG00000117592	Nuclear receptors meta-pathway; NRF2 pathway; VEGFA-VEGFR2 signaling	5	0	2348918975	1524680627	2530347673	2793089534	1008825756	9.29494e+08	1169932816	1064675339	1257571572	1454161284	1817344114	1771340302	1584334884	1524763784	2060952883	1856263687	1453191953	1880192428
High	Master Protein	P49189	4-trimethylaminobutyraldehyde dehydrogenase OS=Homo sapiens OX=9606 GN=ALDH9A1 PE=1 SV=3	0	298.256	43	27	4460	27	494	53.8	5.87	1063.62	1332.13	332.79	1766.66	1524.72	1810.93	22	23	17	25	23	26	223	ALDH9A1	B2R6X1; B4DXY7; B9EKV4; hsa:223; P49189; Q5VV90; Q6LCL1; Q9NZT7	ENSG00000143149	GABA receptor signaling; Fluoroacetic acid toxicity; Opioid receptor pathways	4	0	3454114505	2629930734	2861072062	3758344208	7103059593	3558610898	3406086459	3887298438	2522028669	3161329020	3782262077	5739290971	3953827435	2641613287	3610297054	1556541696	2573336845	1940370792
High	Master Protein	P00918	Carbonic anhydrase 2 OS=Homo sapiens OX=9606 GN=CA2 PE=1 SV=2	0	298.171	85	30	5583	30	260	29.2	7.4	1153.72	1213.55	335.1	1654.46	1842.77	2448.89	22	19	15	23	27	27	760	CA2	B2R7G8; hsa:760; P00918; Q6FI12; Q96ET9	ENSG00000104267	Proximal tubule transport	4	0	6202319408	5046816054	10527602695	10124690740	8046029857	7113505215	7291774610	5938853189	8357698677	5147133386	6639033859	8387075139	5450296292	4842082332	5141159368	3349972607	4168719328	4584605204
High	Master Protein	P31939	Bifunctional purine biosynthesis protein ATIC OS=Homo sapiens OX=9606 GN=ATIC PE=1 SV=3	0	296.977	60	34	2264	34	592	64.6	6.71	352.17	466.93	146.36	653.98	672.05	886.9	26	24	21	29	32	29	471	ATIC	A8K202; E9PBU3; hsa:471; P31939; Q13856; Q53S28	ENSG00000138363	One-carbon metabolism	3	0	8.62659e+08	8.40934e+08	7.52728e+08	1027595669	3.13199e+08	4.43923e+08	4.88147e+08	4.99362e+08	8.61564e+08	4.97675e+08	7.74118e+08	8.23738e+08	8.12702e+08	9.71394e+08	1052442077	7.23965e+08	7.75056e+08	9.56541e+08
High	Master Protein	P04114	Apolipoprotein B-100 OS=Homo sapiens OX=9606 GN=APOB PE=1 SV=2	0	296.613	15	57	703	57	4563	515.3	7.05	191.19	183.44	5.76	198.8	370.29	14.71	35	38	7	43	52	8	338	APOB	hsa:338; O00502; P04114; P78479; P78480; P78481; Q13779; Q13785; Q13786; Q13787; Q13788; Q4ZG63; Q53QC8; Q7Z600; Q9UMN0	ENSG00000084674	Selenium micronutrient network; Vitamin B12 metabolism; Folate metabolism; Statin inhibition of cholesterol production; Male infertility; Perturbations to host-cell autophagy, induced by SARS-CoV-2 proteins; Familial hyperlipidemia type 2; Cholesterol metabolism; Female steroid hormones in cardiomyocyte energy metabolism; Fatty Acids and Lipoproteins Transport in Hepatocytes; Cholesterol metaboli…	31	0	2.70792e+08	4.93798e+08	2.41243e+08	2.58383e+08	2.88268e+08	5.86362e+08	2.40198e+08	2.5926e+08	9.56059e+07	1.77828e+08	3.33435e+08	2.35754e+08	2.26548e+08	8.82203e+08	3.04159e+08	1.96238e+08	5.3248e+08	8.2031e+08
High	Master Protein	P12694	2-oxoisovalerate dehydrogenase subunit alpha, mitochondrial OS=Homo sapiens OX=9606 GN=BCKDHA PE=1 SV=2	0	295.152	55	21	2428	21	445	50.4	8.27	558.15	802.41	245.38	837.11	857.39	1139.7	16	18	16	18	19	20	593	BCKDHA	B4DP47; E7EW46; hsa:593; P12694; Q16034; Q16472	ENSG00000248098	Lipid metabolism pathway	3	0	1318300586	1112914714	1872543782	1676280794	2171916285	2195067771	1533367509	1707259851	2145883920	9.9258e+08	1788570976	1569137941	1528501865	1078325175	1488599465	7.09006e+08	1097078808	1719555385
High	Master Protein	Q07075	Glutamyl aminopeptidase OS=Homo sapiens OX=9606 GN=ENPEP PE=1 SV=3	0	295.017	33	37	2066	37	957	109.2	5.47	309.11	321.49	109.13	573.13	403.03	837.71	31	31	26	31	31	35	2028	ENPEP	hsa:2028; Q07075; Q504U2	ENSG00000138792		1	0	1417510936	2777892627	1588417027	1750770936	1990861687	1955735454	1221982310	1619022298	2390296014	2080555280	2136494333	2234968456	2230353477	2153860059	2477273605	1868863151	1978717740	3361898615
High	Master Protein	Q7KZF4	Staphylococcal nuclease domain-containing protein 1 OS=Homo sapiens OX=9606 GN=SND1 PE=1 SV=1	0	294.743	48	41	2194	41	910	101.9	7.17	443.43	462.25	127.55	949.34	766.55	872.44	32	27	23	37	39	34	27044	SND1	hsa:27044; Q13122; Q7KZF4; Q96AG0	ENSG00000197157	VEGFA-VEGFR2 signaling	2	0	8.69322e+08	1313042524	8.03692e+08	1082848495	1263674620	1399044588	1084627369	1198237147	1485106973	1253359813	1077747089	1333799676	1540359372	1681366911	1525833598	1690380357	1173910539	1680904707
High	Master Protein	P49448	Glutamate dehydrogenase 2, mitochondrial OS=Homo sapiens OX=9606 GN=GLUD2 PE=1 SV=2	0	294.672	40	28	8056	2	558	61.4	8.46	1662.16	1914.41	539.65	2463.22	2044.76	3083.72	24	24	23	28	25	26	2747	GLUD2	B2R8G0; hsa:2747; P49448; Q9UDQ4	ENSG00000182890; ENSG00000288118		2	0	3.76229e+07	1.93713e+07	4.45941e+07	34292895	5.35987e+07		1.01363e+07	3.94895e+07	5.50798e+07	3.52714e+07	3.60254e+07	2.54527e+07	1.79323e+07	2.62644e+07	4.60249e+07	2.16138e+07	2.60781e+07	2.37935e+07
High	Master Protein	Q14624	Inter-alpha-trypsin inhibitor heavy chain H4 OS=Homo sapiens OX=9606 GN=ITIH4 PE=1 SV=4	0	294.121	37	34	1476	34	930	103.3	6.98	312.19	328.08	155.5	457.72	758.33	235.34	23	25	22	26	30	19	3700	ITIH4	B7Z545; E9PGN5; hsa:3700; Q14624; Q15135; Q9P190; Q9UQ54	ENSG00000055955	Network map of SARS-CoV-2 signaling pathway	2	0	6.79374e+08	834801443	6.95378e+08	5.18834e+08	3.00853e+08	6.89698e+08	9.20592e+08	4.59281e+08	5.40534e+08	3.97952e+08	5.18331e+08	289806474	5.76621e+08	1085466671	5.86636e+08	8.72271e+08	1136376856	1390861112
High	Master Protein	Q16181	Septin-7 OS=Homo sapiens OX=9606 GN=SEPTIN7 PE=1 SV=2	0	293.424	54	30	2740	29	437	50.6	8.63	502.37	554.14	180.3	873.23	861.87	859.18	22	23	16	25	28	26	989	SEPTIN7	hsa:989; Q16181; Q52M76; Q6NX50	ENSG00000122545		1	1	1135766499	1402534112	1483379582	1832164794	4.48628e+08	1076786409	1348389257	1222774861	1640987824	6.93669e+08	1188810432	1488546260	1348749678	1302227634	1692037635	1641959740	1614570868	1940269449
High	Master Protein	Q06278	Aldehyde oxidase OS=Homo sapiens OX=9606 GN=AOX1 PE=1 SV=2	0	293.336	29	40	1006	40	1338	147.8	7.17	75.13	159.17	61.16	234.83	296.49	285.91	23	29	21	32	31	36	316	AOX1	hsa:316; O14765; Q06278; Q53RR8; Q53TV3; Q9BYF0; Q9UPG6	ENSG00000138356	Nicotine metabolism in liver cells; Effects of nitric oxide; Tryptophan metabolism	4	0	2.01402e+08	3.91504e+08	3.67256e+08	5.35215e+08	1.22882e+08	2.32867e+08	3.08216e+08	3.98505e+08	3.62788e+08	2.34592e+08	4.44675e+08	4.06193e+08	351850350	4.38995e+08	7.24931e+08	3.76669e+08	3.15617e+08	3.92199e+08
High	Master Protein	Q8N3V7-2	Isoform 2 of Synaptopodin OS=Homo sapiens OX=9606 GN=SYNPO	0	292.306	49	33	2026	33	903	96.3	9.77	555.84	403.96	59.6	781.89	714.78	1131.33	29	23	12	28	30	29		SYNPO	Q8N3V7-2			0	0	595046660	6.4519e+08	9.23525e+08	1696210899	1231071148	1334678387	7.8062e+08	7.64054e+08	1386526191	2.70841e+08	1286216754	1582206631	1761437127	7.26766e+08	6.34439e+08	5.01579e+08	9.04846e+08	9.61354e+08
High	Master Protein	P23526	Adenosylhomocysteinase OS=Homo sapiens OX=9606 GN=AHCY PE=1 SV=4	0	291.668	49	31	4552	29	432	47.7	6.34	940.32	1334.73	310.26	1557.74	1623.58	1959.35	26	25	20	26	26	29	191	AHCY	A8K307; B3KUN3; E1P5P2; F5H737; hsa:191; P23526; Q96A36	ENSG00000101444	Folate metabolism; Trans-sulfuration pathway; One-carbon metabolism; Trans-sulfuration, one-carbon metabolism and related pathways; Methionine de novo and salvage pathway; Ethanol effects on histone modifications	10	2	3386432863	3142373743	3008799985	4654203766	4492240160	3337454784	3332249168	4321155440	3634437031	3708256165	3523625738	4876886349	3791942971	3052594000	4153118664	2146623970	3132007846	1147262939
High	Master Protein	P20711	Aromatic-L-amino-acid decarboxylase OS=Homo sapiens OX=9606 GN=DDC PE=1 SV=2	0	290.273	52	30	4073	30	480	53.9	7.2	895.46	1183.02	248.26	1348.43	1278.48	1880.14	24	24	19	24	27	29	1644	DDC	C9IYA0; E7ER62; E7EU95; hsa:1644; P20711; Q16723; Q5W5T9; Q75MJ6	ENSG00000132437	Nicotine effect on dopaminergic neurons; Parkinson's disease pathway; Dopamine metabolism; Dopaminergic neurogenesis; Amino acid metabolism; Tryptophan metabolism; Biogenic amine synthesis; Sudden infant death syndrome (SIDS) susceptibility pathways	10	0	2660288497	3661369568	4475103105	5036968492	7111588555	3527139385	4201504560	4235160696	5038935458	3452127325	3002051319	5723500440	2738826098	2618309488	3709897652	1655615984	2836932235	1179732927
High	Master Protein	P61604	10 kDa heat shock protein, mitochondrial OS=Homo sapiens OX=9606 GN=HSPE1 PE=1 SV=2	0	290.151	100	26	8441	26	102	10.9	8.92	1874.8	1949.79	722.76	2772.54	2845.43	3300.88	22	20	21	24	24	25	3336	HSPE1	hsa:3336; O95421; P61604; Q04984; Q53X54; Q9UDH0	ENSG00000115541		1	0	8939931333	10007399889	13475688871	11959975944	19872236416	14074835777	14955297055	16069600731	11910961642	7778921071	14600116047	13467251069	13074488310	7337846938	11436578903	6345773128	8057127658	2632839949
High	Master Protein	P13804	Electron transfer flavoprotein subunit alpha, mitochondrial OS=Homo sapiens OX=9606 GN=ETFA PE=1 SV=1	0	289.281	59	17	4877	17	333	35.1	8.38	1044.14	1466.84	550.24	2213.74	1879.84	2362.65	16	13	13	17	17	17	2108	ETFA	B4DT43; hsa:2108; P13804; Q53XN3	ENSG00000140374		1	0	3652387155	2254838315	4472781934	5189338364	4669044892	2859279936	4262259671	3647505866	1952588423	2970840206	4502230705	4240833329	2823167820	1919364673	3218315892	1476577098	2100619860	6391144148
High	Master Protein	O95954	Formimidoyltransferase-cyclodeaminase OS=Homo sapiens OX=9606 GN=FTCD PE=1 SV=2	0	289.042	57	33	2289	33	541	58.9	5.74	504.94	533.77	109.7	663.84	602.84	1291.68	30	27	21	31	28	32	10841	FTCD	B9EGD0; hsa:10841; O95954; Q86V03; Q9HCT4; Q9HCT5; Q9HCT6; Q9UHJ2	ENSG00000160282	One-carbon metabolism; Amino acid metabolism; Amino acid metabolism pathway excerpt: histidine catabolism extension	4	0	8.95227e+08	1222488615	1481470811	1690259145	2565366561	1333562026	1358911650	1547125956	2088766926	2301565189	1064975783	2435751365	1251530987	4.96724e+08	1042701853	6.27309e+08	6.26699e+08	8.16996e+08
High	Master Protein	Q96CM8	Medium-chain acyl-CoA ligase ACSF2, mitochondrial OS=Homo sapiens OX=9606 GN=ACSF2 PE=1 SV=2	0	288.969	43	29	3551	29	615	68.1	7.55	869.72	1295.23	292.49	1469.61	1199.81	1932.58	26	25	19	24	25	29	80221	ACSF2	B4DFQ6; B4DHT5; B4DUF5; hsa:80221; Q96CM8; Q9H7G2	ENSG00000167107	Mitochondrial long chain fatty acid beta-oxidation; Mitochondrial fatty acid oxidation disorders	3	0	5237647599	4735656503	4361270379	5946947127	4765318574	3915350303	4019167290	5417282018	3446442018	3453501409	4004962336	4649267061	2877919635	2684026264	4151038826	1738279380	2713949022	1755410265
High	Master Protein	Q9UPN3	Microtubule-actin cross-linking factor 1, isoforms 1/2/3/4/5 OS=Homo sapiens OX=9606 GN=MACF1 PE=1 SV=4	0	288.682	10	61	567	5	7388	837.8	5.39	74.99	62.98	10.14	188.67	160.44	198.22	17	21	5	40	38	49	23499	MACF1	B1ALC5; E9PJT0; hsa:23499; O75053; Q5VW20; Q8WXY1; Q8WXY2; Q96PK2; Q9H540; Q9UKP0; Q9ULG9; Q9UPN3	ENSG00000127603	Mesodermal commitment pathway; Mesodermal commitment pathway	2	53	3.80007e+08	6.6779e+08	3.05313e+08	2.89406e+08	4.34571e+08	3.70877e+08	2.50744e+08	3.17933e+08	2.48716e+08	4.13463e+08	4.8287e+08	4.52135e+08	6.24168e+08	7.2178e+08	6.52349e+08	5.54902e+08	4.82061e+08	3.52405e+08
High	Master Protein	P02766	Transthyretin OS=Homo sapiens OX=9606 GN=TTR PE=1 SV=1	0	288.657	73	16	3448	16	147	15.9	5.76	1323.42	1294.91	526.68	1786.76	2514.7	1493.68	13	12	12	16	14	13	7276	TTR	hsa:7276; P02766; Q549C7; Q6IB96; Q9UBZ6; Q9UCM9	ENSG00000118271		6	0	3503696812	1168512116	1466341241	2157819163	1363299292	643213042	2482683264	5.77098e+08	5.67457e+08	1.35158e+08	1171625582	1794657544	1033930358	8.92814e+08	1980072112	1130819739	1723781744	1654107430
High	Master Protein	P00441	Superoxide dismutase [Cu-Zn] OS=Homo sapiens OX=9606 GN=SOD1 PE=1 SV=2	0	288.416	87	15	3049	15	154	15.9	6.13	833.46	780.6	385.35	1205.16	1267.49	1482.74	13	12	11	13	12	15	6647	SOD1	A6NHJ0; D3DSE4; hsa:6647; P00441; Q16669; Q16711; Q16838; Q16839; Q16840; Q6NR85	ENSG00000142168	Selenium micronutrient network; Vitamin B12 metabolism; Folate metabolism; AGE/RAGE pathway; Dopamine metabolism; Amyotrophic lateral sclerosis (ALS); Trans-sulfuration, one-carbon metabolism and related pathways; Copper homeostasis; Physico-chemical features and toxicity-associated pathways; Oxidative stress response; Extracellular vesicles in the crosstalk of cardiac cells; Arsenic metabolism a…	15	0	2769232811	1421788826	3676742576	3807663005	8.88317e+08	5.43037e+08	2368540461	3127154319	2231188911	1646701744	1529686863	1216033102	1045101901	1780573417	1786919068	2132606790	1000988869	1095297062
High	Master Protein	P68871	Hemoglobin subunit beta OS=Homo sapiens OX=9606 GN=HBB PE=1 SV=2	0	288.385	96	17	11426	10	147	16	7.28	3808.4	4564.58	1451.32	4424.04	4852.01	3467.74	15	15	13	14	17	15	3043	HBB	A4GX73; B2ZUE0; hsa:3043; P02023; P68871; Q13852; Q14481; Q14510; Q45KT0; Q549N7; Q6FI08; Q6R7N2; Q8IZI1; Q9BX96; Q9UCD6; Q9UCP8; Q9UCP9	ENSG00000244734	Selenium micronutrient network; Vitamin B12 metabolism; Folate metabolism	12	8	88904609433	10905336767	71541379619	8752874283	11406836041	21923012649	20213593863	9029235900	13586769035	1491432369	15798329779	8738319236	9818603081	22794482878	9943538946	10178159350	15326693315	7240604473
High	Master Protein	Q15084	Protein disulfide-isomerase A6 OS=Homo sapiens OX=9606 GN=PDIA6 PE=1 SV=1	0	288.248	57	27	3337	27	440	48.1	5.08	903.39	1044.16	371.55	1711.18	1810.18	1976.44	18	19	16	23	22	26	10130	PDIA6	B3KY95; B5MCQ5; B7Z254; B7Z4M8; F8WA83; hsa:10130; Q15084; Q53RC7; Q6ZSH5; Q99778	ENSG00000143870	Photodynamic therapy-induced unfolded protein response; VEGFA-VEGFR2 signaling	5	0	1928012538	1566272401	1463640823	2420573264	7.59765e+08	7.39291e+08	1710314500	1393097998	1535181763	5.54209e+08	1644711095	2059246580	1959665247	2687111572	2410935110	2870816483	2125902789	2814383456
High	Master Protein	Q14203-3	Isoform 3 of Dynactin subunit 1 OS=Homo sapiens OX=9606 GN=DCTN1	0	287.981	35	41	1021	41	1236	136.7	5.4	185.81	236.35	39	349.45	371.13	477.65	27	22	15	34	35	34		DCTN1	Q14203-3			0	0	1100377928	8.36299e+08	8.72783e+08	7.34165e+08	6.1665e+08	5.38318e+08	5.73357e+08	7.30789e+08	6.00336e+08	5.46837e+08	7.20719e+08	5.96804e+08	5.92559e+08	1020252318	816967606	6.69897e+08	7.74669e+08	8.24213e+08
High	Master Protein	Q15019	Septin-2 OS=Homo sapiens OX=9606 GN=SEPTIN2 PE=1 SV=1	0	287.933	64	25	1439	25	361	41.5	6.6	282.36	327.53	127.35	632.62	646	604.94	18	18	15	20	24	24	4735	SEPTIN2	B4DGE8; hsa:4735; Q14132; Q15019; Q53QU3; Q8IUK9; Q96CB0	ENSG00000168385	2q37 copy number variation syndrome	2	0	6.84025e+08	8.6263e+08	4.84467e+08	1051429547	4.04279e+08	6.25634e+08	793083239	8.72595e+08	783045011	3.81005e+08	713984312	8.23302e+08	8.5384e+08	9.19101e+08	9.5196e+08	8.32721e+08	9.94302e+08	1310930052
High	Master Protein	P32754	4-hydroxyphenylpyruvate dioxygenase OS=Homo sapiens OX=9606 GN=HPD PE=1 SV=2	0	287.149	65	28	2782	28	393	44.9	7.01	903.67	742.91	220.95	957.43	1136.81	1109	22	19	19	21	24	24	3242	HPD	A8K461; B3KQ63; hsa:3242; P32754; Q13234	ENSG00000158104		1	0	2439852429	3559935625	1719833545	2096526419	4648325136	5319144597	2974784885	2416889454	1168605661	1742729618	5782551452	4940904256	4634011248	1511228512	2483627938	9.26965e+08	2865595400	2058261986
High	Master Protein	P31946	14-3-3 protein beta/alpha OS=Homo sapiens OX=9606 GN=YWHAB PE=1 SV=3	0	287.066	73	22	7152	12	246	28.1	4.83	1215.89	1429.71	606.98	2412.3	2461.72	2443.25	22	20	19	22	22	21	7529	YWHAB	A8K9K2; E1P616; hsa:7529; P31946	ENSG00000166913	Cell cycle; IL-3 signaling pathway; Myometrial relaxation and contraction pathways; Hepatitis B infection; Calcium regulation in cardiac cells; Sudden infant death syndrome (SIDS) susceptibility pathways	33	0	2199350620	1915011858	3989113125	2338862491	1812634969	4245852150	2815931805	3615349257	4054120576	1868922826	1889619653	1482388510	2075886710	1853273181	1906441764	1949803617	1719979968	1128461218
High	Master Protein	Q9UEY8-2	Isoform 1 of Gamma-adducin OS=Homo sapiens OX=9606 GN=ADD3	0	286.15	48	36	1140	36	674	75.6	6.81	260.17	295.51	34.2	408.55	315.12	552	21	27	10	26	23	33		ADD3	Q9UEY8-2			0	0	7.48654e+08	8.36423e+08	6.62392e+08	9.36684e+08	9.43933e+08	8.87434e+08	5.76764e+08	7.59694e+08	9.49883e+08	1286735182	1213172872	1116928513	9.23465e+08	8.49333e+08	1023510551	8.81429e+08	8.25283e+08	5.00358e+08
High	Master Protein	P51858	Hepatoma-derived growth factor OS=Homo sapiens OX=9606 GN=HDGF PE=1 SV=1	0	283.924	77	25	2205	23	240	26.8	4.73	287.85	393.06	179.72	515.5	630.64	783.11	20	18	17	21	22	24	3068	HDGF	B3KU21; D3DVC9; hsa:3068; P51858; Q5SZ07; Q5SZ08; Q5SZ09	ENSG00000143321	IL-18 signaling pathway	2	3	1279134555	1504667942	1554024987	1501152151	1368074606	1644254301	1410377836	1548543384	1855853554	1278524435	1252355231	8.31799e+08	1153949993	1404842644	1458963428	1670027117	1416222569	5.0002e+08
High	Master Protein	O60749	Sorting nexin-2 OS=Homo sapiens OX=9606 GN=SNX2 PE=1 SV=2	0	283.096	51	30	3317	28	519	58.4	5.12	926.41	965.27	251.49	1479.44	1473.79	1506.5	27	25	19	28	28	29	6643	SNX2	B3KN44; B4DEK4; B7Z408; hsa:6643; O43650; O60749; P82862; Q53XK8; Q597H6; Q9BTS8	ENSG00000205302		1	2	1620470503	2015488004	1607406965	2188372394	2037598515	1849961456	2100669536	1949143812	2181578453	1304404847	2221798770	2092379578	2138798587	2411530304	2156485991	2126012456	1849919421	1761922312
High	Master Protein	P31150	Rab GDP dissociation inhibitor alpha OS=Homo sapiens OX=9606 GN=GDI1 PE=1 SV=2	0	282.891	54	29	1951	19	447	50.6	5.14	332.62	416.28	112.67	624.37	619.09	706.02	23	23	17	24	25	28	2664	GDI1	hsa:2664; P31150; P50394; Q6FG50; Q7Z2G6; Q7Z2G9; Q7Z2H5; Q7Z2I6	ENSG00000203879	Ciliary landscape; Airway smooth muscle cell contraction; 10q11.21q11.23 copy number variation syndrome	4	0	2.52104e+08	2.82239e+08	2.06364e+08	3.63165e+08	143755716	1.79102e+08	1.08653e+08	1.74758e+08	1.3675e+08	2.01966e+08	2.17489e+08	2.11627e+08	1.94219e+08	3.70931e+08	2.92897e+08	2.83144e+08	2.64584e+08	221923444
High	Master Protein	Q9Y4E1-1	Isoform 4 of WASH complex subunit 2C OS=Homo sapiens OX=9606 GN=WASHC2C	0	282.302	33	33	930	3	1318	144.6	4.79	167.8	174.18	64.25	363.2	424.65	384.38	17	17	14	23	28	28		WASHC2C	Q9Y4E1-1			0	0	3.124e+06	6.35227e+06	2.5731e+07	2.13648e+07	8.36299e+06		10396307	1.90014e+07		2.66897e+06	1.91723e+07	1.22257e+07	1.47263e+07	6.56438e+06	5.82453e+06	3.95059e+06	1.11574e+07	50479017
High	Master Protein	P98082	Disabled homolog 2 OS=Homo sapiens OX=9606 GN=DAB2 PE=1 SV=3	0	281.953	35	33	3321	33	770	82.4	5.53	575.08	826.04	310.14	1170.45	1254.45	1264.01	26	28	25	29	31	32	1601	DAB2	A6NES5; hsa:1601; P98082; Q13598; Q9BTY0; Q9UK04	ENSG00000153071	Endoderm differentiation	5	0	1668235231	1828393435	2094674497	2215941932	2343555268	1803385254	2505253904	1702317072	1139256085	1796687418	2553868077	1789763131	1654953039	1641363368	2377160700	1433262259	1432796784	1769811272
High	Master Protein	Q96HC4	PDZ and LIM domain protein 5 OS=Homo sapiens OX=9606 GN=PDLIM5 PE=1 SV=5	0	280.296	45	26	2646	13	596	63.9	8.21	598.08	651.85	226.55	1043.17	1063.6	1050.81	24	23	17	25	26	26	10611	PDLIM5	A8K6F9; D6RB78; E9PBF5; hsa:10611; O60705; Q56VN4; Q5UW38; Q8WVK0; Q96HC4	ENSG00000163110	Extracellular vesicles in the crosstalk of cardiac cells	2	14	1087179089	1243085096	1406871782	1437242848	6.32373e+08	9.61735e+08	9.82304e+08	1245312885	1714276237	8.70289e+08	1000158466	9.68841e+08	1104714878	1217953152	1254118936	1538734611	1324286472	6.37448e+08
High	Master Protein	P16444	Dipeptidase 1 OS=Homo sapiens OX=9606 GN=DPEP1 PE=1 SV=3	0	279.647	60	22	3312	22	411	45.6	6.15	532.47	984.53	121.94	1083.16	554.06	1453.06	11	18	10	18	14	22	1800	DPEP1	D3DX80; hsa:1800; P16444; Q96AK2	ENSG00000015413	Eicosanoid metabolism via lipooxygenases (LOX); Leukotriene metabolic pathway	5	0	1811134095	1111319702	2116401198	4133620358	2515509173	1820349441	2136834706	2395051869	2859287297	3756698483	2015782896	4166340064	1238251908	9.98916e+08	1750019462	4.34907e+08	8.35091e+08	6.67907e+08
High	Master Protein	Q92945	Far upstream element-binding protein 2 OS=Homo sapiens OX=9606 GN=KHSRP PE=1 SV=4	0	279.529	53	32	2834	27	711	73.1	7.3	547.82	664.92	288.35	1059.69	1165.47	1144.08	26	28	25	31	30	29	8570	KHSRP	hsa:8570; O00301; Q59EZ9; Q5U4P6; Q92945; Q9UNT5; Q9UQH5	ENSG00000088247	Pre-implantation embryo	3	5	1276094648	1708510145	1369906898	1357308126	1826624692	1826335072	1782005767	1917939548	1611576845	1205641701	1495065770	1284613620	3224974414	1723427574	1795404045	1736366140	1900912023	1331460709
High	Master Protein	P13010	X-ray repair cross-complementing protein 5 OS=Homo sapiens OX=9606 GN=XRCC5 PE=1 SV=3	0	276.928	47	39	1833	39	732	82.7	5.81	346.66	423.21	100.63	710.22	603.92	756.98	24	26	15	37	32	33	7520	XRCC5	A8K3X5; hsa:7520; P13010; Q0Z7V0; Q4VBQ5; Q53HH7; Q7M4N0; Q9UCQ0; Q9UCQ1	ENSG00000079246	Non-homologous end joining; Male infertility; DNA repair pathways, full network; p53 transcriptional gene network; 10q11.21q11.23 copy number variation syndrome	10	0	4.40404e+08	6.72083e+08	4.48742e+08	7.62718e+08	5.51118e+08	7.41288e+08	7.40765e+08	7.90602e+08	8.69055e+08	5.48963e+08	4.86523e+08	7.28515e+08	8.49357e+08	1081166979	9.40934e+08	844118855	8.14923e+08	1303911730
High	Master Protein	Q14103	Heterogeneous nuclear ribonucleoprotein D0 OS=Homo sapiens OX=9606 GN=HNRNPD PE=1 SV=1	0	275.839	43	24	3587	3	355	38.4	7.81	623.8	724.75	295.79	1162.36	1155.92	1260.19	20	19	18	22	23	22	3184	HNRNPD	A8K9J2; hsa:3184; P07029; Q01858; Q14100; Q14101; Q14102; Q14103; Q4W5A1; Q9UCE8; Q9UCE9	ENSG00000138668	mRNA processing	3	30	1961636188	2923866084	1897496006	2635250369	1905391179	2344718310	3453690868	3259669263	2953990238	1020126179	2371098236	2071298759	3061028414	2956246061	2799581897	3701341658	2928237145	2260776654
High	Master Protein	O94925-3	Isoform 3 of Glutaminase kidney isoform, mitochondrial OS=Homo sapiens OX=9606 GN=GLS	0	275.175	48	26	2862	3	598	65.4	7.88	701.37	840.78	214.03	1141.65	1118.67	1498.29	18	19	14	20	24	23		GLS	O94925-3			0	0	4.54737e+06	8.10598e+06	2.00867e+07	4317726		1.78749e+07	17947.7	8.5924e+07		5.6084e+06	4.07863e+06	4.14277e+06	2.60903e+07	6.84598e+06	1.09798e+07	1.47061e+07	3.15036e+07	9.42628e+06
High	Master Protein	P16662	UDP-glucuronosyltransferase 2B7 OS=Homo sapiens OX=9606 GN=UGT2B7 PE=1 SV=2	0	273.947	34	16	4632	16	529	60.7	8.31	1189.31	1422.47	290.88	1866.37	1597.7	1827.76	14	14	10	16	13	16	7364	UGT2B7	B2R810; hsa:7364; P16662; Q6GTW0	ENSG00000171234	Codeine and morphine metabolism; Nuclear receptors meta-pathway; NRF2 pathway; Tamoxifen metabolism; Estrogen metabolism; Glucuronidation; Metapathway biotransformation Phase I and II	10	0	2274824212	1705703519	2520099625	4530547989	2127207795	2827244641	3527659973	3863154154	3310804036	1826313060	3276820035	3856673094	2094601278	1728091260	3717686582	1514302552	1975585647	3236303955
High	Master Protein	P37802	Transgelin-2 OS=Homo sapiens OX=9606 GN=TAGLN2 PE=1 SV=3	0	273.889	70	21	7937	20	199	22.4	8.25	1882.72	2136.43	998.55	3587.75	3481.46	2947.58	18	18	17	21	20	19	8407	TAGLN2	E9KL39; hsa:8407; P37802; Q5JRQ6; Q5JRQ7; Q6FGI1; Q9BUH5; Q9H4P0	ENSG00000158710		1	3	10094540164	9870331219	8022601075	8260804204	4522871770	10073085595	7358558563	13135420491	11680289356	4483524481	6554900430	6326786491	7536068043	9169260927	9489792954	15547906877	10769985387	7509883447
High	Master Protein	Q9UPN3-5	Isoform 4 of Microtubule-actin cross-linking factor 1, isoforms 1/2/3/4/5 OS=Homo sapiens OX=9606 GN=MACF1	0	273.254	12	59	479	3	5938	669.7	5.3	68.17	47.68	10.14	161.62	142.4	165.03	15	19	4	37	35	47		MACF1	Q9UPN3-5			0	0	8.05083e+06	2.18477e+07		14542447	2.08845e+06	535597	5.28292e+06	7.45963e+06		7.5626e+06	2.0544e+07	1.69213e+07	1.44073e+07	3.20678e+07	2.74345e+07	1.96048e+07	2.31267e+07	4.27928e+07
High	Master Protein	O00468-6	Isoform 6 of Agrin OS=Homo sapiens OX=9606 GN=AGRN	0	273.115	20	37	3153	37	2045	214.7	6.4	622.29	743.86	264.93	1360.98	1057.97	1367.08	29	31	25	34	32	31		AGRN	O00468-6			0	0	1345620390	1387178619	1146699612	2230400559	8.61339e+08	1507561837	1097578308	1142806142	1443335043	1304188145	1623871620	1862279515	1766610511	1800103020	1885823630	1787788780	1775711917	1673384803
High	Master Protein	P16152	Carbonyl reductase [NADPH] 1 OS=Homo sapiens OX=9606 GN=CBR1 PE=1 SV=3	0	273.106	78	21	4341	21	277	30.4	8.32	1203.6	1427.58	566.41	1902.94	2195.82	2309.69	18	18	16	20	19	18	873	CBR1	B2RBZ7; B4DFK7; hsa:873; P16152; Q3LHW8	ENSG00000159228	Nuclear receptors meta-pathway; NRF2 pathway; Prostaglandin synthesis and regulation	4	0	2397651474	3024533012	2804452786	3352994266	1603609234	1412927426	2219883956	2035294722	2521760648	7.25185e+08	2115078420	2749590503	3308049793	2812284870	2821217199	1572582357	2515706356	3074133132
High	Master Protein	Q9NVS9	Pyridoxine-5'-phosphate oxidase OS=Homo sapiens OX=9606 GN=PNPO PE=1 SV=1	0	272.006	62	20	1844	20	261	30	7.06	386.63	613.81	186.41	451.92	672.32	1049.1	16	14	13	19	18	18	55163	PNPO	B4E0V0; B4E152; B4E1D7; D3DTT9; hsa:55163; Q9NVS9	ENSG00000108439	Selenium micronutrient network; Vitamin B6-dependent and responsive disorders	3	0	9.46516e+08	4.00517e+08	1339270624	1304131134	132259831	3.20788e+08	5.48257e+08	463899839	8.00215e+08	1.88798e+08	6.57847e+08	8.06693e+08	6.9587e+08	4.3145e+08	8.47896e+08	4.1983e+08	4.88826e+08	1.61473e+08
High	Master Protein	P27144	Adenylate kinase 4, mitochondrial OS=Homo sapiens OX=9606 GN=AK4 PE=1 SV=1	0	270.991	83	23	3618	23	223	25.3	8.4	738.93	902.46	284.04	908.95	1017.07	1809.54	19	19	19	22	18	21	205	AK4	B2R927; D3DQ62; hsa:205; P27144; Q6IBH4; Q6NXQ5; Q8IUU9	ENSG00000162433	CCL18 signaling pathway	2	0	1982567867	1143557378	4354636093	2955145044	1411575507	6.09816e+08	2024839223	1437488672	1533831054	1409599100	1690689794	2336451034	1387988483	7.89838e+08	1747986585	9.7106e+08	1045272388	7.29102e+08
High	Master Protein	O94875-12	Isoform 12 of Sorbin and SH3 domain-containing protein 2 OS=Homo sapiens OX=9606 GN=SORBS2	0	270.659	48	35	3083	6	731	80.9	9.44	824.83	865.3	321.56	1128.45	1128.33	985.12	30	30	27	31	29	30		SORBS2	O94875-12			0	34	1604518406	1829784173	8.24036e+08	9.43796e+08	7.92904e+08	1068238484	1089332671	861552868	1485851667	1450533458	9.53723e+08	1014081954	1173960412	9.40426e+08	1146013910	1270150835	1143027688	1056204722
High	Master Protein	P35611	Alpha-adducin OS=Homo sapiens OX=9606 GN=ADD1 PE=1 SV=2	0	270.266	39	30	2301	29	737	80.9	5.83	517.45	715.91	156.11	920.88	800.29	1003.96	21	20	14	23	23	30	118	ADD1	A2A3N8; A2A3P0; B4DI79; D3DVR3; D3DVR4; D3DVR5; hsa:118; P35611; Q13734; Q14729; Q16156; Q86XM2; Q9UJB6	ENSG00000087274		3	2	1715569643	1463326334	977202596	1669613825	1363109469	1463843013	1379548448	1636102017	1788815870	1160322639	1638579262	1724754643	1591955048	1609182418	2257051578	1827883069	1652693290	1383877981
High	Master Protein	Q07065	Cytoskeleton-associated protein 4 OS=Homo sapiens OX=9606 GN=CKAP4 PE=1 SV=2	0	269.254	62	38	1554	36	602	66	5.92	332.78	406.17	144.45	776.88	627.68	511.55	26	23	27	33	31	28	10970	CKAP4	hsa:10970; Q07065; Q504S5; Q53ES6	ENSG00000136026		6	1	7.28995e+08	1097769514	5.04829e+08	6.58143e+08	6.21972e+08	8.51921e+08	1191908138	1158531762	1522097766	5.97826e+08	7.72925e+08	7.13006e+08	1089067736	1629219318	1325774053	1378433323	1142032869	1094022073
High	Master Protein	O95154	Aflatoxin B1 aldehyde reductase member 3 OS=Homo sapiens OX=9606 GN=AKR7A3 PE=1 SV=2	0	269.151	51	15	3093	10	331	37.2	7.15	864.2	991.85	273.57	967.92	1430.17	1660.12	14	15	14	14	15	15	22977	AKR7A3	hsa:22977; O95154; Q86SR4; Q8IVN6; Q8N5V6; Q8TAX1; Q9NUC3	ENSG00000162482	Aflatoxin B1 metabolism; Metapathway biotransformation Phase I and II	3	8	1235874654	6.38906e+08	1577895932	2168821290	7.8172e+08	542238204	1428636688	8.78625e+08	7.8819e+08	4.35787e+08	9.05218e+08	2317710843	1401666329	5.2821e+08	1096881755	2.43508e+08	9.52218e+08	5.85124e+08
High	Master Protein	Q04695	Keratin, type I cytoskeletal 17 OS=Homo sapiens OX=9606 GN=KRT17 PE=1 SV=2	0	267.951	56	35	4133	13	432	48.1	5.02	883.5	1040.32	260.28	1390.9	1547.91	1240.4	25	29	17	27	31	31	3872	KRT17	A5Z1M9; A5Z1N0; A5Z1N1; A5Z1N2; A6NDV6; A6NKQ2; hsa:3872; Q04695; Q6IP98; Q8N1P6	ENSG00000128422	1p36 copy number variation syndrome	3	0	103732437	1.86138e+08	6.06276e+07	5.59843e+07	249928465	1.49591e+08	3.8753e+07	9.16196e+07	9.96689e+07	8.44117e+07	202979031	1.31359e+08	1.51073e+08	1.08066e+08	6.24419e+07	1.0613e+08	7.28899e+07	6.92526e+07
High	Master Protein	P42330	Aldo-keto reductase family 1 member C3 OS=Homo sapiens OX=9606 GN=AKR1C3 PE=1 SV=4	0	266.636	69	23	2715	17	323	36.8	7.94	624.16	730.12	169.71	866.72	947.93	1568.65	19	18	14	18	19	20	8644	AKR1C3	A8K2V0; B4DL37; hsa:8644; P42330; Q5T2L1; Q96DJ1; Q96KI8; Q99530; Q9UCX1; Q9UII3; Q9UKL9	ENSG00000196139	Ferroptosis; Benzo(a)pyrene metabolism; Metapathway biotransformation Phase I and II; Prostaglandin synthesis and regulation	10	6	9.40107e+08	1110056335	1559739522	1486527310	1318282555	1395827626	5.11742e+08	1319203596	3283717761	6.69452e+08	1374120593	2064239529	1785765963	8.55402e+08	1000162994	6.26657e+08	1228934382	5.29815e+08
High	Master Protein	Q92841	Probable ATP-dependent RNA helicase DDX17 OS=Homo sapiens OX=9606 GN=DDX17 PE=1 SV=2	0	266.451	47	37	3489	29	729	80.2	8.27	727.72	774.25	250.96	1262.58	1352.31	1301.02	33	29	27	33	34	36	10521	DDX17	B1AHM0; H3BLZ8; hsa:10521; Q69YT1; Q6ICD6; Q92841	ENSG00000100201	Novel intracellular components of RIG-I-like receptor pathway	2	11	1152350592	1424109235	9.60244e+08	1564509365	1452666833	1222293026	1364958651	1220644574	1231189813	6.44897e+08	1220525482	1263485162	1686929752	1539770473	1751683926	1747682873	1562332065	1902288392
High	Master Protein	Q9Y6R1-2	Isoform 2 of Electrogenic sodium bicarbonate cotransporter 1 OS=Homo sapiens OX=9606 GN=SLC4A4	0	266.317	22	24	1458	24	1035	116	6.83	300.36	401.23	78.88	531.55	525.63	837.09	19	18	10	20	20	22		SLC4A4	Q9Y6R1-2			0	0	4.12823e+08	5.04211e+08	7.19396e+08	1212130586	1837829638	8.6975e+08	1115339091	6.33994e+08	1021002242	9.88059e+08	8.20691e+08	1318372766	8.19266e+08	7.16519e+08	9.28378e+08	3.35852e+08	4.23009e+08	4.48705e+08
High	Master Protein	P33176	Kinesin-1 heavy chain OS=Homo sapiens OX=9606 GN=KIF5B PE=1 SV=1	0	266.278	42	40	1438	32	963	109.6	6.51	293.02	311	85.24	540.43	516.75	595.76	28	22	14	34	36	35	3799	KIF5B	A0AVB2; hsa:3799; P33176; Q5VZ85	ENSG00000170759	Alzheimer's disease and miRNA effects; Envelope proteins and their potential roles in EDMD physiopathology; Insulin signaling; CCL18 signaling pathway; Alzheimer's disease	12	9	739898011	1078764595	1193735499	8.7698e+08	7.42518e+08	7.16869e+08	1241375226	9.45366e+08	9.45431e+08	654022124	8.49872e+08	7.59597e+08	9.67146e+08	1130784952	9.51471e+08	1078668285	8.18508e+08	9.68202e+08
High	Master Protein	P33121	Long-chain-fatty-acid--CoA ligase 1 OS=Homo sapiens OX=9606 GN=ACSL1 PE=1 SV=1	0	265.953	43	33	3221	33	698	77.9	7.15	493	610.17	138.3	728.85	622.87	922.26	28	28	19	30	29	30	2180	ACSL1	B7Z452; D3DP57; hsa:2180; P33121; P41215; Q8N8V7; Q8TA99	ENSG00000151726	Fatty acid beta-oxidation; Fatty acid biosynthesis; Mitochondrial long chain fatty acid beta-oxidation; PPAR signaling pathway; Ferroptosis; Thermogenesis; Cholesterol metabolism with Bloch and Kandutsch-Russell pathways; Omega-3 / omega-6 fatty acid synthesis; Omega-9 fatty acid synthesis; Fatty acid transporters; Mitochondrial fatty acid oxidation disorders; Fatty Acids and Lipoproteins Transpo…	17	0	1887530927	1569111685	2192366265	2678454976	1765308263	1357130289	1297975738	1589735898	1459896509	1943401917	1504652364	1478245649	7.73328e+08	2205648811	2349711737	1755001622	1438377171	1462072464
High	Master Protein	Q6NVY1	3-hydroxyisobutyryl-CoA hydrolase, mitochondrial OS=Homo sapiens OX=9606 GN=HIBCH PE=1 SV=2	0	265.766	50	26	3869	26	386	43.5	8.19	724.12	1105.33	235.36	1043.55	1097.39	1898.09	23	22	18	21	24	26	26275	HIBCH	D3DPI4; hsa:26275; Q53GA8; Q53GF2; Q53RF7; Q53TC6; Q6NVY1; Q92931; Q9BS94	ENSG00000198130	Amino acid metabolism	2	0	1291001998	1175609596	3412713919	2395943797	1527478302	1204103379	1779446087	1757867216	3232845498	1184932167	1390547364	3141243084	1872428888	6.83914e+08	1389620845	9.1874e+08	1191995362	1558701318
High	Master Protein	P25311	Zinc-alpha-2-glycoprotein OS=Homo sapiens OX=9606 GN=AZGP1 PE=1 SV=2	0	265.74	58	22	2784	22	298	34.2	6.05	545.9	751.19	444.14	1061.02	1051.75	835.52	18	17	19	20	21	20	563	AZGP1	D6W5T8; hsa:563; O60386; P25311; Q5XKQ4; Q8N4N0	ENSG00000160862		1	0	1516537820	2041057265	2007967573	8.94287e+08	1559018817	1388098855	1492819672	1291841435	1253398741	1258237729	1898991155	1661114003	1863969421	1771361889	1525308799	1797239095	2243957730	1025381816
High	Master Protein	P16402	Histone H1.3 OS=Homo sapiens OX=9606 GN=H1-3 PE=1 SV=2	0	265.348	41	21	7684	3	221	22.3	11.02	2117.69	2379.38	877.57	4272.9	3123.94	2847.7	20	19	19	21	21	21	3007	H1-3	B2R751; hsa:3007; P16402; Q2M2I2	ENSG00000124575		2	0	6.15025e+07	2.0822e+08	3.56601e+07	3.06282e+08	1.11008e+08	1.9253e+08	2.03179e+08	2.43027e+08	4.52089e+08	1.18821e+07	1.54108e+08	205842075	5.52802e+08	5.09421e+08	210649497	2.66011e+08	6.41689e+08	4.77208e+08
High	Master Protein	P07339	Cathepsin D OS=Homo sapiens OX=9606 GN=CTSD PE=1 SV=1	0	265.033	42	23	6279	23	412	44.5	6.54	1287.14	1195.89	676.93	2258.8	2546.06	2341.17	20	18	19	23	22	21	1509	CTSD	hsa:1509; P07339; Q6IB57	ENSG00000117984	Prolactin signaling pathway	7	0	3637818319	5307189953	5254174404	4094262498	2130202764	1786978157	3762711133	3145671104	2293315828	1507740754	2906386998	2653974320	2836595395	4353558275	6543558752	5089461666	4158462766	4621010158
High	Master Protein	P19801	Amiloride-sensitive amine oxidase [copper-containing] OS=Homo sapiens OX=9606 GN=AOC1 PE=1 SV=4	0	264.937	34	25	2910	25	751	85.3	7.09	797.03	1058.33	191.15	1437.38	747.77	1179.31	21	24	19	24	23	24	26	AOC1	C9J690; hsa:26; P19801; Q16683; Q16684; Q56II4; Q6GU42	ENSG00000002726	Tryptophan metabolism	3	0	1570468773	1387855731	1102625644	1849435161	3284275811	2241070965	3403230201	1707505018	1407318781	4231419143	1903856883	2702711016	2565828889	1714195831	1879615441	965772713	1184414845	7.45921e+08
High	Master Protein	P07585	Decorin OS=Homo sapiens OX=9606 GN=DCN PE=1 SV=1	0	263.815	55	29	3005	28	359	39.7	8.54	550.81	694.49	233.93	1146.84	663.15	1076.13	27	25	20	28	27	28	1634	DCN	hsa:1634; P07585; Q9P0Z0; Q9P0Z1; Q9Y5N8; Q9Y5N9	ENSG00000011465	Complement system; BMP2-WNT4-FOXO1 pathway in primary endometrial stromal cell differentiation; Markers of kidney cell lineage	15	1	2189223589	2315423966	2224061285	3608707645	1877513439	4191239164	2026890106	3144391553	1793098663	1058632545	5336240476	4452643442	2189087546	1570597606	2414236440	2992801666	2319033725	2104101191
High	Master Protein	Q12931	Heat shock protein 75 kDa, mitochondrial OS=Homo sapiens OX=9606 GN=TRAP1 PE=1 SV=3	0	263.246	44	30	2385	29	704	80.1	8.21	592.91	670.88	198.23	1089.75	930.83	1248.27	26	25	17	25	27	28	10131	TRAP1	B4DR68; D3DUC8; F5H897; hsa:10131; O43642; O75235; Q12931; Q9UHL5	ENSG00000126602	TNF-alpha signaling pathway; Clock-controlled autophagy in bone metabolism	3	0	3.71163e+08	5.87194e+08	4.30739e+08	1242769031	9.6097e+08	7.91761e+08	1190263290	8.73118e+08	7.7353e+08	6.4698e+08	8.82536e+08	1274900967	8.02613e+08	6.18183e+08	1009574331	7.26576e+08	7.55294e+08	6.11441e+08
High	Master Protein	O60313-10	Isoform 4 of Dynamin-like 120 kDa protein, mitochondrial OS=Homo sapiens OX=9606 GN=OPA1	0	263.08	36	39	1351	39	1015	117.7	7.77	251.36	303.89	54.76	430.29	324.99	607.1	32	31	15	33	32	38		OPA1	O60313-10			0	0	4.80938e+08	4.58144e+08	6.48281e+08	8.47375e+08	7.27232e+08	7.01102e+08	8.18908e+08	5.38143e+08	6.28706e+08	700971466	7.31727e+08	7.52116e+08	6.17351e+08	510285556	7.77021e+08	3.26447e+08	4.65889e+08	5.50313e+08
High	Master Protein	P49368	T-complex protein 1 subunit gamma OS=Homo sapiens OX=9606 GN=CCT3 PE=1 SV=4	0	262.988	50	29	2343	29	545	60.5	6.49	456.1	497.49	126.65	843.11	740.83	1009.66	25	23	19	25	28	29	7203	CCT3	A6NE14; hsa:7203; P49368; Q5SZY1; Q9BR64	ENSG00000163468	16p11.2 proximal deletion syndrome	7	0	8.81437e+08	1036476460	8.14346e+08	1368178656	8.57995e+08	9.29914e+08	9.33159e+08	1084127163	1059355301	8.30106e+08	1129355563	1461873595	1297858322	1306047696	1238820522	8.29913e+08	1036927265	1221727668
High	Master Protein	P11177	Pyruvate dehydrogenase E1 component subunit beta, mitochondrial OS=Homo sapiens OX=9606 GN=PDHB PE=1 SV=3	0	262.764	50	18	3242	18	359	39.2	6.65	700.33	982.87	333.4	1268.73	1212.33	1738.56	16	14	13	18	17	17	5162	PDHB	B2R7L0; B4DDD7; hsa:5162; P11177; Q6FH45; Q9BQ27; Q9UFK3	ENSG00000168291	Metabolic reprogramming in colon cancer; Orexin receptor pathway	6	0	1432270781	1406694882	2023312703	2098307575	2046267245	1609840821	1531495557	1584373836	1103266954	6.66566e+08	1664013897	1674696541	1571902252	1302507018	1881245113	881392076	2148223208	2200737715
High	Master Protein	O60656	UDP-glucuronosyltransferase 1A9 OS=Homo sapiens OX=9606 GN=UGT1A9 PE=1 SV=1	0	262.178	34	19	2538	10	530	59.9	7.9	509.68	587.01	85.63	792.34	1009.6	953.19	15	15	9	16	19	17	54600	UGT1A9	B8K285; hsa:54600; O60656; P36509; Q9HAX0	ENSG00000241119	Irinotecan pathway; Nicotine metabolism in liver cells; Codeine and morphine metabolism; Irinotecan pathway; Aryl hydrocarbon receptor pathway; Constitutive androstane receptor pathway; Pregnane X receptor pathway; PPAR-alpha pathway; Nuclear receptors meta-pathway; NRF2 pathway; 2q37 copy number variation syndrome; Arylamine metabolism; Estrogen metabolism; Glucuronidation; Metapathway biotransf…	19	15	8.50251e+08	9.34995e+08	9.04143e+08	1467931380	1484974730	1046339271	1087223274	1060654147	7.69303e+08	1201943971	1124769187	9.18703e+08	3.54438e+08	1657279044	1685775050	1087417203	7.72548e+08	1698905743
High	Master Protein	P11940	Polyadenylate-binding protein 1 OS=Homo sapiens OX=9606 GN=PABPC1 PE=1 SV=2	0	262.028	56	32	2730	24	636	70.6	9.5	534.32	559.62	187.42	914.98	965.91	1020.99	24	22	19	25	30	26	26986	PABPC1	hsa:26986; P11940; Q15097; Q93004	ENSG00000070756	Translation factors; Endoderm differentiation; VEGFA-VEGFR2 signaling; Acute viral myocarditis	11	8	9.08802e+08	1282262415	938267515	1556390639	9.97237e+08	9.17063e+08	1670452140	1069442292	1453463942	4.0348e+08	1117178027	1284974585	1689507311	1492968161	1529497254	1273082514	1769475451	1633131931
High	Master Protein	Q9BSE5	Agmatinase, mitochondrial OS=Homo sapiens OX=9606 GN=AGMAT PE=1 SV=2	0	261.641	47	19	4972	19	352	37.6	7.59	901.89	1259.11	256.56	1456.89	1390.92	1995.66	18	17	15	19	17	19	79814	AGMAT	hsa:79814; Q5TDH1; Q9BSE5; Q9H5J3	ENSG00000116771		1	0	9085097094	3070118018	12001406683	7492438628	4037665858	5975259783	7717828464	3022296376	5341994570	2646776667	5130309608	7411505556	3547707077	2277244924	3730868569	1788094859	3049317106	3181172549
High	Master Protein	P21695	Glycerol-3-phosphate dehydrogenase [NAD(+)], cytoplasmic OS=Homo sapiens OX=9606 GN=GPD1 PE=1 SV=4	0	261.517	68	25	5244	24	349	37.5	6.18	1105.79	1359.7	374.09	1696.84	1597.13	2147.23	20	20	16	19	20	22	2819	GPD1	F8W1L5; hsa:2819; P21695; Q8N1B0	ENSG00000167588	HIF1A and PPARG regulation of glycolysis; Triacylglyceride synthesis	3	1	5154515422	4549535141	6638371894	6553358248	5259202125	4530131385	4390920583	5736211144	6865856614	5885079358	5938156002	6719384547	4070941270	3771333001	5785525301	3061206631	3446543697	3852190761
High	Master Protein	Q9Y4W6	AFG3-like protein 2 OS=Homo sapiens OX=9606 GN=AFG3L2 PE=1 SV=2	0	260.469	40	35	2267	34	797	88.5	8.66	412.13	510.98	135.24	748.32	620.02	722.14	28	29	19	31	27	33	10939	AFG3L2	hsa:10939; Q6P1L0; Q9Y4W6	ENSG00000141385	Ciliary landscape	2	0	6.36087e+08	822406103	9.82564e+08	1265885957	1184664940	1224339020	1168892855	1126090173	1641529206	1111044691	1045505823	1191071614	9.39177e+08	8.70181e+08	1208327941	7.0874e+08	917574728	1138733749
High	Master Protein	P16403	Histone H1.2 OS=Homo sapiens OX=9606 GN=H1-2 PE=1 SV=2	0	260.354	42	20	7832	3	213	21.4	10.93	2144.38	2326.5	821.08	4245.32	3134.55	3095.85	19	18	16	20	20	20	3006	H1-2	A8K4I2; hsa:3006; P16403	ENSG00000187837		2	0	1156084915	4524710832	3027038629	6.0158e+08	2146035497	3575441037	1604707271	3186151202	1045438824	4289471369	3495060876	7.21323e+08	4782003039	3477496316	2746274054	1795503090	3224542434	6.7855e+08
High	Master Protein	Q6IQ23-2	Isoform 2 of Pleckstrin homology domain-containing family A member 7 OS=Homo sapiens OX=9606 GN=PLEKHA7	0	259.667	40	37	859	37	1122	127.2	9.35	115.36	140.48	25.65	186.88	178.23	298.83	25	27	15	28	28	32		PLEKHA7	Q6IQ23-2			0	0	8.05228e+08	1030353896	6.18135e+08	8.13865e+08	9.64531e+08	6.88906e+08	7.47905e+08	7.08922e+08	5.96356e+08	7.43465e+08	7.91123e+08	6.56605e+08	7.45055e+08	6.56001e+08	6.50442e+08	355314342	5.83655e+08	3.80369e+08
High	Master Protein	P50454	Serpin H1 OS=Homo sapiens OX=9606 GN=SERPINH1 PE=1 SV=2	0	259.202	52	23	1731	23	418	46.4	8.69	357.73	385.94	128.82	818.49	844.17	717.11	16	18	14	20	22	19	871	SERPINH1	B3KVJ3; hsa:871; P29043; P50454; Q5XPB4; Q6NSJ6; Q8IY96; Q9NP88	ENSG00000149257	Endochondral ossification; Type I collagen synthesis in the context of osteogenesis imperfecta; Endochondral ossification with skeletal dysplasias; 15q13.3 copy number variation syndrome	5	0	747722435	6.88824e+08	8.79859e+08	9.02034e+08	1.96249e+08	5.56857e+08	6.7723e+08	6.07691e+08	1152874723	3.20208e+08	6.67214e+08	8.45577e+08	7.45851e+08	8.8793e+08	1251327700	1018825166	8.23729e+08	9.40477e+08
High	Master Protein	Q16851	UTP--glucose-1-phosphate uridylyltransferase OS=Homo sapiens OX=9606 GN=UGP2 PE=1 SV=5	0	258.608	58	31	1851	2	508	56.9	8.15	303.68	271.14	95.98	481.29	547.94	719.42	20	23	16	24	27	29	7360	UGP2	hsa:7360; Q07131; Q0P6K2; Q16851; Q86Y81; Q9BU15	ENSG00000169764	Exercise-induced circadian regulation; Glycogen synthesis and degradation; Glucuronidation	5	29	937983344	1014430527	1114458860	1139021370	2743099239	2666699001	1015242045	4901202109	5826448455	8.44665e+08	8.67807e+08	1500271632	1447822402	1033539563	1009282396	5.44406e+08	8.76353e+08	1300992545
High	Master Protein	P38159	RNA-binding motif protein, X chromosome OS=Homo sapiens OX=9606 GN=RBMX PE=1 SV=3	0	258.575	65	38	4070	13	391	42.3	10.05	719.47	754.55	323.34	1332.78	1296.84	1224.31	33	35	28	35	37	36	27316	RBMX	B4E3U4; D3DWH0; E9PG86; hsa:27316; P38159; Q5JQ67; Q8N8Y7; Q969R3	ENSG00000147274	mRNA processing	8	26	2790601800	3073428490	2855571508	3549969510	1982721268	2894864025	3661750950	2959366313	4498477612	2920775680	4147537063	3042325847	3841434781	3430980988	5464874231	3714876396	3527240906	3903296676
High	Master Protein	Q9UMS6-2	Isoform 2 of Synaptopodin-2 OS=Homo sapiens OX=9606 GN=SYNPO2	0	258.447	43	40	991	40	1261	136.3	8.79	234.93	442.81	106.17	376.73	460.26	179.11	31	33	22	25	30	17		SYNPO2	Q9UMS6-2			0	0	8.30272e+08	1103874673	6.7876e+08	4.9167e+08	2.1526e+08	5.04765e+08	3.06067e+08	657067706	5.72103e+08	901401030	7.28556e+08	5.03732e+08	6.65255e+08	7.64113e+08	9.27429e+08	1506182506	8.63459e+08	1012504994
High	Master Protein	P00439	Phenylalanine-4-hydroxylase OS=Homo sapiens OX=9606 GN=PAH PE=1 SV=1	0	257.67	57	33	2756	33	452	51.8	6.6	700.94	853.2	136.46	1002.73	777.12	1154.19	25	28	21	28	27	32	5053	PAH	hsa:5053; P00439; Q16717; Q8TC14	ENSG00000171759	Biogenic amine synthesis; Sudden infant death syndrome (SIDS) susceptibility pathways	4	0	8.97073e+08	6.72487e+08	1175569791	1505863902	1645177225	8.8887e+08	1214747010	790287464	8.87577e+08	7.60302e+08	1549763748	2062434843	1318693155	8.77266e+08	1360791616	799292077	9.23201e+08	8.60762e+08
High	Master Protein	Q15067	Peroxisomal acyl-coenzyme A oxidase 1 OS=Homo sapiens OX=9606 GN=ACOX1 PE=1 SV=3	0	257.292	40	23	732	3	660	74.4	8.16	93.46	137.45	32.75	226.01	160.48	378.38	14	17	11	21	17	21	51	ACOX1	A8K6X8; A8KAA0; B4DK61; F5GYQ8; hsa:51; Q12863; Q15067; Q15068; Q15101; Q16131; Q7Z3W5; Q9UD31	ENSG00000161533	Estrogen receptor pathway; Nuclear receptors meta-pathway; PPAR signaling pathway; Eicosanoid metabolism via cyclooxygenases (COX); Eicosanoid metabolism via lipooxygenases (LOX); Omega-3 / omega-6 fatty acid synthesis	8	22	2.38619e+08	9.08305e+07	2.48321e+08	3.85169e+08	1.93955e+08	2.54069e+08	2.41547e+08	3.59283e+08	3.86505e+08	1.99886e+08	2.75273e+08	3.40193e+08	2.1627e+08	1.58418e+08	2.61534e+08	1.47941e+08	1.46067e+08	3.4057e+08
High	Master Protein	Q9C0C2	182 kDa tankyrase-1-binding protein OS=Homo sapiens OX=9606 GN=TNKS1BP1 PE=1 SV=4	0	257.181	33	42	1005	42	1729	181.7	4.86	147.15	138.19	73.36	259.23	413.12	307.6	29	25	23	29	36	31	85456	TNKS1BP1	A7E2F8; hsa:85456; Q6PJ35; Q6ZV74; Q9C0C2	ENSG00000149115	Ciliary landscape	3	0	1925515567	2752912294	2868853959	1694964622	4.22337e+08	5119579386	1023928565	2108412277	2466063921	5.5537e+08	4038698324	1906764205	3631818763	2509706043	1711133195	2559617146	6805362139	4980439374
High	Master Protein	P42224	Signal transducer and activator of transcription 1-alpha/beta OS=Homo sapiens OX=9606 GN=STAT1 PE=1 SV=2	0	256.796	44	34	758	34	750	87.3	6.05	69.54	104.97	25.26	378.04	383.68	367.44	15	18	10	27	30	27	6772	STAT1	A8K989; B2RCA0; D2KFR8; D3DPI7; hsa:6772; P42224; Q53S88; Q53XW4; Q68D00; Q9UDL5	ENSG00000115415	IL-5 signaling pathway; RANKL/RANK signaling pathway; Thyroid stimulating hormone (TSH) signaling pathway; Leptin signaling pathway; Prolactin signaling pathway; IL-7 signaling pathway; Type III interferon signaling; IL-9 signaling pathway; Thymic stromal lymphopoietin (TSLP) signaling pathway; AGE/RAGE pathway; Allograft rejection; Interleukin-11 signaling pathway; Adipogenesis; Oncostatin M sig…	79	0	2.3366e+08	4.31398e+08	2.76461e+08	2.69692e+08	2.29646e+08	2.31637e+08	3.79972e+08	406729952	4.28312e+08	2.66005e+08	2.65521e+08	1.78757e+08	4.10327e+08	1649363936	5.12129e+08	6.53053e+08	399514558	1036122603
High	Master Protein	P51608-2	Isoform B of Methyl-CpG-binding protein 2 OS=Homo sapiens OX=9606 GN=MECP2	0	256.658	50	29	1711	29	498	53.3	9.88	365.57	517.29	205.88	720.05	695.2	909.87	19	22	20	22	26	27		MECP2	P51608-2			0	0	1182301664	1145035242	1444184765	1103114199	1726614293	1727572541	882316363	1860281206	1529723801	1349513454	1112619469	8.17437e+08	1132713966	1144464819	1157389246	6.78339e+08	1118336993	6.71278e+08
High	Master Protein	P15313	V-type proton ATPase subunit B, kidney isoform OS=Homo sapiens OX=9606 GN=ATP6V1B1 PE=1 SV=3	0	255.366	46	23	2343	11	513	56.8	5.66	568.88	634.88	139.81	909.22	854.45	1258.91	18	19	11	20	19	22	525	ATP6V1B1	hsa:525; P15313; Q53FY0; Q6P4H6	ENSG00000116039	Proximal tubule transport	6	0	2.93052e+08	3.47016e+08	4.23489e+08	4.82723e+08	3.5523e+08	4.12991e+08	3.19851e+08	2.45664e+08	318759901	2.0644e+08	4.09298e+08	4.96415e+08	5.30998e+08	3.90263e+08	6.70146e+08	4.32886e+08	3.63408e+08	6.18018e+08
High	Master Protein	P05937	Calbindin OS=Homo sapiens OX=9606 GN=CALB1 PE=1 SV=2	0	254.179	50	21	2389	21	261	30	4.83	519.52	526.34	175.12	687.61	684.12	1385.46	18	16	14	15	18	21	793	CALB1	B2R696; B7Z9J4; hsa:793; P05937	ENSG00000104327		1	0	1279440670	1524557239	6377584821	2797107713	2992058223	2696561315	2298309694	2595734356	1880468034	2158182401	2043469028	1571942380	9.9442e+08	2167774871	1187009172	1082808045	1100210676	9.87789e+08
High	Master Protein	O75936	Gamma-butyrobetaine dioxygenase OS=Homo sapiens OX=9606 GN=BBOX1 PE=1 SV=1	0	254.001	44	22	3438	22	387	44.7	6.74	727.17	1023.55	317.27	1238.93	1360.86	1314.24	18	19	17	19	21	21	8424	BBOX1	B2R8L7; D3DQZ1; hsa:8424; O75936; Q6IBJ2	ENSG00000129151		1	0	2061540500	1190383752	1944561801	2430482865	2017806059	1622285480	3115054200	2870715613	2512919045	1780724588	3008101268	2131176398	2178554066	1449964467	2161044247	2059022295	1481664319	2701715298
High	Master Protein	O94875-7	Isoform 7 of Sorbin and SH3 domain-containing protein 2 OS=Homo sapiens OX=9606 GN=SORBS2	0	252.658	28	31	2967	2	1004	113.5	8.68	846.67	851.55	308.48	1144.25	1094.51	979.34	28	27	25	27	25	27		SORBS2	O94875-7			0	0	7.68568e+07	6.00696e+07	7.43392e+07	57409104	68710.3	3.76848e+07	5.33766e+07	3.03698e+07	5.24259e+07	1.61212e+07	6.45389e+07	6.22027e+07	6.7268e+07	3.18151e+07	4.55372e+07	2.86495e+07	4.63311e+07
High	Master Protein	Q96AE4	Far upstream element-binding protein 1 OS=Homo sapiens OX=9606 GN=FUBP1 PE=1 SV=3	0	252.308	57	30	2327	2	644	67.5	7.61	492.28	479.21	244.09	856.65	978.87	904.33	18	22	20	25	29	27	8880	FUBP1	hsa:8880; Q12828; Q96AE4	ENSG00000162613		0	29	8.12046e+08	1228730574	1160622472	1018404176	1178718497	1422979115	1250591035	1222339452	1232950067	8.39679e+08	9.79847e+08	7.88743e+08	1307565573	1359895738	1242707932	1320360649	1281975335	8.38959e+08
High	Master Protein	P48643	T-complex protein 1 subunit epsilon OS=Homo sapiens OX=9606 GN=CCT5 PE=1 SV=1	0	252.153	49	31	1349	31	541	59.6	5.66	159.56	198.4	41.67	352.98	379.31	439.21	23	22	14	29	29	28	22948	CCT5	A8JZY8; A8K2X8; B4DYD8; hsa:22948; P48643	ENSG00000150753	16p11.2 proximal deletion syndrome	7	0	8.80459e+08	1090317755	1052179207	1108168875	1197829637	1103513752	7.19723e+08	1322431242	1289927654	1013488571	1181943126	1102629494	1131945997	1140382946	1322794331	7.27614e+08	9.31216e+08	8.62784e+08
High	Master Protein	P36871	Phosphoglucomutase-1 OS=Homo sapiens OX=9606 GN=PGM1 PE=1 SV=3	0	252.128	50	33	2313	33	562	61.4	6.76	406.7	498.92	129.21	641.37	751.43	815.83	28	25	17	30	31	29	5236	PGM1	B2R5N9; B4DPV0; hsa:5236; P36871; Q16105; Q16106; Q5BKZ9; Q6NW22; Q86U74; Q96J40; Q9NTY4	ENSG00000079739	Ectoderm differentiation; Clear cell renal cell carcinoma pathways; Glycogen synthesis and degradation; Opioid receptor pathways; Disorders of galactose metabolism ; Disorders of fructose metabolism; Glucuronidation	12	0	1174373241	1510656969	1264202283	1640074788	1323154117	1209912238	1090446046	1465371329	1339838439	1527059318	1381211220	1378196956	1575976877	1543523644	1500480096	1188156619	1450607961	1071975411
High	Master Protein	P00738	Haptoglobin OS=Homo sapiens OX=9606 GN=HP PE=1 SV=1	0	251.426	51	30	2792	17	406	45.2	6.58	556.98	539.65	394.89	820.03	1567.85	367.74	24	19	22	23	29	20	3240	HP	B0AZL5; hsa:3240; P00737; P00738; Q0VAC4; Q0VAC5; Q2PP15; Q3B7J0; Q6LBY9; Q9UC67	ENSG00000257017	Network map of SARS-CoV-2 signaling pathway	3	14	2356571625	5.26779e+08	2565511458	1879044184	1325359895	5248127813	2580616841	2095973379	8489288768	6.76223e+08	2285857182	1294727661	3018214151	6068182006	2393100364	3254715701	4424909467	4004397662
High	Master Protein	Q14914	Prostaglandin reductase 1 OS=Homo sapiens OX=9606 GN=PTGR1 PE=1 SV=2	0	250.672	45	16	2809	16	329	35.8	8.29	660.71	607.93	183.4	791.02	873.03	1373.99	13	15	14	14	15	15	22949	PTGR1	A8K0N2; B4DPK3; F5GY50; hsa:22949; Q14914; Q8IYQ0; Q9H1X6	ENSG00000106853	Nuclear receptors meta-pathway; NRF2 pathway; Eicosanoid metabolism via cyclooxygenases (COX); Eicosanoid metabolism via lipooxygenases (LOX); Leukotriene metabolic pathway	7	0	9.76841e+08	1164795550	1594573190	2221041936	1508598742	1838890064	1295977570	1592801173	9.23125e+08	8.78126e+08	9.70324e+08	1094114233	1786815865	1069655047	7.98184e+08	8.51597e+08	1219918304	1260119599
High	Master Protein	P01833	Polymeric immunoglobulin receptor OS=Homo sapiens OX=9606 GN=PIGR PE=1 SV=4	0	250.644	41	32	1082	32	764	83.2	5.74	110.97	134.87	168.65	337.21	412.97	430.84	17	15	21	24	25	24	5284	PIGR	hsa:5284; P01833; Q68D81; Q8IZY7	ENSG00000162896		1	0	8.42872e+08	1356774425	3.36662e+08	2.34806e+08	2.88204e+08	4.201e+08	3.69745e+08	5.41765e+08	3.36263e+08	8.28184e+08	413500786	178781055	3.97992e+08	1616612221	8.37073e+08	3100957472	7.93989e+08	5.10461e+08
High	Master Protein	P09211	Glutathione S-transferase P OS=Homo sapiens OX=9606 GN=GSTP1 PE=1 SV=2	0	250.489	62	13	4043	13	210	23.3	5.64	883.43	1071.17	509.75	1781.69	2114	2168.09	13	13	13	13	13	13	2950	GSTP1	hsa:2950; O00460; P09211; Q15690; Q5TZY3	ENSG00000084207	Nuclear receptors meta-pathway; NRF2 pathway; Photodynamic therapy-induced NFE2L2 (NRF2) survival signaling; Exercise-induced circadian regulation; Arachidonate epoxygenase / epoxide hydrolase; Metapathway biotransformation Phase I and II	10	0	2982710874	2040895092	1040967066	4214919698	5.10003e+08	1553964606	1528678620	1411154154	2051038389	1399919269	2464193735	1797084414	1360643912	4150364906	3539539343	5040958203	2655394603	6754870594
High	Master Protein	P09417	Dihydropteridine reductase OS=Homo sapiens OX=9606 GN=QDPR PE=1 SV=2	0	250.436	59	14	3580	14	244	25.8	7.37	975.03	1188.79	284.01	1491.11	1502.61	2246.75	14	14	13	14	14	14	5860	QDPR	A8K158; B3KW71; hsa:5860; P09417; Q53F52; Q9H3M5	ENSG00000151552		1	0	2659700783	2017954684	4253744010	4343337548	2974749296	2014251039	2991346954	1947659158	2772184276	1619000790	3450250508	5066188450	2939853179	1609945487	2241156569	1635568270	2418531776	2066562013
High	Master Protein	Q9H4M9	EH domain-containing protein 1 OS=Homo sapiens OX=9606 GN=EHD1 PE=1 SV=2	0	249.987	58	27	1302	17	534	60.6	6.83	282.76	374.96	70.51	453.43	356.29	662.53	21	22	11	24	23	24	10938	EHD1	hsa:10938; O14611; Q2M3Q4; Q9H4M9; Q9UNR3	ENSG00000110047	Insulin signaling	2	12	5.54748e+08	5.63935e+08	5.36946e+08	1014592959	8.01393e+08	5.66155e+08	909735146	6.41098e+08	352675540	2.91383e+08	5.30769e+08	8.02258e+08	5.99525e+08	6.94153e+08	6.12644e+08	4.08913e+08	5.36422e+08	3.83444e+08
High	Master Protein	P53396	ATP-citrate synthase OS=Homo sapiens OX=9606 GN=ACLY PE=1 SV=3	0	249.904	40	37	1209	37	1101	120.8	7.33	179.83	213.48	27.49	419.57	413.64	516.17	22	21	15	31	31	32	47	ACLY	B4DIM0; B4E3P0; hsa:47; P53396; Q13037; Q9BRL0	ENSG00000131473	Sterol regulatory element-binding proteins (SREBP) signaling; TCA cycle and deficiency of pyruvate dehydrogenase complex (PDHc); Fatty acid biosynthesis; Amino acid metabolism; Lipid metabolism pathway; Clear cell renal cell carcinoma pathways; Metabolic reprogramming in colon cancer	10	0	4.47239e+08	6.81234e+08	6.3156e+08	1027377431	453682881	5.33662e+08	3.4171e+08	6.22543e+08	4.49072e+08	3.03432e+08	5.54219e+08	6.28679e+08	4.99476e+08	1499244826	8.59937e+08	6.44046e+08	7.24887e+08	1243393893
High	Master Protein	Q00796	Sorbitol dehydrogenase OS=Homo sapiens OX=9606 GN=SORD PE=1 SV=4	0	248.932	43	16	3254	16	357	38.3	7.97	812.72	958.18	274.76	1123.83	1360.29	1761.55	15	13	13	14	15	16	6652	SORD	B2R655; B7Z3A6; hsa:6652; J3JZZ5; Q00796; Q16682; Q9UMD6	ENSG00000140263	Disorders of fructose metabolism; Polyol pathway	4	0	1760336736	1358207133	1933485124	3044589945	1730557423	1414133057	1712401174	2294292622	2145955605	1110552877	1777054270	2382936838	1431870086	1150762634	1596608755	7.30909e+08	8.46006e+08	916859206
High	Master Protein	P01857	Immunoglobulin heavy constant gamma 1 OS=Homo sapiens OX=9606 GN=IGHG1 PE=1 SV=1	0	247.698	71	21	13337	8	330	36.1	8.19	3951.06	4390.69	2245.33	5801.27	4395.87	2696.86	20	19	18	20	18	15						0	14	23209166361	33355528726	13691840323	11226370412	10357480542	25957192260	14203796292	12084832278	11762391984	8269280655	13575959231	8920025388	19672608245	64134373879	15913927807	25889305453	24054339794	51783185791
High	Master Protein	P09960	Leukotriene A-4 hydrolase OS=Homo sapiens OX=9606 GN=LTA4H PE=1 SV=2	0	247.501	48	27	1055	27	611	69.2	6.18	141.15	287.8	58.06	384.3	314.17	484.99	22	22	16	24	21	27	4048	LTA4H	B4DNQ9; F8VV40; hsa:4048; P09960; Q6IAT6; Q9UCT7	ENSG00000111144	Eicosanoid metabolism via lipooxygenases (LOX); Prostaglandin and leukotriene metabolism in senescence ; Leukotriene metabolic pathway; Prostaglandin and leukotriene metabolism in senescence	11	0	3.16699e+08	4.51692e+08	3.22385e+08	6.40265e+08	5.51951e+08	5.49464e+08	3.83674e+08	5.6829e+08	5.45973e+08	3.85699e+08	4.64218e+08	3.96608e+08	3.75654e+08	6.34249e+08	482993064	4.65314e+08	5.16901e+08	8.25332e+08
High	Master Protein	Q15582	Transforming growth factor-beta-induced protein ig-h3 OS=Homo sapiens OX=9606 GN=TGFBI PE=1 SV=1	0	246.956	33	24	2516	24	683	74.6	7.71	411.76	606.32	223.81	1021.51	741.79	690.09	21	22	21	24	23	24	7045	TGFBI	D3DQB1; hsa:7045; O14471; O14472; O14476; O43216; O43217; O43218; O43219; Q15582; Q53XM1	ENSG00000120708		1	0	1463533646	1214605739	1123555950	1438546079	2.66616e+08	800893530	1346353110	1344656132	1268902599	701106304	840038580	9.49374e+08	1680329407	1305834229	1529544289	2193089312	2303399623	1673491173
High	Master Protein	Q6YN16	Hydroxysteroid dehydrogenase-like protein 2 OS=Homo sapiens OX=9606 GN=HSDL2 PE=1 SV=1	0	246.643	65	24	1660	24	418	45.4	7.99	296.5	379.44	163.13	612.16	547.72	800.9	21	20	16	20	20	24	84263	HSDL2	A8K1L4; A8K8X1; A8MSV3; hsa:84263; Q658M8; Q6YN16; Q9BT58	ENSG00000119471		0	0	8.99682e+08	8.1793e+08	1429203767	1342365802	1315896744	8.37951e+08	1401011480	9.57963e+08	1127974258	1494145870	1093926405	1825608265	1193448860	6.51259e+08	1214564864	6.68332e+08	741209830	5.9752e+08
High	Master Protein	O60506	Heterogeneous nuclear ribonucleoprotein Q OS=Homo sapiens OX=9606 GN=SYNCRIP PE=1 SV=2	0	246.509	40	27	2060	22	623	69.6	8.59	331.7	400.57	146.4	700.03	774.48	696.54	20	18	17	23	27	25	10492	SYNCRIP	E1P501; E1P502; hsa:10492; O60506; Q53H05; Q5TCG2; Q5TCG3; Q8IW78; Q8N599; Q96LC1; Q96LC2; Q9Y583	ENSG00000135316		0	5	1034966469	1146654255	7.53856e+08	1595843059	6.55924e+08	1224461666	1266123870	1043409850	1799101460	6.80985e+08	1119464881	1082139711	1401315068	1240396921	1419603517	1219832808	1359286558	1928569319
High	Master Protein	Q9Y4G6	Talin-2 OS=Homo sapiens OX=9606 GN=TLN2 PE=1 SV=4	0	246.189	21	46	1627	31	2542	271.4	5.57	376.92	428.59	107.59	602.12	518.64	520.31	31	31	12	34	35	31	83660	TLN2	A6NLB8; hsa:83660; Q9Y4G6	ENSG00000171914	Focal adhesion	1	0	185030396	1.57525e+08	8.47076e+07	197496437	2.25331e+08	2.26876e+08	2.63256e+08	193404442	3.27809e+08	1.23245e+08	1.19376e+08	1.58733e+08	1.60355e+08	1.83739e+08	1.81967e+08	1.26588e+08	165571408	2.61177e+08
High	Master Protein	Q12906	Interleukin enhancer-binding factor 3 OS=Homo sapiens OX=9606 GN=ILF3 PE=1 SV=3	0	245.718	35	29	2262	28	894	95.3	8.76	451.19	458.62	116.53	781.96	713.21	811.14	25	23	17	27	27	27	3609	ILF3	A8K6F2; G5E9M5; hsa:3609; O43409; Q12906; Q6P1X1; Q86XY7; Q99544; Q99545; Q9BZH4; Q9BZH5; Q9NQ95; Q9NQ96; Q9NQ97; Q9NQ98; Q9NQ99; Q9NQA0; Q9NQA1; Q9NQA2; Q9NRN2; Q9NRN3; Q9NRN4; Q9UMZ9; Q9UN00; Q9UN84; Q9UNA2	ENSG00000129351		0	1	1264513603	1556070393	1173867204	1477042113	9.41605e+08	1189922227	1506412756	1573066831	1484903461	1043006269	1326119969	1318719590	1564421967	1840746480	1893371747	1700508521	1772464645	8.82806e+08
High	Master Protein	Q6PCB0	von Willebrand factor A domain-containing protein 1 OS=Homo sapiens OX=9606 GN=VWA1 PE=1 SV=1	0	245.548	55	15	1412	15	445	46.8	7.68	338.75	482.45	149.77	596.1	559.97	628.18	13	13	14	13	13	14	64856	VWA1	A8K692; B3KUA1; E9PB53; hsa:64856; Q6PCB0; Q7L5D7; Q9H6J5	ENSG00000179403	1p36 copy number variation syndrome	3	0	4.69355e+08	3.60365e+08	3.60323e+08	4.01076e+08	1.48712e+08	3.25111e+08	5.05625e+08	2.78975e+08	3.45836e+08	1.45467e+08	3.31923e+08	4.1477e+08	4.83175e+08	4.30701e+08	4.91606e+08	3.74217e+08	4.41529e+08	2.88876e+08
High	Master Protein	P14314	Glucosidase 2 subunit beta OS=Homo sapiens OX=9606 GN=PRKCSH PE=1 SV=2	0	245.398	36	26	3414	26	528	59.4	4.41	686.01	779.42	326.37	1154.01	1201.01	1344.31	23	24	23	23	26	25	5589	PRKCSH	A8K318; hsa:5589; P14314; Q96BU9; Q96D06; Q9P0W9	ENSG00000130175		7	0	3079313244	3559219708	3059899422	2992808883	2859582779	2822378200	3206317794	2789892834	2188918463	2393526217	3800606578	2351060494	2399533233	3409807317	3373754501	3503350034	3120141358	1988489382
High	Master Protein	Q16762	Thiosulfate sulfurtransferase OS=Homo sapiens OX=9606 GN=TST PE=1 SV=4	0	245.303	72	21	2750	20	297	33.4	7.25	700.6	836.24	241.48	1007.69	848.01	1410.04	18	18	13	18	17	20	7263	TST	B3KRM1; hsa:7263; Q16762; Q6IB06	ENSG00000128311		2	1	1665091978	8.43372e+08	1907182511	2920139708	8.32536e+08	8.86091e+08	1937580499	1453528652	1998377473	9.54306e+08	1561136044	2966131115	1767217023	9.35316e+08	1634949943	7.33059e+08	9.87444e+08	7.77451e+08
High	Master Protein	Q13263	Transcription intermediary factor 1-beta OS=Homo sapiens OX=9606 GN=TRIM28 PE=1 SV=5	0	245.263	44	28	1348	28	835	88.5	5.77	286.13	291.9	108.09	613.12	630.24	568.59	22	20	17	22	27	23	10155	TRIM28	hsa:10155; O00677; Q13263; Q7Z632; Q93040; Q96IM1	ENSG00000130726	Corticotropin-releasing hormone signaling pathway; Mesodermal commitment pathway; ATM signaling in development and disease	6	0	5.81239e+08	7.98701e+08	3.76907e+08	1027469968	4.71012e+08	8.12677e+08	7.73491e+08	537054593	9.63572e+08	7.39366e+08	1137782358	8.42941e+08	9.99878e+08	1072337421	1365239318	1700507071	1017776727	2210639300
High	Master Protein	Q9UJZ1	Stomatin-like protein 2, mitochondrial OS=Homo sapiens OX=9606 GN=STOML2 PE=1 SV=1	0	245.258	55	24	1396	24	356	38.5	7.39	307.3	380.34	128.94	561.26	514.73	799.47	16	16	13	20	18	22	30968	STOML2	B4E1K7; D3DRN3; hsa:30968; O60376; Q53G29; Q96FY2; Q9P042; Q9UJZ1	ENSG00000165283		1	0	7.55615e+08	4.77818e+08	1039976748	7.61617e+08	8.91217e+08	3.23846e+08	8.23887e+08	6.7359e+08	2.99517e+08	4.77881e+08	8.77088e+08	614441161	5.91043e+08	5.0214e+08	7.74727e+08	3.39064e+08	4.45896e+08	6.21757e+08
High	Master Protein	P13796	Plastin-2 OS=Homo sapiens OX=9606 GN=LCP1 PE=1 SV=6	0	244.94	48	27	1952	23	627	70.2	5.43	306.21	478.64	188.11	1173.12	797.8	527.25	18	21	18	26	22	22	3936	LCP1	B2R613; B4DUA0; hsa:3936; P13796; Q5TBN4	ENSG00000136167		1	0	4.88648e+08	1132592028	2.89081e+08	6.0758e+08	1.86976e+08	6.93184e+08	1089099267	9.32561e+08	1129177218	4.18529e+08	4.35148e+08	2.80359e+08	7.19713e+08	3221006412	9.15691e+08	2674948006	1367374067	1243802924
High	Master Protein	P13797	Plastin-3 OS=Homo sapiens OX=9606 GN=PLS3 PE=1 SV=4	0	244.706	43	28	2280	22	630	70.8	5.6	593.34	700.97	183.53	1112.41	845.77	1004.88	23	23	16	24	25	27	5358	PLS3	A8K579; B1AQ09; B4DGB4; B7Z6M1; hsa:5358; P13797; Q86YI6	ENSG00000102024		0	7	9.24649e+08	1252464716	6.91026e+08	1573891442	1238423024	8.85631e+08	6.542e+08	1120834762	6.09695e+08	714227412	1206479608	1370895020	8.64366e+08	1951201944	1392106795	2068587968	1675584435	1009000980
High	Master Protein	P34931	Heat shock 70 kDa protein 1-like OS=Homo sapiens OX=9606 GN=HSPA1L PE=1 SV=2	0	244.113	36	24	6382	3	641	70.3	6.02	1620.74	1807.01	661.53	3105.98	2620.9	2888.33	21	20	19	23	20	24	3305	HSPA1L	A6NNB0; B0UXW8; hsa:3305; O75634; P34931; Q2HXR3; Q8NE72; Q96QC9; Q9UQM1	ENSG00000204390; ENSG00000206383; ENSG00000234258; ENSG00000236251	Parkin-ubiquitin proteasomal system pathway; MAPK signaling pathway; Measles virus infection	7	0	1.79997e+07	3.69184e+07	1.04058e+07	2.07247e+07	4.64901e+07	2.5838e+07	1.25732e+07	4.13545e+07	2.40973e+06	4.88276e+06	3.46995e+07	2.06882e+07	2.35804e+07	8.25304e+06	4.05151e+07	4.05873e+06	2.20875e+07	7.97597e+06
High	Master Protein	P00338	L-lactate dehydrogenase A chain OS=Homo sapiens OX=9606 GN=LDHA PE=1 SV=2	0	244.07	55	26	3760	23	332	36.7	8.27	737.26	650.33	231.24	1127.51	1208.93	1482.06	23	21	18	25	24	24	3939	LDHA	B4DKQ2; B7Z5E3; D3DQY3; F8W819; hsa:3939; P00338; Q53G53; Q6IBM7; Q6ZNV1; Q9UDE8; Q9UDE9	ENSG00000134333; ENSG00000288299	Cori cycle; HIF1A and PPARG regulation of glycolysis; Photodynamic therapy-induced HIF-1 survival signaling; VEGFA-VEGFR2 signaling; Amino acid metabolism; Clear cell renal cell carcinoma pathways; PI3K/AKT/mTOR - vitamin D3 signaling; Metabolic reprogramming in colon cancer; Aerobic glycolysis; Glycolysis in senescence; Orexin receptor pathway; CCL18 signaling pathway; Glucose metabolism in trip…	17	0	1788177219	4055622548	1668385255	1957953320	1636283547	2130164822	1899583857	2287709109	3724228901	1915493974	1500612829	1624293425	2375823483	4378935853	3292201224	3199346972	2145925780	2374270784
High	Master Protein	Q9Y696	Chloride intracellular channel protein 4 OS=Homo sapiens OX=9606 GN=CLIC4 PE=1 SV=4	0	243.607	79	20	3097	19	253	28.8	5.59	723.61	926.51	262.09	1188.87	1212.21	1503.83	18	16	9	14	19	20	25932	CLIC4	hsa:25932; Q9UFW9; Q9UQJ6; Q9Y696	ENSG00000169504		0	1	2033281981	1686406543	2929440128	2545079943	2241855498	1663862033	2778680062	2917910220	2671302397	2443496034	2082196615	2329756863	1804053371	1289886014	1983490026	1169219144	1381023806	1459687636
High	Master Protein	Q9BUF5	Tubulin beta-6 chain OS=Homo sapiens OX=9606 GN=TUBB6 PE=1 SV=1	0	243.395	47	20	7438	8	446	49.8	4.88	1783.11	2039.22	670.62	2843.87	2923.78	3412.97	15	17	14	17	19	17	84617	TUBB6	B3KM76; hsa:84617; Q9BUF5; Q9HA42	ENSG00000176014	Alzheimer's disease and miRNA effects; Pathogenic Escherichia coli infection; Parkin-ubiquitin proteasomal system pathway; Alzheimer's disease	34	0	1.19932e+08	1.29941e+08	3.66415e+07	2.88443e+08	5.58676e+07	8.06751e+07	1.86336e+08	7.33421e+07	7.10203e+07	8.97953e+06	8.9025e+07	1.57181e+08	1.22567e+08	1.66567e+08	1.63538e+08	1.39189e+08	1.6404e+08	3.58555e+08
High	Master Protein	P35237	Serpin B6 OS=Homo sapiens OX=9606 GN=SERPINB6 PE=1 SV=3	0	242.608	51	18	1925	17	376	42.6	5.27	372.39	532.21	137.71	760.73	724.14	723.03	15	15	14	17	15	17	5269	SERPINB6	B2RBA8; hsa:5269; P35237; Q59F97; Q5TD06; Q7Z2Y7; Q96J44; Q9UDI7	ENSG00000124570	Ectoderm differentiation	3	1	1005210471	8.97594e+08	9.14149e+08	1962231637	1129159829	6.79184e+08	7.82866e+08	1032999087	5.39841e+08	6.85866e+08	1359625675	1856893776	1069107861	1099605567	1154739824	8.9544e+08	1338448110	8.56043e+08
High	Master Protein	P10909	Clusterin OS=Homo sapiens OX=9606 GN=CLU PE=1 SV=1	0	242.307	46	28	3131	28	449	52.5	6.27	634.1	895.49	396.12	1129.39	1141.95	1023.79	21	19	20	23	25	21	1191	CLU	B2R9Q1; B3KSE6; hsa:1191; P10909; P11380; P11381; Q2TU75; Q5HYC1; Q7Z5B9	ENSG00000120885	Male infertility; Complement system in neuronal development and plasticity; Complement and coagulation cascades	7	0	3161306059	2580797963	3822152487	1635870847	1396025632	1689177888	1928578184	1798575149	8.75429e+08	1278698525	1743661322	1773647731	1955276262	1869284623	1416556173	3281496901	3646013158	1971888204
High	Master Protein	P11216	Glycogen phosphorylase, brain form OS=Homo sapiens OX=9606 GN=PYGB PE=1 SV=5	0	241.756	37	32	1333	26	843	96.6	6.86	280.06	265.61	56.38	432.22	498.75	529.68	22	23	14	25	31	28	5834	PYGB	hsa:5834; P11216; Q96AK1; Q9NPX8	ENSG00000100994	IL-18 signaling pathway; Glycogen synthesis and degradation	4	6	616534154	1180280738	5.02085e+08	7.63159e+08	6.45831e+08	5.16487e+08	6.40422e+08	4.66265e+08	7.01922e+08	7.70056e+08	6.90123e+08	619442305	4.88958e+08	1039219812	8.31613e+08	1107124278	8.48798e+08	6.77953e+08
High	Master Protein	P61981	14-3-3 protein gamma OS=Homo sapiens OX=9606 GN=YWHAG PE=1 SV=2	0	241.404	65	23	5339	15	247	28.3	4.89	781.13	900.02	396.2	1519.01	1501.71	1593.64	20	18	17	20	20	19	7532	YWHAG	hsa:7532; O70457; P35214; P61981; Q6FH52; Q9UDP2; Q9UN99	ENSG00000170027	Cell cycle; Prolactin signaling pathway; Myometrial relaxation and contraction pathways; Disruption of postsynaptic signaling by CNV; Calcium regulation in cardiac cells; Sudden infant death syndrome (SIDS) susceptibility pathways	21	6	2185380926	3175088051	2626471531	2852365378	4930388206	4485348499	2962401302	2989076619	3038134330	1523863179	3071595611	3637539389	4744871573	2934274120	2670174127	2324160154	3698226143	1309022536
High	Master Protein	Q9NVA2	Septin-11 OS=Homo sapiens OX=9606 GN=SEPTIN11 PE=1 SV=3	0	241.025	42	24	3208	12	429	49.4	6.81	681.47	755.67	292.26	1276.02	1197.33	1188.39	22	20	18	23	23	23	55752	SEPTIN11	B7Z7Z6; E9KL32; hsa:55752; Q4W5G1; Q7L4N1; Q96SP1; Q9NVA2; Q9UFY9	ENSG00000138758	22q11.2 copy number variation syndrome	1	14	1392624683	1698384383	1444048268	1528232840	1230968035	1807919766	1325973876	1735093279	9.04963e+08	9.68562e+08	1387644078	1511260609	1816430994	1594269225	1887133419	2032626551	1952391996	1013557320
High	Master Protein	Q9H0W9	Ester hydrolase C11orf54 OS=Homo sapiens OX=9606 GN=C11orf54 PE=1 SV=1	0	240.132	54	20	4680	20	315	35.1	6.7	717.06	878.19	278.89	1344.41	1323.64	2186.1	17	16	15	19	16	19	28970	C11orf54	A8K850; hsa:28970; Q6FI88; Q6XYB0; Q96EI3; Q96IX1; Q9H0W9; Q9Y6B4	ENSG00000182919		0	0	1670421991	1401310506	3571005334	5928614960	1513571888	1614003285	2601531943	1963549341	3478733886	1271215174	1888569050	2530016879	2206851797	736973319	1862108273	7.02646e+08	1141648618	2685308455
High	Master Protein	P62805	Histone H4 OS=Homo sapiens OX=9606 GN=H4C1 PE=1 SV=2	0	239.711	59	16	8849	16	103	11.4	11.36	2142.09	2394.65	980.86	3998.83	3286.31	3704.82	15	14	14	16	16	15	121504; 554313; 8294; 8359; 8360; 8361; 8362; 8363; 8364; 8365; 8366; 8367; 8368; 8370	H4C1; H4C11; H4C12; H4C13; H4C14; H4C15; H4C16; H4C2; H4C3; H4C4; H4C5; H4C6; H4C8; H4C9	A2VCL0; hsa:121504; hsa:554313; hsa:8294; hsa:8359; hsa:8360; hsa:8361; hsa:8362; hsa:8363; hsa:8364; hsa:8365; hsa:8366; hsa:8367; hsa:8368; hsa:8370; P02304; P02305; P62805; Q6DRA9; Q6FGB8; Q6NWP7	ENSG00000158406; ENSG00000197061; ENSG00000197238; ENSG00000197837; ENSG00000270276; ENSG00000270882; ENSG00000273542; ENSG00000274618; ENSG00000275126; ENSG00000276180; ENSG00000276966; ENSG00000277157; ENSG00000278637; ENSG00000278705	Gastric cancer network 1; Histone modifications; 22q11.2 copy number variation syndrome; Male infertility; 11p11.2 copy number variation syndrome ; Type II interferon signaling	51	0	10811555172	8633934602	8086937715	11804888520	2109311190	3319279965	10914593854	6994715058	13970752019	14989884196	4751092584	7664050547	10627241160	13440802270	13256066717	14365049626	13711475890	26392700786
High	Master Protein	O95202	Mitochondrial proton/calcium exchanger protein OS=Homo sapiens OX=9606 GN=LETM1 PE=1 SV=1	0	239.124	42	29	1697	29	739	83.3	6.7	403.82	459.24	80.94	691.73	503.14	855.61	22	23	16	24	25	26	3954	LETM1	B4DED2; hsa:3954; O95202; Q9UF65	ENSG00000168924		2	0	5.05386e+08	5.67361e+08	561673733	8.14645e+08	1206460503	1129066906	1133468173	1080658055	1612469666	9.45453e+08	9.34394e+08	618587355	7.1297e+08	712474991	736116741	3.42464e+08	4.48283e+08	1053060410
High	Master Protein	Q9NQT8	Kinesin-like protein KIF13B OS=Homo sapiens OX=9606 GN=KIF13B PE=1 SV=2	0	239.038	25	35	716	34	1826	202.7	5.88	120.53	122.94	31.01	263.17	260.82	328.8	20	18	9	24	26	30	23303	KIF13B	B4DGY5; B5MC45; F8VPJ2; hsa:23303; O75134; Q9BYJ6; Q9NQT8	ENSG00000197892		2	1	773287415	1042501674	4.33739e+08	1118239160	8.47381e+08	7.44106e+08	1219071723	9.54475e+08	1096915416	3.62114e+08	1029305280	6.31595e+08	7.87662e+08	1231326741	9.739e+08	1333668641	7.52602e+08	1093681458
High	Master Protein	P00491	Purine nucleoside phosphorylase OS=Homo sapiens OX=9606 GN=PNP PE=1 SV=2	0	238.287	59	18	3551	17	289	32.1	6.95	770.75	1023.77	291.8	1221.99	1390.68	1884.76	15	14	13	15	18	17	4860	PNP	B2R8S5; D3DS00; hsa:4860; P00491; Q15160; Q5PZ03	ENSG00000198805	VEGFA-VEGFR2 signaling	6	1	1311724894	1016581905	1418253150	2152125545	1212602325	7.90873e+08	1589742237	1034556267	9.02405e+08	1067362050	1665993548	1543551335	1001119677	9.83399e+08	1445847624	6.67449e+08	9.42779e+08	1359508307
High	Master Protein	P48637	Glutathione synthetase OS=Homo sapiens OX=9606 GN=GSS PE=1 SV=1	0	238.051	61	28	1390	28	474	52.4	5.92	249.7	332.56	95.79	532.17	484.14	532.06	20	21	17	25	23	23	2937	GSS	B2R697; B6F210; E1P5P9; hsa:2937; P48637; Q4TTD9	ENSG00000100983	Glutathione metabolism; Trans-sulfuration, one-carbon metabolism and related pathways; Amino acid metabolism; Ferroptosis; Metapathway biotransformation Phase I and II	7	0	1231661140	1625831964	1079072128	1135439013	1601923961	1429407248	1479087955	1502835849	1145120471	1412482760	1546332849	1372927239	1612363207	1477825572	1440771552	9.06963e+08	1339047017	1131119185
High	Master Protein	P00325	All-trans-retinol dehydrogenase [NAD(+)] ADH1B OS=Homo sapiens OX=9606 GN=ADH1B PE=1 SV=3	0	237.63	47	22	2265	11	375	39.8	8.19	464.35	660.79	224.8	716.32	701.3	757.77	17	18	14	18	22	19	125	ADH1B	A8MYN5; B4DRS9; B4DVC3; hsa:125; P00325; Q13711; Q4ZGI9; Q96KI7	ENSG00000196616	Fatty acid omega-oxidation; Ethanol effects on histone modifications	3	12	2027366516	1885364957	1274140550	3338192763	1090815293	1044740941	9.68369e+08	1985963583	7.42175e+08	1405263943	1470437191	2349813520	1325724038	2217812805	1953967880	3288935645	2863691455	1244438984
High	Master Protein	P21980	Protein-glutamine gamma-glutamyltransferase 2 OS=Homo sapiens OX=9606 GN=TGM2 PE=1 SV=2	0	237.294	38	27	1777	27	687	77.3	5.22	277.09	249.66	73.48	733.66	721.49	432.77	20	19	13	24	24	21	7052	TGM2	E1P5V9; hsa:7052; P21980; Q16436; Q6B838; Q9BTN7; Q9H035; Q9UH35	ENSG00000198959	IL-18 signaling pathway	1	0	662401033	1428306749	4.25491e+08	4.78636e+08	3.83355e+08	6.55984e+08	7.79729e+08	9.16253e+08	7.70737e+08	6.94522e+08	6.53076e+08	5.32797e+08	917297624	1758500904	1384564427	1946392466	1068936334	1105854863
High	Master Protein	Q9H6R3	Acyl-CoA synthetase short-chain family member 3, mitochondrial OS=Homo sapiens OX=9606 GN=ACSS3 PE=1 SV=1	0	237.265	36	23	1506	23	686	74.7	8.63	289.08	469.66	99.37	439.11	446.87	678.91	19	21	18	22	20	21	79611	ACSS3	hsa:79611; Q8NC66; Q9H6R3	ENSG00000111058		1	0	1531295906	1527809960	2276363182	1842428257	2238087381	2811248595	1362369225	2305505258	3937542633	2187859486	2338615777	2454213370	2147879887	1448594891	1518368050	8.61319e+08	1354974087	8.60248e+08
High	Master Protein	P51884	Lumican OS=Homo sapiens OX=9606 GN=LUM PE=1 SV=2	0	236.646	46	23	7512	23	338	38.4	6.61	1493.86	1564.94	672.66	2391.98	2097.75	2266.87	16	16	14	20	19	20	4060	LUM	B2R6R5; hsa:4060; P51884; Q96QM7	ENSG00000139329		7	0	8729064717	7146868087	9544066933	8990411738	3930976246	7238055297	5135180240	7267173640	5505041171	3465048888	8503034736	5295236400	4853828814	4317973493	6741003386	11945269469	7588797288	5138157946
High	Master Protein	P99999	Cytochrome c OS=Homo sapiens OX=9606 GN=CYCS PE=1 SV=2	0	236.204	70	19	4511	19	105	11.7	9.57	967.58	997.73	368.97	1471.5	1514.1	1707.65	18	18	17	19	18	18	54205	CYCS	A4D166; B2R4I1; hsa:54205; P00001; P99999; Q6NUR2; Q6NX69; Q96BV4	ENSG00000172115	miRNA regulation of DNA damage response; Apoptosis modulation and signaling; Alzheimer's disease and miRNA effects; AGE/RAGE pathway; Parkinson's disease pathway; Nanomaterial induced apoptosis; Apoptosis; Fas ligand pathway and stress induction of heat shock proteins; Apoptosis modulation by HSP70; VEGFA-VEGFR2 signaling; Oxidative damage response; NO/cGMP/PKG mediated neuroprotection; Chromosom…	36	0	2803836962	2198894018	5719835089	4511375144	3722272675	3390072532	3957757899	3846773482	3463355110	1430576232	2876739729	3087708951	3433309698	2538855478	3508210323	1195066288	2364737147	2243514814
High	Master Protein	Q15067-2	Isoform 2 of Peroxisomal acyl-coenzyme A oxidase 1 OS=Homo sapiens OX=9606 GN=ACOX1	0	235.435	45	22	689	2	660	74.6	7.62	74.72	119.3	37.93	204.75	139.51	317.14	13	15	12	21	17	20		ACOX1	Q15067-2			0	0				5.3109e+06								3.72877e+06	420209
High	Master Protein	P51570	Galactokinase OS=Homo sapiens OX=9606 GN=GALK1 PE=1 SV=1	0	235.237	40	21	1695	21	392	42.2	6.46	362.21	431.16	100.24	549.79	523.51	902.86	19	19	15	18	21	21	2584	GALK1	B2RC07; B4E1G6; P51570	ENSG00000108479	Disorders of galactose metabolism	3	0	8.19959e+08	5.70655e+08	5.81141e+08	9.7756e+08	7.52427e+08	4.04905e+08	9.21592e+08	5.61146e+08	6.10909e+08	3.02372e+08	7.11186e+08	9.5572e+08	6.54586e+08	5.32426e+08	585126892	5.84405e+08	6.18881e+08	9.5754e+08
High	Master Protein	O75947	ATP synthase subunit d, mitochondrial OS=Homo sapiens OX=9606 GN=ATP5PD PE=1 SV=3	0	235.085	91	22	2981	22	161	18.5	5.3	348.48	515.37	216.5	794.93	659.45	1018.77	17	17	16	19	21	21	10476	ATP5PD	B2R5L6; hsa:10476; O75947; Q9H3J4	ENSG00000167863	Electron transport chain: OXPHOS system in mitochondria; Oxidative phosphorylation	4	0	3400369518	3359547644	5239988509	3949798073	3659899362	2227894834	3472849803	2858145315	2913704413	2890654679	3849427630	3110460856	3147257812	3053081310	3611777976	4343039776	1987842860	3943251054
High	Master Protein	P51687	Sulfite oxidase, mitochondrial OS=Homo sapiens OX=9606 GN=SUOX PE=1 SV=2	0	235.065	48	21	1812	21	545	60.2	6.11	426.16	539.43	167.31	731.02	635.76	1036.91	18	18	15	19	19	19	6821	SUOX	hsa:6821; P51687	ENSG00000139531		1	0	8.18006e+08	4.15755e+08	1050901813	1032630250	7.80503e+08	7.18549e+08	9.39188e+08	6.38506e+08	1028322286	7.88744e+08	8.67185e+08	9.54098e+08	6.13071e+08	4.78799e+08	8.31963e+08	3.44433e+08	5.24038e+08	5.47994e+08
High	Master Protein	P35232	Prohibitin 1 OS=Homo sapiens OX=9606 GN=PHB1 PE=1 SV=1	0	234.729	77	24	2636	24	272	29.8	5.76	524.83	591.34	254.06	1177.16	906.53	1216.81	20	20	18	23	22	22	5245	PHB1	B4DY47; hsa:5245; P35232; Q4VBQ0	ENSG00000167085		5	0	1314502115	1036081822	1718421671	1832386080	1463191105	9.81548e+08	1639126431	1658044019	1697858815	8.42804e+08	1483231844	1836119835	1798401573	1301848498	1647400565	7.97938e+08	1093404629	2937183960
High	Master Protein	P14317	Hematopoietic lineage cell-specific protein OS=Homo sapiens OX=9606 GN=HCLS1 PE=1 SV=3	0	234.632	44	27	944	27	486	54	4.81	77.53	168.58	137.74	583.89	493.39	193.09	15	13	16	24	25	16	3059	HCLS1	B4DQ69; hsa:3059; P14317; Q53Y93; Q6IBK9; Q9UDK0	ENSG00000180353	Pathogenic Escherichia coli infection; B cell receptor signaling pathway; TYROBP causal network in microglia	3	0	4.34562e+08	5.80643e+08	3.85603e+08	3.40307e+08	207165472	5.82012e+08	3.92453e+08	811622661	1269146918	4.41264e+08	4.35657e+08	1.97217e+08	5.64846e+08	1133508948	5.84939e+08	1709934568	7.0687e+08	3.26158e+08
High	Master Protein	P14866	Heterogeneous nuclear ribonucleoprotein L OS=Homo sapiens OX=9606 GN=HNRNPL PE=1 SV=2	0	233.729	51	24	1752	24	589	64.1	8.22	289.48	316.56	133.98	507.16	645.07	741.99	20	18	12	20	21	23	3191	HNRNPL	A6ND69; A6NIT8; hsa:3191; P14866; Q9H3P3	ENSG00000104824; ENSG00000282947	mRNA processing; Hippocampal synaptogenesis and neurogenesis; 11p11.2 copy number variation syndrome	5	0	9.09629e+08	7.50681e+08	1133910593	1314449113	6.493e+08	660868952	1262387596	1095976898	1018361405	4.80847e+08	6.91129e+08	5.99635e+08	8.07626e+08	7.72247e+08	1076288412	6.53793e+08	8.83828e+08	7.99964e+08
High	Master Protein	Q9Y2D5-6	Isoform 4 of A-kinase anchor protein 2 OS=Homo sapiens OX=9606 GN=AKAP2	0	233.396	29	28	1160	26	1090	120.6	5.05	204.24	198.52	81.25	283.87	382.49	386.1	22	24	21	25	24	26		AKAP2	Q9Y2D5-6			0	2	7.787e+08	1116015105	5.5486e+08	8.48626e+08	3246812807	1558609670	1691852994	9.49883e+08	8.18383e+08	5.56996e+08	1840906009	1073198221	8.80059e+08	1070169028	1014224701	1122732333	1743990752	9.72484e+08
High	Master Protein	P22033	Methylmalonyl-CoA mutase, mitochondrial OS=Homo sapiens OX=9606 GN=MMUT PE=1 SV=4	0	232.058	43	26	1510	26	750	83.1	6.93	240.17	384.77	98.14	458.04	452.68	754.84	21	19	13	21	22	25	4594	MMUT	A8K953; hsa:4594; P22033; Q5SYZ3; Q96B11; Q9UD64	ENSG00000146085	Vitamin B12 metabolism; Amino acid metabolism	6	0	7.489e+08	558032238	4.53136e+08	1107868226	1191621240	3.71924e+08	1153061777	9.77909e+08	1.01513e+08	4.63045e+08	922169838	1091732294	5.848e+08	6.55392e+08	8.79304e+08	3.45627e+08	4.58197e+08	8.83607e+08
High	Master Protein	P49588	Alanine--tRNA ligase, cytoplasmic OS=Homo sapiens OX=9606 GN=AARS1 PE=1 SV=2	0	231.773	39	35	753	35	968	106.7	5.53	149.74	155.92	27.49	238.72	213.28	323.29	24	24	15	26	25	28	16	AARS1	A6NF14; B4DR45; hsa:16; P49588; Q53GV7; Q96FA0	ENSG00000090861	IL-18 signaling pathway	2	0	4.36809e+08	663771903	3.95982e+08	5.03309e+08	5.38642e+08	5.5293e+08	4.21273e+08	5.92409e+08	3.47293e+08	6.1629e+08	5.08906e+08	4.89745e+08	525960885	6.37276e+08	5.51494e+08	4.68283e+08	5.19102e+08	5.61854e+08
High	Master Protein	Q8WWI1-3	Isoform 3 of LIM domain only protein 7 OS=Homo sapiens OX=9606 GN=LMO7	0	231.151	30	34	1190	34	1349	153.6	7.75	269.99	274.64	78.22	427.33	461.46	615.68	22	24	20	27	29	30		LMO7	Q8WWI1-3			0	0	5.06827e+08	6.91302e+08	7.70713e+08	9.38693e+08	1846895571	1619651657	1123784729	7.871e+08	1620262535	6.01011e+08	8.37717e+08	1448121370	1930895754	1015181707	6.20407e+08	4.0671e+08	5.32331e+08	4.37352e+08
High	Master Protein	Q14152	Eukaryotic translation initiation factor 3 subunit A OS=Homo sapiens OX=9606 GN=EIF3A PE=1 SV=1	0	229.724	39	47	963	47	1382	166.5	6.79	146.71	145.94	40.95	264.46	238.14	289.15	30	30	15	35	37	35	8661	EIF3A	B1AMV5; B4DYS1; F5H335; hsa:8661; O00653; Q14152; Q15778	ENSG00000107581	Translation factors; nsp1 from SARS-CoV-2 inhibits translation initiation in the host cell	8	0	3.40499e+08	5.56298e+08	4.67294e+08	5.43388e+08	3.26092e+08	1045229815	6.10621e+08	8.20275e+08	8.9447e+08	4.67014e+08	4.5716e+08	449839077	534754686	6.4506e+08	538001761	4.57704e+08	4.98889e+08	4.54805e+08
High	Master Protein	P02792	Ferritin light chain OS=Homo sapiens OX=9606 GN=FTL PE=1 SV=2	0	229.229	62	12	2110	12	175	20	5.78	462.76	523.83	237.54	797.12	939.9	818.39	11	11	11	11	11	11	2512	FTL	B2R4B9; hsa:2512; P02792; Q6IBT7; Q7Z2W1; Q86WI9; Q8WU07; Q96AU9; Q96CU0; Q9BTZ8	ENSG00000087086	Nuclear receptors meta-pathway; NRF2 pathway; Ferroptosis; Neurodegeneration with brain iron accumulation (NBIA) subtypes pathway	8	0	2.98426e+08	1178709130	9.44317e+08	8.06701e+08	9.77974e+07	2.3759e+08	7.98335e+08	1157148344	9.86168e+08	2.60636e+08	9.22196e+08	2217838110	8.63823e+08	5.97631e+08	1939710377	4.67539e+08	1044658777	1943145782
High	Master Protein	Q02790	Peptidyl-prolyl cis-trans isomerase FKBP4 OS=Homo sapiens OX=9606 GN=FKBP4 PE=1 SV=3	0	228.805	50	25	1209	25	459	51.8	5.43	250.16	244.01	78.03	327.7	345.24	580.91	18	17	13	19	19	24	2288	FKBP4	D3DUQ1; hsa:2288; Q02790; Q9UCP1; Q9UCV7	ENSG00000004478	Androgen receptor signaling pathway	6	0	8.10663e+08	1137020061	907132597	9.55198e+08	1641393990	1098218237	7.17583e+08	1536671599	1394139382	1094579076	1180505575	9.97101e+08	1153198484	1068980318	1242334611	8.0897e+08	853145508	7.05804e+08
High	Master Protein	P32119	Peroxiredoxin-2 OS=Homo sapiens OX=9606 GN=PRDX2 PE=1 SV=5	0	228.717	44	17	6341	16	198	21.9	5.97	1432.15	1633.02	587.48	2625.79	2311.86	2534.54	17	17	16	17	17	17	7001	PRDX2	A8K0C0; hsa:7001; P31945; P32118; P32119; P35701; Q6FHG4; Q92763; Q9UC23	ENSG00000167815	Selenium micronutrient network; VEGFA-VEGFR2 signaling	5	0	6438211947	3585043199	5244822742	3631960389	3568059003	4178438933	3945585695	3296008672	5418928837	3526376174	3789876456	3380099438	3777607853	3533392489	3486537276	2731355166	3849093921	2918909737
High	Master Protein	P12955	Xaa-Pro dipeptidase OS=Homo sapiens OX=9606 GN=PEPD PE=1 SV=3	0	228.287	42	19	3478	19	493	54.5	6	718.59	846.35	242.8	1009.76	981.03	1129.95	16	18	13	16	16	17	5184	PEPD	A8K3Z1; A8K416; A8K696; A8MX47; B4DDB7; B4DGJ1; E9PCE8; hsa:5184; P12955; Q8TBN9; Q9BT75	ENSG00000124299		0	0	2327546013	1738544508	2108696842	2066137896	2375587923	3248623573	1925757909	1905383499	2517281538	1882668647	2230648621	2412098619	2208010657	1780196528	2486101173	1281367795	1735282868	1195476509
High	Master Protein	Q13435	Splicing factor 3B subunit 2 OS=Homo sapiens OX=9606 GN=SF3B2 PE=1 SV=2	0	227.452	41	32	1030	32	895	100.2	5.67	194.34	192.08	59.22	327.97	424.2	478.88	26	22	14	28	28	31	10992	SF3B2	A8K485; B4DT19; hsa:10992; Q13435; Q7L4T5; Q7Z627; Q969K1; Q96CM6; Q9BWD2	ENSG00000087365	mRNA processing	3	0	5.25088e+08	7.22959e+08	8.20647e+08	6.11822e+08	5.74332e+08	8.48828e+08	693257299	7.29269e+08	7.5161e+08	5.62431e+08	8.47702e+08	5.57369e+08	7.95274e+08	6.53726e+08	7.61894e+08	7.63473e+08	7.10077e+08	299090433
High	Master Protein	P40121	Macrophage-capping protein OS=Homo sapiens OX=9606 GN=CAPG PE=1 SV=2	0	227.382	53	20	2848	20	348	38.5	6.19	569.5	717.57	332.4	1294.21	1414.8	1207.94	16	17	15	19	19	18	822	CAPG	B8ZZS7; D6W5K8; hsa:822; P40121; Q53SA7	ENSG00000042493	TYROBP causal network in microglia	1	0	1412177491	1228285048	2691965582	1441871065	1215673643	1528695654	1619403807	1894095522	1340086969	7.64949e+08	907411996	1254766905	1900131744	1865169408	2103597013	1384852968	1655183649	2229849683
High	Master Protein	P52566	Rho GDP-dissociation inhibitor 2 OS=Homo sapiens OX=9606 GN=ARHGDIB PE=1 SV=3	0	226.971	75	22	1961	22	201	23	5.21	328.29	466.53	188.75	800.45	773.14	724.72	14	16	12	17	20	19	397	ARHGDIB	B5BU79; hsa:397; P52566	ENSG00000111348	Fas ligand pathway and stress induction of heat shock proteins; G13 signaling pathway	8	0	1388611592	1526609463	1225411548	1393106049	7.09278e+08	949621581	7.91167e+08	1660824275	1306545486	1075031802	8.56655e+08	6.63916e+08	1439220387	2950925831	1378326519	4834429007	1684805325	8.45788e+08
High	Master Protein	Q9UJU6	Drebrin-like protein OS=Homo sapiens OX=9606 GN=DBNL PE=1 SV=1	0	226.491	49	24	1828	3	430	48.2	5.05	442.21	470.54	220.06	784.39	804.17	808.27	19	18	18	22	22	20	28988	DBNL	A4D2I9; B4DDP6; B4DEM2; C9J7P1; hsa:28988; P84070; Q6IAI8; Q96F30; Q96K74; Q9HBN8; Q9NR72; Q9UJU6	ENSG00000136279	T-cell receptor signaling pathway	4	25	8.21297e+08	7.33055e+08	8.64021e+08	785336686	9.15067e+08	8.84727e+08	9.96958e+08	1068030338	8.07905e+08	595602695	8.78195e+08	7.53554e+08	1038208194	1048086279	9.01403e+08	1143471394	8.19522e+08	9.06854e+08
High	Master Protein	O75306	NADH dehydrogenase [ubiquinone] iron-sulfur protein 2, mitochondrial OS=Homo sapiens OX=9606 GN=NDUFS2 PE=1 SV=2	0	226.264	50	18	1084	18	463	52.5	7.55	195.27	249.36	43.76	279.22	303.41	567.76	14	15	9	15	17	18	4720	NDUFS2	D3DVG7; hsa:4720; J3KPM7; O75306; Q5VTW0; Q969P3; Q9UEV3	ENSG00000158864	Electron transport chain: OXPHOS system in mitochondria; Nonalcoholic fatty liver disease; Oxidative phosphorylation	5	0	2.19009e+08	2.09122e+08	4.9754e+08	5.03038e+08	2.30159e+08	3.64995e+08	4.31467e+08	2.36271e+08	4.22215e+08	1.78366e+08	3.7263e+08	3.97276e+08	1.98875e+08	2.84257e+08	3.73219e+08	1.45808e+08	2.74883e+08	2.46993e+08
High	Master Protein	P19823	Inter-alpha-trypsin inhibitor heavy chain H2 OS=Homo sapiens OX=9606 GN=ITIH2 PE=1 SV=2	0	225.928	30	29	1435	29	946	106.4	6.86	335.46	302.39	94.64	349.16	650.42	155.58	23	22	19	22	29	18	3698	ITIH2	hsa:3698; P19823; Q14659; Q15484; Q5T986	ENSG00000151655		2	0	1540760819	1277046858	7.00272e+08	1781047751	2.75784e+08	9.78148e+08	7.271e+08	5.2947e+08	519621615	8.00192e+08	9.48555e+08	8.89389e+08	7.692e+08	2007338876	2109885852	3112214456	1850000179	1204386782
High	Master Protein	Q96JY6	PDZ and LIM domain protein 2 OS=Homo sapiens OX=9606 GN=PDLIM2 PE=1 SV=1	0	225.476	61	21	2467	21	352	37.4	8.72	713	762.37	159.49	1087.45	1039.55	1486.86	18	16	10	20	17	21	64236	PDLIM2	D3DSR5; hsa:64236; J3KNH4; Q7Z584; Q86WM8; Q8WZ29; Q96JY6; Q9H4L9; Q9H7I2	ENSG00000120913		0	0	1283354097	1039276055	1735588901	2257925611	2331325940	1402718098	1559559133	1615706566	7.34189e+08	7.04137e+08	2025613695	2406092357	2123783596	1025655868	1160739371	8.58065e+08	1127004085	6.14308e+08
High	Master Protein	Q14195-2	Isoform LCRMP-4 of Dihydropyrimidinase-related protein 3 OS=Homo sapiens OX=9606 GN=DPYSL3	0	225.467	59	30	2240	25	684	73.9	6.35	632	828.33	208.98	980.81	843.63	801.3	21	22	14	19	23	19		DPYSL3	Q14195-2			0	1	8.86003e+08	8.01464e+08	4.62796e+08	9.62361e+08	433691987	4.97608e+08	4.55891e+08	4.55461e+08	4.92825e+08	4.00769e+08	6.52784e+08	1003058097	8.65414e+08	7.17455e+08	6.46816e+08	1019471654	8.60683e+08	6.36451e+08
High	Master Protein	O60664	Perilipin-3 OS=Homo sapiens OX=9606 GN=PLIN3 PE=1 SV=3	0	224.95	57	18	1731	18	434	47	5.44	423.1	461.2	256.41	847.52	996.46	779.63	17	16	15	17	18	17	10226	PLIN3	A8K4Y9; hsa:10226; K7EQF4; O60664; Q53G77; Q9BS03; Q9UBD7; Q9UP92	ENSG00000105355		6	0	9.43183e+08	1286439010	5.64982e+08	7.84643e+08	6.22594e+08	1215847141	7.97757e+08	1008181201	6.31028e+08	4.02192e+08	9.16183e+08	6.49219e+08	1282617538	1279865972	1035819663	1707024638	1351496088	7.83334e+08
High	Master Protein	P19224	UDP-glucuronosyltransferase 1-6 OS=Homo sapiens OX=9606 GN=UGT1A6 PE=1 SV=2	0	224.827	25	18	2299	9	532	60.7	8.41	472.68	493.76	93.99	653.97	874.11	835.75	16	16	14	17	17	18	54578	UGT1A6	A6NKK6; B8K289; hsa:54578; P19224; Q96TE7	ENSG00000167165	Codeine and morphine metabolism; Aryl hydrocarbon receptor pathway; Constitutive androstane receptor pathway; Pregnane X receptor pathway; Nuclear receptors meta-pathway; NRF2 pathway; Oxidative stress response; 2q37 copy number variation syndrome; Estrogen metabolism; Glucuronidation; Metapathway biotransformation Phase I and II	14	0	2.45049e+08	3.92243e+08	122619369	1.85598e+08	8.77229e+07	1.66329e+08	9.9611e+07	2.52284e+08	1.99383e+08	3.41449e+08	2.84655e+08	9.76315e+07	2.26702e+08	2.19104e+08	2.92405e+08	6.49008e+08	275357190	2.15854e+08
High	Master Protein	Q9NQR4	Omega-amidase NIT2 OS=Homo sapiens OX=9606 GN=NIT2 PE=1 SV=1	0	224.812	72	25	2522	25	276	30.6	7.21	640.76	784.92	222.26	893.1	946.77	1418.02	21	20	17	22	22	22	56954	NIT2	B2R9A3; D3DN47; hsa:56954; Q8WUF0; Q9NQR4	ENSG00000114021		1	0	1580236642	9.92594e+08	1505512071	2324565520	1297339482	1349211833	1037821889	1526032101	2063254236	902603125	1337255249	1753256756	1496703997	1088284028	1509187318	6.12334e+08	1584371195	8.38018e+08
High	Master Protein	Q99623	Prohibitin-2 OS=Homo sapiens OX=9606 GN=PHB2 PE=1 SV=2	0	224.502	74	24	3057	24	299	33.3	9.83	630.02	687.69	245.73	1105.69	940.44	1356.17	22	22	17	23	21	22	11331	PHB2	B4DP75; hsa:11331; Q2YDA4; Q7KYU3; Q92978; Q99623	ENSG00000215021		1	0	1301788654	1357564140	2636821104	2290136704	1479705341	1091159426	2148789064	2357943034	2951502782	1722880868	1530661030	2616545384	2336626968	1445964795	1689367848	7.85896e+08	1349713085	1613766510
High	Master Protein	O75521	Enoyl-CoA delta isomerase 2 OS=Homo sapiens OX=9606 GN=ECI2 PE=1 SV=4	0	224.384	52	22	1994	22	394	43.6	9	281.71	474.81	129.8	508.02	426.12	785.34	17	15	9	15	15	22	10455	ECI2	hsa:10455; O75521; Q5JYK5; Q5JYK7; Q7L124; Q8N0X0; Q9BUE9; Q9H0T9; Q9NQH1; Q9NYH7; Q9UN55	ENSG00000198721		0	0	964057379	5.89907e+08	1061964567	1411449191	1878663383	9.13652e+08	1049794982	1128548700	5.88653e+08	1161036688	1068732603	1604348125	1220230576	4.9476e+08	1088179676	2.53857e+08	7.0079e+08	7.3151e+08
High	Master Protein	Q6WCQ1	Myosin phosphatase Rho-interacting protein OS=Homo sapiens OX=9606 GN=MPRIP PE=1 SV=3	0	224.058	40	32	763	31	1025	116.5	6.21	138.93	210.99	60.57	298.07	283.06	329.19	19	16	14	24	25	25	23164	MPRIP	hsa:23164; Q3KQZ5; Q5FB94; Q6DHW2; Q6WCQ1; Q7Z5Y2; Q8N390; Q96G40	ENSG00000133030		1	1	3.09989e+08	3.64192e+08	2.86869e+08	3.54103e+08	2.50172e+08	2.80458e+08	3.10215e+08	3.36055e+08	2.36579e+08	263067633	3.61669e+08	3.49286e+08	4.16597e+08	3.45023e+08	4.1383e+08	3.67974e+08	4.08893e+08	2.00038e+08
High	Master Protein	P27487	Dipeptidyl peptidase 4 OS=Homo sapiens OX=9606 GN=DPP4 PE=1 SV=2	0	223.943	29	25	2553	25	766	88.2	6.04	510.92	734.39	132.27	790.86	580.55	1205.2	23	23	20	23	21	25	1803	DPP4	hsa:1803; P27487; Q53TN1	ENSG00000197635	Ferroptosis	3	0	1229634203	2007076722	1397999596	1921668406	1882337567	1313526886	1746407938	2070994614	2153490774	2857228386	1780988861	1755634176	1188309708	1660736181	2054763514	1083030438	1078523876	1824402079
High	Master Protein	P02042	Hemoglobin subunit delta OS=Homo sapiens OX=9606 GN=HBD PE=1 SV=2	0	223.857	88	14	6518	7	147	16	8.05	1935.36	2533.11	764.12	2040.07	2666.4	1860.67	14	14	12	14	14	14	3045	HBD	hsa:3045; P02042; Q3Y5H3; Q8WXT7	ENSG00000223609	VEGFA-VEGFR2 signaling	2	0	3309260429	2.6534e+08	1838075141	1.93856e+08	2.80865e+08	5.65389e+08	5.56784e+08	276582521	1.10705e+08	2.69922e+07	3.6589e+08	2.07208e+08	3.29915e+08	6.29229e+08	2.34626e+08	2.14177e+08	4.07674e+08	3.00998e+08
High	Master Protein	Q16698	2,4-dienoyl-CoA reductase [(3E)-enoyl-CoA-producing], mitochondrial OS=Homo sapiens OX=9606 GN=DECR1 PE=1 SV=1	0	223.507	63	21	4506	21	335	36	9.28	900.87	1165.15	372.24	1555.72	1428.11	1825.73	19	18	16	20	18	20	1666	DECR1	B7Z6B8; hsa:1666; Q16698; Q2M304; Q93085	ENSG00000104325	Fatty acid beta-oxidation; Fatty acid biosynthesis; VEGFA-VEGFR2 signaling	4	0	3344791693	2862273716	4777805898	4873587308	5227148815	4307857666	3876977475	4809306790	5608385512	1983675594	4066337713	5403731031	4478892473	2536305519	4422420523	1576305469	2932536398	2632313809
High	Master Protein	Q9UDY2	Tight junction protein ZO-2 OS=Homo sapiens OX=9606 GN=TJP2 PE=1 SV=2	0	223.201	32	33	1280	33	1190	133.9	7.4	235.72	227.36	61.76	319.39	429.34	529.17	25	22	19	29	26	30	9414	TJP2	A2A3H9; B7Z2R8; B7Z7T6; F5H301; F5H886; hsa:9414; Q15883; Q5VXL0; Q5VXL1; Q8N756; Q8NI14; Q99839; Q9UDY0; Q9UDY1; Q9UDY2	ENSG00000119139	1q21.1 copy number variation syndrome	6	0	5.03002e+08	6.18778e+08	4.89827e+08	6.19558e+08	6.29652e+08	7.28477e+08	4.25412e+08	6.23965e+08	6.70442e+08	4.31515e+08	6.58603e+08	4.29746e+08	5.82799e+08	576614054	6.33814e+08	4.71484e+08	4.6802e+08	701221169
High	Master Protein	P48047	ATP synthase subunit O, mitochondrial OS=Homo sapiens OX=9606 GN=ATP5PO PE=1 SV=1	0	222.825	76	18	3726	18	213	23.3	9.96	1029.34	1077.47	381.13	1413.51	1294.95	1853.34	16	14	14	17	14	18	539	ATP5PO	B2R4E2; hsa:539; P48047; Q5U042; Q6IBI2	ENSG00000241837	Electron transport chain: OXPHOS system in mitochondria; 7q11.23 copy number variation syndrome; Oxidative phosphorylation	5	0	3052583573	2650877544	3398655430	4650299935	2637392974	1500395257	3856216994	2628336754	2196911701	1322080488	3748404232	5054796563	5105338133	2551244519	3689998607	2276251679	2912019215	2458228693
High	Master Protein	P22307	Sterol carrier protein 2 OS=Homo sapiens OX=9606 GN=SCP2 PE=1 SV=2	0	222.673	46	28	3098	28	547	59	6.89	546.91	623.92	230.91	799.46	1038.37	1167.17	23	25	16	21	26	26	6342	SCP2	A6NM69; B4DGJ9; B4DHP6; C9JC79; D3DQ37; E1B6W5; F2Z3J1; hsa:6342; P22307; Q15432; Q16622; Q5VVZ1; Q6NXF4; Q99430	ENSG00000116171	PPAR-alpha pathway; Nuclear receptors meta-pathway; Mitochondrial long chain fatty acid beta-oxidation; PPAR signaling pathway; Neurodegeneration with brain iron accumulation (NBIA) subtypes pathway; Mitochondrial fatty acid oxidation disorders; Disorders of bile acid synthesis and biliary transport; DNA damage response (only ATM dependent)	11	0	2490006816	1523156012	3660285041	2795814905	1427827998	1383698935	2647676658	2494003285	2655749122	8.93291e+08	2276750790	2459207873	2345754492	1712605375	2862856754	1322695772	1939436696	1874201495
High	Master Protein	P08603	Complement factor H OS=Homo sapiens OX=9606 GN=CFH PE=1 SV=4	0	222.635	23	29	1612	26	1231	139	6.61	396.73	443.66	181.07	623.9	575.28	391.7	20	23	21	24	23	20	3075	CFH	A5PL14; hsa:3075; P08603; P78435; Q14570; Q2TAZ5; Q38G77; Q5TFM3; Q8N708; Q9NU86	ENSG00000000971	Complement system; Complement system in neuronal development and plasticity; Network map of SARS-CoV-2 signaling pathway; Complement and coagulation cascades	5	5	8.04401e+08	7.70527e+08	7.2562e+08	5.41831e+08	6.04536e+08	590931449	6.48795e+08	6.16439e+08	5.12299e+08	429601277	7.45289e+08	6.33569e+08	7.05534e+08	9.28326e+08	6.89646e+08	8.21768e+08	9.34193e+08	4.41155e+08
High	Master Protein	P46939	Utrophin OS=Homo sapiens OX=9606 GN=UTRN PE=1 SV=2	0	222.274	16	42	479	41	3433	394.2	5.33	102.9	132.86	22.74	164.95	153.73	145.22	23	24	12	28	30	30	7402	UTRN	hsa:7402; P46939; Q5SYY1; Q5SZ57; Q9UJ40	ENSG00000152818	Primary focal segmental glomerulosclerosis (FSGS)	2	2	511572102	4.29456e+08	2.0392e+08	3.70325e+08	4.77145e+08	5.46564e+08	4.1046e+08	4.66427e+08	2.19565e+08	356442677	3.09326e+08	3.89427e+08	8.73188e+08	5.69124e+08	3.47131e+08	1.97245e+08	5.28269e+08	4.80704e+08
High	Master Protein	P45974	Ubiquitin carboxyl-terminal hydrolase 5 OS=Homo sapiens OX=9606 GN=USP5 PE=1 SV=2	0	222.237	38	29	1890	29	858	95.7	5.03	356.09	472.02	137.18	669.77	673.11	774.73	20	21	18	22	26	25	8078	USP5	D3DUS7; D3DUS8; hsa:8078; P45974; Q96J22	ENSG00000111667	IL-18 signaling pathway	3	0	6.14156e+08	7.67817e+08	4.99971e+08	7.52823e+08	7.45383e+08	6.05613e+08	6.47331e+08	6.66533e+08	5.37803e+08	4.84206e+08	7.94091e+08	7.52297e+08	8.07268e+08	8.54713e+08	8.50488e+08	756932338	7.97277e+08	6.29556e+08
High	Master Protein	P21796	Voltage-dependent anion-selective channel protein 1 OS=Homo sapiens OX=9606 GN=VDAC1 PE=1 SV=2	0	221.331	72	21	3630	20	283	30.8	8.54	877.91	956.72	340.82	1241.98	1192.11	1729.3	17	17	17	17	18	21	7416	VDAC1	B3KVK4; D3DQ93; hsa:7416; P21796; Q5FVE7; Q9UIQ5; Q9UPL0	ENSG00000213585	Alzheimer's disease and miRNA effects; Alzheimer's disease; Arsenic metabolism and reactive oxygen species generation; Cholesterol metabolism; Fatty Acids and Lipoproteins Transport in Hepatocytes	10	1	3821329947	3751060078	5271053815	4488768940	1128683408	1058215571	2629043040	1702708766	1702299815	2582179957	4462767616	3753045406	3520541675	3681702295	4767237951	16166852656	4392291900	4312269143
High	Master Protein	O75489	NADH dehydrogenase [ubiquinone] iron-sulfur protein 3, mitochondrial OS=Homo sapiens OX=9606 GN=NDUFS3 PE=1 SV=1	0	220.324	63	21	1720	21	264	30.2	7.5	397.27	458.38	144.3	677.68	635.41	919.69	14	16	15	20	18	20	4722	NDUFS3	B2R9J1; B4DFM8; hsa:4722; O75489; Q9UNQ8	ENSG00000213619; ENSG00000285387	Electron transport chain: OXPHOS system in mitochondria; Nonalcoholic fatty liver disease; Oxidative phosphorylation	6	0	4.61794e+08	3.5388e+08	7.89159e+08	9.23661e+08	241173125	7.382e+08	6.84513e+08	5.5342e+08	903252104	1.77076e+08	7.05503e+08	6.36841e+08	465607706	4.09041e+08	4.81381e+08	2.49947e+08	4.22333e+08	1209328608
High	Master Protein	P50995	Annexin A11 OS=Homo sapiens OX=9606 GN=ANXA11 PE=1 SV=1	0	220.221	44	28	2391	27	505	54.4	7.65	522.91	581.83	225	1029.08	1118.07	1065.63	21	17	16	22	26	25	311	ANXA11	B4DVE7; hsa:311; P50995	ENSG00000122359		0	1	1027752326	1071990279	1206966622	1461857985	9.15668e+08	1201606616	1323693524	9.81859e+08	1378312647	672048449	1033676880	1062929695	1399871604	1259504789	1281979093	1063545080	1240495857	1861728929
High	Master Protein	O43301	Heat shock 70 kDa protein 12A OS=Homo sapiens OX=9606 GN=HSPA12A PE=1 SV=2	0	220.009	39	29	1583	26	675	74.9	6.77	297.25	377.44	67.43	521.47	416.09	801.16	26	29	18	28	26	29	259217	HSPA12A	hsa:259217; O43301	ENSG00000165868		1	3	7.31137e+08	8.08386e+08	952051140	2236520984	1020133610	7.65116e+08	6.71989e+08	1158560698	4.87703e+08	1021441588	1068496805	2197421008	1494373709	8.70487e+08	945060609	8.5945e+08	1532107763	1707469880
High	Master Protein	P51888	Prolargin OS=Homo sapiens OX=9606 GN=PRELP PE=1 SV=1	0	219.831	44	20	4156	20	382	43.8	9.38	821.12	884.16	307.23	1158.96	1139.78	1559.67	16	16	13	18	18	18	5549	PRELP	hsa:5549; P51888; Q6FG38	ENSG00000188783		5	0	3112602894	2262554900	3115449478	3043707991	5.18095e+08	1004975797	9.53055e+08	1825704394	9.14124e+08	1002836253	3339898684	1820592608	1278769268	1018015913	1701475799	2922719080	2286798797	6.53849e+08
High	Master Protein	Q9NYL9	Tropomodulin-3 OS=Homo sapiens OX=9606 GN=TMOD3 PE=1 SV=1	0	218.961	55	22	2022	21	352	39.6	5.19	289.07	417.68	157.42	622.11	676.25	813.3	15	16	15	19	21	19	29766	TMOD3	B2R6G7; hsa:29766; Q9NT43; Q9NYL9; Q9NZR0	ENSG00000138594	VEGFA-VEGFR2 signaling	4	1	1028811875	7.86397e+08	1637901610	1109558426	1031037431	1297967750	1011587922	1170279003	1075466921	6.61328e+08	9.30831e+08	6.93377e+08	8.53785e+08	8.53125e+08	1044791886	1061225723	8.9972e+08	8.52861e+08
High	Master Protein	Q13561	Dynactin subunit 2 OS=Homo sapiens OX=9606 GN=DCTN2 PE=1 SV=4	0	218.846	57	25	1869	25	401	44.2	5.21	281.44	371.58	197.96	585.63	737.03	800.6	20	19	15	21	23	24	10540	DCTN2	B2RBK5; hsa:10540; Q13561; Q86YN2; Q9BW17	ENSG00000175203		11	0	6.22652e+08	5.24948e+08	1044623555	1038073639	622742286	8.09106e+08	7.38594e+08	9.4999e+08	1067296550	4.17057e+08	7.40836e+08	6.72494e+08	7.52888e+08	8.54534e+08	8.06973e+08	7.64607e+08	7.08099e+08	6.91685e+08
High	Master Protein	Q9NZM1	Myoferlin OS=Homo sapiens OX=9606 GN=MYOF PE=1 SV=1	0	218.781	26	48	554	48	2061	234.6	6.18	73.3	33.76	9.8	266.05	250.87	60.83	26	15	10	35	41	22	26509	MYOF	B3KQN5; hsa:26509; Q5VWW2; Q5VWW3; Q5VWW4; Q5VWW5; Q7Z642; Q8IWH0; Q9HBU3; Q9NZM0; Q9NZM1; Q9ULL3; Q9Y4U4	ENSG00000138119	Aryl hydrocarbon receptor pathway; Nuclear receptors meta-pathway; Hepatitis C and hepatocellular carcinoma	3	0	3.23076e+08	6.13828e+08	9.78356e+07	3.51333e+08	1.62641e+08	4.51888e+08	1118805580	3.74012e+08	1.66621e+08	2.45203e+08	3.47529e+08	2.66921e+08	3.50444e+08	7.57621e+08	7.2539e+08	6.60914e+08	5.60403e+08	469774180
High	Master Protein	Q99714	3-hydroxyacyl-CoA dehydrogenase type-2 OS=Homo sapiens OX=9606 GN=HSD17B10 PE=1 SV=3	0	218.406	74	14	2790	14	261	26.9	7.78	643.22	847.76	308.33	1289.38	1159.84	1610.26	12	11	12	13	11	13	3028	HSD17B10	hsa:3028; Q5H927; Q6IBS9; Q8TCV9; Q96HD5; Q99714	ENSG00000072506	Alzheimer's disease and miRNA effects; Valproic acid pathway; Alzheimer's disease	7	0	1364523244	9.21904e+08	1861498803	1711093470	7.07826e+08	9.00094e+08	1061909186	1385943496	1063010839	5.12713e+08	1390877628	1338196026	1042412665	9.26095e+08	1515087308	8.68228e+08	8.88572e+08	1245032034
High	Master Protein	P00505	Aspartate aminotransferase, mitochondrial OS=Homo sapiens OX=9606 GN=GOT2 PE=1 SV=3	0	218.079	49	23	3465	23	430	47.5	9.01	942.28	1106.77	313.74	1367.81	1484.18	1763.38	20	18	15	19	20	22	2806	GOT2	B4DJA6; E7ERW2; hsa:2806; P00505; Q53FL3; Q9BWA3	ENSG00000125166	Alanine and aspartate metabolism; Amino acid metabolism; Metabolic reprogramming in colon cancer; NAD metabolism in oncogene-induced senescence and mitochondrial dysfunction-associated senescence; Glycolysis and gluconeogenesis	10	0	2310413219	2697868040	3075309173	3309001591	2772371350	2020320817	2425208120	2312647262	2382141330	3429076747	2812062578	4010543540	3543294850	2460922533	2987295364	1797011849	2468390107	1278952140
High	Master Protein	O00159	Unconventional myosin-Ic OS=Homo sapiens OX=9606 GN=MYO1C PE=1 SV=4	0	217.967	34	30	1122	30	1063	121.6	9.41	241.59	363.52	69.3	432.19	386.3	477.6	19	24	12	21	24	25	4641	MYO1C	hsa:4641; O00159; Q4LE56; Q6NVJ7; Q86Y95	ENSG00000197879	VEGFA-VEGFR2 signaling; Insulin signaling	7	0	4.09797e+08	6.2668e+08	2.7698e+08	7.13351e+08	4.84826e+08	5.54706e+08	5.15144e+08	4.62172e+08	2.29977e+08	5.00789e+08	3.77024e+08	5.85372e+08	3.80352e+08	6.77245e+08	5.27475e+08	6.84817e+08	5.87877e+08	8.90464e+08
High	Master Protein	A6NDB9	Paralemmin-3 OS=Homo sapiens OX=9606 GN=PALM3 PE=1 SV=2	0	217.681	43	30	634	30	673	71.7	4.53	172.96	177.95	56.08	205.86	325.93	409.5	20	16	11	18	19	27	342979	PALM3	A6NDB9; hsa:342979	ENSG00000187867; ENSG00000288318		0	0	2.79418e+08	2.32247e+08	4.63665e+08	3.8103e+08	3.58453e+08	157314273	3.51281e+08	2.59531e+08	4.49369e+08	4.31533e+08	3.05482e+08	1.29409e+08	8.31374e+07	2.3125e+08	2.85861e+08	1.6714e+08	1.50519e+08	2.06817e+08
High	Master Protein	Q562R1	Beta-actin-like protein 2 OS=Homo sapiens OX=9606 GN=ACTBL2 PE=1 SV=2	0	217.473	43	19	11939	10	376	42	5.59	2695.27	2966.96	873.24	4979.08	4056.47	3858.29	17	13	10	18	15	19	345651	ACTBL2	B2RPJ1; hsa:345651; Q562R1; Q562R2; Q562S9; Q562X8	ENSG00000169067		0	0	3908993352	3010818054	5098041726	4749350657	1654815181	8.59265e+08	5979297715	4100944221	1543196254	5.6181e+08	2084823174	7527909063	5269953130	4908810883	6198947072	9.17117e+08	7590154065	6562218857
High	Master Protein	Q99536	Synaptic vesicle membrane protein VAT-1 homolog OS=Homo sapiens OX=9606 GN=VAT1 PE=1 SV=2	0	217.106	59	21	2457	21	393	41.9	6.29	822.63	799.99	218.96	1263.07	1275.95	1250.52	18	16	12	18	20	16	10493	VAT1	A8K345; B0AZP7; B4DPX4; hsa:10493; Q13035; Q5BKZ7; Q96A39; Q99536; Q9BUT8	ENSG00000108828		1	0	1113365803	1599069166	7.15111e+08	1244493444	1661464393	1129576547	1268218667	1038066913	6.15997e+08	9.31087e+08	1190826271	1295207787	1517495959	2093019380	1957521777	1313550613	1252766125	7.91104e+08
High	Master Protein	Q1KMD3	Heterogeneous nuclear ribonucleoprotein U-like protein 2 OS=Homo sapiens OX=9606 GN=HNRNPUL2 PE=1 SV=1	0	216.611	35	27	1060	27	747	85.1	4.91	121.78	134.9	37.14	251.87	284.05	368.75	19	19	14	24	26	27	221092	HNRNPUL2	hsa:221092; Q1KMD3; Q8N3B3	ENSG00000214753		0	0	5.62495e+08	5.63976e+08	4.22999e+08	5.02841e+08	398311190	606107881	5.30032e+08	5.58675e+08	7.57093e+08	6.28327e+08	4.60034e+08	4.5129e+08	4.91739e+08	5.17142e+08	5.78699e+08	4.90456e+08	520133087	3.73546e+08
High	Master Protein	P08559	Pyruvate dehydrogenase E1 component subunit alpha, somatic form, mitochondrial OS=Homo sapiens OX=9606 GN=PDHA1 PE=1 SV=3	0	216.511	53	26	2820	26	390	43.3	8.06	611.62	712.56	238.11	902.53	890.2	1100.77	19	19	15	19	23	23	5160	PDHA1	A5YVE9; B2R5P7; B7Z3T7; B7Z3X5; hsa:5160; P08559; Q53H41; Q5JPT8; Q9NP12; Q9UBJ8; Q9UBU0; Q9UNG4; Q9UNG5	ENSG00000131828	TCA cycle and deficiency of pyruvate dehydrogenase complex (PDHc); Amino acid metabolism; Lipid metabolism pathway; PI3K/AKT/mTOR - vitamin D3 signaling; Metabolic reprogramming in colon cancer; Thiamine metabolic pathways; TCA cycle in senescence; Neuroinflammation and glutamatergic signaling; Acetylcholine synthesis; Glycolysis and gluconeogenesis	14	0	1304241250	1260741346	1898859359	1423881849	1649724769	8.93198e+08	1714799707	1677068472	1731072099	9.42711e+08	1505517784	1115828169	1591079695	1103693844	1312463449	7.58992e+08	9.29303e+08	2241296499
High	Master Protein	P0DP25	Calmodulin-3 OS=Homo sapiens OX=9606 GN=CALM3 PE=1 SV=1	0	216.302	62	14	4399	12	149	16.8	4.22	692.43	966.27	489.17	1413.86	1623.73	1743.08	12	13	13	13	14	14	801; 805; 808	CALM3	hsa:801; hsa:805; hsa:808; P02593; P0DP25; P62158; P70667; P99014; Q13942; Q53S29; Q61379; Q61380; Q96HK3	ENSG00000160014	Physiological and pathological hypertrophy of the heart; MicroRNAs in cardiomyocyte hypertrophy; Alzheimer's disease and miRNA effects; T cell receptor and co-stimulatory signaling; Cardiac hypertrophic response; Myometrial relaxation and contraction pathways; G protein signaling pathways; Ras signaling; Melanoma; Endochondral ossification; Endochondral ossification with skeletal dysplasias; CAMK…	17	2	1398678774	9.95631e+08	1939644757	1532491795	3.40111e+08	1017033766	1061019504	1655865844	2132078553	1605345361	1175645687	5.85219e+08	6.94463e+08	1254081444	1150849661	2075473019	7.86069e+08	1926935514
High	Master Protein	P30533	Alpha-2-macroglobulin receptor-associated protein OS=Homo sapiens OX=9606 GN=LRPAP1 PE=1 SV=1	0	215.646	54	27	1823	27	357	41.4	8.78	380.56	440.76	161.5	657.82	794.94	711.72	23	23	21	23	26	27	4043	LRPAP1	D3DVR9; hsa:4043; P30533; Q2M310; Q53HQ3; Q53HS6	ENSG00000163956	Cholesterol metabolism	1	0	8.8596e+08	1345433389	1463224897	1191510494	1256961866	1440268055	1263314609	1097325241	2213109929	8.77963e+08	1172029516	8.26839e+08	1494034210	6.68887e+08	9.92836e+08	8.47879e+08	8.00981e+08	5.13691e+08
High	Master Protein	P34913	Bifunctional epoxide hydrolase 2 OS=Homo sapiens OX=9606 GN=EPHX2 PE=1 SV=2	0	215.147	48	26	2087	26	555	62.6	6.28	276.03	478.93	124.31	514.67	481.55	790.44	19	19	16	19	19	23	2053	EPHX2	B2Z3B1; B3KTU8; B3KUA0; G3V134; hsa:2053; J3KPH7; P34913; Q16764; Q9HBJ1; Q9HBJ2	ENSG00000120915	Eicosanoid metabolism via cytochrome P450 monooxygenases pathway; Familial hyperlipidemia type 2; Alpha-linolenic acid oxylipin metabolism; Linoleic acid oxylipin metabolism; Docosahexaenoic acid oxylipin metabolism; Arachidonic acid (AA, ARA) oxylipin metabolism; Arachidonate epoxygenase / epoxide hydrolase; Metapathway biotransformation Phase I and II	11	0	581256690	4.76484e+08	6.62758e+08	8.20043e+08	8.79455e+08	5.17367e+08	8.67137e+08	6.94935e+08	7.68498e+08	6.54052e+08	6.4757e+08	6.6734e+08	4.80262e+08	3.79825e+08	6.23456e+08	1206693706	6.4532e+08	7.72061e+08
High	Master Protein	Q99497	Parkinson disease protein 7 OS=Homo sapiens OX=9606 GN=PARK7 PE=1 SV=2	0	214.91	84	19	3323	19	189	19.9	6.79	754.2	874.64	383.64	1163.65	1290.75	1556.25	14	12	12	13	14	14	11315	PARK7	B2R4Z1; hsa:11315; O14805; Q6DR95; Q7LFU2; Q99497	ENSG00000116288	Androgen receptor signaling pathway; Synaptic vesicle pathway; Parkinson's disease pathway	7	0	2002815004	1668573314	1991054642	3273078323	4093769391	3261293335	1906293160	2329763730	3216166225	9.25919e+08	1506395025	1372897269	1366308883	1673313110	1755001351	1279186516	1669429040	2189532408
High	Master Protein	Q14677-3	Isoform 3 of Clathrin interactor 1 OS=Homo sapiens OX=9606 GN=CLINT1	0	214.086	39	28	1009	28	643	70.3	6.58	213.04	188.57	68.49	281.24	347.01	499.87	20	20	12	19	24	27		CLINT1	Q14677-3			0	0	7.71016e+08	6.60017e+08	6.4683e+08	6.30042e+08	4.0442e+08	4.81111e+08	6.39962e+08	7.12937e+08	7.66004e+08	3.30688e+08	5.14782e+08	4.66074e+08	5.44159e+08	6.19215e+08	509468751	3.39818e+08	4.48315e+08	2.59638e+08
High	Master Protein	Q15365	Poly(rC)-binding protein 1 OS=Homo sapiens OX=9606 GN=PCBP1 PE=1 SV=2	0	214	62	17	2231	12	356	37.5	7.09	518.5	582.76	162.28	910.15	885.76	890.51	12	12	10	16	15	14	5093	PCBP1	hsa:5093; Q13157; Q14975; Q15365	ENSG00000169564	Ferroptosis	3	7	1281792054	1285708223	1251608226	1616659294	1540056966	1348070504	1568166124	1224160954	7.75785e+08	1223259359	1253582311	1326614488	1392685131	1595779481	1468780407	1375635255	1307469571	1388077220
High	Master Protein	P05141	ADP/ATP translocase 2 OS=Homo sapiens OX=9606 GN=SLC25A5 PE=1 SV=7	0	213.703	59	30	4136	12	298	32.8	9.69	816.46	980.59	264.73	1330.39	1195.35	1339.05	23	23	19	25	25	26	292	SLC25A5	B2RCV1; hsa:292; O43350; P05141	ENSG00000005022	Electron transport chain: OXPHOS system in mitochondria; Alzheimer's disease and miRNA effects; Alzheimer's disease	5	19	1300309788	2432504401	2830232123	3248864881	8207662330	6072152859	4759623488	3785202964	4342895854	9023012847	2844438557	3074813012	3298624521	2785681976	3949614174	1785665954	2198545120	3283518610
High	Master Protein	P07148	Fatty acid-binding protein, liver OS=Homo sapiens OX=9606 GN=FABP1 PE=1 SV=1	0	213.068	91	19	4359	19	127	14.2	7.18	949.34	932.59	449.09	1356.69	1465.27	1903.65	14	11	13	16	14	17	2168	FABP1	hsa:2168; P07148	ENSG00000163586	PPAR-alpha pathway; Nuclear receptors meta-pathway; PPAR signaling pathway; Fatty acid transporters	9	0	4797455929	2909262299	5433619201	7141128440	13548592019	4567344457	5895972647	4070967100	2810495070	5323961938	7720425258	8432803684	4072228689	3139894123	3799372885	1199428143	1947160038	2619723426
High	Master Protein	Q99569	Plakophilin-4 OS=Homo sapiens OX=9606 GN=PKP4 PE=1 SV=2	0	212.944	37	32	724	32	1192	131.8	8.94	149.3	103.88	37.18	225.41	243.29	405.38	23	19	13	23	23	29	8502	PKP4	hsa:8502; Q86W91; Q99569	ENSG00000144283		5	0	8.14604e+08	7.34499e+08	6.77902e+08	7.66627e+08	1051330460	7.60269e+08	5.56906e+08	8.14606e+08	4.78704e+08	6.45153e+08	7.93119e+08	5.18269e+08	6.48753e+08	6.0572e+08	6.68364e+08	3.5968e+08	5.1421e+08	9.22456e+08
High	Master Protein	O60701	UDP-glucose 6-dehydrogenase OS=Homo sapiens OX=9606 GN=UGDH PE=1 SV=1	0	212.808	48	25	1293	25	494	55	7.12	326.64	359.66	75.91	510.4	574.78	779.23	16	16	8	17	23	23	7358	UGDH	B3KUU2; B4DN25; hsa:7358; O60589; O60701	ENSG00000109814	Glucuronidation	2	0	6.57279e+08	1013773694	5.65812e+08	6.94265e+08	8.06337e+08	5.02224e+08	8.4685e+08	4.46077e+08	5.47796e+08	4.01129e+08	1004418411	1189876665	7.14849e+08	5.88388e+08	6.40056e+08	5.06711e+08	5.31961e+08	5.93355e+08
High	Master Protein	Q9NSE4	Isoleucine--tRNA ligase, mitochondrial OS=Homo sapiens OX=9606 GN=IARS2 PE=1 SV=2	0	212.712	31	32	1449	32	1012	113.7	7.2	231.62	320.68	80.94	402.11	318.55	663.96	25	23	17	23	24	28	55699	IARS2	B2RPG8; hsa:55699; Q1M2P9; Q6PI85; Q7L439; Q86WU9; Q96D91; Q9H9Q8; Q9NSE4; Q9NW42	ENSG00000067704		1	0	4.70952e+08	637134949	4.78982e+08	7.8371e+08	1007138066	6.98433e+08	6.8493e+08	6.55119e+08	4.84639e+08	5.57937e+08	5.84741e+08	6.63776e+08	4.53254e+08	5.93336e+08	7.36164e+08	4.08479e+08	4.37689e+08	3.23456e+08
High	Master Protein	Q7Z4W1	L-xylulose reductase OS=Homo sapiens OX=9606 GN=DCXR PE=1 SV=2	0	212.402	67	21	2574	21	244	25.9	8.1	475.64	678.52	235.48	745.56	843.8	1064.31	17	19	13	16	17	20	51181	DCXR	hsa:51181; Q7Z4W1; Q9BTZ3; Q9UHY9	ENSG00000169738		2	0	1522390610	8.48073e+08	1372037259	2032650981	1206043234	7.06725e+08	1488942275	2380168326	1418054577	1256233449	1177313274	2291333020	1078933980	7.03544e+08	1383238856	5.1466e+08	6.1207e+08	1136959305
High	Master Protein	P11182	Lipoamide acyltransferase component of branched-chain alpha-keto acid dehydrogenase complex, mitochondrial OS=Homo sapiens OX=9606 GN=DBT PE=1 SV=3	0	212.179	46	24	1626	24	482	53.5	8.51	225.3	292.59	81.37	353.54	354.48	597.69	19	22	17	23	23	23	1629	DBT	B2R811; hsa:1629; P11182; Q5VVL8	ENSG00000137992		3	0	5.13953e+08	4.1436e+08	953802003	8.26145e+08	1208509173	1072148188	1108363698	1001484388	9.15233e+08	7.91963e+08	8.03525e+08	8.05106e+08	7.80674e+08	3.80275e+08	5.73609e+08	3.26835e+08	4.64177e+08	3.27894e+08
High	Master Protein	O00748	Cocaine esterase OS=Homo sapiens OX=9606 GN=CES2 PE=1 SV=1	0	211.779	37	19	2257	19	559	61.8	6.1	429.58	526.79	56.94	617.8	667.48	842.37	18	17	13	17	18	19	8824	CES2	A0A024R6X1; A8K367; hsa:8824; O00748; Q16859; Q5MAB8; Q7Z366; Q8IUP4; Q8TCP8	ENSG00000172831	Phase I biotransformations, non P450; Fluoropyrimidine activity; Irinotecan pathway; Heroin metabolism; Nuclear receptors meta-pathway; NRF2 pathway	8	0	1188777536	6.38804e+08	1070969939	1577459010	1070545442	5.88704e+08	7.94633e+08	1263395473	1380728637	8.07112e+08	1111929835	1051319442	569599620	5.74365e+08	1133055687	6.12612e+08	8.30434e+08	4.24491e+08
High	Master Protein	Q9H6S3	Epidermal growth factor receptor kinase substrate 8-like protein 2 OS=Homo sapiens OX=9606 GN=EPS8L2 PE=1 SV=2	0	211.741	46	28	1466	28	715	80.6	6.84	408.03	393.65	106.83	487.49	537.06	776.69	21	20	16	22	25	24	64787	EPS8L2	B3KSX1; B7ZKL3; hsa:64787; Q53GM8; Q8WYW7; Q96K06; Q9H6K9; Q9H6S3	ENSG00000177106		2	0	2433026375	3521922701	3551627848	3073721345	5306507054	4695700372	7.82326e+08	4617062204	1323365663	1849498658	3020291575	1868101311	3913575691	3195198406	3669974829	1513189906	2736867603	3087071969
High	Master Protein	Q9P0K7-4	Isoform 4 of Ankycorbin OS=Homo sapiens OX=9606 GN=RAI14	0	211.604	37	34	795	34	951	106.8	5.97	130.03	145.67	29.76	316.17	249.15	275.19	15	20	12	28	24	28		RAI14	Q9P0K7-4			0	0	7.36954e+08	6.9472e+08	5.72251e+08	4.39806e+08	7.23415e+08	9.11132e+08	6.05191e+08	906065786	4.3536e+08	6.26819e+08	7.37175e+08	4.37976e+08	6.80278e+08	7.0169e+08	6.76937e+08	5.31875e+08	5.41397e+08	4.88408e+08
High	Master Protein	P25325	3-mercaptopyruvate sulfurtransferase OS=Homo sapiens OX=9606 GN=MPST PE=1 SV=3	0	211.438	69	20	1953	19	297	33.2	6.6	347.23	448.84	130.42	610.82	664.26	907.74	18	18	16	19	18	18	4357	MPST	A8MZ34; B3KP52; hsa:4357; J3KPV7; O75750; P25325; Q6FHN9	ENSG00000128309	Trans-sulfuration pathway; Amino acid metabolism	3	0	7.38924e+08	5.51897e+08	1538443598	1265274310	1113869467	6.44502e+08	820318169	1089674886	7.7276e+08	4.85566e+08	7.78508e+08	1269288618	9.55734e+08	4.30369e+08	7.73755e+08	1.78966e+08	4.20728e+08	570847341
High	Master Protein	P21397	Amine oxidase [flavin-containing] A OS=Homo sapiens OX=9606 GN=MAOA PE=1 SV=1	0	211.35	43	20	2436	17	527	59.6	7.85	576.86	670.43	145.11	811.34	742.94	977.99	17	16	14	17	20	19	4128	MAOA	B4DF46; hsa:4128; P21397; Q16426	ENSG00000189221	Biogenic amine synthesis; Serotonin transporter activity; Dopamine metabolism; Melatonin metabolism and effects; Amino acid metabolism; Oxidative stress response; Neurotransmitter disorders; Tryptophan metabolism; Overlap between signal transduction pathways contributing to LMNA laminopathies; 11p11.2 copy number variation syndrome ; Biogenic amine synthesis; Sudden infant death syndrome (SIDS) s…	20	0	1272333718	1542458369	1374010083	1739268533	3149140592	1651007492	1021859405	1697711394	9.39618e+08	1442403337	1974389715	1697690203	1593107229	1630108849	2328598173	1146380642	1392766656	1743938526
High	Master Protein	Q14847	LIM and SH3 domain protein 1 OS=Homo sapiens OX=9606 GN=LASP1 PE=1 SV=2	0	210.922	60	20	3968	20	261	29.7	7.05	993.47	974.05	449.02	1686.39	1602.01	1528.12	17	17	18	17	18	18	3927	LASP1	B4DGQ0; hsa:3927; Q14847; Q96ED2; Q96IG0	ENSG00000002834	17q12 copy number variation syndrome	1	0	3073156206	3559992166	3687950641	2937309718	4461335468	4687998144	3974168799	3608363973	2844042241	2747275449	4051251725	4301147162	4167086582	3255938218	3196894339	3485841428	2909624679	1929691350
High	Master Protein	A0A0B4J2D5	Putative glutamine amidotransferase-like class 1 domain-containing protein 3B, mitochondrial OS=Homo sapiens OX=9606 GN=GATD3B PE=5 SV=1	0	210.828	55	15	2256	15	268	28.1	8.27	416.53	568.89	182.07	673.25	710.96	1168.81	14	13	11	12	13	15	8209	GATD3B	A0A0B4J2D5; A6NFJ6; A6NJY7; hsa:8209; O00650; O00660; O15011; O15012; P30042; P55346; P78474; Q92505; Q92507		Gastric cancer network 1	1	0	1262567659	8.00351e+08	2248626829	1760340665	1846880066	1394868459	2682590625	1519188099	1775706323	1688032698	1790325447	1583068424	1208986903	5.98233e+08	1106445304	3.48875e+08	6.45677e+08	4.54581e+08
High	Master Protein	P10515	Dihydrolipoyllysine-residue acetyltransferase component of pyruvate dehydrogenase complex, mitochondrial OS=Homo sapiens OX=9606 GN=DLAT PE=1 SV=3	0	209.972	31	20	1928	20	647	69	7.84	289.86	404.76	119.17	661.78	599.87	817.29	17	17	14	17	19	19	1737	DLAT	hsa:1737; P10515; Q16783; Q53EP3	ENSG00000150768	TCA cycle and deficiency of pyruvate dehydrogenase complex (PDHc); Neuroinflammation and glutamatergic signaling; Glycolysis and gluconeogenesis	7	0	7.22614e+08	9.0865e+08	1095167409	1457660075	1063410241	1236031194	1090938052	1200322608	1019311896	1107887901	1012076563	9.84447e+08	1050211303	978156681	1181160778	5.51686e+08	7.38011e+08	1476416394
High	Master Protein	P16930	Fumarylacetoacetase OS=Homo sapiens OX=9606 GN=FAH PE=1 SV=2	0	209.771	53	17	1367	17	419	46.3	6.95	254.49	344.05	55.83	486.46	518.57	743.62	12	12	11	13	16	16	2184	FAH	B2R9X1; D3DW95; hsa:2184; P16930; Q53XA7	ENSG00000103876	Amino acid metabolism	2	0	6.83194e+08	3.33769e+08	7.47746e+08	9.36946e+08	4.31261e+08	2.90956e+08	5.30655e+08	3.8862e+08	3.45637e+08	2.9019e+08	6.89703e+08	8.04591e+08	4.13828e+08	2.29887e+08	5.41206e+08	2.13556e+08	3.05647e+08	4.17432e+08
High	Master Protein	P04179	Superoxide dismutase [Mn], mitochondrial OS=Homo sapiens OX=9606 GN=SOD2 PE=1 SV=3	0	209.643	63	18	3171	18	222	24.7	8.25	644.41	691.43	270.93	1193.52	1249.33	1836.76	15	15	13	15	17	18	6648	SOD2	B2R7R1; B3KUK2; B4DL20; B4E3K9; E1P5A9; hsa:6648; P04179; P78434; Q16792; Q5TCM1; Q96EE6; Q9P2Z3	ENSG00000291237	Selenium micronutrient network; Vitamin B12 metabolism; Folate metabolism; VEGFA-VEGFR2 signaling; Oxidative stress response	10	0	1494542350	1276084206	3992459392	2125244653	8.29959e+08	9.81739e+08	2454988093	2324674199	3872531959	7.09695e+08	1389737470	1005122861	1584413150	1986345479	2708528641	1203583623	1251992911	9.13137e+08
High	Master Protein	Q08211	ATP-dependent RNA helicase A OS=Homo sapiens OX=9606 GN=DHX9 PE=1 SV=4	0	209.561	30	32	1095	32	1270	140.9	6.84	136.62	195.65	39.32	321.58	254.45	342.94	21	24	13	25	25	31	1660	DHX9	B2RNV4; hsa:1660; Q05CI5; Q08211; Q12803; Q32Q22; Q5VY62; Q6PD69; Q99556	ENSG00000135829	MECP2 and associated Rett syndrome; mRNA processing	5	0	5.68189e+08	8.2649e+08	6.00104e+08	7.81275e+08	9.42687e+08	1015890609	6.17236e+08	1023024233	8.38138e+08	1148850776	8.29535e+08	8.44633e+08	6.77212e+08	8.39467e+08	9.22931e+08	7.52353e+08	6.20366e+08	5.69642e+08
High	Master Protein	Q8WX93	Palladin OS=Homo sapiens OX=9606 GN=PALLD PE=1 SV=3	0	208.475	26	28	1597	28	1383	150.5	7.09	347.44	413.65	149.6	552.11	645.18	445.77	21	20	16	23	21	21	23022	PALLD	B3KTG2; B5MD56; B7ZMM5; hsa:23022; Q7L3E0; Q7Z3W0; Q86WE8; Q8N1M2; Q8WX93; Q9UGA0; Q9UQF5; Q9Y2J6; Q9Y3E9	ENSG00000129116		0	0	1071223328	1624959713	6.85126e+08	721735735	6.57512e+08	8.79142e+08	8.03521e+08	1151301163	1088551443	8.44132e+08	7.71598e+08	6.78206e+08	8.1288e+08	1068105282	1109193451	2067533258	1206288438	6.63319e+08
High	Master Protein	P62820	Ras-related protein Rab-1A OS=Homo sapiens OX=9606 GN=RAB1A PE=1 SV=3	0	208.326	79	21	2439	10	205	22.7	6.21	458.57	523.7	146.94	960.86	763.32	769.31	14	15	13	17	18	17	5861	RAB1A	hsa:5861; P11476; P62820; Q6FIE7; Q96N61; Q9Y3T2	ENSG00000138069		6	11	669687327	1125223131	5.45681e+08	1367667938	1389475053	1678562516	1361269706	1356491627	1846195365	2089702720	1199695764	1245096581	1269760158	2043452375	1778811707	1773008836	1302345811	2649613372
High	Master Protein	P17980	26S proteasome regulatory subunit 6A OS=Homo sapiens OX=9606 GN=PSMC3 PE=1 SV=3	0	207.912	51	22	1000	22	439	49.2	5.24	126.17	210.99	72.36	334.46	361.31	409.14	15	15	14	20	19	22	5702	PSMC3	B2R8V1; hsa:5702; P17980; Q3B757; Q3B865; Q53HU5; Q6GPG8; Q6IBS1; Q96HD3	ENSG00000165916	Proteasome degradation; Alzheimer's disease and miRNA effects; Parkin-ubiquitin proteasomal system pathway; Alzheimer's disease	63	0	3.8369e+08	372752417	3.38518e+08	3.06205e+08	3.47547e+08	3.13552e+08	2.49735e+08	2.62421e+08	1.76399e+08	1.94215e+08	3.88433e+08	3.13076e+08	3.90141e+08	4.60638e+08	4.29708e+08	5.59662e+08	3.56307e+08	6.59357e+08
High	Master Protein	P05413	Fatty acid-binding protein, heart OS=Homo sapiens OX=9606 GN=FABP3 PE=1 SV=4	0	207.748	91	17	3655	17	133	14.8	6.8	834.46	740.56	324.35	1132.29	1382.61	1413.53	16	15	14	16	16	17	2170	FABP3	B2RAB6; hsa:2170; P05413; Q5VV93; Q99957	ENSG00000121769	PPAR signaling pathway; Fatty acid transporters; Fatty Acids and Lipoproteins Transport in Hepatocytes	4	0	2919038536	5609534976	6689951096	4155680488	6450873219	5659340674	3370632076	4253285553	6987322479	8634010626	4756619434	3567610767	3922219357	5716898975	3683429492	3743394015	3760752044	1901132672
High	Master Protein	Q9UNZ2	NSFL1 cofactor p47 OS=Homo sapiens OX=9606 GN=NSFL1C PE=1 SV=2	0	207.285	71	25	1935	25	370	40.5	5.1	483.3	547.99	244.6	815.67	916.64	983.36	20	20	20	21	25	23	55968	NSFL1C	A2A2L1; B2RD74; hsa:55968; Q5JXA4; Q5JXA5; Q7Z533; Q9H102; Q9NVL9; Q9UI06; Q9UNZ2	ENSG00000088833	Alstrom syndrome	2	0	1780316429	1540636161	1343261085	1073442310	1130719812	1077134384	1232090551	1454153329	1051048185	6.57917e+08	1337970778	9.37462e+08	1314187514	1529189534	1246154134	1516831283	1815432123	5.28892e+08
High	Master Protein	Q9UBQ7	Glyoxylate reductase/hydroxypyruvate reductase OS=Homo sapiens OX=9606 GN=GRHPR PE=1 SV=1	0	206.939	59	19	1314	19	328	35.6	7.39	311.05	354.32	77.4	458.63	418.92	825.63	15	14	12	15	16	17	9380	GRHPR	hsa:9380; Q5T945; Q9H3E9; Q9H636; Q9UBQ7; Q9UKX1	ENSG00000137106		1	0	1012600398	7.72193e+08	9.74606e+08	1416739343	1037302310	5.21581e+08	1300007782	7.60739e+08	532977833	5.44472e+08	8.14193e+08	1216366188	8.9951e+08	5.56955e+08	8.18994e+08	4.49938e+08	5.29487e+08	4.90276e+08
High	Master Protein	Q9GZM7	Tubulointerstitial nephritis antigen-like OS=Homo sapiens OX=9606 GN=TINAGL1 PE=1 SV=1	0	206.736	49	20	2710	20	467	52.4	6.99	620.66	772.37	319.92	1014.63	1162.91	1172.46	13	15	11	13	16	16	64129	TINAGL1	A8K9Q5; B4DPK6; D3DPN8; hsa:64129; Q8TEJ9; Q8WZ23; Q96GZ4; Q96JW3; Q9GZM7	ENSG00000142910		0	0	2554479590	2298101127	2533387341	2465608277	6.40322e+08	9.68232e+08	3152694498	1747273425	2044510911	5.8297e+08	1336410163	2203876983	1876068946	1975474487	2011294720	3256625315	3447614669	1025870762
High	Master Protein	P05556	Integrin beta-1 OS=Homo sapiens OX=9606 GN=ITGB1 PE=1 SV=2	0	206.617	26	23	2879	23	798	88.4	5.39	437.88	575.19	241.57	880.53	798.6	929.66	18	17	16	19	19	20	3688	ITGB1	A8K6N2; D3DRX9; D3DRY3; D3DRY4; D3DRY5; hsa:3688; P05556; P78466; P78467; Q13089; Q13090; Q13091; Q13212; Q14622; Q14647; Q29RW2; Q7Z3V1; Q8WUM6	ENSG00000150093	Integrin-mediated cell adhesion; Prolactin signaling pathway; Neural crest differentiation; Arrhythmogenic right ventricular cardiomyopathy; Pathogenic Escherichia coli infection; Primary focal segmental glomerulosclerosis (FSGS); Mammary gland development pathway - Embryonic development (Stage 1 of 4); Focal adhesion; Hepatocyte growth factor receptor signaling; RAC1/PAK1/p38/MMP2 pathway; Facto…	54	0	1350976840	3004773112	1308785335	1706718297	3113421438	2615327198	1682950917	1771771515	1418827556	1961423379	2182887289	2162692569	2390278721	2645261682	1887761881	2151710617	2310271437	1190689682
High	Master Protein	Q86TX2	Acyl-coenzyme A thioesterase 1 OS=Homo sapiens OX=9606 GN=ACOT1 PE=1 SV=1	0	206.051	56	20	2305	2	421	46.2	7.34	517.95	656.04	150.51	802.67	627.17	1026.43	19	18	15	19	18	20	641371	ACOT1	A1L173; hsa:641371; Q3I5F9; Q86TX2	ENSG00000184227		1	19	1107886110	6.7674e+08	2298948648	1445159324	1407763094	1089095170	1189585403	1164137402	1216005714	9.59848e+08	1383827768	1711730736	1503217349	8.64105e+08	1241599758	4.78297e+08	8.90056e+08	7.94768e+08
High	Master Protein	P36957	Dihydrolipoyllysine-residue succinyltransferase component of 2-oxoglutarate dehydrogenase complex, mitochondrial OS=Homo sapiens OX=9606 GN=DLST PE=1 SV=4	0	205.838	45	19	6003	19	453	48.7	8.95	1519.82	1695.54	598.72	2267.71	2293.09	2763.4	17	17	16	18	17	18	1743	DLST	B7Z5W8; E7ESY5; hsa:1743; P36957; Q7LDY7; Q9BQ32	ENSG00000119689	TCA cycle and deficiency of pyruvate dehydrogenase complex (PDHc); Amino acid metabolism; Metabolic reprogramming in colon cancer; 7q11.23 copy number variation syndrome; 1p36 copy number variation syndrome; 10q11.21q11.23 copy number variation syndrome; TCA cycle (aka Krebs or citric acid cycle)	10	0	2815544083	1754486413	2853310539	4240965967	3268577492	2316876820	3310384680	2962626381	3713968855	1833640837	3712031983	3467218803	3113768642	1744796336	2989472817	4275998845	1931441747	2295733894
High	Master Protein	Q14894	Ketimine reductase mu-crystallin OS=Homo sapiens OX=9606 GN=CRYM PE=1 SV=1	0	205.749	50	15	2629	15	314	33.8	5.14	717.1	865.15	175.35	1004.23	1035.74	989.96	13	13	13	15	15	14	1428	CRYM	D5MNX0; hsa:1428; Q14894; Q5HYB7	ENSG00000103316		1	0	2622493306	2675235000	1563131824	2078308561	3446867325	1857984910	1475408302	2095861999	772543086	1101680978	4262358729	3055534516	2710947428	2479335100	1619777721	1074839403	1634084622	1686770742
High	Master Protein	P02790	Hemopexin OS=Homo sapiens OX=9606 GN=HPX PE=1 SV=2	0	205.637	52	26	4045	25	462	51.6	7.02	1004.43	1156.45	440.66	1348.09	1326.36	606.1	23	22	21	24	22	21	3263	HPX	B2R957; hsa:3263; P02790	ENSG00000110169		1	1	2939584004	2559679775	2257961630	1446616072	8.81893e+08	2625037620	1671095697	1322520115	2012353422	8.63664e+08	2272380625	1016808392	1877631325	3782284614	1849037907	3982665098	4471457112	2201010083
High	Master Protein	P52565	Rho GDP-dissociation inhibitor 1 OS=Homo sapiens OX=9606 GN=ARHGDIA PE=1 SV=3	0	204.473	72	17	3955	17	204	23.2	5.11	924.7	1030.01	401.1	1565.49	1736.54	1651.61	13	11	12	16	16	16	396	ARHGDIA	A8MXW0; B2R5X1; B4DDD3; B4DUV9; hsa:396; P52565; Q6IBM5	ENSG00000141522	Ciliary landscape; Nephrotic syndrome	11	0	2312715348	2611131655	2723395838	3455704158	1675134222	1503147079	2090432854	2385832916	1426937371	1371039413	2538143162	2694169608	2007245495	3242108926	2460943402	4173931217	2762407572	1639760159
High	Master Protein	Q8WXH0	Nesprin-2 OS=Homo sapiens OX=9606 GN=SYNE2 PE=1 SV=3	0	204.462	8	46	394	45	6885	795.9	5.36	55.5	67.2	7.4	151.2	130.21	143.85	17	19	8	29	30	34	23224	SYNE2	B4DND7; B4DPR6; hsa:23224; I6XXQ5; Q540G1; Q86YP9; Q8N1S3; Q8NF49; Q8TER7; Q8WWW3; Q8WWW4; Q8WWW5; Q8WXH0; Q8WXH1; Q9NU50; Q9UFQ4; Q9Y2L4; Q9Y4R1	ENSG00000054654	Ovarian infertility; Rett syndrome causing genes; Envelope proteins and their potential roles in EDMD physiopathology	4	1	1.59204e+08	2.60343e+08	154782461	2.39252e+08	2.78932e+08	2.19306e+08	1.21804e+08	3.03436e+08	1.33624e+08	200018427	2.11424e+08	1.72729e+08	2.09538e+08	3.96778e+08	3.65427e+08	2.23353e+08	3.15457e+08	2.47665e+08
High	Master Protein	Q92820	Gamma-glutamyl hydrolase OS=Homo sapiens OX=9606 GN=GGH PE=1 SV=2	0	204.272	49	19	2626	19	318	35.9	7.11	391.75	551.42	231.69	661.1	903.87	800.95	15	18	15	17	17	17	8836	GGH	hsa:8836; Q92820	ENSG00000137563	Fluoropyrimidine activity	2	0	2951991991	1652030586	1851634418	2659062615	1451716540	1292995067	3472623107	2257010310	3084030495	1157875057	1404544380	2174002855	3526142504	1380626776	3243534491	1781888463	2146809670	8.29211e+08
High	Master Protein	Q9UHD8	Septin-9 OS=Homo sapiens OX=9606 GN=SEPTIN9 PE=1 SV=2	0	204.104	52	31	1924	31	586	65.4	8.97	439.55	422.67	155.25	760.9	845.64	729.48	19	17	15	21	26	23	10801	SEPTIN9	A8K2V3; B3KPM0; B4DTL9; B4E0N2; B4E274; B7Z654; hsa:10801; Q96QF3; Q96QF4; Q96QF5; Q9HA04; Q9UG40; Q9UHD8; Q9Y5W4	ENSG00000184640		0	0	6.87479e+08	9.69069e+08	780604579	7.98027e+08	9.32783e+08	1006248725	1030387613	1001066604	1008193485	5.93617e+08	7.4259e+08	8.22712e+08	1082427212	9.95981e+08	9.75413e+08	7.46296e+08	964929553	7.34365e+08
High	Master Protein	P50502	Hsc70-interacting protein OS=Homo sapiens OX=9606 GN=ST13 PE=1 SV=2	0	203.7	43	17	2836	17	369	41.3	5.27	653.42	715.86	305.47	1055.92	1114.93	1361.14	14	13	13	13	16	17	6767	ST13	hsa:6767; O14999; P50502; Q2TU77	ENSG00000100380		1	0	2078277839	1999819613	2734812049	3232396886	3228124845	1721383877	2727015804	4661690295	1708854743	1010038321	2212396121	1612106759	1592446974	1512895539	1877866360	1712031180	1719092658	1471079757
High	Master Protein	Q53SF7	Cordon-bleu protein-like 1 OS=Homo sapiens OX=9606 GN=COBLL1 PE=1 SV=3	0	203.676	41	33	779	33	1128	123.8	6.58	112.43	45.95	68.03	114.42	223.95	223.04	25	18	21	23	26	29	22837	COBLL1	A6NMZ3; hsa:22837; Q53SF7; Q6IQ33; Q7Z3I6; Q9BRH4; Q9UG88; Q9Y2I3	ENSG00000082438		0	0	1.76177e+08	2.68975e+08	4.08559e+08	3.24813e+08	4.72722e+08	2.7004e+08	4.05121e+08	404416082	3.00686e+08	1.43135e+08	2.41151e+08	2.99135e+08	3.68338e+08	221579133	2.18226e+08	1.50663e+08	2.82956e+08	3.83662e+08
High	Master Protein	P53621	Coatomer subunit alpha OS=Homo sapiens OX=9606 GN=COPA PE=1 SV=2	0	203.435	29	32	999	32	1224	138.3	7.66	192.8	173.54	33.02	372.49	324.23	374.88	21	23	15	29	26	28	1314	COPA	hsa:1314; P53621; Q5T201; Q8IXZ9	ENSG00000122218		2	0	3.33059e+08	6.86081e+08	4.7516e+08	6.0456e+08	2.29398e+08	4.47181e+08	3.95403e+08	4.79099e+08	6.60686e+08	6.7394e+08	4.37459e+08	7.76044e+08	585167102	9.25035e+08	7.21631e+08	8.66683e+08	6.41206e+08	8.66949e+08
High	Master Protein	A3KMH1	von Willebrand factor A domain-containing protein 8 OS=Homo sapiens OX=9606 GN=VWA8 PE=1 SV=2	0	203.306	22	35	543	35	1905	214.7	7.4	50.1	48.99	18.01	75.99	77.8	288.23	20	21	13	20	20	33	23078	VWA8	A3KMH1; hsa:23078; O60310; Q5JTP6; Q5VW08; Q7Z6I9; Q86YC9; Q8N3E4	ENSG00000102763		0	0	1686381264	1617586190	3440551777	2146092834	4.35742e+08	2127709282	1267117727	1278133856	4281169219	1704245941	2387339406	2660282730	2721291408	1289918900	1836716353	1630065748	1622379953	4666615282
High	Master Protein	Q9Y3I0	RNA-splicing ligase RtcB homolog OS=Homo sapiens OX=9606 GN=RTCB PE=1 SV=1	0	203.08	45	19	1585	19	505	55.2	7.23	211.47	259.8	90.01	358.49	415.5	472.63	14	16	14	16	17	18	51493	RTCB	B2R6A8; hsa:51493; Q6IAI0; Q9BWL4; Q9NTH1; Q9P037; Q9P0J3; Q9Y3I0	ENSG00000100220	Unfolded protein response	2	0	8.82138e+08	1240912239	8.60819e+08	1206103316	1213358861	1109299069	7.42515e+08	1071955342	1132454940	7.76339e+08	1280807806	1272841167	1244156427	1364073386	1563160139	1089499917	1278214502	9.63352e+08
High	Master Protein	Q9H4G0-2	Isoform 2 of Band 4.1-like protein 1 OS=Homo sapiens OX=9606 GN=EPB41L1	0	202.768	39	31	1141	2	779	87.6	5.92	171.82	177.2	48.32	261.87	309.04	308.84	21	17	15	24	24	28		EPB41L1	Q9H4G0-2			0	1	3.95557e+07	3.83524e+07	6.8769e+07	1.09853e+08	49282271	4.39402e+07	2.39027e+07	3.54821e+07	4.54232e+07	2.95488e+07	3.09306e+07	6.43652e+07	5.20293e+07	3.11384e+07	5.76905e+07	4.91988e+07	4.79979e+07	1.6325e+08
High	Master Protein	Q53FZ2	Acyl-coenzyme A synthetase ACSM3, mitochondrial OS=Homo sapiens OX=9606 GN=ACSM3 PE=1 SV=2	0	202.612	43	28	1978	28	586	66.1	9.04	294.33	428.47	179.86	478.13	519.01	565.12	23	22	19	27	25	26	6296	ACSM3	hsa:6296; O60363; Q13732; Q15425; Q53FZ2; Q7KYM6; Q9BUA2	ENSG00000005187		1	0	9.74849e+08	4.49976e+08	4.65476e+07	9.76507e+08	1092677328	5.76223e+08	1113015600	8.85646e+08	3.46877e+08	467769025	7.17115e+08	9.61423e+08	9.35803e+08	4.65645e+08	1086421702	2.99098e+08	6.40606e+08	684040843
High	Master Protein	P07099	Epoxide hydrolase 1 OS=Homo sapiens OX=9606 GN=EPHX1 PE=1 SV=1	0	201.424	38	24	1311	24	455	52.9	7.25	287.47	364.46	44.76	382.29	300.02	635.69	22	22	9	21	20	24	2052	EPHX1	B2R8N0; hsa:2052; P07099; Q5VTJ6; Q9NP75; Q9NPE7; Q9NQU6; Q9NQU7; Q9NQU8; Q9NQU9; Q9NQV0; Q9NQV1; Q9NQV2	ENSG00000143819	Photodynamic therapy-induced NFE2L2 (NRF2) survival signaling; Benzene metabolism; Benzo(a)pyrene metabolism; Aflatoxin B1 metabolism; Metapathway biotransformation Phase I and II	6	0	7.38423e+08	9.47051e+08	6.42587e+08	832250938	7.10799e+08	7.76885e+08	594462877	7.73851e+08	791358798	1287079814	8.21254e+08	8.45836e+08	4.16244e+08	6.62381e+08	8.45133e+08	7.12548e+08	7.03262e+08	2.9332e+08
High	Master Protein	P09874	Poly [ADP-ribose] polymerase 1 OS=Homo sapiens OX=9606 GN=PARP1 PE=1 SV=4	0	201.309	40	32	783	32	1014	113	8.88	138.87	175.9	42.76	355.63	257.04	289.71	13	14	11	25	27	22	142	PARP1	B1ANJ4; hsa:142; P09874; Q8IUZ9	ENSG00000143799	Corticotropin-releasing hormone signaling pathway; Nanoparticle triggered regulated necrosis; Fas ligand pathway and stress induction of heat shock proteins; NAD metabolism, sirtuins and aging; NAD+ metabolism; NAD+ biosynthetic pathways; Breast cancer pathway; Acute viral myocarditis; Joubert syndrome; Male infertility; Base excision repair; IL-18 signaling pathway; DNA repair pathways, full net…	26	0	4.90754e+08	593914077	2.66157e+08	1463260420	4.86413e+08	384661429	5.30396e+08	6.27211e+08	3.34385e+08	2.42194e+08	5.84966e+08	7.96011e+08	7.39674e+08	7.97264e+08	7.50394e+08	5.40761e+08	8.01089e+08	5.38202e+08
High	Master Protein	P14927	Cytochrome b-c1 complex subunit 7 OS=Homo sapiens OX=9606 GN=UQCRB PE=1 SV=2	0	200.786	79	16	2270	16	111	13.5	8.78	636.24	673.34	269.09	913.13	967.64	1229.12	11	12	10	15	13	15	7381	UQCRB	E5RJU0; hsa:7381; P14927; Q6FGD1	ENSG00000156467	Electron transport chain: OXPHOS system in mitochondria; Nonalcoholic fatty liver disease; Mitochondrial complex III assembly; 11p11.2 copy number variation syndrome	5	0	1121294020	6.37723e+08	2413248770	1585465315	7.30728e+08	7.75409e+08	1102492819	1047076774	1277577665	3.24502e+08	1095891129	1471246277	1108189159	7.36252e+08	1230504586	4.49812e+08	9.15121e+08	6.0141e+08
High	Master Protein	P37837-2	Isoform 2 of Transaldolase OS=Homo sapiens OX=9606 GN=TALDO1	0	200.575	55	24	2960	24	327	36.4	6.14	540.28	568.89	160.5	885.24	881.84	910.43	21	21	16	22	22	22		TALDO1	P37837-2			0	0	2564264759	3532986494	3031028947	2557645586	9.46554e+08	1975040823	4168079516	2207190191	3197593581	3336717512	2994912045	2444553578	2217697735	2809899224	2768740238	1595373812	3457275369	2730270398
High	Master Protein	Q9BXF6	Rab11 family-interacting protein 5 OS=Homo sapiens OX=9606 GN=RAB11FIP5 PE=1 SV=1	0	200.39	53	26	556	26	653	70.4	9.23	93.83	124.36	39.24	155.9	236.11	262.1	15	18	11	18	19	25	26056	RAB11FIP5	hsa:26056; O94939; Q9BXF6; Q9P0M1	ENSG00000135631		0	0	3.27441e+08	3.67205e+08	5.23264e+08	2.20619e+08	4.76361e+08	3.93533e+08	371618704	4.66451e+08	6.28616e+08	1.25282e+08	3.67786e+08	2.57936e+08	3.19562e+08	3.738e+08	2.42591e+08	1.71686e+08	3.0748e+08	2.64971e+08
High	Master Protein	Q9P2R7	Succinate--CoA ligase [ADP-forming] subunit beta, mitochondrial OS=Homo sapiens OX=9606 GN=SUCLA2 PE=1 SV=3	0	199.877	56	29	1929	29	463	50.3	7.42	310.69	435.6	98.26	511.54	427.48	725.15	22	21	17	22	21	28	8803	SUCLA2	B2RDE7; hsa:8803; O95194; Q5T9Q4; Q5T9Q6; Q9NV21; Q9NVP7; Q9P2R7	ENSG00000136143		1	0	1172632091	1379000302	1515043399	1623834597	2828803855	1813480485	1891260220	1924628952	1021090162	1610547572	1546517835	1786756461	1252100267	1107442461	1579159582	3759369177	1260662088	6.59648e+08
High	Master Protein	P30044-2	Isoform Cytoplasmic+peroxisomal of Peroxiredoxin-5, mitochondrial OS=Homo sapiens OX=9606 GN=PRDX5	0	199.722	81	16	2373	16	162	17	7.24	489.66	573.23	311.55	834.46	918.41	1363.09	11	10	10	14	15	14		PRDX5	P30044-2			0	0	9.94172e+08	6.48339e+08	1488894771	1766123742	6.11212e+08	1063290167	9.1708e+08	1394955296	1588476953	3.07922e+08	6.78232e+08	6.16002e+08	6.51101e+08	8.09589e+08	1258651525	6.01591e+08	5.53304e+08	6.68849e+08
High	Master Protein	Q01484	Ankyrin-2 OS=Homo sapiens OX=9606 GN=ANK2 PE=1 SV=4	0	199.669	12	35	840	28	3957	433.4	5.14	150.56	199.27	33.6	281.23	233.55	354.88	18	22	6	22	23	28	287	ANK2	hsa:287; Q01484; Q01485; Q08AC7; Q08AC8; Q7Z3L5	ENSG00000145362		2	1	2.5275e+08	3.06126e+08	1.62288e+08	4.3832e+08	4.45336e+08	3.74182e+08	3.53119e+08	332583332	3.27258e+08	3.99067e+08	3.47452e+08	3.96694e+08	351746794	4.03391e+08	4.45838e+08	2.83971e+08	3.20058e+08	410744556
High	Master Protein	P50991	T-complex protein 1 subunit delta OS=Homo sapiens OX=9606 GN=CCT4 PE=1 SV=4	0	199.548	54	24	1271	24	539	57.9	7.83	252.28	299.61	81.09	496.95	461.56	534.88	17	15	13	19	19	23	10575	CCT4	B2R6I3; B7Z8B1; F5H5W3; hsa:10575; O14870; P50991; Q53QP9; Q96C51	ENSG00000115484	16p11.2 proximal deletion syndrome	7	0	1170138944	1795300665	4.34609e+08	6.52465e+08	2831463166	1636022048	9.69554e+08	9.57151e+08	8.41773e+08	8.09042e+08	1491185045	1379752077	1114908150	1085093948	1975442790	6.08178e+08	9.61981e+08	1966337816
High	Master Protein	O43390	Heterogeneous nuclear ribonucleoprotein R OS=Homo sapiens OX=9606 GN=HNRNPR PE=1 SV=1	0	199.545	36	24	2653	19	633	70.9	8.13	404.81	566.54	167.92	860.81	911.52	836.37	17	16	15	21	24	23	10236	HNRNPR	hsa:10236; O43390; Q2L7G6; Q5TEH1; Q9BV64; S4R3J4	ENSG00000125944; ENSG00000282958	mRNA processing	3	0	4.27514e+08	5.03223e+08	5.6832e+08	5.70711e+08	3.01648e+08	5.51716e+08	5.2758e+08	417235615	7.38826e+08	2.71824e+08	5.18701e+08	3.61648e+08	5.51387e+08	5.87269e+08	6.10947e+08	6.4198e+08	6.37654e+08	1770603184
High	Master Protein	Q9Y2Q3	Glutathione S-transferase kappa 1 OS=Homo sapiens OX=9606 GN=GSTK1 PE=1 SV=3	0	199.463	62	15	1183	15	226	25.5	8.41	311.32	347.1	126.24	429.19	443.94	683.9	11	12	10	13	12	12	373156	GSTK1	B4DIH1; B4DSY2; hsa:373156; Q6P4H0; Q7Z520; Q9P1S4; Q9Y2Q3	ENSG00000197448	Metapathway biotransformation Phase I and II	3	0	5.94662e+08	6.15929e+08	6.30293e+08	1255435968	9.30017e+08	4.79317e+08	7.5465e+08	9.48084e+08	1.92247e+08	2.63964e+08	647851534	5.61331e+08	4.935e+08	8.26359e+08	1145011824	4.60713e+08	6.02543e+08	4.34789e+08
High	Master Protein	Q6NZI2	Caveolae-associated protein 1 OS=Homo sapiens OX=9606 GN=CAVIN1 PE=1 SV=1	0	199.186	51	18	1503	18	390	43.5	5.6	393.11	707.85	216.9	461.09	594.63	511.93	13	16	12	10	14	13	284119	CAVIN1	B2RAW7; hsa:284119; O00535; Q6GMY1; Q6NZI2; Q96H74; Q9BT85; Q9HAP4	ENSG00000177469	Congenital generalized lipodystrophy	5	0	1954166328	1153813104	3.34943e+08	9.19098e+08	6.72741e+08	5.60809e+08	3.57876e+08	5.33344e+08	668540209	241109000	4.63382e+08	8.34255e+08	6.5483e+08	4.14261e+08	4.44607e+08	5.20347e+08	1024991777	496424857
High	Master Protein	P55809	Succinyl-CoA:3-ketoacid coenzyme A transferase 1, mitochondrial OS=Homo sapiens OX=9606 GN=OXCT1 PE=1 SV=1	0	198.589	45	19	1003	19	520	56.1	7.46	182.36	264.73	192.01	279.26	390	309.73	13	11	13	17	16	14	5019	OXCT1	B2R5V2; B7Z528; hsa:5019; P55809	ENSG00000083720		1	0	4.45383e+08	4.39567e+08	5.51332e+08	7.59185e+08	7.21723e+08	3.75694e+08	3.93409e+08	7.08754e+08	304443268	2.50561e+08	4.73118e+08	3.06871e+08	4.01146e+08	4.0244e+08	7.14963e+08	3.15629e+08	565900470	2.63252e+08
High	Master Protein	Q9Y2S2	Lambda-crystallin homolog OS=Homo sapiens OX=9606 GN=CRYL1 PE=1 SV=3	0	198.391	50	17	2689	17	319	35.4	6.18	550.55	675.09	191.33	922.87	1043.83	1230.64	15	16	15	16	17	17	51084	CRYL1	A0PJ43; B3KN92; hsa:51084; Q0VDI1; Q7Z4Z9; Q9P0G7; Q9Y2S2	ENSG00000165475		1	0	1910896144	1495209133	2468403059	2407898383	1910516214	1464699464	1736423282	1950471638	1658432905	2994639246	2356131275	2389894099	1594065887	1477879032	2068189976	1059494814	1489011360	8.12735e+08
High	Master Protein	Q07955	Serine/arginine-rich splicing factor 1 OS=Homo sapiens OX=9606 GN=SRSF1 PE=1 SV=2	0	198.22	63	26	2929	25	248	27.7	10.36	532.36	552.09	363.24	990.26	1073.37	1007.3	21	22	19	23	25	25	6426	SRSF1	B2R6Z7; D3DTZ3; hsa:6426; Q07955; Q13809	ENSG00000136450	mRNA processing	7	1	1057436678	1226803635	1243586921	1432071609	8.39657e+08	1009477954	1463675093	1348407758	1500766810	8.93217e+08	1101965559	9.27859e+08	1154908572	1603541956	1550385457	1759299255	1263948764	1293206494
High	Master Protein	Q14019	Coactosin-like protein OS=Homo sapiens OX=9606 GN=COTL1 PE=1 SV=3	0	197.276	91	20	3292	20	142	15.9	5.67	431.3	557.74	150.47	736.33	751.36	934.04	19	19	13	19	19	20	23406	COTL1	B2RDU3; D3DUL9; hsa:23406; Q14019; Q86XM5	ENSG00000103187		1	0	3414930669	2950717285	5298946454	3697280036	3885512574	3126594978	4105937845	2698083531	1936404974	3205667098	3625276170	3911082454	2912571155	2823255981	3078730777	1543417483	2677062507	1616051684
High	Master Protein	P16401	Histone H1.5 OS=Homo sapiens OX=9606 GN=H1-5 PE=1 SV=3	0	197.249	38	18	2090	12	226	22.6	10.92	430.35	397.67	171.29	1166.1	786.23	429	17	15	14	18	18	17	3009	H1-5	hsa:3009; P16401; Q14529; Q3MJ42	ENSG00000184357		2	0	3.28041e+08	1064933074	2.55956e+08	5.80559e+08	4.68799e+08	1577061466	1074689335	1024850162	1708718077	5.7234e+08	5.79714e+08	3.66616e+08	1662475065	3271676389	1503064124	1761566717	1752697284	1318692553
High	Master Protein	Q9UF12	Hydroxyproline dehydrogenase OS=Homo sapiens OX=9606 GN=PRODH2 PE=1 SV=1	0	197.21	35	17	1376	17	536	58.8	8.6	254.29	573.82	46.64	429.31	262.01	938.59	14	16	10	14	14	17	58510	PRODH2	hsa:58510; Q9UF12	ENSG00000250799		2	0	3.45614e+08	143502556	6.70188e+08	8.11591e+08	538694883	7.99224e+08	7.60603e+08	5.27892e+08	9.95201e+08	7.29539e+08	4.08775e+08	6.80363e+08	2.54045e+08	1.89313e+08	5.32055e+08	2.32005e+08	2.38733e+08	4.64177e+08
High	Master Protein	Q96E39	RNA binding motif protein, X-linked-like-1 OS=Homo sapiens OX=9606 GN=RBMXL1 PE=1 SV=1	0	196.22	53	28	2607	3	390	42.1	9.89	444.17	437.11	205.75	807.01	756.3	756.65	25	26	22	26	28	27	494115	RBMXL1	hsa:494115; Q96E39	ENSG00000213516		0	0	4.07302e+07	6.36944e+07	6.46002e+07	5.07003e+07	7.04454e+07	1.04477e+08	5.93677e+07	7.58647e+07	1.0124e+08	5.49201e+07	4.82417e+07	5.23874e+07	7.44187e+07	5.78303e+07	6.87768e+07	5.42215e+07	5.59477e+07	5.82733e+07
High	Master Protein	Q13409-2	Isoform 2B of Cytoplasmic dynein 1 intermediate chain 2 OS=Homo sapiens OX=9606 GN=DYNC1I2	0	195.981	36	21	1337	2	632	70.6	5.24	352.69	359.08	110.8	576.01	591.65	704.53	15	13	12	16	18	18		DYNC1I2	Q13409-2			0	22	7.12376e+08	7.17958e+08	8.76282e+08	7.76931e+08	9.40333e+08	7.1265e+08	5.00865e+08	8.53544e+08	1133224831	1010169589	7.27371e+08	5.66245e+08	615875032	7.8741e+08	8.75014e+08	1152019272	6.02078e+08	711883667
High	Master Protein	P13716	Delta-aminolevulinic acid dehydratase OS=Homo sapiens OX=9606 GN=ALAD PE=1 SV=1	0	195.978	42	14	1011	14	330	36.3	6.79	225.04	363.33	66.25	286.07	364.42	618.38	10	10	7	11	13	12	210	ALAD	A8K375; B2R6F2; hsa:210; P13716; Q16870; Q16871; Q9BVQ9	ENSG00000148218	Hemesynthesis defects and porphyrias; Heme biosynthesis	4	0	6.16243e+08	3.76213e+08	3.17557e+08	792117821	4.83513e+08	4.49476e+08	4.30523e+08	2.11201e+08	4.32166e+08	3.40687e+08	3.28059e+08	5.66676e+08	3.90513e+08	4.81439e+08	5.81552e+08	4.9666e+08	3.30174e+08	4.94214e+08
High	Master Protein	P58107	Epiplakin OS=Homo sapiens OX=9606 GN=EPPK1 PE=1 SV=3	0	195.925	29	32	614	23	5088	555.3	5.62	64	53.23	12.53	176.63	182.8	179.61	18	14	5	23	30	20	83481	EPPK1	A0A087X1U6; hsa:83481; P58107; Q76E58; Q9NSU9	ENSG00000261150		0	0	2.46581e+08	1.69469e+08	1.14448e+08	1.30784e+08	1.55517e+08	1.23217e+08	1.51554e+08	1.73118e+08	6.81873e+07	7.22023e+07	1.58301e+08	1.02014e+08	159829454	267637057	1.28121e+08	92159096	1.63156e+08	2.88355e+08
High	Master Protein	Q9Y230	RuvB-like 2 OS=Homo sapiens OX=9606 GN=RUVBL2 PE=1 SV=3	0	195.692	53	30	990	30	463	51.1	5.64	230.82	252.57	63.06	465.21	479.69	402.3	20	23	16	26	21	26	10856	RUVBL2	B3KQ59; E7ETE5; hsa:10856; Q6FIB9; Q6PK27; Q9Y230; Q9Y361	ENSG00000183207		2	0	5.56433e+08	7.50012e+08	4.37966e+08	7.3207e+08	6.15173e+08	711196054	6.35336e+08	5.44818e+08	4.54562e+08	4.35607e+08	7.92082e+08	8.48624e+08	1067159912	8.08371e+08	8.5919e+08	7.91512e+08	1018774684	9.70862e+08
High	Master Protein	P02462	Collagen alpha-1(IV) chain OS=Homo sapiens OX=9606 GN=COL4A1 PE=1 SV=4	0	195.53	10	14	3378	12	1669	160.5	8.28	951.88	1007.89	246.65	1698.27	1322.4	1703.89	11	11	10	12	14	10	1282	COL4A1	A7E2W4; B1AM70; F5H5K0; hsa:1282; P02462; Q1P9S9; Q5VWF6; Q86X41; Q8NF88; Q9NYC5	ENSG00000187498	Spinal cord injury; miRNA targets in ECM and membrane receptors; Focal adhesion; Overview of nanoparticle effects; Focal adhesion: PI3K-Akt-mTOR-signaling pathway; PI3K-Akt signaling pathway; Epithelial to mesenchymal transition in colorectal cancer; Small cell lung cancer; Malignant pleural mesothelioma; A network map of Macrophage-stimulating protein (MSP) signaling	24	2	1814345306	1933780757	3598766412	4037481515	3.86807e+08	1334489604	1937447141	2197491399	1692939572	4.35301e+08	1499468396	2693022361	1726959167	1509274762	1936420027	3680603164	3398541348	2223087709
High	Master Protein	P30043	Flavin reductase (NADPH) OS=Homo sapiens OX=9606 GN=BLVRB PE=1 SV=3	0	195.394	66	13	2260	13	206	22.1	7.65	610.05	682.82	242.27	798.63	973.81	1157.35	9	9	9	10	12	12	645	BLVRB	A6NKD8; B2R5C6; hsa:645; P30043; P32078; P53005; Q32LZ2	ENSG00000090013	Nuclear receptors meta-pathway; NRF2 pathway; IL-10 anti-inflammatory signaling pathway	5	0	3262420656	1704507200	4234523930	2445873033	1887136344	1801471506	1226931112	1904109170	1183039795	7.09463e+08	2898281994	2215258349	2006034770	2293050428	1974609768	1045654841	1967064934	7.04224e+08
High	Master Protein	P24539	ATP synthase F(0) complex subunit B1, mitochondrial OS=Homo sapiens OX=9606 GN=ATP5PB PE=1 SV=2	0	195.359	44	15	1748	15	256	28.9	9.36	416.49	510.7	119.07	599.74	599.48	920.44	14	14	12	14	14	15	515	ATP5PB	hsa:515; P24539; Q9BQ68; Q9BRU8	ENSG00000116459	Electron transport chain: OXPHOS system in mitochondria; 7q11.23 copy number variation syndrome; Oxidative phosphorylation	5	0	4.73149e+08	5.70122e+08	1514837276	1175301833	9.6941e+08	8.12975e+08	1432957486	1671191983	1955337789	9.93335e+08	6.12563e+08	8.54202e+08	6.36055e+08	6.24709e+08	8.95357e+08	391374966	5.31983e+08	2.55407e+08
High	Master Protein	P04439-2	Isoform 2 of HLA class I histocompatibility antigen, A alpha chain OS=Homo sapiens OX=9606 GN=HLA-A	0	195.053	50	19	1323	14	371	41.4	6.3	381.21	409.88	148.06	715.88	568.3	560.87	13	10	10	18	13	18		HLA-A	P04439-2			0	5	4.62278e+08	538620414	3.8216e+08	3.54003e+08	2.44452e+08	4.36444e+08	6.87973e+08	7.21344e+08	1256472039	1.78143e+08	4.83678e+08	4.20682e+08	517633722	2435637304	8.33555e+08	9.16953e+08	5.42853e+08	6.36311e+08
High	Master Protein	P13861	cAMP-dependent protein kinase type II-alpha regulatory subunit OS=Homo sapiens OX=9606 GN=PRKAR2A PE=1 SV=2	0	194.763	53	23	1478	21	404	45.5	5.07	298.7	346.55	122.38	498.91	553.67	588.37	21	17	17	20	21	22	5576	PRKAR2A	hsa:5576; P13861; Q16823; Q9BUB1	ENSG00000114302	Myometrial relaxation and contraction pathways; G protein signaling pathways; Lipid metabolism pathway; Hippo signaling regulation pathways; Hippo-Merlin signaling dysregulation; GDNF signaling; Calcium regulation in cardiac cells; Sudden infant death syndrome (SIDS) susceptibility pathways	20	3	1163014256	9.90004e+08	1321892294	1159136657	1836327562	1204656355	7.32778e+08	1248474990	6.56208e+08	9.2483e+08	1204178903	1327916249	1497368659	9.94324e+08	1252018824	8.00097e+08	9.50621e+08	7.40743e+08
High	Master Protein	Q9Y281	Cofilin-2 OS=Homo sapiens OX=9606 GN=CFL2 PE=1 SV=1	0	193.43	69	18	2370	7	166	18.7	7.88	463.44	455.28	199.89	821.29	793.55	785.68	14	14	13	16	16	17	1073	CFL2	G3V5P4; hsa:1073; Q9Y281	ENSG00000165410	Leptin signaling pathway; Microtubule cytoskeleton regulation; Regulation of actin cytoskeleton; G13 signaling pathway	4	0	1.85319e+08	3.10347e+08	3.38408e+08	3.33842e+08	3.7967e+08	2.52263e+08	2.77972e+08	1.75479e+08	198393997	1.48602e+08	2.85551e+08	3.3426e+08	2.96894e+08	2.64307e+08	2.43995e+08	7.31499e+07	350937595	4.3464e+08
High	Master Protein	P40925	Malate dehydrogenase, cytoplasmic OS=Homo sapiens OX=9606 GN=MDH1 PE=1 SV=4	0	193.412	51	20	3303	20	334	36.4	7.36	776.43	874.78	240.04	1144.57	1106.32	1401.58	17	18	15	16	19	20	4190	MDH1	B2R5V5; B4DUN2; B7Z3I7; F5H098; hsa:4190; P40925; Q6I9V0	ENSG00000014641	Sterol regulatory element-binding proteins (SREBP) signaling; TCA cycle and deficiency of pyruvate dehydrogenase complex (PDHc); Amino acid metabolism; Clear cell renal cell carcinoma pathways; NAD metabolism in oncogene-induced senescence and mitochondrial dysfunction-associated senescence; TCA cycle in senescence; Glycolysis and gluconeogenesis	8	0	3399950490	3711632785	3480155383	5173938132	3428402800	2802111526	4041170044	3078389771	2420390103	3708369961	3953443784	4674817663	3632962162	3912675569	4121254492	2630647592	3518413550	5167269417
High	Master Protein	P35914	Hydroxymethylglutaryl-CoA lyase, mitochondrial OS=Homo sapiens OX=9606 GN=HMGCL PE=1 SV=2	0	193.327	39	17	1854	17	325	34.3	8.54	303.71	405.45	137	582.8	527.39	822.35	12	12	13	15	13	17	3155	HMGCL	B4DUP4; B7UCC6; D3Y5K7; hsa:3155; P35914; Q6IBC0; Q96FP8	ENSG00000117305	Amino acid metabolism	3	0	8.30467e+08	6.64221e+08	1224465913	1424254509	1960687635	1590609246	1484130498	1440927042	1297803332	1279011225	1238857927	1573933791	1155401196	5.40334e+08	9.96356e+08	337219807	6.04255e+08	4.57643e+08
High	Master Protein	O96000	NADH dehydrogenase [ubiquinone] 1 beta subcomplex subunit 10 OS=Homo sapiens OX=9606 GN=NDUFB10 PE=1 SV=3	0	193.167	61	17	1484	17	172	20.8	8.48	410.43	445.58	162.46	425.98	501.1	817.98	15	16	12	16	15	17	4716	NDUFB10	hsa:4716; O96000; Q96II6	ENSG00000140990	Electron transport chain: OXPHOS system in mitochondria; Nonalcoholic fatty liver disease; Modulators of TCR signaling and T cell activation; Oxidative phosphorylation	6	0	1148259650	9.93532e+08	1410469540	1687253284	1004023088	1027424717	9.93624e+08	9.66307e+08	5.67225e+08	1.50153e+08	1234956965	1243925790	921254765	6.19583e+08	9.65927e+08	2.82203e+08	1013697904	5.71506e+08
High	Master Protein	P46821	Microtubule-associated protein 1B OS=Homo sapiens OX=9606 GN=MAP1B PE=1 SV=2	0	192.965	18	32	450	31	2468	270.5	4.81	79.53	144.31	28.94	161.43	147.6	97.28	19	25	13	22	20	20	4131	MAP1B	A2BDK5; hsa:4131; P46821	ENSG00000131711	Microtubule cytoskeleton regulation; Fragile X syndrome; Neurogenesis regulation in the olfactory epithelium	3	1	3.75554e+08	470194694	9.1196e+07	1.36282e+08	120999460	2.57924e+08	1.45887e+08	1.8515e+08	3.96562e+07	1.31408e+08	2.62735e+08	1.41653e+08	1.50679e+08	4.53613e+08	2.73479e+08	3.34438e+08	3.05187e+08	2.83741e+08
High	Master Protein	Q9Y2W1	Thyroid hormone receptor-associated protein 3 OS=Homo sapiens OX=9606 GN=THRAP3 PE=1 SV=2	0	192.778	29	28	981	27	955	108.6	10.15	212.18	179.27	69.32	365.8	374.25	441.27	18	14	16	19	23	24	9967	THRAP3	D3DPS5; hsa:9967; Q5VTK6; Q9Y2W1	ENSG00000054118	Interactome of polycomb repressive complex 2 (PRC2)	3	1	3.2192e+08	5.28121e+08	541865807	4.40076e+08	4.25661e+08	7.36387e+08	5.63515e+08	5.74241e+08	1315167562	3.5687e+08	4.5596e+08	3.32425e+08	3.53858e+08	4.89119e+08	4.46077e+08	5.82452e+08	5.04747e+08	1.90956e+08
High	Master Protein	P17987	T-complex protein 1 subunit alpha OS=Homo sapiens OX=9606 GN=TCP1 PE=1 SV=1	0	192.771	47	26	1885	26	556	60.3	6.11	387.75	394.47	98.42	683	632.24	663.87	21	21	14	23	21	20	6950	TCP1	E1P5B2; hsa:6950; P17987; Q15556; Q5TCM3	ENSG00000120438	16p11.2 proximal deletion syndrome	8	0	8.27088e+08	1116554809	1100337463	1122608527	1097711666	1021773846	1290121933	1038168803	1007870772	6.88742e+08	1093886192	1188634070	1538167694	1303967714	1342604866	1068988604	1074210264	1731349669
High	Master Protein	P00390	Glutathione reductase, mitochondrial OS=Homo sapiens OX=9606 GN=GSR PE=1 SV=2	0	192.387	46	20	2505	20	522	56.2	8.5	666.68	642.24	178.04	816.8	924.4	1084.74	16	17	13	14	15	19	2936	GSR	C8KIL8; C8KIL9; C8KIM0; D3DSV3; hsa:2936; P00390; Q7Z5C9; Q9NP63	ENSG00000104687	Glutathione metabolism; Selenium micronutrient network; Trans-sulfuration, one-carbon metabolism and related pathways; Nuclear receptors meta-pathway; NRF2 pathway; Amino acid metabolism; Oxidative stress response; Vitamin D-sensitive calcium signaling in depression; Sulfation biotransformation reaction; Metapathway biotransformation Phase I and II	10	0	9.81491e+08	1219194962	1355088743	1516530221	1045871366	1164950842	1188683447	1070267451	1553848059	7.81253e+08	1316417518	1405195868	1391816522	1174732007	1532654313	1050531062	1177563426	1040673292
High	Master Protein	Q13200	26S proteasome non-ATPase regulatory subunit 2 OS=Homo sapiens OX=9606 GN=PSMD2 PE=1 SV=3	0	192.325	26	22	1016	22	908	100.1	5.2	230.13	262.23	67.31	355.04	352.07	502.07	19	16	12	19	18	21	5708	PSMD2	B4DX07; B4DXY1; E7EW34; E9PCS3; hsa:5708; Q12932; Q13200; Q15321; Q53XQ4; Q96I12	ENSG00000175166	Proteasome degradation; Alzheimer's disease and miRNA effects; TNF-alpha signaling pathway; Parkin-ubiquitin proteasomal system pathway; Alzheimer's disease	64	0	4.40504e+08	6.54961e+08	4.96432e+08	5.36429e+08	3.0942e+08	3.92639e+08	3.60329e+08	5.36096e+08	551389674	4.45028e+08	4.57755e+08	4.01289e+08	3.43161e+08	6.69126e+08	5.67872e+08	439708443	496449716	3.63913e+08
High	Master Protein	P00387	NADH-cytochrome b5 reductase 3 OS=Homo sapiens OX=9606 GN=CYB5R3 PE=1 SV=3	0	191.528	61	17	1230	17	301	34.2	7.59	179.39	281.65	61.51	328.14	401.31	558.36	14	13	9	14	14	16	1727	CYB5R3	B1AHF2; B7Z7L3; hsa:1727; O75675; P00387; Q8TDL8; Q8WTS8; Q9UEN4; Q9UEN5; Q9UL55; Q9UL56	ENSG00000100243	Oxidation by cytochrome P450	4	0	4.07348e+08	4.80162e+08	1.6805e+08	5.87513e+08	1.9453e+08	4.88162e+08	6.38157e+08	4.31488e+08	5.99799e+08	656398935	3.48057e+08	2.29856e+08	2.21384e+08	6.74466e+08	5.78027e+08	8.13221e+08	3.61142e+08	4.28842e+08
High	Master Protein	Q8N0X4	Citramalyl-CoA lyase, mitochondrial OS=Homo sapiens OX=9606 GN=CLYBL PE=1 SV=2	0	191.525	51	19	1651	19	340	37.3	8.73	323.67	397.33	186.55	600.81	581.62	709.57	17	16	15	17	19	19	171425	CLYBL	hsa:171425; Q5W0F7; Q8N0X4; Q8TDH8	ENSG00000125246		0	0	1.07844e+08	5.58552e+08	7.15902e+08	6.56556e+08	1308891112	6.32097e+08	1047010009	7.25511e+08	3.96113e+08	4.87497e+08	7.78005e+08	1110077445	9.13787e+08	5.32776e+08	8.44557e+08	5.39168e+08	5.85764e+08	9.43811e+08
High	Master Protein	P04424	Argininosuccinate lyase OS=Homo sapiens OX=9606 GN=ASL PE=1 SV=4	0	191.292	40	22	1786	22	464	51.6	6.48	325.72	449.18	61.97	476.38	437.07	803.71	21	19	15	20	19	21	435	ASL	E7EMI0; E9PE48; hsa:435; P04424; Q6LDS5; Q96HS2	ENSG00000126522	Alanine and aspartate metabolism	2	0	1164468421	1063564016	1069193769	1411283120	1690879076	1035763039	1036559896	1578971825	9.07419e+08	1556451680	1427607713	1494219887	1304631951	1288677295	1384361378	7.07779e+08	1299330811	6.6321e+08
High	Master Protein	P62937	Peptidyl-prolyl cis-trans isomerase A OS=Homo sapiens OX=9606 GN=PPIA PE=1 SV=2	0	190.977	86	16	9471	14	165	18	7.81	1828.46	1900.51	805.2	2720.13	3310.17	3069.33	13	15	14	14	15	15	5478	PPIA	A8K220; hsa:5478; P05092; P62937; Q3KQW3; Q567Q0; Q6IBU5; Q96IX3; Q9BRU4; Q9BTY9; Q9UC61	ENSG00000196262	Prolactin signaling pathway	16	0	6758198412	5930496812	8166581826	11847142579	5181285396	4014419606	6278096008	6279561328	5489882186	2405139409	4885096498	7195037624	7637541302	7113651565	7679713978	7095579961	8680467958	6585775522
High	Master Protein	O43488	Aflatoxin B1 aldehyde reductase member 2 OS=Homo sapiens OX=9606 GN=AKR7A2 PE=1 SV=3	0	190.765	41	17	3483	11	359	39.6	7.17	981.45	1130.22	331.57	1388.29	1546.55	1601.94	14	14	13	14	16	16	8574	AKR7A2	hsa:8574; O43488; O75749; Q5TG63	ENSG00000053371	Aflatoxin B1 metabolism; Metapathway biotransformation Phase I and II	3	6	1888110036	1394591035	3047509130	3025944379	2450508604	1957016230	2337623151	2043378483	1145618131	11381410342	2202502915	2819395079	2896143359	1419780421	2123291410	9.91628e+08	1906191271	4455562508
High	Master Protein	P13073	Cytochrome c oxidase subunit 4 isoform 1, mitochondrial OS=Homo sapiens OX=9606 GN=COX4I1 PE=1 SV=1	0	190.192	59	18	3169	18	169	19.6	9.51	753.04	815.81	302.58	1007.73	1012.19	1460.46	14	14	12	16	18	17	1327	COX4I1	B2R4J2; D3DUM7; hsa:1327; P13073; Q6P666	ENSG00000131143	Electron transport chain: OXPHOS system in mitochondria; Nonalcoholic fatty liver disease; Mitochondrial complex IV assembly	6	0	3191133740	2973858145	4841545439	4580510653	5241690897	3252048284	2789906273	5066256392	2233015619	1577709941	3764659634	4253101480	3962128237	3961459738	4825167616	2965813875	2767125644	2151181079
High	Master Protein	Q04917	14-3-3 protein eta OS=Homo sapiens OX=9606 GN=YWHAH PE=1 SV=4	0	190.142	64	21	3168	15	246	28.2	4.84	491.43	584.31	262.48	1002.56	1058.71	980.85	16	17	14	18	21	19	7533	YWHAH	hsa:7533; Q04917	ENSG00000128245	Cell cycle; Myometrial relaxation and contraction pathways; Calcium regulation in cardiac cells; Sudden infant death syndrome (SIDS) susceptibility pathways	11	0	2610502338	3241134970	1891806286	1453249017	2187980837	3981597853	1028109522	3240346976	1613067104	9.10004e+08	2442264795	1636839253	2973573703	2476608997	2526515002	1913136608	3195488997	8.24292e+08
High	Master Protein	Q96HY7	2-oxoadipate dehydrogenase complex component E1 OS=Homo sapiens OX=9606 GN=DHTKD1 PE=1 SV=2	0	190.089	33	24	693	24	919	103	6.93	123.49	134.43	19.62	212.04	98.19	297.81	16	18	10	22	17	24	55526	DHTKD1	hsa:55526; Q68CU5; Q96HY7; Q9BUM8; Q9HCE2	ENSG00000181192		1	0	1.31862e+08	1.18809e+08	2.92227e+08	2.90721e+08	1.23266e+08	1.43171e+08	3.67083e+08	2.01336e+08	3.09281e+08	184327348	3.27912e+08	4.06683e+08	1.67744e+08	1.2165e+08	2.45068e+08	8.3357e+07	1.37781e+08	2.2197e+08
High	Master Protein	P20810-6	Isoform 6 of Calpastatin OS=Homo sapiens OX=9606 GN=CAST	0	189.993	35	21	1222	21	791	84.9	5.36	223.7	267.1	131.4	497.12	557.9	520.36	15	14	15	17	17	18		CAST	P20810-6			0	0	290880132	3.38301e+08	432942949	3.38603e+08	3.11939e+08	3.00706e+08	4.63913e+08	4.6798e+08	3.53575e+08	3.53092e+08	3.14708e+08	2.02231e+08	3.5879e+08	3.45217e+08	2.91718e+08	3.61124e+08	3.15406e+08	4.54574e+08
High	Master Protein	P26583	High mobility group protein B2 OS=Homo sapiens OX=9606 GN=HMGB2 PE=1 SV=2	0	189.798	40	15	1691	11	209	24	7.81	348.87	408.44	170.51	727.56	705.99	671.57	11	11	11	13	13	15	3148	HMGB2	B2R4K8; D3DP37; hsa:3148; P26583; Q5U072	ENSG00000164104	Retinoblastoma gene in cancer; Ectoderm differentiation; Ectoderm differentiation	4	0	5.87753e+08	7.78902e+08	1598087861	9.40983e+08	4.45371e+08	1302492707	1411866946	1267799240	1949289806	6.69241e+08	5.88924e+08	5.58302e+08	8.75218e+08	1092088181	7.92774e+08	1053386854	7.98857e+08	3.30213e+08
High	Master Protein	O43790	Keratin, type II cuticular Hb6 OS=Homo sapiens OX=9606 GN=KRT86 PE=1 SV=1	0	189.757	45	27	1319	4	486	53.5	5.66	256.48	247.11	18.28	539.31	161.18	47.59	24	25	15	27	23	19	3892	KRT86	hsa:3892; O43790; P78387	ENSG00000170442		2	6	2.02242e+08	2.7241e+08	2.02074e+08	2.27893e+08	1304186480	5.93732e+07	5.21599e+08	9.19071e+07	1.0681e+08	1.13971e+08	1.88373e+08	3.74862e+08	7.94059e+07	2548289876	179680761	2.30388e+08	1.44204e+08	9.14305e+07
High	Master Protein	P78527	DNA-dependent protein kinase catalytic subunit OS=Homo sapiens OX=9606 GN=PRKDC PE=1 SV=3	0	189.077	9	33	595	33	4128	468.8	7.12	87.33	99.9	10.07	254.22	150.62	205.58	19	18	8	30	15	21	5591	PRKDC	hsa:5591; P78527; P78528; Q13327; Q13337; Q14175; Q59H99; Q7Z611; Q96SE6; Q9UME3	ENSG00000253729	miRNA regulation of DNA damage response; Cell cycle; Retinoblastoma gene in cancer; Fas ligand pathway and stress induction of heat shock proteins; Pathways affected in adenoid cystic carcinoma; ATM signaling in development and disease ; Non-homologous end joining; Osteoblast differentiation and related diseases; DNA repair pathways, full network; DNA damage response	14	0	5.41836e+08	1066035530	4.39513e+08	7.01229e+08	9.43733e+08	6.54215e+08	355843802	9.68265e+08	297292697	1691796657	710054705	5.59167e+08	5.58917e+08	1116794339	1076710846	5.46191e+08	6.13636e+08	4.92199e+08
High	Master Protein	Q07954	Prolow-density lipoprotein receptor-related protein 1 OS=Homo sapiens OX=9606 GN=LRP1 PE=1 SV=2	0	188.731	8	32	581	32	4544	504.3	5.39	42.82	90.58	36.08	152.84	132.32	110.01	19	22	18	29	23	26	4035	LRP1	hsa:4035; Q07954; Q2PP12; Q86SW0; Q8IVG8	ENSG00000123384	Alzheimer's disease and miRNA effects; Regulation of Wnt / B-catenin signaling by small molecule compounds; Statin inhibition of cholesterol production; Familial hyperlipidemia type 1; Familial hyperlipidemia type 3; Familial hyperlipidemia type 4; Familial hyperlipidemia type 5; Alzheimer's disease; Cholesterol metabolism	11	0	353638690	3.71676e+08	3.11701e+08	3.56185e+08	2.53544e+08	331383165	2.35359e+08	3.45887e+08	2.0789e+08	1.71998e+08	405847792	2.08651e+08	3.51825e+08	3.9556e+08	4.31522e+08	4.97711e+08	4.26197e+08	3.72085e+08
High	Master Protein	P23381	Tryptophan--tRNA ligase, cytoplasmic OS=Homo sapiens OX=9606 GN=WARS1 PE=1 SV=2	0	188.353	50	22	989	22	471	53.1	6.23	246.49	283.89	70.69	482.31	447	564.11	12	16	13	19	20	22	7453	WARS1	A6NGN1; A6NID3; hsa:7453; P23381; P78535; Q502Y0; Q53XB6; Q9UDI5; Q9UDL3	ENSG00000140105	Photodynamic therapy-induced unfolded protein response; Amino acid metabolism	3	0	2.59447e+08	2.74528e+08	2.09847e+08	4.27493e+08	2.9374e+08	2.20418e+08	4.16403e+08	4.22362e+08	5.56113e+08	2.40086e+08	2.74213e+08	4.66692e+08	6.52249e+08	5.97123e+08	4.59022e+08	3.62197e+08	367559727	3.89391e+08
High	Master Protein	P05026	Sodium/potassium-transporting ATPase subunit beta-1 OS=Homo sapiens OX=9606 GN=ATP1B1 PE=1 SV=1	0	188.164	50	21	2239	21	303	35	8.53	453.9	469.94	166.34	724.29	669.37	825.98	20	16	13	18	18	20	481	ATP1B1	hsa:481; P05026; Q5TGZ3	ENSG00000143153	Proximal tubule transport; Calcium regulation in cardiac cells	6	0	1894449112	1802887864	2401135609	3442975486	2830067168	2362827419	2399183633	2897102668	1586034093	1985858193	1956610421	1656342925	1307292713	2317677179	2275823990	2606331677	1736714453	1436148545
High	Master Protein	P08123	Collagen alpha-2(I) chain OS=Homo sapiens OX=9606 GN=COL1A2 PE=1 SV=7	0	187.712	13	18	6477	18	1366	129.2	8.95	1884.6	2427.87	1062.41	3685.24	2634.48	2647.62	16	15	15	15	13	15	1278	COL1A2	hsa:1278; P02464; P08123; Q13897; Q13997; Q13998; Q14038; Q14057; Q15177; Q15947; Q16480; Q16511; Q7Z5S6; Q9UEB6; Q9UEF9; Q9UM83; Q9UMI1; Q9UML5; Q9UMM6; Q9UPH0	ENSG00000164692	miRNA targets in ECM and membrane receptors; Focal adhesion; Focal adhesion: PI3K-Akt-mTOR-signaling pathway; PI3K-Akt signaling pathway; Inflammatory response pathway; IL-18 signaling pathway; Type I collagen synthesis in the context of osteogenesis imperfecta; Angiotensin II receptor type 1 pathway; CCL18 signaling pathway; NRP1-triggered signaling pathways in pancreatic cancer	31	0	7643688434	5994641548	10102646794	3695754994	1881478529	16919776951	7742714326	13836843572	12044298318	2837094692	9353576009	3278700785	5644758895	1895869600	4171869915	6661721344	4702736812	3549275704
High	Master Protein	Q86WA6	Valacyclovir hydrolase OS=Homo sapiens OX=9606 GN=BPHL PE=1 SV=1	0	187.678	56	20	1918	20	291	32.5	9.14	241.48	464.94	129.97	344.57	404.52	1034.7	13	14	14	19	15	19	670	BPHL	hsa:670; Q00306; Q13855; Q3KP51; Q86WA6	ENSG00000137274		1	0	502129621	1.31781e+08	9.92636e+08	7.21879e+08	426577166	3.59167e+08	625935608	5.09071e+08	5.48979e+08	2.93205e+08	6.41463e+08	8.82029e+08	2.81986e+08	152335476	4.59911e+08	8.39005e+07	3.10901e+08	254507787
High	Master Protein	P47756	F-actin-capping protein subunit beta OS=Homo sapiens OX=9606 GN=CAPZB PE=1 SV=5	0	187.57	51	19	2911	19	272	30.6	6	766.7	831.77	261.97	1115.68	1266.45	1280.47	18	18	13	17	17	19	832	CAPZB	hsa:832; P47756; Q32Q68; Q5U0L4; Q8TB49; Q9NUC4	ENSG00000077549	VEGFA-VEGFR2 signaling	9	0	1485392681	1916796623	1572799168	1674845489	2119707543	1816214213	1986448313	1837142139	1664743204	1266256033	1989929903	1889068007	2536381882	2231188570	2004729679	1973831125	2127773417	1402062664
High	Master Protein	P50053	Ketohexokinase OS=Homo sapiens OX=9606 GN=KHK PE=1 SV=2	0	187.085	60	19	3567	5	298	32.5	6.32	849.61	1020.97	193.99	1055.99	1295.37	1901.82	14	13	12	15	14	15	3795	KHK	hsa:3795; P50053; Q6IBK2; Q99532; Q9BRJ3; Q9UMN1	ENSG00000138030	Disorders of fructose metabolism; Polyol pathway	4	14	2586276514	1120096259	2695994518	2972465646	1638172092	1279903080	2443583511	1603975358	1768557246	1618231148	1977172735	3022166933	1254683752	1039647990	1760183786	7.3155e+08	1203961016	6.53012e+08
High	Master Protein	P05387	60S acidic ribosomal protein P2 OS=Homo sapiens OX=9606 GN=RPLP2 PE=1 SV=1	0	186.852	83	10	1115	10	115	11.7	4.54	283.01	389.96	227.6	598.09	628.75	736.65	7	7	8	9	9	8	6181	RPLP2	hsa:6181; P05387; Q6FG96	ENSG00000177600	VEGFA-VEGFR2 signaling; Cytoplasmic ribosomal proteins; Opioid receptor pathways	16	0	8.19147e+08	5.38704e+08	4.96494e+08	6.91903e+08	1.54414e+08	2.09682e+08	3.61519e+08	4.97596e+08	552662852	8.10378e+07	4.69527e+08	2.34391e+08	3.33355e+08	9.55938e+08	8.92682e+08	796996320	5.6055e+08	7.30654e+08
High	Master Protein	P80723	Brain acid soluble protein 1 OS=Homo sapiens OX=9606 GN=BASP1 PE=1 SV=2	0	186.679	89	19	1591	19	227	22.7	4.63	297.75	373.16	300.14	640.62	546.03	733.8	12	13	17	15	13	17	10409	BASP1	B4DJA8; D3DTD5; hsa:10409; O43596; P80723; Q5U0S0; Q9BWA5	ENSG00000176788		1	0	4.51281e+08	3.95223e+08	481431650	3.60523e+08	2.83158e+08	4.08226e+08	391196374	9.73042e+08	6.20122e+08	2.77237e+08	2.93213e+08	1.52761e+08	2.75819e+08	4.56933e+08	4.3088e+08	5.39194e+08	3.38702e+08	2.03426e+08
High	Master Protein	P05455	Lupus La protein OS=Homo sapiens OX=9606 GN=SSB PE=1 SV=2	0	186.149	42	24	1086	24	408	46.8	7.12	144.01	164.38	59.96	272.04	325.54	380.91	17	16	12	19	20	22	6741	SSB	hsa:6741; P05455; Q15367; Q53XJ4	ENSG00000138385		2	0	4.42908e+08	567951563	5.32834e+08	5.74819e+08	4.06911e+08	6.00694e+08	4.54384e+08	606864789	1015146129	5.91613e+08	4.6099e+08	5.3165e+08	6.73651e+08	5.27311e+08	5.61034e+08	1437386596	5.36168e+08	3.8653e+08
High	Master Protein	Q9UJS0	Electrogenic aspartate/glutamate antiporter SLC25A13, mitochondrial OS=Homo sapiens OX=9606 GN=SLC25A13 PE=1 SV=2	0	185.879	37	23	1676	17	675	74.1	8.62	306.52	407.62	74.59	578.23	505.7	894.99	20	21	13	21	19	22	10165	SLC25A13	hsa:10165; O14566; O14575; Q546F9; Q9NZW1; Q9UJS0; Q9UNI7	ENSG00000004864		3	6	4.48997e+08	4.60556e+08	4.15703e+08	9.47481e+08	1139530230	8.10227e+08	1182516663	6.73325e+08	5.40182e+08	6.7685e+08	7.095e+08	6.8006e+08	391240675	5.13831e+08	7.08927e+08	3.80517e+08	5.36598e+08	1706604392
High	Master Protein	P07996	Thrombospondin-1 OS=Homo sapiens OX=9606 GN=THBS1 PE=1 SV=2	0	185.39	22	27	1413	24	1170	129.3	4.94	281.15	338.93	72.88	502.51	605.91	514.42	24	26	17	24	26	24	7057	THBS1	A8K6H4; B4E3J7; B9EGH6; hsa:7057; P07996; Q15667; Q59E99	ENSG00000137801	Complement system; Bladder cancer; Apoptosis-related network due to altered Notch3 in ovarian cancer; miRNA targets in ECM and membrane receptors; Focal adhesion; Focal adhesion: PI3K-Akt-mTOR-signaling pathway; PI3K-Akt signaling pathway; Inflammatory response pathway; Male infertility; TGF-beta receptor signaling in skeletal dysplasias; p53 transcriptional gene network; TGF-beta receptor signal…	19	3	1475874076	7.38641e+08	8.42456e+08	8.93482e+08	3.89509e+08	7.00738e+08	3.39134e+08	5.78685e+08	6.94166e+08	4.79531e+08	3.96962e+08	2.70946e+08	4.10603e+08	6.35482e+08	1165436545	1603694136	6.6823e+08	1433670917
High	Master Protein	Q5T5P2	Sickle tail protein homolog OS=Homo sapiens OX=9606 GN=KIAA1217 PE=1 SV=2	0	185.133	22	34	682	34	1943	214	7.06	93.61	97.82	32.29	172.21	165.93	168.6	19	19	17	27	26	25	56243	KIAA1217	A5LHW9; A6NLF3; A6PVQ5; A6PVQ6; A6PVQ7; B9EGK4; hsa:56243; Q4KMG4; Q5T5P2; Q5T5P3; Q5T7H3; Q6MZZ6; Q6ZUI4; Q8WV45; Q9NSR2; Q9ULK3	ENSG00000120549		0	0	2.31912e+08	2.40561e+08	2.84255e+08	3.20354e+08	4.22734e+08	280875070	3.12951e+08	3.9049e+08	295070595	1.25838e+08	3.93522e+08	3.24247e+08	3.68424e+08	2.90352e+08	3.03989e+08	2.31535e+08	3.44221e+08	2.05121e+08
High	Master Protein	Q15417	Calponin-3 OS=Homo sapiens OX=9606 GN=CNN3 PE=1 SV=1	0	184.89	46	14	1968	13	329	36.4	6.05	546.95	556.98	233.35	927.44	988.36	930.49	9	11	10	13	12	13	1266	CNN3	B4DFK6; B4DP09; F8WA86; hsa:1266; Q15417; Q6FHA7	ENSG00000117519		0	1	2608152232	3038514214	2114534192	2997115571	1833694015	2106761043	2905660447	2523638960	2965789413	1794314517	2318544384	2667340431	3630149456	3116878070	3485052698	2957075987	3916251057	6.83675e+08
High	Master Protein	P04004	Vitronectin OS=Homo sapiens OX=9606 GN=VTN PE=1 SV=1	0	184.789	31	15	4892	15	478	54.3	5.8	1286.42	1639.02	637.77	1992.15	1974.97	1603.55	13	12	11	14	14	14	7448	VTN	B2R7G0; hsa:7448; P01141; P04004; Q9BSH7	ENSG00000109072	Primary focal segmental glomerulosclerosis (FSGS); Complement system; Focal adhesion; Focal adhesion: PI3K-Akt-mTOR-signaling pathway; PI3K-Akt signaling pathway; Epithelial to mesenchymal transition in colorectal cancer; Inflammatory response pathway; Complement system in neuronal development and plasticity	13	0	3488448502	2350660965	3766473727	2182452516	5.20404e+08	6.66958e+08	1366792470	1480168064	1141308289	1066019286	1022506328	1793210950	1750826296	1278557870	1091149269	2799186514	3209142009	1113716158
High	Master Protein	Q9NZN3	EH domain-containing protein 3 OS=Homo sapiens OX=9606 GN=EHD3 PE=1 SV=2	0	184.774	49	25	984	12	535	60.8	6.57	205.35	227.61	30.33	258.09	267.95	428.66	17	16	5	20	19	21	30845	EHD3	B4DFR5; D6W574; hsa:30845; Q8N514; Q9NZB3; Q9NZN3	ENSG00000013016	Ciliary landscape	2	5	2.43429e+08	2.5939e+08	1.29417e+08	4.04258e+08	2.44048e+08	2.22276e+08	5.58915e+08	2.2075e+08	186312270	2.57462e+08	2.87712e+08	3.44105e+08	3.26428e+08	2.55349e+08	2.19937e+08	2.40426e+08	2.21222e+08	1.42902e+08
High	Master Protein	Q92947	Glutaryl-CoA dehydrogenase, mitochondrial OS=Homo sapiens OX=9606 GN=GCDH PE=1 SV=1	0	184.152	35	12	1449	12	438	48.1	8.06	322.58	531.84	92.27	548.5	514.64	727.39	8	8	8	10	10	10	2639	GCDH	A8K2Z2; hsa:2639; O14719; Q92947	ENSG00000105607	Fatty acid beta-oxidation; Tryptophan metabolism	3	0	4.71995e+08	3.15698e+08	6.37418e+08	1073332336	6.67874e+08	3.69781e+08	6.48076e+08	7.2453e+08	6.05953e+08	408794573	8.58639e+08	1205706033	768014299	4.15526e+08	6.50363e+08	5.23907e+08	3.65312e+08	5.95197e+08
High	Master Protein	P35222	Catenin beta-1 OS=Homo sapiens OX=9606 GN=CTNNB1 PE=1 SV=1	0	183.624	34	19	1339	17	781	85.4	5.86	247.79	326.04	64.88	453.44	403.1	558.4	16	16	10	16	17	19	1499	CTNNB1	A8K1L7; hsa:1499; P35222; Q8NEW9; Q8NI94; Q9H391	ENSG00000168036	Androgen receptor signaling pathway; MicroRNAs in cardiomyocyte hypertrophy; Heart development; TNF-related weak inducer of apoptosis (TWEAK) signaling pathway; Alzheimer's disease and miRNA effects; Neural crest differentiation; Arrhythmogenic right ventricular cardiomyopathy; Pathogenic Escherichia coli infection; Corticotropin-releasing hormone signaling pathway; Adipogenesis; Gastric cancer n…	90	0	6.9236e+08	9.4139e+08	6.2726e+08	8.55102e+08	1760247653	1038996099	1000557428	9.59797e+08	4.69627e+08	7.47206e+08	9.50181e+08	9.33476e+08	8.96809e+08	8.65543e+08	9.28917e+08	4.84867e+08	791831936	5.82155e+08
High	Master Protein	P04843	Dolichyl-diphosphooligosaccharide--protein glycosyltransferase subunit 1 OS=Homo sapiens OX=9606 GN=RPN1 PE=1 SV=1	0	183.402	53	29	1748	29	607	68.5	6.38	326.33	377.03	114.53	788.61	608.24	681.55	22	22	18	28	28	24	6184	RPN1	B2R5Z0; D3DNB6; hsa:6184; P04843; Q68DT1	ENSG00000163902	Proteasome degradation; N-glycan biosynthesis	5	0	4.34911e+08	543583136	5.21695e+08	6.28347e+08	4.52472e+08	6.4735e+08	6.25698e+08	7.44995e+08	1029294135	9046428579	6.26988e+08	4.52271e+08	5.55927e+08	8.92901e+08	9.24357e+08	9.22553e+08	6.36981e+08	3151419501
High	Master Protein	Q00577	Transcriptional activator protein Pur-alpha OS=Homo sapiens OX=9606 GN=PURA PE=1 SV=2	0	182.994	44	16	987	15	322	34.9	6.44	100.71	115.64	52.28	173.57	243.75	362.51	13	13	11	16	15	15	5813	PURA	hsa:5813; Q00577	ENSG00000185129	Exercise-induced circadian regulation	1	0	4.26958e+08	4.36186e+08	4.46115e+08	6.73982e+08	326156908	2.09233e+08	3.9401e+08	2.78859e+08	2.45056e+08	2.9032e+08	4.38843e+08	4.86408e+08	4.68052e+08	4.7945e+08	4.72591e+08	3.32867e+08	4.55217e+08	3.05725e+08
High	Master Protein	P16219	Short-chain specific acyl-CoA dehydrogenase, mitochondrial OS=Homo sapiens OX=9606 GN=ACADS PE=1 SV=1	0	182.964	49	19	2217	19	412	44.3	7.99	415	624.32	175.46	760.75	697.97	1075.53	15	15	12	16	16	18	35	ACADS	hsa:35; P16219; P78331	ENSG00000122971	Fatty acid beta-oxidation; Mitochondrial long chain fatty acid beta-oxidation; IL-18 signaling pathway; Mitochondrial fatty acid oxidation disorders	6	0	1847231656	1561290581	1571863188	2286769522	1833603188	1321081940	1696665789	1306698382	1023176282	1492948469	2024781899	2702890300	2226981677	1831688628	2505810840	1402737974	1982163150	1221989746
High	Master Protein	Q9H223	EH domain-containing protein 4 OS=Homo sapiens OX=9606 GN=EHD4 PE=1 SV=1	0	182.833	52	24	1734	19	541	61.1	6.76	469.05	559.97	136.5	808.47	563.5	769.46	20	19	16	19	23	21	30844	EHD4	hsa:30844; Q9H223; Q9HAR1; Q9NZN2	ENSG00000103966		0	1	5.76455e+08	7.79632e+08	3.34962e+08	9.56572e+08	9.44702e+08	4.81226e+08	8.17445e+08	8.42984e+08	3.4893e+08	3.82155e+08	8.12156e+08	1015762167	725385119	9.46655e+08	8.00882e+08	9.81471e+08	932265725	9.22663e+08
High	Master Protein	Q93050-1	Isoform 2 of V-type proton ATPase 116 kDa subunit a 1 OS=Homo sapiens OX=9606 GN=ATP6V0A1	0	182.593	25	22	1076	21	831	95.7	6.65	196.64	229.83	30.99	359.32	292.87	511.11	18	18	8	17	21	20		ATP6V0A1	Q93050-1			0	1	1.93014e+08	2.61009e+08	2.13181e+08	6.28425e+08	2.43533e+08	6.5847e+08	5.8989e+08	293612621	9.60477e+08	4.26164e+08	394500058	4.0338e+08	1.99596e+08	4.19655e+08	4.44827e+08	4.1366e+08	1.92822e+08	2.70743e+08
High	Master Protein	Q9Y6N5	Sulfide:quinone oxidoreductase, mitochondrial OS=Homo sapiens OX=9606 GN=SQOR PE=1 SV=1	0	182.565	50	23	1348	23	450	49.9	9.11	360.94	454.3	118.75	572.36	546.33	865.96	16	17	15	17	17	23	58472	SQOR	hsa:58472; Q9UQM8; Q9Y6N5	ENSG00000137767		1	0	5.22257e+08	4.8981e+08	5.6331e+08	8.84629e+08	5.74572e+08	429238709	6.06728e+08	4.97873e+08	3.07245e+08	4.27649e+08	4.87254e+08	7.6905e+08	7.121e+08	705093261	9.1692e+08	5.81062e+08	434313877	3.26494e+08
High	Master Protein	P55786	Puromycin-sensitive aminopeptidase OS=Homo sapiens OX=9606 GN=NPEPPS PE=1 SV=2	0	181.956	31	28	1218	28	919	103.2	5.72	204.6	211	58.75	345.05	309.85	487.94	23	21	15	23	27	24	9520	NPEPPS	B7Z463; hsa:9520; P55786; Q6P145; Q9NP16; Q9UEM2	ENSG00000141279		1	0	8.58412e+08	1011800453	9.31869e+08	1167395744	9.96495e+08	830938674	4.1981e+08	9.86474e+08	6.35224e+08	8.05767e+08	8.50051e+08	7.74834e+08	7.22707e+08	1134155042	1104443508	9.74898e+08	8.31091e+08	7.91847e+08
High	Master Protein	P26640	Valine--tRNA ligase OS=Homo sapiens OX=9606 GN=VARS1 PE=1 SV=4	0	181.843	27	29	1065	29	1264	140.4	7.59	203.07	263.61	43.11	410.45	328.65	399.33	20	22	14	25	23	23	7407	VARS1	B0V1N1; B4DZ61; hsa:7407; P26640; Q5JQ90; Q96E77; Q9UQM2	ENSG00000096171; ENSG00000204394; ENSG00000224264; ENSG00000226589; ENSG00000231116	Amino acid metabolism	2	0	211770269	4.02196e+08	1.93026e+08	322548298	2.29896e+08	3.32426e+08	2.78637e+08	3.43313e+08	4.16122e+08	2.63105e+08	250092052	2.68816e+08	2.17652e+08	5.2279e+08	5.13953e+08	4.95171e+08	3.69649e+08	4.56895e+08
High	Master Protein	O60504	Vinexin OS=Homo sapiens OX=9606 GN=SORBS3 PE=1 SV=2	0	181.784	45	22	1159	8	671	75.3	9.45	237.99	404.58	128.77	359.31	386.38	489.34	17	20	18	19	19	20	10174	SORBS3	hsa:10174; O60504; Q5BJE4; Q6NX54; Q96FY4; Q9UQE4	ENSG00000120896		1	15	5.02645e+08	3.9951e+08	5.15301e+08	4.83272e+08	1.5443e+08	2.76971e+08	4.66429e+08	4.85316e+08	3.60057e+08	5.61332e+08	3.95593e+08	4.3315e+08	3.91083e+08	2.52622e+08	4.66175e+08	3.38199e+08	5.73613e+08	2.62334e+08
High	Master Protein	P49821	NADH dehydrogenase [ubiquinone] flavoprotein 1, mitochondrial OS=Homo sapiens OX=9606 GN=NDUFV1 PE=1 SV=4	0	181.373	44	20	1583	20	464	50.8	8.21	229.53	308.9	61.71	336.43	329.58	601.35	16	16	12	17	17	18	4723	NDUFV1	hsa:4723; O60924; O60940; P49821; Q16104; Q6IBR3; Q96BF8; Q96HS7	ENSG00000167792	Electron transport chain: OXPHOS system in mitochondria; Nonalcoholic fatty liver disease; Oxidative phosphorylation	5	0	659770340	4.20331e+08	1075915106	1214557491	6.62717e+08	605447463	890431692	7.27707e+08	1056253089	5.5881e+08	6.22293e+08	1280555694	6.28669e+08	4.41198e+08	6.95188e+08	340202836	4.14187e+08	3.61933e+08
High	Master Protein	P11766	Alcohol dehydrogenase class-3 OS=Homo sapiens OX=9606 GN=ADH5 PE=1 SV=4	0	181.302	28	17	2155	17	374	39.7	7.49	323.67	461.07	84.88	511.77	556.17	733.9	15	15	12	16	17	16	128	ADH5	hsa:128; P11766; Q6FHR2	ENSG00000197894	Folate-alcohol and cancer pathway hypotheses; Amino acid metabolism	3	0	9.37757e+08	8.54365e+08	9.11977e+08	1884936241	1907876593	1517683608	1171306402	1277986602	1274429626	8.35212e+08	8.36334e+08	1384054886	1108746319	8.95993e+08	1019914789	8.47559e+08	940378777	5.30096e+08
High	Master Protein	Q99832	T-complex protein 1 subunit eta OS=Homo sapiens OX=9606 GN=CCT7 PE=1 SV=2	0	181.285	45	21	1430	21	543	59.3	7.65	273.98	260.43	64.52	389.93	470.86	447.26	15	14	13	17	20	19	10574	CCT7	A8K7E6; A8MWI8; B7WNW9; B7Z4T9; B7Z4Z7; hsa:10574; O14871; Q6FI26; Q99832	ENSG00000135624	VEGFA-VEGFR2 signaling; 16p11.2 proximal deletion syndrome	9	0	8.56115e+08	1170912716	6.84093e+08	9.97141e+08	9.63429e+08	8.00457e+08	1022052593	6.11108e+08	4.22639e+08	1079308031	1048596815	1264333561	1372353392	1456312875	1501560757	1154968228	1150449554	9.15385e+08
High	Master Protein	P27348	14-3-3 protein theta OS=Homo sapiens OX=9606 GN=YWHAQ PE=1 SV=1	0	181.081	64	23	4166	16	245	27.7	4.78	584.58	697.34	283.31	1141.83	1182.38	1244.92	20	17	14	22	22	19	10971	YWHAQ	D6W4Z5; hsa:10971; P27348; Q567U5; Q5TZU8; Q9UP48	ENSG00000134308	Cell cycle; Pathogenic Escherichia coli infection; Primary focal segmental glomerulosclerosis (FSGS); IL-3 signaling pathway; Myometrial relaxation and contraction pathways; Mechanoregulation and pathology of YAP/TAZ via Hippo and non-Hippo mechanisms; Hippo-YAP signaling; Leukocyte-intrinsic Hippo pathway functions; Hepatitis B infection; Opioid receptor pathways; Calcium regulation in cardiac c…	20	3	1661034193	1912639124	1357481182	1251718139	3077711405	2285039493	2451038817	2244952007	1862243457	3048207862	1688679583	2069168285	2532393350	1840077097	1579511625	1138321371	1654853115	1326346899
High	Master Protein	Q6JQN1	Acyl-CoA dehydrogenase family member 10 OS=Homo sapiens OX=9606 GN=ACAD10 PE=1 SV=1	0	180.653	28	24	499	24	1059	118.8	8.06	98.17	177.61	25.02	130.45	80.43	348.08	16	17	7	19	14	23	80724	ACAD10	G3XAJ0; hsa:80724; Q6JQN1; Q8N828; Q8NAP2; Q96BX5	ENSG00000111271		1	0	1.67581e+08	135863743	188002636	3.01158e+08	1.54199e+08	1.5611e+08	1.87088e+08	2.0851e+08	2.09404e+08	1.68804e+08	1.48227e+08	1.67472e+08	1.26423e+08	1.41821e+08	1.78646e+08	4.81377e+07	7.18652e+07	1.02904e+08
High	Master Protein	P50895	Basal cell adhesion molecule OS=Homo sapiens OX=9606 GN=BCAM PE=1 SV=2	0	180.335	37	18	1879	18	628	67.4	5.81	511.05	599.24	146.65	839.95	691.67	907.04	16	16	14	16	15	18	4059	BCAM	A8MYF9; A9YWT5; A9YWT6; hsa:4059; P50895; Q86VC7	ENSG00000187244		0	0	1336361097	1189716363	4.93621e+08	1004380283	6.94387e+08	9.83774e+08	1359270128	1186955880	9.3421e+08	8.53766e+08	7.80727e+08	8.35518e+08	7.4134e+08	1120094919	1010187868	1176976751	1025380824	8.7463e+08
High	Master Protein	P01876	Immunoglobulin heavy constant alpha 1 OS=Homo sapiens OX=9606 GN=IGHA1 PE=1 SV=2	0	180.128	42	18	4547	10	353	37.6	6.51	1062.9	1375.63	1047.46	2577.66	1472.98	779.75	12	14	14	18	14	13						0	8	14573767733	22211367773	5529552037	2102391308	2029574804	10845757628	3958822693	8494688236	8225517839	3184047940	4819049724	2893291735	13008964537	20982740017	5100960088	34892247729	18881915649	8002385262
High	Master Protein	Q9Y617	Phosphoserine aminotransferase OS=Homo sapiens OX=9606 GN=PSAT1 PE=1 SV=2	0	180.127	46	22	2617	22	370	40.4	7.66	633.36	703.25	125.07	878.6	848.16	975.5	20	18	13	20	21	22	29968	PSAT1	hsa:29968; Q5T7G5; Q5T7G6; Q96AW2; Q9BQ12; Q9Y617	ENSG00000135069	Trans-sulfuration, one-carbon metabolism and related pathways; Clear cell renal cell carcinoma pathways; Metabolic reprogramming in colon cancer; Male infertility; Neuroinflammation and glutamatergic signaling; Amino acid metabolism in triple-negative breast cancer cells	7	0	1763109278	1128923017	1712994508	2002412311	2061609546	1497342471	1665007023	1207658216	1580142585	1122209792	1880347223	3005383604	1228355865	1433064679	1711479983	8.49787e+08	1588157183	1395998587
High	Master Protein	Q16795	NADH dehydrogenase [ubiquinone] 1 alpha subcomplex subunit 9, mitochondrial OS=Homo sapiens OX=9606 GN=NDUFA9 PE=1 SV=2	0	180.022	47	17	1365	17	377	42.5	9.8	263.14	387.8	66.41	402.88	334.19	689.45	15	17	11	16	16	17	4704	NDUFA9	hsa:4704; Q14076; Q16795; Q2NKX0	ENSG00000139180	Electron transport chain: OXPHOS system in mitochondria; Ciliary landscape; Nonalcoholic fatty liver disease; Oxidative phosphorylation	6	0	4.05688e+08	440434237	3.90806e+08	8.38652e+08	4.59935e+08	7.48532e+08	6.22183e+08	4.11788e+08	8.03861e+08	6.29982e+08	511065153	6.03545e+08	5.14187e+08	4.59555e+08	6.80388e+08	5.54088e+08	4.52939e+08	587582621
High	Master Protein	Q9UIJ7	GTP:AMP phosphotransferase AK3, mitochondrial OS=Homo sapiens OX=9606 GN=AK3 PE=1 SV=4	0	179.933	74	23	1253	23	227	25.6	9.16	244.67	243.53	115.55	406.32	418.76	542.93	15	15	13	20	17	20	50808	AK3	B4DP58; D3DRI1; E7ET30; hsa:50808; Q5VYW6; Q9H576; Q9HC01; Q9NPB4; Q9UIJ7	ENSG00000147853		1	0	9.08851e+08	5.04529e+08	1344939997	7.19604e+08	7.30422e+08	1461659057	8.89311e+08	8.63169e+08	4.82856e+08	3.25637e+08	1292474577	9.78355e+08	1105412777	5.79342e+08	9.5122e+08	2.9824e+08	6.91046e+08	3.52939e+08
High	Master Protein	P02730	Band 3 anion transport protein OS=Homo sapiens OX=9606 GN=SLC4A1 PE=1 SV=3	0	179.471	23	18	596	18	911	101.7	5.19	227.07	250.37	19.83	187.1	164.28	281.14	15	14	6	10	11	15	6521	SLC4A1	G4V2I6; hsa:6521; P02730; P78487; Q1ZZ45; Q4KKW9; Q4VB84; Q9UCY7; Q9UDJ1	ENSG00000004939		4	0	1867092879	9.16675e+08	2.74539e+08	138616500	1909683260	9.01557e+08	2.888e+08	1565450056	1.80214e+08	1535170683	1873656081	657509820	407938579	8.81495e+08	1185673631	3.20428e+08	3.15228e+08	2.42735e+08
High	Master Protein	P34897	Serine hydroxymethyltransferase, mitochondrial OS=Homo sapiens OX=9606 GN=SHMT2 PE=1 SV=3	0	179.112	46	24	1711	23	504	56	8.53	302.51	472.88	115.03	545.12	538.82	808.97	20	20	15	20	21	24	6472	SHMT2	B7Z9F1; E7EQ19; E7EU43; hsa:6472; O00740; P34897; Q8N1A5	ENSG00000182199	Glycine metabolism; Vitamin B12 metabolism; Folate metabolism; One-carbon metabolism; Trans-sulfuration, one-carbon metabolism and related pathways; Clear cell renal cell carcinoma pathways; Metabolic reprogramming in colon cancer; Neuroinflammation and glutamatergic signaling	10	0	1900089849	1921030108	1857995991	1928574774	3218077318	1586259744	2080569324	2301301118	1183190032	3669919287	3064134417	3815315729	2586589973	1295713277	2299955649	1143546646	1170190720	9.72282e+08
High	Master Protein	Q9BTZ2	Dehydrogenase/reductase SDR family member 4 OS=Homo sapiens OX=9606 GN=DHRS4 PE=1 SV=3	0	178.823	72	22	2273	3	278	29.5	8.56	434.19	565.31	182.09	787.68	653.93	900.69	13	15	15	17	19	18	10901	DHRS4	B2RB10; B7WNS9; D3YTB8; E2QRL8; hsa:10901; O95162; Q20CR0; Q2LC19; Q2LE81; Q58IU4; Q6E0Y1; Q6UWU3; Q71UQ6; Q8TD03; Q9BTZ2; Q9H3N5; Q9NV08	ENSG00000157326; ENSG00000284807		2	20	1102381087	7.19715e+08	2092838129	1829667131	1253886800	8.62122e+08	2341798725	1001217638	1621111433	6.80138e+08	1342578458	1609691038	1748119987	2.92764e+08	1254957346	3.81388e+08	5.32319e+08	9.36995e+08
High	Master Protein	Q8NBS9	Thioredoxin domain-containing protein 5 OS=Homo sapiens OX=9606 GN=TXNDC5 PE=1 SV=2	0	178.472	39	23	2372	23	432	47.6	5.97	277.71	399.07	254.87	736.11	686.89	667.5	21	20	20	22	21	22	81567	TXNDC5	B2RDM2; hsa:81567; Q5TCQ0; Q8NBS9; Q8ND33; Q8TCT2; Q9BVH9	ENSG00000239264	VEGFA-VEGFR2 signaling	4	0	1380004527	1472350087	1208583409	1558250904	8.10847e+08	1657852967	7.34225e+08	1474843706	1895993612	1578991934	1374467547	8.13897e+08	1826418700	1786440809	1665665055	1796669970	1582804423	4171331594
High	Master Protein	P01834	Immunoglobulin kappa constant OS=Homo sapiens OX=9606 GN=IGKC PE=1 SV=2	0	178.43	91	12	7966	12	107	11.8	6.52	2178.47	2858.03	1538.86	4816.32	3724.81	2609.84	9	9	10	10	10	9		IGKC	A0A075B6H6; A0A087X130; P01834			19	0	9115448784	5859324003	8543558995	3382420056	1011109942	1939877720	2749677316	3335189494	1678168092	1275526392	3854565955	1222742942	3154354864	15201374975	3770935126	5812450514	5017767933	26847881227
High	Master Protein	P40227	T-complex protein 1 subunit zeta OS=Homo sapiens OX=9606 GN=CCT6A PE=1 SV=3	0	178.365	40	24	1622	18	531	58	6.68	210.42	246.04	68.95	486.38	420.05	478.99	21	18	15	23	22	22	908	CCT6A	A6NCD2; hsa:908; P40227; Q3KP28; Q75LP4; Q96S46	ENSG00000146731	16p11.2 proximal deletion syndrome	7	7	1341969569	1588213473	8.72804e+08	1423673032	1367260563	1457710843	1003131009	1627881930	9.53473e+08	7.85707e+08	1442103751	1502627220	1693386909	1803721158	1877922851	1004422508	1355998461	2145395139
High	Master Protein	Q16775	Hydroxyacylglutathione hydrolase, mitochondrial OS=Homo sapiens OX=9606 GN=HAGH PE=1 SV=2	0	178.271	59	17	2238	17	308	33.8	8.12	451.96	533.88	195.54	662.58	724	1080.29	12	13	9	12	15	16	3029	HAGH	A8K290; B4DP33; B4DRA7; E7EN93; hsa:3029; Q16775	ENSG00000063854		0	0	9.57705e+08	6.18971e+08	2220975141	2504656915	1448586316	1486884569	1767853748	1880172649	2179579025	1003697764	1093399076	1338493601	9.67984e+08	538721304	9.95646e+08	5.38927e+08	5.88315e+08	564838067
High	Master Protein	P78386	Keratin, type II cuticular Hb5 OS=Homo sapiens OX=9606 GN=KRT85 PE=1 SV=1	0	178.174	45	28	1196	9	507	55.8	6.55	227.37	171.84	16.18	433.93	150.15	41	21	24	12	27	19	16	3891	KRT85	hsa:3891; P78386; Q9NSB1	ENSG00000135443		2	18	1.47795e+08	8.24277e+08	3.46361e+08	1.41215e+08	4455873370	3.46928e+08	7.53851e+08	2.21722e+08	4.15445e+08	5.06354e+08	3.85805e+08	1886961717	2.91933e+08	3442200435	3.43639e+08	5.38951e+08	3.68236e+08	1.74451e+08
High	Master Protein	O14974	Protein phosphatase 1 regulatory subunit 12A OS=Homo sapiens OX=9606 GN=PPP1R12A PE=1 SV=1	0	177.644	30	30	1122	30	1030	115.2	5.4	232.49	299.24	97.18	394.67	354.09	314.59	21	25	20	25	28	27	4659	PPP1R12A	B4DZ09; F8VWB4; hsa:4659; O14974; Q2NKL4; Q569H0; Q86WU3; Q8NFR6; Q9BYH0	ENSG00000058272	Focal adhesion; Hippo-Merlin signaling dysregulation; Regulation of actin cytoskeleton	8	0	6.73488e+08	8.7274e+08	6.87219e+08	6.10538e+08	6.69242e+08	7.4269e+08	9.76555e+08	9.90086e+08	9.12971e+08	5.7455e+08	6.2215e+08	5.42306e+08	7.11958e+08	6.69525e+08	6.51933e+08	7.13929e+08	6.60995e+08	264432862
High	Master Protein	P61160	Actin-related protein 2 OS=Homo sapiens OX=9606 GN=ACTR2 PE=1 SV=1	0	177.436	41	16	890	16	394	44.7	6.74	186.7	209.95	48.71	358.86	339.64	409.36	11	12	8	15	15	13	10097	ACTR2	B2RCP5; D6W5F4; E9PF41; hsa:10097; O15142; P61160; Q96C82	ENSG00000138071	Physico-chemical features and toxicity-associated pathways; Embryonic stem cell pluripotency pathways	8	0	5.89031e+08	7.58996e+08	4.24303e+08	5.63502e+08	3.13709e+08	3.39042e+08	3.13983e+08	3.70072e+08	310758699	1.57149e+08	4.3648e+08	3.05489e+08	3.19797e+08	9.91549e+08	6.33973e+08	1158616539	5.8856e+08	2.96893e+08
High	Master Protein	P07911	Uromodulin OS=Homo sapiens OX=9606 GN=UMOD PE=1 SV=1	0	177.425	26	18	3627	18	640	69.7	5.24	395.69	787.54	863.31	874.79	1457.22	962.01	14	16	16	17	17	16	7369	UMOD	B3KP48; B3KRN9; E9PEA4; hsa:7369; P07911; Q540J6; Q6ZS84; Q8IYG0	ENSG00000169344		1	0	2407629353	1892341517	3.71526e+08	7.62112e+08	780294641	2522153514	4.9395e+08	2602911951	4682669846	9.81442e+08	4.34463e+08	2.45382e+08	2056586018	2563860695	9.57243e+08	3615011221	8023307084	6829350047
High	Master Protein	Q9H2M3	S-methylmethionine--homocysteine S-methyltransferase BHMT2 OS=Homo sapiens OX=9606 GN=BHMT2 PE=1 SV=1	0	177.328	63	19	5241	13	363	40.3	5.87	989.92	1217.96	303.76	1591.22	1312.54	1910.11	15	15	13	15	16	17	23743	BHMT2	B7Z516; hsa:23743; Q9H2M3; Q9NXX7	ENSG00000132840	Allograft rejection; Trans-sulfuration, one-carbon metabolism and related pathways	3	0	3.98281e+08	156067908	3.78652e+08	8.86858e+08	2.25341e+08	3.55921e+08	440878895	3.60282e+08	5.46768e+08	2.20317e+08	4.8697e+08	6.02354e+08	3.32307e+08	122567214	388629728	1.59546e+08	3.92418e+08	3.39409e+08
High	Master Protein	P56199	Integrin alpha-1 OS=Homo sapiens OX=9606 GN=ITGA1 PE=1 SV=2	0	177.121	22	27	1088	27	1179	130.8	6.29	180.39	240.65	81.31	383.78	262.42	347.03	19	22	17	22	21	21	3672	ITGA1	B2RNU0; hsa:3672; P56199	ENSG00000213949	Integrin-mediated cell adhesion; Arrhythmogenic right ventricular cardiomyopathy; miRNA targets in ECM and membrane receptors; Focal adhesion; Hepatocyte growth factor receptor signaling; NOTCH1 regulation of endothelial cell calcification; PI3K-Akt signaling pathway; Ebola virus infection in host; Malignant pleural mesothelioma; Regulation of actin cytoskeleton	16	0	8.8929e+08	1139311539	5.70551e+08	1106973986	5.91471e+08	9.80037e+08	7.89016e+08	1082853042	1347507828	1096594550	1049702199	1006908642	8.02543e+08	1107508039	1217526855	1405387516	1026070464	6.22459e+08
High	Master Protein	Q9Y5X3	Sorting nexin-5 OS=Homo sapiens OX=9606 GN=SNX5 PE=1 SV=1	0	176.967	46	25	1676	24	404	46.8	6.76	267.56	294.35	105.35	433.84	474.43	535.77	18	19	16	24	20	21	27131	SNX5	B7ZKN3; D3DW26; hsa:27131; Q52LC4; Q7KZN0; Q9BWP0; Q9Y5X3	ENSG00000089006		1	2	6.26717e+08	7.12733e+08	5.46075e+08	1106984535	1108800881	5.90931e+08	1432815817	684176784	4.79242e+08	443131636	1068694424	1273792213	8.41204e+08	6.94905e+08	1072510191	5.60218e+08	8.54053e+08	1104186244
High	Master Protein	Q00341	Vigilin OS=Homo sapiens OX=9606 GN=HDLBP PE=1 SV=2	0	176.913	27	32	992	32	1268	141.4	6.87	199.25	225.29	51.9	393.22	395.51	389.32	21	18	11	27	25	25	3069	HDLBP	B4DTQ2; E7EM71; hsa:3069; Q00341; Q53QU2; Q9UCY3	ENSG00000115677	2q37 copy number variation syndrome	2	0	2.90731e+08	4.02232e+08	3.23373e+08	3.00113e+08	4.25559e+08	782600676	7.89495e+08	5.06013e+08	713101537	398642419	3.88499e+08	3.69371e+08	4.75007e+08	5.18306e+08	5.20544e+08	4.25713e+08	4.54113e+08	5.22513e+08
High	Master Protein	O94979	Protein transport protein Sec31A OS=Homo sapiens OX=9606 GN=SEC31A PE=1 SV=3	0	176.909	21	24	1256	24	1220	132.9	6.89	248.28	227.28	91.98	455.42	418.88	370.36	24	22	17	24	24	24	22872	SEC31A	B4DIW6; B7ZKZ7; B7ZL00; H7C2W3; hsa:22872; O94979; Q17RR5; Q5H9P6; Q5XG74; Q659G7; Q6ZU90; Q7LCX9; Q86TJ0; Q8IZH4; Q9P048; Q9P0A6; Q9UM05; Q9UM06	ENSG00000138674	Sterol regulatory element-binding proteins (SREBP) signaling	6	0	6.35806e+08	8.96753e+08	6.04058e+08	7.90823e+08	1046442592	1012626884	1099534636	6.25723e+08	1026490873	9.98873e+08	1127234015	9.47447e+08	8.82082e+08	8.96745e+08	9.8708e+08	1037907398	8.86034e+08	1087680699
High	Master Protein	Q96DC8	Enoyl-CoA hydratase domain-containing protein 3, mitochondrial OS=Homo sapiens OX=9606 GN=ECHDC3 PE=1 SV=2	0	176.876	57	15	1726	15	303	32.6	8.65	259.32	393.53	142.23	444.57	459.12	768.34	12	11	11	13	14	15	79746	ECHDC3	hsa:79746; Q53HR9; Q5W0J7; Q8WYY8; Q96DC8; Q9BVL8; Q9H7G4	ENSG00000134463	Fatty acid biosynthesis	1	0	1254400099	5.14682e+08	1382042393	1483035620	1089695711	6.30175e+08	1730917723	1136679488	6.83495e+08	5.89396e+08	1094234553	1190410372	1026171079	3.46171e+08	5.47008e+08	3.73176e+08	6.44873e+08	2.46455e+08
High	Master Protein	O95678	Keratin, type II cytoskeletal 75 OS=Homo sapiens OX=9606 GN=KRT75 PE=1 SV=2	0	176.709	21	20	3047	2	551	59.5	7.74	453.12	532.7	160.29	856.91	849.03	800.15	17	18	12	18	19	20	9119	KRT75	B4DQU4; hsa:9119; O95678; Q9NSA9	ENSG00000170454		2	0	4.40008e+07	1.48963e+08	4.26236e+07	3.18395e+07	5.54876e+08	5.78127e+07	1.44204e+08	1.47688e+07	5.99053e+07	1.47989e+07	5.30327e+07	2.57793e+08	2.36001e+07	5.95144e+08	8.09969e+07	8.06822e+07	7.81032e+07	6.91717e+07
High	Master Protein	P46952	3-hydroxyanthranilate 3,4-dioxygenase OS=Homo sapiens OX=9606 GN=HAAO PE=1 SV=2	0	176.669	68	18	904	18	286	32.5	5.88	101.46	193.82	29.39	183.85	206.89	446.92	15	14	10	17	15	16	23498	HAAO	A6NE56; B4DIN2; hsa:23498; P46952; Q53QZ7; Q8N6N9	ENSG00000162882	NAD biosynthesis II (from tryptophan); Tryptophan metabolism	3	0	2299542947	1215771772	5.63363e+08	3370787888	2.78613e+08	1959024301	527789397	3.86102e+08	1438173763	4471054737	1720922015	2690571779	2427977824	2125390828	2034470522	3797798847	2575829983	2446358565
High	Master Protein	Q15459	Splicing factor 3A subunit 1 OS=Homo sapiens OX=9606 GN=SF3A1 PE=1 SV=1	0	176.485	38	26	935	26	793	88.8	5.22	187.61	207.13	52.9	309.83	332.87	355.85	16	14	14	19	20	22	10291	SF3A1	E9PAW1; hsa:10291; Q15459	ENSG00000099995	mRNA processing	2	0	378350936	4.90774e+08	3.76951e+08	4.57955e+08	3.3926e+08	5.40237e+08	4.59534e+08	4.96569e+08	3.78086e+08	3.84462e+08	4.40879e+08	3.69734e+08	4.95273e+08	5.24669e+08	5.33727e+08	6.78117e+08	4.83235e+08	4.67149e+08
High	Master Protein	Q9BPW8	Protein NipSnap homolog 1 OS=Homo sapiens OX=9606 GN=NIPSNAP1 PE=1 SV=1	0	176.293	53	18	2148	16	284	33.3	9.31	431.49	627.45	160.81	685.09	628.52	1029.51	15	15	12	15	17	18	8508	NIPSNAP1	B2RAY3; hsa:8508; O43800; Q9BPW8	ENSG00000184117		0	2	1074223173	7.5369e+08	1207889178	1867748021	1205262412	1191989540	1557017606	1293661370	1927815936	9.33614e+08	1158261324	1800277880	1180788096	6.2011e+08	1295428981	4.07859e+08	8.58288e+08	5.24054e+08
High	Master Protein	O00499	Myc box-dependent-interacting protein 1 OS=Homo sapiens OX=9606 GN=BIN1 PE=1 SV=1	0	175.853	44	22	1049	20	593	64.7	5.06	155.01	231.97	111.7	341.81	438.79	468.99	17	15	15	16	22	18	274	BIN1	hsa:274; O00297; O00499; O00545; O43867; O60552; O60553; O60554; O60555; O75514; O75515; O75516; O75517; O75518; Q659B7; Q92944; Q99688	ENSG00000136717	VEGFA-VEGFR2 signaling; IL-18 signaling pathway	3	2	5.76755e+08	5.97863e+08	6.41635e+08	6.69103e+08	4.41541e+08	7.07484e+08	6.22741e+08	699640274	9.9998e+08	4.8657e+08	5.77813e+08	4.60296e+08	5.25932e+08	4.98229e+08	5.73475e+08	514154508	4.38464e+08	4.2122e+08
High	Master Protein	P07737	Profilin-1 OS=Homo sapiens OX=9606 GN=PFN1 PE=1 SV=2	0	175.77	72	15	4939	15	140	15	8.27	1142.74	1213.24	527.56	2041.43	2044.08	1845.16	12	12	11	13	14	12	5216	PFN1	hsa:5216; P07737; Q53Y44	ENSG00000108518	Physico-chemical features and toxicity-associated pathways; VEGFA-VEGFR2 signaling; Burn wound healing; Regulation of actin cytoskeleton; G13 signaling pathway	9	0	5041965377	5483422539	4637397629	4898078270	2909577555	5277320042	3728083837	5983528688	5718314923	5.94059e+08	3682096956	4025176438	5689286638	8300342276	6035939035	6148385323	7158791762	5638378199
High	Master Protein	P30085	UMP-CMP kinase OS=Homo sapiens OX=9606 GN=CMPK1 PE=1 SV=3	0	175.15	62	14	1718	14	196	22.2	5.57	291.94	319.6	120.18	391.37	635.63	690.04	10	10	9	11	14	12	51727	CMPK1	B2R6S5; B4DPU7; E9PGI8; hsa:51727; P30085; Q53GB7; Q5SVZ0; Q96C07; Q9UBQ8; Q9UIA2	ENSG00000162368	Pyrimidine metabolism	2	0	5.30206e+08	4.59657e+08	1183854226	857696313	4.05559e+08	4.99139e+08	5.19172e+08	5.2424e+08	668299616	3.2317e+08	5.30905e+08	5.40278e+08	7.06433e+08	7.2794e+08	5.88629e+08	3.65035e+08	7.05725e+08	7.20762e+08
High	Master Protein	O43837	Isocitrate dehydrogenase [NAD] subunit beta, mitochondrial OS=Homo sapiens OX=9606 GN=IDH3B PE=1 SV=2	0	174.884	51	19	686	19	385	42.2	8.46	107.53	94.72	31.31	155.21	163.28	252.61	13	12	8	14	17	17	3420	IDH3B	B2RDR1; D3DVX2; D3DVX3; hsa:3420; O43837; O95106; Q5JXS8; Q9NQ06; Q9NQ07; Q9NUZ0; Q9UEX0; Q9UG99	ENSG00000101365	TCA cycle (aka Krebs or citric acid cycle)	2	0	2.99234e+08	257577762	3.92911e+08	4.24533e+08	2.0543e+08	2.71025e+08	2.80318e+08	2.87729e+08	4.36963e+08	4.2212e+08	3.15177e+08	3.94546e+08	3.61693e+08	3.0439e+08	3.21343e+08	2.2463e+08	2.10307e+08	1.88334e+08
High	Master Protein	Q02818	Nucleobindin-1 OS=Homo sapiens OX=9606 GN=NUCB1 PE=1 SV=4	0	174.688	49	23	749	23	461	53.8	5.25	79.47	134	60.42	188.46	262.26	241.81	14	18	15	17	21	20	4924	NUCB1	B2RD64; hsa:4924; Q02818; Q15838; Q7Z4J7; Q9BUR1	ENSG00000104805		2	0	5.30746e+08	503745654	5.66032e+08	369952954	3.09111e+08	4.87766e+08	4.75345e+08	4.96896e+08	4.57982e+08	4.10789e+08	393620955	2.22475e+08	3.50644e+08	5.26298e+08	4.02254e+08	5.49374e+08	3.23899e+08	1.44326e+08
High	Master Protein	O75955	Flotillin-1 OS=Homo sapiens OX=9606 GN=FLOT1 PE=1 SV=3	0	174.544	53	19	880	19	427	47.3	7.49	182.42	158.52	36.93	325.74	406.54	347.63	16	14	9	17	16	19	10211	FLOT1	B4DVY7; hsa:10211; O75955; Q969J8; Q9UHW1; Q9UNV8	ENSG00000137312; ENSG00000206379; ENSG00000206480; ENSG00000230143; ENSG00000232280	Angiopoietin-like protein 8 regulatory pathway; Insulin signaling	8	0	3.57725e+08	4.62801e+08	3.33422e+08	312713499	3.71109e+08	4.3611e+08	2296322605	4.41125e+08	2.58307e+08	2.43882e+08	3.02662e+08	3.02174e+08	4.00121e+08	3.23103e+08	5.28923e+08	2.25073e+08	410927669	4.79647e+08
High	Master Protein	P30740	Leukocyte elastase inhibitor OS=Homo sapiens OX=9606 GN=SERPINB1 PE=1 SV=1	0	174.31	55	22	1026	21	379	42.7	6.28	141.66	169.35	54.18	266.55	376.74	408.62	15	19	13	15	19	20	1992	SERPINB1	A8K5L2; B4DNT0; hsa:1992; P30740; Q53FB9; Q5W0E1; Q9UDF8	ENSG00000021355	Vitamin D receptor pathway	2	1	6.08174e+08	5.79993e+08	6.70366e+08	7.4164e+08	2.30769e+08	3.75669e+08	4.34103e+08	4.91526e+08	4.48722e+08	2.89424e+08	4.49072e+08	6.54271e+08	5.813e+08	8.53358e+08	6.71142e+08	6.87348e+08	716261722	1147640801
High	Master Protein	P30040	Endoplasmic reticulum resident protein 29 OS=Homo sapiens OX=9606 GN=ERP29 PE=1 SV=4	0	173.954	46	18	4007	18	261	29	7.31	983.38	998.07	435.97	1663.77	1657.04	1720.73	16	16	16	17	18	17	10961	ERP29	C9J183; hsa:10961; P30040; Q3MJC3; Q6FHT4	ENSG00000089248		0	0	1823753482	1586583458	2427808736	3013746760	1972894359	1168565181	2008604663	1673574981	1615790672	5.96839e+08	2267716334	2154542778	2319066692	1820367700	2255114257	1324341574	2136018676	2812811546
High	Master Protein	Q9Y2T3-3	Isoform 3 of Guanine deaminase OS=Homo sapiens OX=9606 GN=GDA	0	173.734	45	23	2237	23	471	52.8	5.85	451.89	506.18	106.31	782.65	737.73	659.65	18	17	13	18	21	20		GDA	Q9Y2T3-3			0	0	1724564392	1389500595	1141227931	1554991811	1682848924	1668527755	1652828793	1205729803	1142494837	2580970873	2656123154	1293444205	1586842181	2984667003	2288786136	2043059400	1546914872	1925791189
High	Master Protein	Q5SSJ5	Heterochromatin protein 1-binding protein 3 OS=Homo sapiens OX=9606 GN=HP1BP3 PE=1 SV=1	0	173.463	36	26	1680	26	553	61.2	9.67	305.23	378.6	125	689.75	572.71	616.82	21	23	12	26	22	25	50809	HP1BP3	A6NI71; A8K5D7; B3KMZ8; B4E210; hsa:50809; Q05BI0; Q5SSJ5; Q5SSJ6; Q5SWC6; Q6PIM9; Q8NDF0; Q9UHY0	ENSG00000127483		0	0	1051117178	2025718309	1304281348	1227684747	1367250760	1697600692	1574340739	1393606219	9.47363e+08	3220270188	2441180608	1772494597	2197069064	1606736635	1430380757	2919744968	1888689134	1889986174
High	Master Protein	P30153	Serine/threonine-protein phosphatase 2A 65 kDa regulatory subunit A alpha isoform OS=Homo sapiens OX=9606 GN=PPP2R1A PE=1 SV=4	0	173.135	32	20	1586	20	589	65.3	5.11	229.08	320.82	68.27	435.07	403.04	588.14	17	16	12	18	18	20	5518	PPP2R1A	hsa:5518; P30153; Q13773; Q6ICQ3; Q96DH3	ENSG00000105568	Focal adhesion: PI3K-Akt-mTOR-signaling pathway; Wnt signaling pathway and pluripotency; PI3K-Akt signaling pathway; 16p11.2 proximal deletion syndrome; Glycogen synthesis and degradation; Cohesin complex - Cornelia de Lange syndrome	49	0	5.39236e+08	8.89886e+08	638131265	8.59889e+08	733806691	8.34142e+08	8.39555e+08	8.44325e+08	1077956682	1085935645	7.07466e+08	7.79841e+08	6.27656e+08	9.69816e+08	8.83004e+08	8.22288e+08	7.15349e+08	1171137776
High	Master Protein	P04181	Ornithine aminotransferase, mitochondrial OS=Homo sapiens OX=9606 GN=OAT PE=1 SV=1	0	173.085	48	20	843	20	439	48.5	7.03	175.77	200.65	92.54	244.98	183.05	515.81	19	17	15	17	17	18	4942	OAT	D3DRF0; hsa:4942; P04181; Q16068; Q16069; Q68CS0; Q6IAV9; Q9UD03	ENSG00000065154	Amino acid metabolism; 22q11.2 copy number variation syndrome; Creatine pathway	4	0	4.01887e+08	2.54745e+08	5.4302e+08	7.26347e+08	5.67648e+08	4.83557e+08	4.23292e+08	3.32122e+08	4.75506e+08	3.84912e+08	5.1334e+08	5.76589e+08	5.99648e+08	2.47117e+08	4.60433e+08	2.57107e+08	3.85627e+08	5.99304e+08
High	Master Protein	Q15599-2	Isoform 2 of Na(+)/H(+) exchange regulatory cofactor NHE-RF2 OS=Homo sapiens OX=9606 GN=NHERF2	0	173.08	63	22	1350	13	326	36.1	8.21	384.99	311	68.15	476.24	423.11	686.68	19	16	11	17	15	20		NHERF2	Q15599-2			0	10	1199619429	1541952699	1588065239	1321358284	1158129904	1251818064	8.34297e+08	1422885455	1095045823	7.19787e+08	1702210453	1376821894	1147309870	1371992139	1237614017	3.73289e+08	1163843890	6.77908e+08
High	Master Protein	Q9UQ80	Proliferation-associated protein 2G4 OS=Homo sapiens OX=9606 GN=PA2G4 PE=1 SV=3	0	172.886	47	21	1642	21	394	43.8	6.55	242.23	314.36	110.1	540.77	516.77	621.93	18	19	16	19	21	20	5036	PA2G4	hsa:5036; O43846; Q9UM59; Q9UQ80	ENSG00000170515		1	0	1028994659	1105544764	1053143649	1348073710	1149298616	1342989331	1565302222	1073910185	1460550578	8.79937e+08	9.98662e+08	1027529724	1055846964	1239049098	1340508436	1267943254	1047834732	1114520951
High	Master Protein	Q9H0U4	Ras-related protein Rab-1B OS=Homo sapiens OX=9606 GN=RAB1B PE=1 SV=1	0	172.844	83	19	1984	8	201	22.2	5.73	367.03	451.09	129.05	824.21	623.78	643.81	12	13	11	16	16	14	81876	RAB1B	A8K7S1; hsa:81876; Q9H0U4	ENSG00000174903		6	0	5.93091e+07	6.64346e+07	6.49828e+07	2.45235e+08	5.84256e+07	6.29904e+07	9.25229e+07	1.44967e+08	1.10918e+08	1.31708e+08	6.06672e+07	9.54218e+07	3.72076e+07	1.93513e+08	9.82642e+07	5.61456e+07	5.06021e+07	2.4783e+08
High	Master Protein	P17844	Probable ATP-dependent RNA helicase DDX5 OS=Homo sapiens OX=9606 GN=DDX5 PE=1 SV=1	0	172.806	46	29	1949	21	614	69.1	8.92	379.25	391.1	119.79	652.33	746.92	611.17	21	18	16	24	25	27	1655	DDX5	B4DLW8; B5BU21; D3DU32; E7ETL9; hsa:1655; O75681; P17844; Q53Y61	ENSG00000108654	Ciliary landscape	6	0	5.34062e+08	6.75422e+08	5.73937e+08	634465157	6.59321e+08	6.8658e+08	913817764	7.26904e+08	7.72577e+08	2.71378e+08	9.13708e+08	6.96885e+08	6.36973e+08	5.78544e+08	767459524	5.02939e+08	6.62214e+08	8.34272e+08
High	Master Protein	P50552	Vasodilator-stimulated phosphoprotein OS=Homo sapiens OX=9606 GN=VASP PE=1 SV=3	0	172.665	49	23	1199	23	380	39.8	8.94	195.65	250.36	99.66	412.16	489.11	445.22	17	18	16	21	20	18	7408	VASP	B2RBT9; hsa:7408; P50552; Q6PIZ1; Q93035	ENSG00000125753	Integrin-mediated cell adhesion; Focal adhesion	5	0	3.76615e+08	3.12326e+08	2.65265e+08	2.86353e+08	1.11632e+08	2.20962e+08	3.38849e+08	2.41546e+08	4.43359e+08	1.04503e+08	2.19087e+08	1.7072e+08	2.97696e+08	2.84004e+08	2.79129e+08	2.63951e+08	3.08362e+08	2.72243e+08
High	Master Protein	P23588	Eukaryotic translation initiation factor 4B OS=Homo sapiens OX=9606 GN=EIF4B PE=1 SV=2	0	172.66	40	27	1272	27	611	69.1	5.73	229.22	243.07	101.04	385.1	499.86	478.94	21	19	21	25	26	24	1975	EIF4B	B4DS13; hsa:1975; P23588; Q4G0E3; Q53HQ2; Q6GPH5; Q6IB46; Q8WYK5	ENSG00000063046	Translation factors; Focal adhesion: PI3K-Akt-mTOR-signaling pathway; PI3K-Akt signaling pathway; Translation inhibitors in chronically activated PDGFRA cells; Perturbations to host-cell autophagy, induced by SARS-CoV-2 proteins; Malignant pleural mesothelioma; Interferon type I signaling pathways	14	0	5.67144e+08	6.25442e+08	8.98509e+08	5.65785e+08	3.41209e+08	5.10188e+08	6.44802e+08	6.01843e+08	1057860648	4783837268	6.67949e+08	5.26895e+08	5.53417e+08	4.59297e+08	5.66903e+08	6.0034e+08	4.92361e+08	4.00193e+08
High	Master Protein	P01859	Immunoglobulin heavy constant gamma 2 OS=Homo sapiens OX=9606 GN=IGHG2 PE=1 SV=2	0	172.544	46	16	7930	5	326	35.9	7.59	1256.03	2156.02	785.75	2480.53	1613.62	1087.96	16	14	13	15	13	13						0	1	2476851251	2437710536	1949106677	1136967369	7.61219e+08	5792167427	8.89415e+08	8.57691e+08	9.70709e+08	317265513	1964022716	6.84536e+08	1056053180	3578414539	5.33716e+08	2552029404	5685614531	11962173994
High	Master Protein	Q96G03	Phosphopentomutase OS=Homo sapiens OX=9606 GN=PGM2 PE=1 SV=4	0	172.302	36	27	785	26	612	68.2	6.73	109.08	111.26	22.97	268.7	228.59	235.25	19	15	9	23	22	24	55276	PGM2	B4E0G8; hsa:55276; Q53FP5; Q5QTR0; Q96G03; Q9H0P9; Q9NV22	ENSG00000169299	Clear cell renal cell carcinoma pathways; Glucuronidation	4	1	4.5383e+08	8.02675e+08	462466441	5.45419e+08	3.1272e+08	6.71932e+08	5.12308e+08	619491155	1022856185	8.44958e+08	5.37442e+08	6.02133e+08	6.53031e+08	9.54267e+08	7.1997e+08	1164904996	6.61425e+08	4.03857e+08
High	Master Protein	P51648	Aldehyde dehydrogenase family 3 member A2 OS=Homo sapiens OX=9606 GN=ALDH3A2 PE=1 SV=1	0	172.254	33	17	1696	17	485	54.8	7.88	350.19	501.28	101.34	613.83	532.73	714.22	15	16	13	16	15	17	224	ALDH3A2	hsa:224; P51648; Q6I9T3; Q93011; Q96J37	ENSG00000072210	Fragile X syndrome; Fluoroacetic acid toxicity	4	0	8.46454e+08	7.94483e+08	5.62832e+08	1285090068	1168947347	9.17781e+08	2475226828	9.51239e+08	645961293	1059713892	1250372449	8.38964e+08	4.99873e+08	7.15414e+08	1047512438	6.35628e+08	8.60171e+08	9.50748e+08
High	Master Protein	P22830	Ferrochelatase, mitochondrial OS=Homo sapiens OX=9606 GN=FECH PE=1 SV=2	0	171.768	39	14	648	14	423	47.8	8.73	110.86	182.51	187.05	160.05	121.95	298.39	10	8	10	12	10	12	2235	FECH	A8KA72; hsa:2235; P22830; Q8IXN1; Q8NAN0	ENSG00000066926	Hemesynthesis defects and porphyrias; Heme biosynthesis	3	0	2.36527e+08	2.0498e+08	3.95347e+08	4.57347e+08	3.46503e+08	3.15862e+08	1.94299e+08	3.21859e+08	4.22096e+08	166516458	2.48783e+08	4.24362e+08	671737221	1.97101e+08	4.22365e+08	2.1018e+08	3.49475e+08	2.24705e+08
High	Master Protein	O94826	Mitochondrial import receptor subunit TOM70 OS=Homo sapiens OX=9606 GN=TOMM70 PE=1 SV=1	0	171.749	34	16	950	16	608	67.4	7.12	284.85	349.21	88.72	428.56	419.34	595.49	12	13	8	14	13	16	9868	TOMM70	D3DN48; hsa:9868; O94826	ENSG00000154174	Mitochondrial immune response to SARS-CoV-2; SARS-CoV-2 B.1.1.7 variant antagonises innate immune activation; SARS-CoV-2 mitochondrial chronic oxidative stress and endothelial dysfunction	9	0	3.77942e+08	3.62669e+08	356000446	7.01803e+08	4.60142e+08	4.97875e+08	6.09983e+08	491287413	6.84449e+08	365403042	4.62188e+08	4.98041e+08	4.65395e+08	3.65518e+08	5.54346e+08	3.46277e+08	3.96411e+08	347852998
High	Master Protein	P82909	Alpha-ketoglutarate dehydrogenase component 4 OS=Homo sapiens OX=9606 GN=MRPS36 PE=1 SV=2	0	171.459	75	10	1988	10	103	11.5	9.99	532	651.78	238.42	658.27	861.12	1118.81	9	10	8	8	9	9	92259	MRPS36	hsa:92259; P82909; Q9H2H4	ENSG00000134056; ENSG00000278461		3	0	7.87584e+08	5.04224e+08	2080337683	1283944611	7.13133e+08	6.07114e+08	1033082859	8.99777e+08	1113967683	2.88273e+08	8.6914e+08	8.94285e+08	6.99443e+08	4.90664e+08	6.87905e+08	3.45582e+08	4.82953e+08	5.05976e+08
High	Master Protein	P62333	26S proteasome regulatory subunit 10B OS=Homo sapiens OX=9606 GN=PSMC6 PE=1 SV=1	0	171.269	55	20	907	20	389	44.1	7.49	202.77	178.21	65.58	364.95	366.56	456.21	16	15	11	18	18	17	5706	PSMC6	B2R975; hsa:5706; P49719; P62333; Q6IBU3; Q92524	ENSG00000100519	Proteasome degradation; Alzheimer's disease and miRNA effects; Parkin-ubiquitin proteasomal system pathway; Ciliary landscape; Alzheimer's disease	64	0	2.1547e+08	2.00252e+08	298526027	367609369	1.06397e+08	183496164	1.61397e+08	2.13649e+08	2.89614e+08	1.03205e+08	1.70114e+08	2.40008e+08	3.70259e+08	2.12416e+08	2.58648e+08	2.5316e+08	2.69538e+08	4.72979e+08
High	Master Protein	Q9BXN1	Asporin OS=Homo sapiens OX=9606 GN=ASPN PE=1 SV=2	0	170.953	38	20	1479	20	380	43.4	7.08	359.08	350.3	52.04	410.88	470.69	802.76	15	13	8	16	16	18	54829	ASPN	hsa:54829; Q5TBF3; Q96K79; Q96LD0; Q9BXN1; Q9NXP3	ENSG00000106819		1	0	9.28349e+08	4.02371e+08	9.38031e+08	921643638	4.89075e+08	5.59e+08	3.31078e+08	795024154	3.97894e+08	3.09679e+08	4.36982e+08	6.1303e+08	4.14749e+08	1.93733e+08	5.95331e+08	6.47661e+08	439335890	420062499
High	Master Protein	Q9UHG3	Prenylcysteine oxidase 1 OS=Homo sapiens OX=9606 GN=PCYOX1 PE=1 SV=3	0	170.8	38	18	1099	18	505	56.6	6.18	166.82	295.33	40.45	344.77	280.94	389.9	13	16	10	16	14	17	51449	PCYOX1	B2RB14; B7Z9P8; hsa:51449; O94982; Q8N4N5; Q96QM8; Q9UHG3	ENSG00000116005		0	0	2.70923e+08	4.1602e+08	5.03619e+08	5.7624e+08	8.55308e+08	7.70792e+08	5.67108e+08	5.212e+08	5.39041e+08	1066282373	588309299	6.41172e+08	4.13331e+08	5.56844e+08	6.43955e+08	5.92533e+08	4.46664e+08	5.57714e+08
[truncated: 3,512 more rows]
[truncated: 130 more columns]

## Sheet: Table S7a
Table S4a_FSGS vs Donor_DAP results
	logFC	AveExpr	t	P.Value	adj.P.Val	B
IGKV3-20	4.04053	1.15954	7.14159	6.06296e-10	1.56338e-06	12.3532
AHSG	2.25821	3.11387	7.09154	7.50181e-10	1.56338e-06	12.1544
[truncated: 4,166 more rows]

## Sheet: Table S7b
Table S4b_FSGS vs Donor_GO ORA_enriched in FSGS
[truncated: 281 more rows]

## Sheet: Table S7c
Table S4c_FSGS vs Donor_GSEA
[truncated: 684 more rows]

[truncated: 8 more sheets: Table S8a, Table S8b, Table S8c, Table S9a, Table S9b, Table S9c, Table S10, Table S11]
